# Supplementary material for: Insights into archaeal evolution and symbiosis from the genomes of a nanoarchaeon and its inferred crenarchaeal host from Obsidian Pool, Yellowstone National Park
Source: Springer Nature journal article supplement (doi:10.1186/1745-6150-8-9), 2013-04-22
Supplement: 13062_2013_372_MOESM1_ESM.pdf [file 13062_2013_372_MOESM1_ESM.pdf]

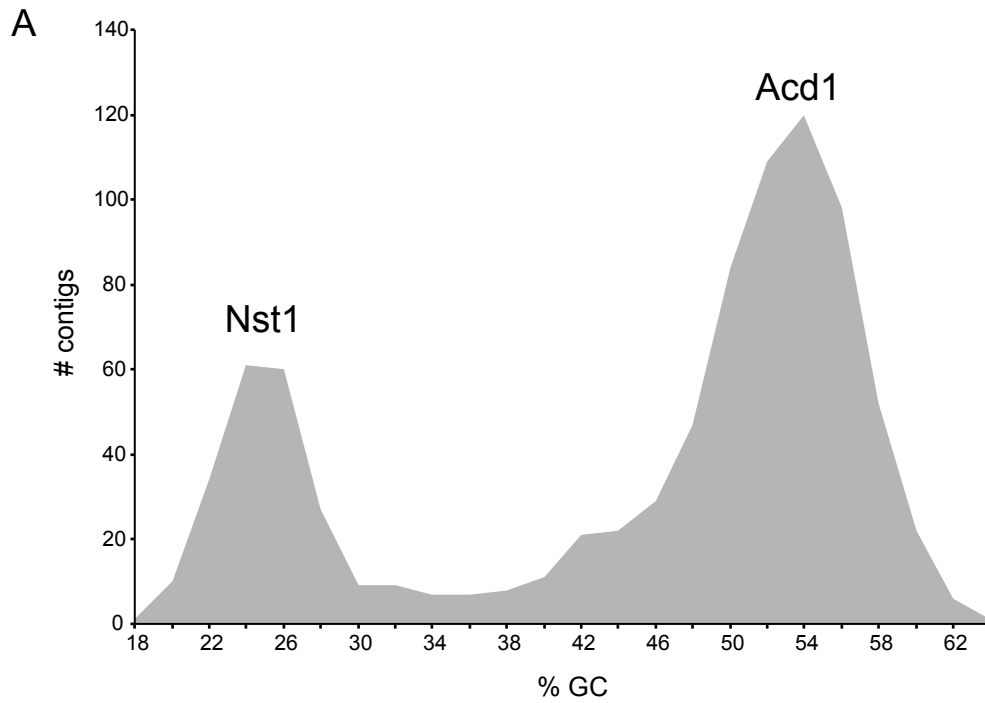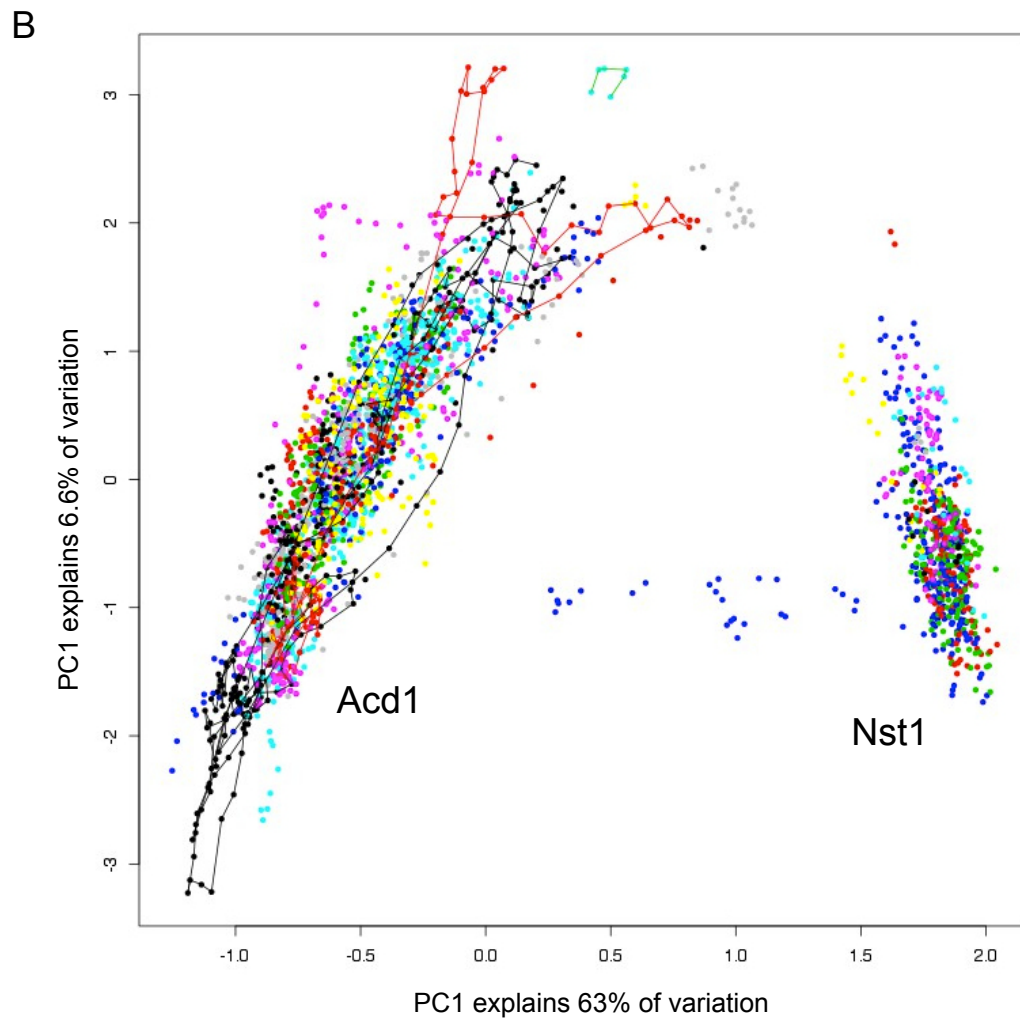

Additional file 1. Composition analysis of the raw genomic assembly of the Nst1-Acd1 SAGs based on G+C% (A) and kmer tetranucleotide frequencies (B).
