# Supplementary material for: Insights into archaeal evolution and symbiosis from the genomes of a nanoarchaeon and its inferred crenarchaeal host from Obsidian Pool, Yellowstone National Park
Source: Springer Nature journal article supplement (doi:10.1186/1745-6150-8-9), 2013-04-22
Supplement: 13062_2013_372_MOESM2_ESM.pdf [file 13062_2013_372_MOESM2_ESM.pdf]

Additional file 2. Nst1 and Acd1 gene annotations

Nst1

| Locus        | Contig | arCOG      | COG class | Symbol | Annotation                                                                                                                           | Best NR database hit | Blast Score | Best hit phylum              | Best hit species                                 |
|--------------|--------|------------|-----------|--------|--------------------------------------------------------------------------------------------------------------------------------------|----------------------|-------------|------------------------------|--------------------------------------------------|
| Nst1_001     | C1     | arCOG01168 | K         |        | Predicted ATPase (AAA+ superfamily)                                                                                                  | 17029072             |             |                              | Candidatus Korarchaeum cryptophilum OPF8         |
| Nst1_002     | C1     | arCOG03056 | I         | PgpB   | Membrane-associated phospholipid phosphatase                                                                                         | 392397672            | 63.9        | Bacteroidetes/Chlorobi group | Fluxibacter litoralis DSM 6794                   |
| Nst1_003     | C1     |            |           |        | Uncharacterized protein                                                                                                              | 229579421            | 95.1        | Crenarchaeota                | Sulfolobus islandicus Y.G.57.14                  |
| Nst1_004     | C1     | arCOG02097 | E         | AroD   | 3-dehydroquinate dehydratase                                                                                                         | 374634112            | 176         | Crenarchaeota                | Metallophaera yellowstonensis MK1                |
| Nst1_005     | C1     |            |           |        | Uncharacterized protein                                                                                                              |                      |             |                              |                                                  |
| Nst1_006     | C1     | arCOG01891 | F         | Tmk    | Thymidylate kinase<br>Predicted metal-dependent RNase, consists of a metallo-beta-lactamase domain and an RNA-binding KH domain      | 225848089            | 121         | Aquificae                    | Sulfurhydrogenibium azorensis Az-Fu1             |
| Nst1_007     | C1     | arCOG00543 | R         |        |                                                                                                                                      | 41614872             | 525         | Nanoarchaeota                | Nanoarchaeum equitans Kin4-M                     |
| Nst1_008     | C1     | arCOG00970 | O         | PRE1   | 20S proteasome, beta subunit                                                                                                         | 242399181            | 156         | Euryarchaeota                | Thermococcus sibiricus MM 739                    |
| Nst1_009     | C1     | arCOG01764 | K         | SPT15  | TATA-box binding protein (TBP), component of TFIID and TFIIB                                                                         | 18977667             | 95.5        | Euryarchaeota                | Pyrococcus furiosus DSM 3638                     |
| Nst1_010     | C1     | arCOG00807 | J         | IleS   | Isoleucyl-tRNA synthetase                                                                                                            | 41615024             | 733         | Nanoarchaeota                | Nanoarchaeum equitans Kin4-M                     |
| Nst1_011     | C1     |            |           |        | Uncharacterized protein                                                                                                              |                      |             |                              |                                                  |
| Nst1_012     | C1     | arCOG02868 | O         | DsbG   | Protein-disulfide isomerase                                                                                                          | 161529166            | 114         | Thaumarchaeota               | Nitrososphaera maritimus SCM1                    |
| Nst1_013     | C1     | arCOG01561 | J         | TEF1   | Translation elongation factor EF-1alpha (GTPase)                                                                                     | 218884679            | 525         | Crenarchaeota                | Desulfurococcus kamchatkensis DSM 1221n          |
| Nst1_014     | C1     | arCOG01154 | R         |        | Calcineurin-like phosphoesterase superfamily protein                                                                                 | 229579815            | 711         | Crenarchaeota                | Sulfolobus islandicus Y.G.57.14                  |
| Nst1_015     | C1     | arCOG00144 | G         | ProP   | Permease of the major facilitator superfamily                                                                                        | 70607801             | 732         | Crenarchaeota                | Sulfolobus acidocaldarius DSM 639                |
| RNA Ile_TAT  |        |            |           |        | RNA Ile_TAT                                                                                                                          |                      |             |                              |                                                  |
| Nst1_016     | C1     | arCOG00439 | L         | MCM2   | Predicted ATPase involved in replication control, Cdc46/Mcm family                                                                   | 41615073             | 470         | Nanoarchaeota                | Nanoarchaeum equitans Kin4-M                     |
| Nst1_017     | C1     | arCOG02261 | R         |        | Protein containing OB-fold-like and PC1 domains<br>Translation initiation factor 2, beta subunit (eIF-2beta)/eIF-5 N-terminal domain | 333909939            | 78.2        | Euryarchaeota                | Methanotortus igneus Kol 5                       |
| Nst1_018     | C1     | arCOG01640 | J         | GCD7   |                                                                                                                                      | 41615113             | 113         | Nanoarchaeota                | Nanoarchaeum equitans Kin4-M                     |
| Nst1_019     | C1     | arCOG04051 | S         |        | Uncharacterized conserved protein                                                                                                    | 156937176            | 53.5        | Crenarchaeota                | Ignicoccus hospitalis KIN4/I                     |
| Nst1_020     | C1     | arCOG04149 | J         | NMD3   | NMD protein affecting ribosome stability and mRNA decay                                                                              | 41615029             | 77.4        | Nanoarchaeota                | Nanoarchaeum equitans Kin4-M                     |
| Nst1_021     | C1     |            |           |        | Uncharacterized protein                                                                                                              | 315213535            | 58.2        | Euryarchaeota                | Thermococcus barophilus MP                       |
| Nst1_022     | C1     | arCOG01179 | J         | InfA   | Translation initiation factor 1 (IF-1)                                                                                               | 18977954             | 105         | Euryarchaeota                | Pyrococcus furiosus DSM 3638                     |
| tRNA Trp_CCA |        |            |           |        | tRNA Trp_CCA                                                                                                                         |                      |             |                              |                                                  |
| Nst1_023     | C1     |            |           |        | Uncharacterized protein                                                                                                              |                      |             |                              |                                                  |
| Nst1_024     | C1     |            |           |        | Uncharacterized protein                                                                                                              | 269986439            | 44.3        | Euryarchaeota                | Candidatus Parvarchaeum acidiphilum ARMAN-4      |
| Nst1_025     | C1     | arCOG00487 | J         | ArgS   | Arginyl-tRNA synthetase                                                                                                              | 340344590            | 270         | Thaumarchaeota               | Candidatus Nitrosoarchaeum korensis MY1          |
| Nst1_026     | C1     | arCOG01758 | J         | RpsJ   | Ribosomal protein S10                                                                                                                | 41614880             | 90.1        | Nanoarchaeota                | Nanoarchaeum equitans Kin4-M                     |
| Nst1_027     | C1     | arCOG01923 | J         | SIK1   | Protein implicated in ribosomal biogenesis, Nop56p homolog                                                                           | 41615131             | 293         | Nanoarchaeota                | Nanoarchaeum equitans Kin4-M                     |
| Nst1_028     | C1     | arCOG00078 | J         | NOP1   | Fibrillarin-like rRNA methylase                                                                                                      | 41614921             | 246         | Nanoarchaeota                | Nanoarchaeum equitans Kin4-M                     |
| Nst1_029     | C1     | arCOG03461 | R         |        | Uncharacterized protein containing archaeal-type C2H2 Zn-finger                                                                      | 337282529            | 47.4        | Euryarchaeota                | Pyrococcus yayanosii CH1                         |
| Nst1_030     | C1     | arCOG04130 | J         |        | Predicted RNA-binding protein                                                                                                        | 41615122             | 166         | Nanoarchaeota                | Nanoarchaeum equitans Kin4-M                     |
| Nst1_031     | C1     | arCOG01016 | K         |        | DNA-directed RNA polymerase, subunit F (ppof)                                                                                        | 296109749            | 64.3        | Euryarchaeota                | Methanocaldococcus infernus ME                   |
| Nst1_032     | C1     | arCOG04129 | J         | RPL21A | Ribosomal protein L21E                                                                                                               | 41615184             | 130         | Nanoarchaeota                | Nanoarchaeum equitans Kin4-M                     |
| Nst1_033     | C1     |            |           |        | Uncharacterized membrane protein                                                                                                     |                      |             |                              |                                                  |
| Nst1_034     | C1     | arCOG03749 | S         |        | Uncharacterized membrane protein                                                                                                     | 325968799            | 85.1        | Crenarchaeota                | Vulcaniseta moutnovskia 768-28                   |
| Nst1_035     | C1     |            |           |        | Uncharacterized protein                                                                                                              |                      |             |                              |                                                  |
| Nst1_036     | C1     | arCOG10265 | S         |        | Uncharacterized conserved protein                                                                                                    | 15898780             | 271         | Crenarchaeota                | Sulfolobus solfataricus P2                       |
| Nst1_037     | C1     | arCOG10353 | S         |        | Uncharacterized conserved protein                                                                                                    | 15898779             | 191         | Crenarchaeota                | Sulfolobus solfataricus P2                       |
| Nst1_038     | C1     |            |           |        | Uncharacterized membrane protein                                                                                                     | 327311018            | 84.3        | Crenarchaeota                | Thermoproteus uzoniensis 768-20                  |
| Nst1_039     | C1     |            |           |        | Uncharacterized membrane protein                                                                                                     |                      |             |                              |                                                  |
| Nst1_040     | C1     |            |           |        | Uncharacterized protein                                                                                                              |                      |             |                              |                                                  |
| Nst1_041     | C1     |            |           |        | Uncharacterized protein                                                                                                              |                      |             |                              |                                                  |
| Nst1_042     | C1     |            |           |        | Uncharacterized protein                                                                                                              |                      |             |                              |                                                  |
| Nst1_043     | C1     |            |           |        | Uncharacterized protein                                                                                                              |                      |             |                              |                                                  |
| Nst1_044     | C1     |            |           |        | Uncharacterized protein                                                                                                              |                      |             |                              |                                                  |
| Nst1_045     | C1     |            |           |        | Uncharacterized protein                                                                                                              |                      |             |                              |                                                  |
| Nst1_046     | C1     |            |           |        | Uncharacterized protein                                                                                                              |                      |             |                              |                                                  |
| Nst1_047     | C1     |            |           |        | Uncharacterized membrane protein                                                                                                     |                      |             |                              |                                                  |
| Nst1_048     | C1     | arCOG04156 | J         | TYW3   | Wybutosine (YW) biosynthesis enzyme                                                                                                  | 41615114             | 126         | Nanoarchaeota                | Nanoarchaeum equitans Kin4-M                     |
| Nst1_049     | C1     |            |           |        | Uncharacterized protein                                                                                                              |                      |             |                              |                                                  |
| Nst1_050     | C1     | arCOG04281 | L         | DnaG   | DNA primase (bacterial type)                                                                                                         | 288930642            | 344         | Euryarchaeota                | Ferroglobus placidus DSM 10642                   |
| Nst1_051     | C1     | arCOG04180 | G         |        | Bifunctional fructose-1,6-bisphosphate aldolase/phosphatase FBPA/FBPase                                                              | 284162358            | 464         | Euryarchaeota                | Archaeoglobus profundus DSM 5631                 |
| Nst1_052     | C1     | arCOG04287 | J         | RPP1A  | Ribosomal protein L2E/L44/L45/RP1/RPP2                                                                                               | 41614996             | 113         | Nanoarchaeota                | Nanoarchaeum equitans Kin4-M                     |
| Nst1_053     | C1     | arCOG01159 | S         |        | Uncharacterized archaeal coiled-coil protein                                                                                         | 41615162             | 138         | Nanoarchaeota                | Nanoarchaeum equitans Kin4-M                     |
| Nst1_054     | C1     | arCOG01255 | J         | AlaS   | Alanyl-tRNA synthetase                                                                                                               | 359415684            | 504         | Euryarchaeota                | Candidatus Haloredivivus sp. G17                 |
| tRNA Leu_TAG |        |            |           |        | tRNA Leu_TAG                                                                                                                         |                      |             |                              |                                                  |
| Nst1_055     | C1     |            |           |        | Uncharacterized protein                                                                                                              |                      |             |                              |                                                  |
| Nst1_056     | C1     | arCOG05631 | S         |        | Uncharacterized conserved protein                                                                                                    | 17185888             | 218         | Crenarchaeota                | Pyrobaculum neutrophilum V24StA                  |
| Nst1_057     | C1     | arCOG02144 | L         | HHT1   | Histones H3 and H4                                                                                                                   | 41615077             | 93.6        | Nanoarchaeota                | Nanoarchaeum equitans Kin4-M                     |
| Nst1_058     | C1     | arCOG04088 | L         | DnaN   | DNA polymerase sliding clamp subunit (PCNA homolog)                                                                                  | 41615320             | 213         | Nanoarchaeota                | Nanoarchaeum equitans Kin4-M                     |
| Nst1_059     | C1     |            |           |        | Uncharacterized membrane protein                                                                                                     |                      |             |                              |                                                  |
| Nst1_060     | C1     | arCOG05555 | R         |        | Distinct helicase family with a unique C-terminal domain including a metal-binding cysteine cluster                                  | 289192195            | 649         | Euryarchaeota                | Methanocaldococcus sp. FS406-22                  |
| Nst1_061     | C1     | arCOG01347 | L         | CDC9   | ATP-dependent DNA ligase                                                                                                             | 332157848            | 424         | Euryarchaeota                | Pyrococcus sp. NA2                               |
| tRNA Ile_GAT |        |            |           |        | tRNA Ile_GAT                                                                                                                         |                      |             |                              |                                                  |
| Nst1_062     | C1     |            |           |        | Uncharacterized membrane protein                                                                                                     |                      |             |                              |                                                  |
| Nst1_063     | C1     | arCOG01863 | K         |        | Predicted transcription factor, homolog of eukaryotic MBF1                                                                           | 41614940             | 97.1        | Nanoarchaeota                | Nanoarchaeum equitans Kin4-M                     |
| Nst1_064     | C1     | arCOG03119 | S         |        | DeoA family membrane protein                                                                                                         | 15898947             | 82.4        | Crenarchaeota                | Sulfolobus solfataricus P2                       |
| Nst1_065     | C1     | arCOG00928 | L         |        | Endonuclease V homolog                                                                                                               | 312137236            | 172         | Euryarchaeota                | Methanothermobacter fervidus DSM 2088            |
| Nst1_066     | C1     | arCOG03055 | U         | SecD   | Preprotein translocase subunit SecD                                                                                                  | 41615222             | 203         | Nanoarchaeota                | Nanoarchaeum equitans Kin4-M                     |
| Nst1_067     | C1     | arCOG01894 | L         | Nfo    | Endonuclease IV                                                                                                                      | 156937880            | 309         | Crenarchaeota                | Ignicoccus hospitalis KIN4/I                     |
| Nst1_068     | C1     | arCOG00978 | J         | GCD14  | tRNA(L-methyladenosine) methyltransferase                                                                                            | 341582925            | 194         | Euryarchaeota                | Thermococcus sp. 4557                            |
| Nst1_069     | C1     | arCOG01997 | U         | MarC   | Multiple antibiotic transporter                                                                                                      | 336114953            | 107         | Firmicutes                   | Bacillus coagulans 2-6                           |
| Nst1_070     | C1     | arCOG04008 | J         | LysU   | Lysyl-tRNA synthetase (class II)                                                                                                     | 159041752            | 466         | Crenarchaeota                | Caldwellia maquilgensis IC-167                   |
| Nst1_071     | C1     | arCOG02055 | E         | PheA   | Phenylalanine dehydratase                                                                                                            | 332796453            | 168         | Crenarchaeota                | Acidianus hospitalis W1                          |
| Nst1_072     | C1     | arCOG01578 | P         | MgtA   | Cation transport ATPase                                                                                                              | 325968004            | 846         | Crenarchaeota                | Vulcaniseta moutnovskia 768-28                   |
| tRNA Ser_TGA |        |            |           |        | tRNA Ser_TGA                                                                                                                         |                      |             |                              |                                                  |
| Nst1_073     | C1     |            |           |        | Uncharacterized protein                                                                                                              |                      |             |                              |                                                  |
| Nst1_074     | C1     | arCOG00280 | L         |        | HcrA helicase                                                                                                                        | 15669760             | 151         | Euryarchaeota                | Methanocaldococcus jamaicensis DSM 2661          |
| Nst1_075     | C1     | arCOG01722 | J         | RpsM   | Ribosomal protein S13                                                                                                                | 41615251             | 211         | Nanoarchaeota                | Nanoarchaeum equitans Kin4-M                     |
| Nst1_076     | C1     | arCOG04239 | J         | RpsD   | Ribosomal protein S4 or related protein                                                                                              | 41615041             | 209         | Nanoarchaeota                | Nanoarchaeum equitans Kin4-M                     |
| Nst1_077     | C1     |            |           |        | Uncharacterized protein                                                                                                              |                      |             |                              |                                                  |
| Nst1_078     | C1     | arCOG00987 | J         | TruB   | Pseudouridine synthase                                                                                                               | 41615239             | 441         | Nanoarchaeota                | Nanoarchaeum equitans Kin4-M                     |
| Nst1_079     | C1     | arCOG04121 | L         | RnhB   | Ribonuclease HI                                                                                                                      | 14520734             | 185         | Euryarchaeota                | Pyrococcus abyssi GE5                            |
| Nst1_080     | C1     | arCOG02050 | R         |        | Predicted permease                                                                                                                   | 325968003            | 303         | Crenarchaeota                | Vulcaniseta moutnovskia 768-28                   |
| Nst1_081     | C1     | arCOG01171 | T         | RAD55  | RecA-superfamily ATPase implicated in signal transduction                                                                            | 119872031            | 423         | Crenarchaeota                | Pyrobaculum islandicum DSM 4184                  |
| Nst1_082     | C1     | arCOG01669 | S         |        | Uncharacterized conserved protein                                                                                                    | 15922146             | 82          | Crenarchaeota                | Sulfolobus tokodaii str. 7                       |
| Nst1_083     | C1     | arCOG00368 | L         | SbcC   | ATPase involved in DNA repair, SbcC                                                                                                  | 336122538            | 227         | Euryarchaeota                | Methanothermococcus okinawensis IH1              |
| Nst1_084     | C1     | arCOG00397 | L         | SbcD   | DNA repair exonuclease, SbcD                                                                                                         | 269864422            | 122         | Euryarchaeota                | Candidatus Parvarchaeum acidiphilum ARMAN-4      |
| Nst1_085     | C1     | arCOG01042 | J         |        | Exosome subunit, RNA binding protein with dsRBD fold                                                                                 | 332158107            | 57          | Euryarchaeota                | Pyrococcus sp. NA2                               |
| Nst1_086     | C1     |            |           |        | Uncharacterized protein                                                                                                              | 269864439            | 46.2        | Euryarchaeota                | Candidatus Parvarchaeum acidiphilum ARMAN-4      |
| Nst1_087     | C1     | arCOG01510 | L         | RFA1   | Single-stranded DNA-binding replication protein A (RPA), large (70 kD) subunit or related ssDNA-binding protein                      | 45358595             | 66.6        | Euryarchaeota                | Methanocaldococcus maripaludis S2                |
| Nst1_088     | C1     | arCOG01817 | N         | VirB11 | Type IV secretory pathway, VirB11 component, or related ATPase involved in archaeal flagella biosynthesis                            | 41614965             | 527         | Nanoarchaeota                | Nanoarchaeum equitans Kin4-M                     |
| Nst1_089     | C1     |            |           |        | Uncharacterized protein                                                                                                              |                      |             |                              |                                                  |
| Nst1_090     | C1     |            |           |        | Uncharacterized secreted protein                                                                                                     | 359417743            | 46.2        | Euryarchaeota                | Candidatus Haloredivivus sp. G17                 |
| Nst1_091     | C1     |            |           |        | Uncharacterized protein                                                                                                              | 41615234             | 64.7        | Nanoarchaeota                | Nanoarchaeum equitans Kin4-M                     |
| Nst1_092     | C1     | arCOG01257 | O         | GroL   | Chaperonin GroEL (HSP60 family)                                                                                                      | 41614938             | 699         | Nanoarchaeota                | Nanoarchaeum equitans Kin4-M                     |
| Nst1_093     | C1     | arCOG01038 | F         |        | Predicted nucleotide kinase (CMP/AMP kinase related)                                                                                 | 70606278             | 106         | Crenarchaeota                | Sulfolobus acidocaldarius DSM 639                |
| Nst1_094     | C1     | arCOG01688 | R         |        | Predicted transcriptional regulator, contains HTH and 4VR domain                                                                     | 41615238             | 88.6        | Nanoarchaeota                | Nanoarchaeum equitans Kin4-M                     |
| Nst1_095     | C1     |            |           |        | Uncharacterized protein                                                                                                              |                      |             |                              |                                                  |
| Nst1_096     | C1     | arCOG00991 | J         |        | tRNA modification protein, contains pre-PUA and PUA domains                                                                          | 312137491            | 121         | Euryarchaeota                | Methanothermobacter fervidus DSM 2088            |
| Nst1_097     | C1     | arCOG04471 | U         |        | Exosortase                                                                                                                           | 289192430            | 56.2        | Euryarchaeota                | Methanocaldococcus sp. FS406-22                  |
| Nst1_098     | C1     |            |           |        | Uncharacterized protein                                                                                                              |                      |             |                              |                                                  |
| Nst1_099     | C1     | arCOG01994 | S         | SpolIM | Uncharacterized membrane protein                                                                                                     | 384177774            | 73.2        | Firmicutes                   | Bacillus thuringiensis serovar finitimus YBT-020 |
| Nst1_100     | C1     | arCOG04151 | L         | DPHS   | Diphthamide biosynthetic methyltransferase                                                                                           | 374357923            | 162         | Euryarchaeota                | Methanothermobacter formicicus Mo-S-70           |
| Nst1_101     | C1     | arCOG04447 | L         |        | Archaeal DNA polymerase II, large subunit                                                                                            | 269886160            | 889         | Euryarchaeota                | Candidatus Parvarchaeum acidiphilum ARMAN-4      |
| Nst1_102     | C1     | arCOG00919 | L         |        | Holliday junction resolvase                                                                                                          | 333978847            | 52          | Firmicutes                   | Desulfotomaculum kuznetsovi DSM 6115             |
| Nst1_103     | C1     |            |           |        | rRNA (guanine(1405)-N(7))-methyltransferase                                                                                          | 41615326             | 105         | Nanoarchaeota                | Nanoarchaeum equitans Kin4-M                     |
| Nst1_104     | C1     | arCOG01676 | H         | Thif   | Dinucleotide-utilizing enzyme involved in molybdopterin and thiamine biosynthesis                                                    | 332796901            | 120         | Crenarchaeota                | Acidianus hospitalis W1                          |
| Nst1_105     | C1     | arCOG01308 | O         | Cdc48  | ATPase of the AAA+ class, CDC48 family                                                                                               | 41615258             | 91.3        | Nanoarchaeota                | Nanoarchaeum equitans Kin4-M                     |
| Nst1_106     | C1     | arCOG02155 | R         |        | Protein implicated in RNA metabolism, contains PRC-barrel domain                                                                     | 269886265            | 73.2        | Euryarchaeota                | Candidatus Parvarchaeum acidiphilum ARMAN-4      |
| Nst1_107     | C1     | arCOG04243 | J         | RpsI   | Ribosomal protein S9                                                                                                                 | 327311717            | 143         | Crenarchaeota                | Thermoproteus uzoniensis 768-20                  |
| Nst1_108     | C1     | arCOG04242 | J         | RplM   | Ribosomal protein L13                                                                                                                | 41615002             | 127         | Nanoarchaeota                | Nanoarchaeum equitans Kin4-M                     |
| Nst1_109     | C1     | arCOG00780 | J         | RPL18A | Ribosomal protein L18E                                                                                                               | 305626335            | 125         |                              |                                                  |

|               |    |            |   |        |                                                                                                                                                                                      |           |      |                              |                                               |
|---------------|----|------------|---|--------|--------------------------------------------------------------------------------------------------------------------------------------------------------------------------------------|-----------|------|------------------------------|-----------------------------------------------|
| Nst1_121      | C1 | arCOG04037 | L |        | Eukaryotic-type DNA primase, catalytic (small) subunit homolog, fused to HTH domain                                                                                                  | 229578659 | 370  | Crenarchaeota                | Sulfolobus islandicus Y.G.57.14               |
| Nst1_122      | C1 | arCOG00312 | O | AhpC   | Peroxiredoxin                                                                                                                                                                        | 288819142 | 224  | Crenarchaeota                | Hydrogenobacter thermophilus TK-6             |
| Nst1_123      | C1 |            |   |        | Uncharacterized protein                                                                                                                                                              |           |      |                              |                                               |
| Nst1_124      | C1 | arCOG01391 | M |        | Glycosyltransferase                                                                                                                                                                  | 350546624 | 94.7 | Tenericutes                  | Mycoplasma iowae 695                          |
| Nst1_125      | C1 | arCOG03214 | F |        | Thymidylate synthase-like protein fused to C-terminal DUF4346 domain and N-terminal domain homologous to N-terminal domain of tetrahydromethanopterin S-methyltransferase, subunit A | 119719856 | 276  | Crenarchaeota                | Thermofilum pendens Hrk 5                     |
| Nst1_126      | C1 |            |   |        | Uncharacterized protein                                                                                                                                                              |           |      |                              |                                               |
| Nst1_127      | C1 | arCOG01760 | E |        | Rhomboid family membrane associated serine protease                                                                                                                                  | 336121537 | 137  | Euryarchaeota                | Methanothermococcus okinawensis IH1           |
| Nst1_128      | C1 | arCOG02969 | E | PepN   | Aminopeptidase N                                                                                                                                                                     | 15920843  | 484  | Crenarchaeota                | Sulfolobus tokodaii str. 7                    |
| Nst1_129      | C1 | arCOG00810 | J | MetG   | Methionyl-tRNA synthetase                                                                                                                                                            | 41615241  | 335  | Nanoarchaeota                | Nanoarchaeum equitans Kin4-M                  |
| Nst1_130      | C1 | arCOG00033 | J | Trm5   | Wybutosine (yW) biosynthesis enzyme, Trm5 methyltransferase                                                                                                                          | 41615023  | 194  | Nanoarchaeota                | Nanoarchaeum equitans Kin4-M                  |
| Nst1_131      | C1 |            |   |        | Uncharacterized protein                                                                                                                                                              |           |      |                              |                                               |
| RNA Arg_TCT   | C1 |            |   |        | RNA Arg_TCT                                                                                                                                                                          |           |      |                              |                                               |
| RNA Pro_TGG   | C1 |            |   |        | RNA Pro_TGG                                                                                                                                                                          |           |      |                              |                                               |
| Nst1_132      | C1 | arCOG04070 | J | RplC   | Ribosomal protein L3                                                                                                                                                                 | 41615218  | 322  | Nanoarchaeota                | Nanoarchaeum equitans Kin4-M                  |
| Nst1_133      | C1 | arCOG04175 | J | RPL20A | Ribosomal protein L20A (L18A)                                                                                                                                                        | 296109184 | 65.5 | Euryarchaeota                | Methanocaldococcus infernus ME                |
| Nst1_134      | C1 | arCOG01341 | O | GIM5   | Predicted prefoldin, molecular chaperone implicated in de novo protein folding                                                                                                       | 304313970 | 56.6 | Euryarchaeota                | Methanothermococcus marburgensis str. Marburg |
| Nst1_135      | C1 | arCOG04176 | J | TIF6   | Translation initiation factor 6 (eIF-6)                                                                                                                                              | 15921658  | 71.6 | Crenarchaeota                | Sulfolobus tokodaii str. 7                    |
| Nst1_136      | C1 | arCOG02964 | N | FlaD   | Putative archaeal flagellar protein D/E                                                                                                                                              | 336476498 | 86.3 | Euryarchaeota                | Methanosalsum zhilinae DSM 4017               |
| Nst1_137      | C1 |            |   |        | Uncharacterized protein                                                                                                                                                              | 307594867 | 40.4 | Crenarchaeota                | Vulcanisaeta distributa DSM 14429             |
| Nst1_138      | C1 | arCOG04148 | N | FlaH   | Predicted ATPase involved in biogenesis of archaeal flagella                                                                                                                         | 315230972 | 171  | Euryarchaeota                | Thermococcus barophilus MP                    |
| Nst1_139      | C1 | arCOG01817 | N | VirB11 | Type IV secretory pathway, VirB11 component, or related ATPase involved in archaeal flagella biosynthesis                                                                            | 14521686  | 525  | Euryarchaeota                | Pyrococcus abyssi GE5                         |
| Nst1_140      | C1 | arCOG01886 | J | TyrS   | Tyrosyl-tRNA synthetase                                                                                                                                                              | 315230956 | 308  | Euryarchaeota                | Thermococcus barophilus MP                    |
| Nst1_141      | C1 |            |   |        | Uncharacterized protein                                                                                                                                                              |           |      |                              |                                               |
| Nst1_142      | C1 |            |   |        | Uncharacterized membrane protein                                                                                                                                                     |           |      |                              |                                               |
| Nst1_143      | C1 |            |   |        | Uncharacterized protein                                                                                                                                                              |           |      |                              |                                               |
| Nst1_144      | C1 |            |   |        | Uncharacterized protein                                                                                                                                                              |           |      |                              |                                               |
| Nst1_145      | C1 |            |   |        | Uncharacterized protein                                                                                                                                                              |           |      |                              |                                               |
| Nst1_146      | C1 |            |   |        | Uncharacterized protein                                                                                                                                                              |           |      |                              |                                               |
| Nst1_147      | C1 |            |   |        | Uncharacterized protein                                                                                                                                                              |           |      |                              |                                               |
| Nst1_148      | C1 | arCOG03166 | R |        | AAA+ superfamily ATPase fused to HTH and RecB nuclease domains                                                                                                                       | 10954496  | 466  | Euryarchaeota                | Methanocaldococcus jannaschii DSM 2661        |
| Nst1_149      | C1 | arCOG03521 | V |        | Type II restriction enzyme, methylase subunit                                                                                                                                        | 379033558 | 1443 | Crenarchaeota                | Pyrobaculum oganienae TEF                     |
| Nst1_150      | C1 | arCOG04049 | J | AnS    | Aspartyl/asparaginyl-tRNA synthetase                                                                                                                                                 | 375083802 | 306  | Euryarchaeota                | Thermococcus litoralis DSM 5473               |
| Nst1_151      | C1 | arCOG01580 | K | Lrp    | Transcriptional regulator, ldr family                                                                                                                                                | 119718936 | 129  | Crenarchaeota                | Thermofilum pendens Hrk 5                     |
| Nst1_152      | C1 |            |   |        | Predicted AAA family ATPase                                                                                                                                                          |           |      |                              |                                               |
| Nst1_153      | C1 |            |   |        | Uncharacterized membrane protein                                                                                                                                                     |           |      |                              |                                               |
| Nst1_154      | C1 |            |   |        | Uncharacterized membrane protein                                                                                                                                                     | 332797585 | 56.2 | Crenarchaeota                | Acidilobus hospitalis W1                      |
| Nst1_155      | C1 | arCOG06218 | S |        | Uncharacterized membrane protein                                                                                                                                                     | 25513503  | 89.7 | Euryarchaeota                | Candidatus Micrarchaeum acidiphilum ARMAN-2   |
| Nst1_156      | C1 | arCOG04574 | S | LemA   | Uncharacterized conserved protein                                                                                                                                                    | 255513504 | 208  | Euryarchaeota                | Candidatus Micrarchaeum acidiphilum ARMAN-2   |
| Nst1_157      | C1 | arCOG03769 | S |        | Uncharacterized conserved membrane protein                                                                                                                                           | 159899319 | 76.3 | Crenarchaeota                | Sulfolobus solfataricus P2                    |
| Nst1_158      | C1 | arCOG04020 | C | GalT   | Galactose-1-phosphate uridylyltransferase                                                                                                                                            | 288932824 | 99.2 | Euryarchaeota                | Ferroglobus placidus DSM 10642                |
| Nst1_159      | C1 |            |   |        | Uncharacterized protein                                                                                                                                                              |           |      |                              |                                               |
| Nst1_160      | C1 | arCOG01563 | K | RleE   | Cytosolic/transitional repressor of toxin-antitoxin stability system                                                                                                                 | 38433983  | 47.8 | Crenarchaeota                | Sulfolobus solfataricus 982                   |
| Nst1_161      | C1 | arCOG04007 | J | AnS    | Aspartyl/asparaginyl-tRNA synthetase                                                                                                                                                 | 218883641 | 457  | Crenarchaeota                | Desulfurococcus kamchakensis 1221n            |
| Nst1_162      | C1 | arCOG01674 | C | AcyP   | Acylphosphatase                                                                                                                                                                      | 346224783 | 88.2 | Bacteroidetes/Chlorobi group | Anaerophaga thermalophila DSM 12881           |
| Nst1_163      | C1 |            |   |        | Uncharacterized protein                                                                                                                                                              |           |      |                              |                                               |
| Nst1_164      | C1 |            |   |        | RNA Val_GAC                                                                                                                                                                          |           |      |                              |                                               |
| Nst1_165      | C1 | arCOG04332 | J | Ybak   | Cys-RNA(Pro)/Cys-RNA(Cys) deacylase, ybak family                                                                                                                                     | 70606921  | 71.2 | Crenarchaeota                | Sulfolobus acidocaldarius DSM 639             |
| Nst1_166      | C1 | arCOG01268 | K | RpoZ   | DNA-directed RNA polymerase, subunit K/omega                                                                                                                                         | 298205310 | 72.4 | Nanoarchaeota                | Nanoarchaeum equitans Kin4-M                  |
| Nst1_167      | C1 | arCOG01574 | J |        | RNase PH-related exonuclease                                                                                                                                                         | 307594959 | 187  | Crenarchaeota                | Vulcanisaeta distributa DSM 14429             |
| Nst1_168      | C1 |            |   |        | Uncharacterized protein                                                                                                                                                              |           |      |                              |                                               |
| Nst1_169      | C1 |            |   |        | predicted cell surface protein                                                                                                                                                       |           |      |                              |                                               |
| Nst1_170      | C1 |            |   |        | Uncharacterized membrane protein                                                                                                                                                     |           |      |                              |                                               |
| Nst1_171      | C1 |            |   |        | Uncharacterized membrane protein                                                                                                                                                     |           |      |                              |                                               |
| Nst1_172      | C1 | arCOG00557 | R | Lhr    | Lhr-like helicase                                                                                                                                                                    | 269987062 | 305  | Euryarchaeota                | Candidatus Parvarcheum acidiphilum ARMAN-4    |
| Nst1_173      | C1 |            |   |        | Uncharacterized membrane protein                                                                                                                                                     |           |      |                              |                                               |
| Nst1_174      | C2 | arCOG01527 | L | TopA   | Topoisomerase IA                                                                                                                                                                     | 223476951 | 410  | Euryarchaeota                | Thermococcus sp. AM4                          |
| Nst1_175      | C2 | arCOG04347 | Q |        | Predicted permease fused to SAM-dependent methyltransferase                                                                                                                          | 208605314 | 78.2 |                              |                                               |
| Nst1_176      | C1 | arCOG01695 | K |        | Predicted RNA-binding protein homologous to eukaryotic snRNP                                                                                                                         | 290559894 | 121  | Euryarchaeota                | Candidatus Parvarcheum acidiphilum ARMAN-5    |
| Nst1_177      | C2 | arCOG07442 | S |        | Uncharacterized conserved protein                                                                                                                                                    | 119719007 | 66.6 | Crenarchaeota                | Thermofilum pendens Hrk 5                     |
| Nst1_178      | C2 | arCOG00187 | R |        | Predicted ATPase, RNase L inhibitor (RLI) homolog                                                                                                                                    | 41615088  | 531  | Nanoarchaeota                | Nanoarchaeum equitans Kin4-M                  |
| Nst1_179      | C2 | arCOG04116 | R |        | ATPase (PIII family)                                                                                                                                                                 | 41614855  | 476  | Nanoarchaeota                | Nanoarchaeum equitans Kin4-M                  |
| Nst1_180      | C2 | arCOG04111 | K | RPB11  | DNA-directed RNA polymerase, subunit L                                                                                                                                               | 15922592  | 59.7 | Crenarchaeota                | Sulfolobus tokodaii str. 7                    |
| Nst1_181      | C2 | arCOG04455 | L | HSY2   | Archaeal DNA polymerase II, small subunit/DNA polymerase delta, subunit B                                                                                                            | 41615034  | 320  | Nanoarchaeota                | Nanoarchaeum equitans Kin4-M                  |
| Nst1_182      | C2 | arCOG00467 | L | CDC6   | Cdc6-related protein, AAA superfamily ATPase                                                                                                                                         | 385805899 | 176  | Crenarchaeota                | Ferriplasma acidophilum DSM 14429             |
| Nst1_183      | C2 | arCOG04219 | R |        | Possible nuclease of RNase H fold, RuvC/Rag family                                                                                                                                   | 385805339 | 113  | Crenarchaeota                | Ferriplasma acidophilum DSM 14429             |
| Nst1_184      | C2 | arCOG00782 | J | RpsN   | Ribosomal protein S14                                                                                                                                                                | 41615021  | 69.7 | Nanoarchaeota                | Nanoarchaeum equitans Kin4-M                  |
| Nst1_185      | C2 | arCOG04091 | J | RpsH   | Ribosomal protein S8                                                                                                                                                                 | 41615066  | 121  | Nanoarchaeota                | Nanoarchaeum equitans Kin4-M                  |
| Nst1_186      | C2 |            |   |        | Uncharacterized protein                                                                                                                                                              | 339756871 | 43.5 | Euryarchaeota                | Candidatus Nanosalarium sp. J07AB56           |
| Nst1_187      | C2 | arCOG04088 | J | RplR   | Ribosomal protein L18                                                                                                                                                                | 41614871  | 278  | Nanoarchaeota                | Nanoarchaeum equitans Kin4-M                  |
| Nst1_188      | C2 | arCOG03167 | R |        | Predicted ATPase (AAA+ superfamily)                                                                                                                                                  | 28859272  | 255  | Euryarchaeota                | Methanobrevibacter ruminantium M1             |
| Nst1_189      | C2 | arCOG02841 | V | MdbB   | ABC-type multidrug transport system, ATPase and permease component                                                                                                                   | 15921353  | 750  | Crenarchaeota                | Sulfolobus tokodaii str. 7                    |
| Nst1_190      | C2 | arCOG02218 | V |        | RNH/CopG DNA binding protein                                                                                                                                                         | 124028348 | 48.5 | Crenarchaeota                | Hyperthermus butylicus DSM 5456               |
| Nst1_191      | C2 | arCOG00729 | V |        | PHN domain containing protein                                                                                                                                                        | 385727254 | 84.7 | Crenarchaeota                | Sulfolobus islandicus HVE104                  |
| Nst1_D192     | C2 |            |   |        |                                                                                                                                                                                      |           |      |                              |                                               |
| trRNA Ser_GGA | C2 |            |   |        | trRNA Ser_GGA                                                                                                                                                                        |           |      |                              |                                               |
| Nst1_193      | C2 | arCOG00367 | L |        | NurA 5'-3' nuclease                                                                                                                                                                  | 124506175 | 48.1 |                              |                                               |
| Nst1_194      | C2 |            |   |        | trRNA His_GTG                                                                                                                                                                        |           |      |                              |                                               |
| Nst1_195      | C2 | arCOG01824 | N | FlaF   | Putative archaeal flagellar protein F                                                                                                                                                | 256811149 | 50.1 | Euryarchaeota                | Candidatus Parvarcheum acidiphilum ARMAN-4    |
| Nst1_196      | C2 | arCOG01822 | N | FlaG   | Putative archaeal flagellar protein G                                                                                                                                                | 304611354 | 67.8 | Euryarchaeota                | Methanocaldococcus fervens AG86               |
| Nst1_197      | C2 | arCOG01719 | J | GateE  | Archaeal Glu-tRNA-Gln amidotransferase subunit E (contains GAD domain)                                                                                                               | 41615038  | 330  | Nanoarchaeota                | Halobacterium sp. DL1                         |
| Nst1_198      | C2 | arCOG01728 | R |        | Predicted dioxygenase                                                                                                                                                                | 305663860 | 174  | Crenarchaeota                | Nanoarchaeum equitans Kin4-M                  |
| Nst1_199      | C2 | arCOG01832 | O | IbpA   | Molecular chaperone (HSP20 family)                                                                                                                                                   | 288930756 | 100  | Euryarchaeota                | Ferroglobus placidus DSM 10642                |
| Nst1_200      | C2 | arCOG00352 | R |        | Predicted GTPase                                                                                                                                                                     | 25610052  | 213  | Euryarchaeota                | Methanocaldococcus fervens AG86               |
| Nst1_201      | C2 | arCOG01145 | R |        | Icc family phosphoesterase                                                                                                                                                           | 150400474 | 84.7 | Euryarchaeota                | Methanosalsum aelicus Nankai-3                |
| Nst1_202      | C2 | arCOG03713 | F | NrdA   | Ribonucleotide reductase class II (contains intein)                                                                                                                                  | 14590272  | 1208 | Euryarchaeota                | Pyrococcus horikoshii OT3                     |
| trRNA Ala_TGC | C2 |            |   |        | trRNA Ala_TGC                                                                                                                                                                        |           |      |                              |                                               |
| trRNA Leu_CAA | C2 |            |   |        | trRNA Leu_CAA                                                                                                                                                                        |           |      |                              |                                               |
| Nst1_203      | C2 | arCOG01696 | G |        | 2,3-bisphosphoglycerate-independent phosphoglycerate mutase                                                                                                                          | 261402895 | 105  | Euryarchaeota                | Methanocaldococcus vulcanius M7               |
| Nst1_204      | C2 | arCOG00477 | J | RpsC   | Ribosomal protein S3                                                                                                                                                                 | 152006885 | 139  | Nanoarchaeota                | Nanoarchaeum equitans Kin4-M                  |
| Nst1_205      | C2 | arCOG04098 | J | RplV   | Ribosomal protein L22                                                                                                                                                                | 41614997  | 97.1 | Nanoarchaeota                | Nanoarchaeum equitans Kin4-M                  |
| Nst1_206      | C2 |            |   |        | Uncharacterized protein                                                                                                                                                              |           |      |                              |                                               |
| Nst1_207      | C2 |            |   |        | Uncharacterized protein                                                                                                                                                              |           |      |                              |                                               |
| Nst1_208      | C2 |            |   |        | Uncharacterized protein                                                                                                                                                              |           |      |                              |                                               |
| trRNA Glu_CTC | C2 |            |   |        | trRNA Glu_CTC                                                                                                                                                                        |           |      |                              |                                               |
| Nst1_209      | C2 |            |   |        | Metal binding protein, Fragment of surface protease of transglutaminase family                                                                                                       | 57641827  | 98.6 | Euryarchaeota                | Thermococcus kodakarensis KOD1                |
| Nst1_210      | C2 |            |   |        | Uncharacterized protein                                                                                                                                                              |           |      |                              |                                               |
| Nst1_211      | C2 | arCOG04089 | J | RPL19A | Ribosomal protein L19E                                                                                                                                                               | 41615168  | 174  | Nanoarchaeota                | Nanoarchaeum equitans Kin4-M                  |
| Nst1_212      | C2 | arCOG00779 | J | RplD   | Ribosomal protein L15                                                                                                                                                                | 289597171 | 100  | Euryarchaeota                | Acidilobus fundum boonei T469                 |
| Nst1_213      | C2 | arCOG00404 | J | HIS    | Histidyl-tRNA synthetase                                                                                                                                                             | 41614900  | 436  | Nanoarchaeota                | Nanoarchaeum equitans Kin4-M                  |
| Nst1_214      | C2 | arCOG00894 | M | WcaA   | Glycosyltransferase                                                                                                                                                                  | 170289827 | 280  | Korarchaeota                 | Candidatus Korarchaeum cryptophilum OPF8      |
| Nst1_215      | C2 | arCOG04126 | J | RPL37A | Ribosomal protein L37E                                                                                                                                                               | 14520858  | 69.3 | Euryarchaeota                | Pyrococcus abyssi GE5                         |
| Nst1_216      | C2 | arCOG04087 | J | RpsE   | Ribosomal protein S5                                                                                                                                                                 | 41615177  | 271  | Nanoarchaeota                | Nanoarchaeum equitans Kin4-M                  |
| Nst1_217      | C2 | arCOG04086 | J | RpmD   | Ribosomal protein L30                                                                                                                                                                | 240104038 | 159  | Euryarchaeota                | Thermococcus gammatolerans EJ3                |
| Nst1_218      | C2 | arCOG04113 | J | RplP   | Ribosomal protein L16A/E/L16                                                                                                                                                         | 41615235  | 146  | Nanoarchaeota                | Nanoarchaeum equitans Kin4-M                  |
| Nst1_219      | C2 | arCOG02900 | R |        | domain                                                                                                                                                                               | 288932694 | 82   | Euryarchaeota                | Ferroglobus placidus DSM 10642                |
| Nst1_220      | C2 | arCOG00438 | R |        | AAA family ATPase                                                                                                                                                                    | 41615187  | 344  | Nanoarchaeota                | Nanoarchaeum equitans Kin4-M                  |
| Nst1_221      | C2 | arCOG02293 | R |        | HAD superfamily hydrolase                                                                                                                                                            | 331004269 | 124  | Firmicutes                   | Lachnospiraceae oral taxon 107 str. F0167     |
| Nst1_222      | C2 | arCOG04112 | J | DPH2   | Diphthamycin synthase subunit DPH2                                                                                                                                                   | 269986418 | 79.3 | Euryarchaeota                | Candidatus Parvarcheum acidiphilum ARMAN-4    |
| Nst1_223      | C2 | arCOG00589 | R |        | Ribosomal protein S19                                                                                                                                                                | 41614915  | 151  | Nanoarchaeota                | Nanoarchaeum equitans Kin4-M                  |
| Nst1_224      | C2 |            |   |        | Uncharacterized protein                                                                                                                                                              |           |      |                              |                                               |
| Nst1_225      | C2 |            |   |        | Uncharacterized protein                                                                                                                                                              |           |      |                              |                                               |
| RNAse P RNA   | C2 |            |   |        | RNAse P RNA                                                                                                                                                                          |           |      |                              |                                               |
| Nst1_226      | C2 | arCOG00402 | J | ProS   | Prolyl-tRNA synthetase                                                                                                                                                               | 41615004  | 536  | Nanoarchaeota                | Nanoarchaeum equitans Kin4-M                  |
| 16S_rRNA      | C2 |            |   |        | 16S_rRNA                                                                                                                                                                             |           |      |                              |                                               |
| Nst1_227      | C2 | arCOG01817 | N | VirB11 | Type IV secretory pathway, VirB11 component, or related ATPase involved in archaeal flagella biosynthesis                                                                            | 339757252 | 412  | Euryarchaeota                | Candidatus Nanosalarium sp. J07AB56           |
| Nst1_228      | C2 | arCOG01808 | N | TadC   | Filipilus assembly protein TadC                                                                                                                                                      | 339757248 | 98.6 | Crenarchaeota                | Candidatus Nanosalarium sp. J07AB56           |
| Nst1_229      | C2 | arCOG01808 | N | TadC   | Filipilus assembly protein TadC                                                                                                                                                      | 329765281 | 117  | Thaumarchaeota               | Candidatus Nitrososalarium limnia SF81        |
| Nst1_230      | C2 | arCOG04099 | J | RpsS   | Ribosomal protein S19                                                                                                                                                                | 41615264  | 149  | Nanoarchaeota                | Nanoarchaeum equitans Kin4-M                  |

|              |    |            |   |                                                                                                           |           |      |                                              |                                                        |  |
|--------------|----|------------|---|-----------------------------------------------------------------------------------------------------------|-----------|------|----------------------------------------------|--------------------------------------------------------|--|
| Nst1_240     | C2 |            |   | Uncharacterized protein                                                                                   | 291280786 | 60.1 |                                              |                                                        |  |
| Nst1_241     | C2 |            |   | Uncharacterized protein                                                                                   | 150401409 | 51.6 | Euryarchaeota                                | Methanococcus aeolicus Nankai-3                        |  |
| Nst1_242     | C2 | arCOG01575 | J | Rph                                                                                                       | 41615042  | 218  | Nanoarchaeota                                | Nanoarchaeum equitans Kin4-M                           |  |
| Nst1_243     | C2 | arCOG00678 | J | RRP4                                                                                                      | 326422490 | 134  | Euryarchaeota                                | Candidatus Parvarchaemum acidophilus ARMAN-5_5-way F5' |  |
| Nst1_244     | C2 | arCOG00601 | R |                                                                                                           | 11498727  | 140  | Euryarchaeota                                | Archaeoglobus fulgidus DSM 4304                        |  |
| Nst1_245     | C2 |            |   | Uncharacterized membrane protein                                                                          | 41615012  | 50.4 | Nanoarchaeota                                | Nanoarchaeum equitans Kin4-M                           |  |
| Nst1_246     | C2 |            |   | Uncharacterized membrane protein                                                                          | 41615012  | 66.6 | Nanoarchaeota                                | Nanoarchaeum equitans Kin4-M                           |  |
| Nst1_247     | C2 |            |   | Uncharacterized membrane protein                                                                          | 289191932 | 55.8 | Euryarchaeota                                | Methanocaldococcus sp. FS406-22                        |  |
| Nst1_248     | C2 | arCOG00349 | C | Fer                                                                                                       | 158431531 | 68.6 | Euryarchaeota                                | Pyrococcus furiosus DSM 3638                           |  |
| Nst1_249     | C2 | arCOG00793 | R |                                                                                                           | 41615331  | 107  | Nanoarchaeota                                | Nanoarchaeum equitans Kin4-M                           |  |
| Nst1_250     | C2 | arCOG01695 | K |                                                                                                           | 296109918 | 213  | Euryarchaeota                                | Methanocaldococcus infernus ME                         |  |
| Nst1_251     | C2 | arCOG00799 | M |                                                                                                           | 35897992  | 69.7 | Crenarchaeota                                | Sulfolobus solifarius P2                               |  |
| Nst1_252     | C2 | arCOG00900 | F | GuaA                                                                                                      | 284161793 | 107  | Euryarchaeota                                | Archaeoglobus profundus DSM 5631                       |  |
| Nst1_253     | C2 | arCOG00035 | R |                                                                                                           | 119720014 | 214  | Crenarchaeota                                | Thermofilum pendens Hrk 5                              |  |
| Nst1_254     | C2 |            |   | Uncharacterized protein                                                                                   | 340345368 | 72.8 | Thaumarchaeota                               | Candidatus Nitrosarchaeum korensis MY1                 |  |
| Nst1_255     | C2 | arCOG01667 | S |                                                                                                           | 41615324  | 918  | Nanoarchaeota                                | Nanoarchaeum equitans Kin4-M                           |  |
| Nst1_256     | C2 | arCOG01359 | J | FusA                                                                                                      | 156937280 | 35.4 | Crenarchaeota                                | Ignicoccus hospitalis KIN4/I                           |  |
| Nst1_257     | C2 |            |   | Zn finger protein                                                                                         | 91772494  | 120  | Euryarchaeota                                | Methanocaldococcus burtoni DSM 6242                    |  |
| Nst1_258     | C2 | arCOG01808 | N | TadC                                                                                                      | 339757252 | 385  | Euryarchaeota                                | Candidatus Nanoalinarum sp. J07AB56                    |  |
| Nst1_259     | C2 | arCOG01817 | N | VirB11                                                                                                    |           |      |                                              |                                                        |  |
| Nst1_260     | C2 |            |   | Type IV secretory pathway, VirB11 component, or related ATPase involved in archaeal flagella biosynthesis | 41615250  | 412  | Nanoarchaeota                                | Nanoarchaeum equitans Kin4-M                           |  |
| Nst1_261     | C2 |            |   | Uncharacterized protein                                                                                   | 29058928  | 119  | Euryarchaeota                                | Candidatus Parvarchaemum acidophilus ARMAN-5           |  |
| Nst1_262     | C2 |            |   | Uncharacterized protein                                                                                   | 41615203  | 427  | Nanoarchaeota                                | Nanoarchaeum equitans Kin4-M                           |  |
| Nst1_263     | C2 | arCOG00546 | J |                                                                                                           | 289549001 | 318  | Aquificae                                    | Thermococcus abuss DSM 14484                           |  |
| Nst1_264     | C2 | arCOG00546 | J |                                                                                                           | 41614884  | 369  | Nanoarchaeota                                | Nanoarchaeum equitans Kin4-M                           |  |
| Nst1_265     | C2 | arCOG00405 | J | GRS1                                                                                                      | 284997231 | 140  | Crenarchaeota                                | Sulfolobus islandicus L.D.8.5                          |  |
| Nst1_266     | C2 | arCOG00421 | G | GlpP                                                                                                      | 342306582 | 86.7 | Crenarchaeota                                | Sulfolobus tokodaii str. 7                             |  |
| Nst1_267     | C2 | arCOG04050 | L | Exo                                                                                                       | 327310083 | 293  | Crenarchaeota                                | Thermoproteus uzoniensis 768-20                        |  |
| Nst1_268     | C2 | arCOG00729 | V |                                                                                                           | 254168839 | 209  | Euryarchaeota                                | Acidilobum profundum boonei T469                       |  |
| Nst1_269     | C2 | arCOG02218 | V |                                                                                                           | 375083852 | 122  | Euryarchaeota                                | Thermococcus litoralis DSM 5473                        |  |
| Nst1_270     | C2 | arCOG03714 | F | NrdD                                                                                                      | 148643003 | 38.5 | Euryarchaeota                                | Methanobrevibacter smithii ATCC 35061                  |  |
| Nst1_271     | C2 | arCOG01254 | R |                                                                                                           |           |      |                                              |                                                        |  |
| Nst1_272     | C2 | arCOG04214 | S |                                                                                                           |           |      |                                              |                                                        |  |
| Nst1_273     | C2 |            |   | Uncharacterized protein                                                                                   |           |      |                                              |                                                        |  |
| trNA Ala_CGC | C2 |            |   | trNA Ala_CGC                                                                                              |           |      |                                              |                                                        |  |
| Nst1_274     | C2 |            |   | Uncharacterized protein                                                                                   |           |      |                                              |                                                        |  |
| Nst1_275     | C2 | arCOG04167 | J | RPL14A                                                                                                    | 41614973  | 115  | Nanoarchaeota                                | Nanoarchaeum equitans Kin4-M                           |  |
| Nst1_276     | C2 | arCOG04168 | J | RPL34A                                                                                                    | 218884461 | 83.6 | Crenarchaeota                                | Desulfurococcus kamohakensis 1221n                     |  |
| Nst1_277     | C2 | arCOG02673 | U |                                                                                                           | 145482617 | 44.7 |                                              |                                                        |  |
| Nst1_278     | C2 | arCOG04169 | U | SecY                                                                                                      | 284162437 | 238  | Euryarchaeota                                | Archaeoglobus profundus DSM 5631                       |  |
| Nst1_279     | C2 | arCOG01895 | R |                                                                                                           | 41615503  | 89   | Nanoarchaeota                                | Nanoarchaeum equitans Kin4-M                           |  |
| Nst1_280     | C2 |            |   | Uncharacterized protein                                                                                   | 290559000 | 73.6 | Candidatus Parvarchaemum acidophilus ARMAN-5 |                                                        |  |
| Nst1_281     | C2 | arCOG00769 | R | ThiJ                                                                                                      | 41615133  | 50.8 | Nanoarchaeota                                | Nanoarchaeum equitans Kin4-M                           |  |
| Nst1_282     | C2 |            |   | Uncharacterized membrane protein                                                                          |           |      |                                              |                                                        |  |
| trNA Ser_CGA | C2 |            |   | trNA Ser_CGA                                                                                              |           |      |                                              |                                                        |  |
| Nst1_283     | C2 | arCOG01887 | J | TrpS                                                                                                      | 41614911  | 507  | Nanoarchaeota                                | Nanoarchaeum equitans Kin4-M                           |  |
| Nst1_284     | C2 | arCOG04252 | J | RibK                                                                                                      | 150401583 | 216  | Nanoarchaeota                                | Methanococcus aeolicus Nankai-3                        |  |
| Nst1_285     | C2 | arCOG04318 | J |                                                                                                           | 159041056 | 184  | Crenarchaeota                                | Caldwriga maquilingsiensis IC-167                      |  |
| Nst1_286     | C2 | arCOG04064 | M |                                                                                                           | 41615327  | 160  | Nanoarchaeota                                | Nanoarchaeum equitans Kin4-M                           |  |
| Nst1_287     | C2 | arCOG04049 | J | RPL40A                                                                                                    | 26986484  | 50.8 | Candidatus Parvarchaemum acidophilum ARMAN-4 |                                                        |  |
| Nst1_288     | C2 | arCOG01736 | J | LigT                                                                                                      | 307594884 | 119  | Euryarchaeota                                | Vulcanisaeta distributa DSM 14429                      |  |
| Nst1_289     | C2 | arCOG01744 | R |                                                                                                           | 168211063 | 63.9 | Firmicutes                                   | Clostridium perfringens B str. ATCC 3626               |  |
| Nst1_289     | C2 |            |   | Membrane-bound metal-dependent hydrolase                                                                  |           |      |                                              |                                                        |  |
| Nst1_290     | C2 |            |   | Uncharacterized protein                                                                                   |           |      |                                              |                                                        |  |
| Nst1_291     | C2 | arCOG04228 | J | pth2                                                                                                      | 16081275  | 134  | Euryarchaeota                                | Thermoplasma acidophilum DSM 1728                      |  |
| Nst1_292     | C2 |            |   | Uncharacterized protein                                                                                   |           |      |                                              |                                                        |  |
| Nst1_293     | C2 | arCOG04345 | J | RPR2                                                                                                      | 390938938 | 80.5 | Crenarchaeota                                | Desulfurococcus fermentans DSM 16532                   |  |
| Nst1_294     | C2 |            |   | 5S_rRNA                                                                                                   |           |      |                                              |                                                        |  |
| Nst1_295     | C2 |            |   | Uncharacterized protein                                                                                   |           |      |                                              |                                                        |  |
| Nst1_296     | C2 | arCOG02960 | R |                                                                                                           | 41614823  | 152  | Nanoarchaeota                                | Nanoarchaeum equitans Kin4-M                           |  |
| Nst1_297     | C2 | arCOG04096 | J | RpsQ                                                                                                      | 347524205 | 127  | Crenarchaeota                                | Pyrolobus fumarii 1A                                   |  |
| Nst1_298     | C2 | arCOG04095 | J | RplN                                                                                                      | 41614889  | 166  | Nanoarchaeota                                | Nanoarchaeum equitans Kin4-M                           |  |
| Nst1_299     | C2 | arCOG04094 | J | RplK                                                                                                      | 41615050  | 126  | Nanoarchaeota                                | Nanoarchaeum equitans Kin4-M                           |  |
| Nst1_300     | C2 | arCOG04093 | J | RPS4A                                                                                                     | 41615262  | 169  | Nanoarchaeota                                | Nanoarchaeum equitans Kin4-M                           |  |
| Nst1_301     | C2 | arCOG04092 | J | RplE                                                                                                      | 70606399  | 194  | Crenarchaeota                                | Sulfolobus acidocaldarius DSM 639                      |  |
| Nst1_302     | C2 | arCOG04090 | J | RplF                                                                                                      | 124028171 | 140  | Crenarchaeota                                | Hyperthermus butylicus DSM 5456                        |  |
| Nst1_303     | C2 | arCOG00781 | J | RPL32                                                                                                     | 20094661  | 129  | Euryarchaeota                                | Methanopyrus kandleri AV 19                            |  |
| Nst1_304     | C2 |            |   | Uncharacterized protein                                                                                   |           |      |                                              |                                                        |  |
| Nst1_305     | C2 |            |   | Uncharacterized protein                                                                                   |           |      |                                              |                                                        |  |
| Nst1_306     | C2 | arCOG01486 | L |                                                                                                           | 41615228  | 43.9 | Nanoarchaeota                                | Nanoarchaeum equitans Kin4-M                           |  |
| Nst1_307     | C2 | arCOG03013 | L | PR12                                                                                                      | 374635331 | 61.2 | Euryarchaeota                                | Methanoterris formicicus Mo-S-70                       |  |
| Nst1_308     | C2 | arCOG00675 | K | RBP7                                                                                                      | 41615183  | 283  | Nanoarchaeota                                | Nanoarchaeum equitans Kin4-M                           |  |
| Nst1_309     | C2 | arCOG04077 | K | Spn4                                                                                                      | 333987965 | 171  | Euryarchaeota                                | Methanobacterium sp. SWAN-1                            |  |
| Nst1_310     | C2 | arCOG04302 | J | GlnS                                                                                                      | 41615025  | 79.3 | Nanoarchaeota                                | Nanoarchaeum equitans Kin4-M                           |  |
| Nst1_311     | C2 | arCOG01342 | O | GimC                                                                                                      | 41615091  | 468  | Nanoarchaeota                                | Nanoarchaeum equitans Kin4-M                           |  |
| Nst1_312     | C2 | arCOG02263 | D |                                                                                                           | 14601406  | 76.3 | Crenarchaeota                                | Aeropyrum pernix K1                                    |  |
| Nst1_313     | C2 | arCOG04265 | R |                                                                                                           | 41615068  | 87.8 | Nanoarchaeota                                | Nanoarchaeum equitans Kin4-M                           |  |
| Nst1_314     | C2 |            |   | C4-type Zn-finger protein, SepF homolog                                                                   | 156937893 | 95.1 | Crenarchaeota                                | Ignicoccus hospitalis KIN4/I                           |  |
| Nst1_315     | C2 | arCOG04341 | K | RPC10                                                                                                     |           |      |                                              |                                                        |  |
| Nst1_316     | C2 | arCOG04208 | J | RPL3A                                                                                                     | 333910832 | 57   | Euryarchaeota                                | Methanoterris igneus Kcl 5                             |  |
| Nst1_317     | C2 | arCOG01344 | J | RPS19A                                                                                                    | 41614833  | 78.6 | Nanoarchaeota                                | Nanoarchaeum equitans Kin4-M                           |  |
| Nst1_318     | C2 |            |   | Uncharacterized protein                                                                                   | 161511236 | 148  | Nanoarchaeota                                | Nanoarchaeum equitans Kin4-M                           |  |
| Nst1_319     | C2 |            |   | Predicted membrane or secreted protein                                                                    |           |      |                                              |                                                        |  |
| Nst1_320     | C2 |            |   | Uncharacterized protein                                                                                   |           |      |                                              |                                                        |  |
| Nst1_321     | C2 |            |   | Predicted membrane or secreted protein                                                                    |           |      |                                              |                                                        |  |
| Nst1_322     | C2 | arCOG00284 | L |                                                                                                           | 290558807 | 386  | Euryarchaeota                                | Candidatus Parvarchaemum acidophilus ARMAN-5           |  |
| trNA Gly_TCC | C2 |            |   | trNA Gly_TCC                                                                                              |           |      |                                              |                                                        |  |
| trNA Ala_GGC | C2 |            |   | trNA Ala_GGC                                                                                              |           |      |                                              |                                                        |  |
| Nst1_323     | C2 |            |   | Uncharacterized protein                                                                                   |           |      |                                              |                                                        |  |
| Nst1_324     | C2 | arCOG00350 | R |                                                                                                           | 163785853 | 173  | Aquificae                                    | Hydrogenivirga sp. 128-F.R1-1                          |  |
| Nst1_325     | C2 | arCOG04142 | O | DYS1                                                                                                      | 41615189  | 433  | Nanoarchaeota                                | Nanoarchaeum equitans Kin4-M                           |  |
| Nst1_326     | C2 | arCOG00810 | J | MetG                                                                                                      | 240103568 | 144  | Euryarchaeota                                | Thermococcus gammatolerans EJ3                         |  |
| Nst1_327     | C2 | arCOG01924 | E | AnsB                                                                                                      | 341581725 | 323  | Euryarchaeota                                | Thermococcus sp. 4557                                  |  |
| Nst1_328     | C2 |            |   | Uncharacterized protein                                                                                   |           |      |                                              |                                                        |  |
| Nst1_329     | C2 | arCOG02201 | D | FzZ                                                                                                       | 290559494 | 326  | Euryarchaeota                                | Candidatus Parvarchaemum acidophilus ARMAN-5           |  |
| Nst1_330     | C2 | arCOG01347 | L | CDC9                                                                                                      | 41615291  | 672  | Nanoarchaeota                                | Nanoarchaeum equitans Kin4-M                           |  |
| Nst1_331     | C2 | arCOG02037 | K |                                                                                                           | 41614895  | 202  | Nanoarchaeota                                | Nanoarchaeum equitans Kin4-M                           |  |
| Nst1_332     | C2 | arCOG00288 | C | NfnB                                                                                                      | 147921471 | 126  | Euryarchaeota                                | Methanocella arvozzyae MRE50                           |  |
| Nst1_333     | C2 |            |   | Uncharacterized membrane protein                                                                          |           |      |                                              |                                                        |  |
| Nst1_334     | C2 | arCOG00048 | L |                                                                                                           |           |      |                                              |                                                        |  |
| Nst1_335     | C2 | arCOG01989 | J |                                                                                                           | 35281680  | 57.8 | Crenarchaeota                                | Thermoproteus tenax Kra 1                              |  |
| Nst1_336     | C2 | arCOG01988 | J | EFB1                                                                                                      | 41615014  | 82   | Nanoarchaeota                                | Nanoarchaeum equitans Kin4-M                           |  |
| Nst1_337     | C2 | arCOG01526 | L |                                                                                                           | 212223477 | 564  | Euryarchaeota                                | Thermococcus onnurineus NA1                            |  |
| Nst1_338     | C2 | arCOG01641 | R |                                                                                                           | 159041804 | 61.2 | Crenarchaeota                                | Caldwriga maquilingsiensis IC-167                      |  |
| Nst1_339     | C2 | arCOG01751 | J | RPL8A                                                                                                     | 41615108  | 148  | Nanoarchaeota                                | Nanoarchaeum equitans Kin4-M                           |  |
| Nst1_340     | C2 |            |   | Uncharacterized protein                                                                                   |           |      |                                              |                                                        |  |
| Nst1_341     | C2 |            |   | Uncharacterized protein                                                                                   |           |      |                                              |                                                        |  |
| Nst1_342     | C2 | arCOG01417 | M | RfaG                                                                                                      | 238809828 | 61.6 | Tenericutes                                  | Mycoplasma fermentans PG18                             |  |
| Nst1_343     | C2 | arCOG01111 | G | PpsA                                                                                                      | 20093692  | 787  | Euryarchaeota                                | Methanopyrus kandleri AV 19                            |  |
| Nst1_344     | C2 | arCOG01808 | N | TadC                                                                                                      | 288559927 | 92.8 | Euryarchaeota                                | Methanobrevibacter ruminantium M1                      |  |
| Nst1_345     | C2 | arCOG04177 | J |                                                                                                           |           |      |                                              |                                                        |  |
| Nst1_346     | C2 | arCOG04174 | J | TYW3                                                                                                      | 41615172  | 364  | Nanoarchaeota                                | Nanoarchaeum equitans Kin4-M                           |  |
| trNA Gln_CTG | C2 |            |   | trNA Gln_CTG                                                                                              |           |      |                                              |                                                        |  |
| Nst1_348     | C2 |            |   | Uncharacterized protein                                                                                   |           |      |                                              |                                                        |  |
| Nst1_349     | C2 | arCOG00967 | J |                                                                                                           | 41614801  | 106  | Nanoarchaeota                                | Nanoarchaeum equitans Kin4-M                           |  |
| trNA Val_CAC | C2 |            |   | trNA Val_CAC                                                                                              |           |      |                                              |                                                        |  |
| Nst1_350     | C2 | arCOG00132 | G | ProP                                                                                                      | 159042170 | 551  | Crenarchaeota                                | Caldwriga maquilingsiensis IC-167                      |  |
| Nst1_351     | C2 |            |   | Uncharacterized protein                                                                                   |           |      |                                              |                                                        |  |
| Nst1_352     | C2 | arCOG00017 | R |                                                                                                           | 255513363 | 48.5 | Euryarchaeota                                | Candidatus Micrarchaeum acidiphilum ARMAN-2            |  |
| Nst1_353     | C2 | arCOG01340 | C |                                                                                                           | 126466132 | 410  | Crenarchaeota                                | Staphylothermus marinus F1                             |  |
| Nst1_354     | C2 |            |   | Uncharacterized secreted or membrane protein                                                              |           |      |                                              |                                                        |  |
| Nst1_357     | C2 |            |   | Uncharacterized protein                                                                                   |           |      |                                              |                                                        |  |
| Nst1_358     | C2 |            |   | Uncharacterized protein                                                                                   |           |      |                                              |                                                        |  |
| Nst1_359     | C2 |            |   | Uncharacterized membrane protein                                                                          |           |      |                                              |                                                        |  |
| Nst1_360     | C2 | arCOG00561 | O |                                                                                                           | 290558928 | 87.4 | Euryarchaeota                                | Candidatus Parvarchaemum acidophilus ARMAN-5           |  |
| trNA Arg_CCT | C2 |            |   | trNA Arg_CCT                                                                                              |           |      |                                              |                                                        |  |
| Nst1_361     | C2 |            |   | Uncharacterized secreted protein                                                                          | 70606257  | 370  | Crenarchaeota                                | Sulfolobus acidocaldarius DSM 639                      |  |
| Nst1_362     | C2 |            |   | Uncharacterized protein                                                                                   | 385773946 | 44.7 | Crenarchaeota                                | Sulfolobus islandicus HVE104                           |  |
| Nst1_363     | C2 |            |   | Uncharacterized protein                                                                                   | 256811290 | 49.7 | Euryarchaeota                                | Methanocaldococcus fervens AG86                        |  |
| Nst1_364     | C2 |            |   | Uncharacterized protein                                                                                   |           |      |                                              |                                                        |  |
| Nst1_365     | C2 |            |   | Uncharacterized protein                                                                                   |           |      |                                              |                                                        |  |

|              |    |            |                                                             |           |      |                       |                                             |  |
|--------------|----|------------|-------------------------------------------------------------|-----------|------|-----------------------|---------------------------------------------|--|
| Nst1_366     | C2 |            | Uncharacterized protein                                     |           |      |                       |                                             |  |
| Nst1_367     | C2 | arCOG00726 | PIN domain containing protein                               | 229582944 | 171  | Crenarchaeota         | Sulfolobus islandicus Y.N.15.51             |  |
| Nst1_368     | C2 | arCOG00217 | Predicted antitoxin associated with PIN domain              | 227829601 | 130  | Crenarchaeota         | Sulfolobus islandicus L.S.2.15              |  |
| Nst1_369     | C2 |            | Uncharacterized protein                                     |           |      |                       |                                             |  |
| Nst1_370     | C2 | arCOG01205 | Minimal nucleotidyltransferase                              | 119720364 | 94.4 | Crenarchaeota         | Thermoflavin pendens Hrk 5                  |  |
| Nst1_371     | C2 | arCOG00196 | ABC-type multidrug transport system, ATPase component       | 385772344 | 525  | Crenarchaeota         | Sulfolobus islandicus HVE104                |  |
| Nst1_372     | C2 | arCOG01467 | ABC-type multidrug transport system, permease component     | 15922082  | 468  | Crenarchaeota         | Sulfolobus tokodaii str. 7                  |  |
| Nst1_373     | C2 | arCOG01943 | Amidase related to nicotinamidase                           | 332797196 | 332  | Crenarchaeota         | Acidinus hospitalis W1                      |  |
| Nst1_374     | C2 | arCOG00052 | Glucose-6-phosphatase isomerase                             | 305663934 | 132  | Crenarchaeota         | Ignisphaera aggregans DSM 17230             |  |
| Nst1_375     | C2 | arCOG00535 | Sulfur transfer protein involved in thiamine biosynthesis   | 291279006 | 55.8 | Deferribacteres       | Deferribacter desulfuricans DSM1            |  |
| Nst1_376     | C2 |            | Uncharacterized secreted or membrane protein                |           |      |                       |                                             |  |
| trNA_Ser_GCT | C2 |            | trNA_Ser_GCT                                                |           |      |                       |                                             |  |
| Nst1_377     | C2 |            | Uncharacterized protein                                     |           |      |                       |                                             |  |
| Nst1_378     | C2 | arCOG01937 | Archaeal serine protease                                    | 41614906  | 108  | Nanoarchaeota         | Nanoarchaeum equitans Kin4-M                |  |
| Nst1_379     | C2 | arCOG00032 | SAM-dependent methyltransferase fused to PUA domain         | 332158532 | 235  | Euryarchaeota         | Pyrococcus sp. NA2                          |  |
| Nst1_380     | C2 | arCOG04186 | Ribosomal protein S3Ae                                      | 41615164  | 162  | Nanoarchaeota         | Nanoarchaeum equitans Kin4-M                |  |
| Nst1_381     | C2 | arCOG00809 | Leucyl-tRNA synthetase                                      | 119719481 | 797  | Crenarchaeota         | Thermoflavin pendens Hrk 5                  |  |
| Nst1_382     | C2 |            | Uncharacterized protein                                     |           |      |                       |                                             |  |
| trNA_Gly_GCC | C2 |            | trNA_Gly_GCC                                                |           |      |                       |                                             |  |
| Nst1_383     | C2 |            | Uncharacterized protein                                     |           |      |                       |                                             |  |
| Nst1_384     | C2 | arCOG00501 | Metal-dependent hydrolase of the beta-lactamase superfamily | 41614860  | 229  | Nanoarchaeota         | Nanoarchaeum equitans Kin4-M                |  |
| Nst1_385     | C2 | arCOG01389 | Glycosyltransferase                                         | 119719076 | 134  | Crenarchaeota         | Thermoflavin pendens Hrk 5                  |  |
| Nst1_386     | C2 | arCOG01578 | Cation transport ATPase                                     | 153953615 | 358  | Firmicutes            | Clostridium kluyveri DSM 555                |  |
| Nst1_387     | C2 | arCOG01087 | Triosephosphate isomerase                                   | 14521935  | 263  | Euryarchaeota         | Pyrococcus abyssi GE5                       |  |
| Nst1_388     | C2 | arCOG01167 | Predicted ATPase (AAA superfamily)                          | 268325204 | 439  | environmental samples |                                             |  |
| Nst1_389     | C2 | arCOG01197 | Minimal nucleotidyltransferase                              | 158984959 | 160  | Crenarchaeota         | Sulfolobus solfataricus P2                  |  |
| Nst1_390     | C2 | arCOG01191 | HEPN domain containing protein                              | 15898460  | 154  | Crenarchaeota         | Sulfolobus solfataricus P2                  |  |
| Nst1_391     | C2 | arCOG00808 | Valyl-tRNA synthetase                                       | 12585346  | 426  | Euryarchaeota         | Pyrococcus horikoshii OT3                   |  |
| Nst1_392     | C2 |            | Uncharacterized membrane protein                            |           |      |                       |                                             |  |
| Nst1_393     | C2 | arCOG04241 | DNA-directed RNA polymerase subunit D                       | 41615237  | 129  | Nanoarchaeota         | Nanoarchaeum equitans Kin4-M                |  |
| trNA_Val_TAC | C2 |            | trNA_Val_TAC                                                |           |      |                       |                                             |  |
| Nst1_394     | C2 |            | Uncharacterized protein                                     |           |      |                       |                                             |  |
| Nst1_395     | C3 | arCOG01702 | SEN2                                                        |           |      |                       |                                             |  |
| trNA_Thr_TGT | C3 |            | trNA_Thr_TGT                                                |           |      |                       |                                             |  |
| Nst1_396     | C3 | arCOG01829 | FlaB                                                        | 223478421 | 74.3 | Euryarchaeota         | Thermococcus sp. AM4                        |  |
| Nst1_397     | C3 | arCOG00122 | J TrmA                                                      |           |      |                       |                                             |  |
| Nst1_398     | C3 |            | Uncharacterized protein                                     | 41614849  | 311  | Nanoarchaeota         | Nanoarchaeum equitans Kin4-M                |  |
| Nst1_399     | C3 | arCOG01829 | FlaB                                                        | 14590448  | 67.8 | Euryarchaeota         | Pyrococcus horikoshii OT3                   |  |
| trNA_Glu_TTC | C3 |            | trNA_Glu_TTC                                                |           |      |                       |                                             |  |
| Nst1_400     | C3 | arCOG01715 | O sufB                                                      | 383790890 | 399  | Spirochaetes          | Spirochaeta africana DSM 8902               |  |
| Nst1_401     | C3 | arCOG01951 | Predicted P-loop ATPase fused to an acetyltransferase       | 375281916 | 569  | Euryarchaeota         | Thermodesulfobrio yellowstonii DSM 11347    |  |
| Nst1_402     | C3 | arCOG01526 | Reverse gyrase                                              | 41615220  | 454  | Nanoarchaeota         | Nanoarchaeum equitans Kin4-M                |  |
| Nst1_403     | C3 | arCOG00551 | L                                                           | 341581246 | 66.6 | Euryarchaeota         | Thermococcus sp. 4557                       |  |
| Nst1_404     | C3 | arCOG04109 | Ribosomal protein L4E                                       | 41614978  | 76.6 | Nanoarchaeota         | Nanoarchaeum equitans Kin4-M                |  |
| Nst1_405     | C3 | arCOG05037 | S                                                           | 41615193  | 48.5 | Nanoarchaeota         | Nanoarchaeum equitans Kin4-M                |  |
| Nst1_406     | C3 | arCOG00348 | R                                                           | 150400664 | 83.4 | Euryarchaeota         | Methanococcus aeolicus Nankai-3             |  |
| Nst1_407     | C3 | arCOG00906 | J                                                           | 242398566 | 73.9 | Euryarchaeota         | Thermococcus sibiricus MM 739               |  |
| Nst1_408     | C3 | arCOG04107 | J                                                           | 41615191  | 127  | Nanoarchaeota         | Nanoarchaeum equitans Kin4-M                |  |
| Nst1_409     | C3 |            | Uncharacterized protein                                     |           |      |                       |                                             |  |
| Nst1_410     | C3 |            | Uncharacterized protein                                     |           |      |                       |                                             |  |
| Nst1_411     | C3 |            | Uncharacterized secreted or membrane protein                |           |      |                       |                                             |  |
| Nst1_412     | C3 | arCOG01741 | J PelA                                                      | 254168066 | 124  | Euryarchaeota         | Aciduliprofundum boonei T469                |  |
| Nst1_413     | C3 |            | Uncharacterized membrane protein                            |           |      |                       |                                             |  |
| Nst1_414     | C3 |            | Uncharacterized protein                                     |           |      |                       |                                             |  |
| Nst1_415     | C3 | arCOG00371 | D Smc                                                       | 374635895 | 112  | Euryarchaeota         | Methanoterris formicicus Mc-S-70            |  |
| Nst1_416     | C3 |            | Uncharacterized protein                                     |           |      |                       |                                             |  |
| Nst1_417     | C3 | arCOG00328 | L PolB                                                      | 206890537 | 457  | Nitrospirae           | Thermodesulfobrio yellowstonii DSM 11347    |  |
| Nst1_418     | C3 | arCOG04246 | J RtcB                                                      | 41614875  | 632  | Nanoarchaeota         | Nanoarchaeum equitans Kin4-M                |  |
| Nst1_419     | C3 |            | Uncharacterized membrane protein                            |           |      |                       |                                             |  |
| Nst1_420     | C3 | arCOG01572 | S                                                           | 325968638 | 70.1 | Crenarchaeota         | Vulcanisaeta moutnovskia 768-28             |  |
| trNA_Gln_TTG | C3 |            | trNA_Gln_TTG                                                |           |      |                       |                                             |  |
| Nst1_421     | C3 | arCOG00472 | L                                                           | 225848795 | 97.8 | Aquificae             | Sulfurhydrogenobium azoense Az-Fu1          |  |
| Nst1_422     | C3 | arCOG00042 | D MesJ                                                      | 41615304  | 273  | Nanoarchaeota         | Nanoarchaeum equitans Kin4-M                |  |
| Nst1_423     | C3 |            | Uncharacterized protein                                     |           |      |                       |                                             |  |
| Nst1_424     | C3 |            | Uncharacterized conserved membrane protein                  |           |      |                       |                                             |  |
| Nst1_425     | C3 | arCOG04244 | K RPB10                                                     | 20094914  | 81.6 | Euryarchaeota         | Methanopyrus kandleri AV19                  |  |
| Nst1_426     | C3 | arCOG00357 | J                                                           | 41615249  | 551  | Nanoarchaeota         | Nanoarchaeum equitans Kin4-M                |  |
| trNA_Met_CAT | C3 |            | trNA_Met_CAT                                                |           |      |                       |                                             |  |
| Nst1_427     | C3 | arCOG01753 | K Shh10b                                                    | 41615153  | 106  | Nanoarchaeota         | Nanoarchaeum equitans Kin4-M                |  |
| Nst1_428     | C3 | arCOG01885 | J RPS17A                                                    | 289193270 | 68.6 | Euryarchaeota         | Methanocaldococcus sp. FS406-22             |  |
| Nst1_429     | C3 | arCOG01711 | C Ppa                                                       | 171185208 | 298  | Crenarchaeota         | Pyrobaicum neutrophilum V245a               |  |
| Nst1_430     | C3 | arCOG00973 | J Sun                                                       | 41615318  | 387  | Nanoarchaeota         | Nanoarchaeum equitans Kin4-M                |  |
| trNA_Arg_TCG | C3 |            | trNA_Arg_TCG                                                |           |      |                       |                                             |  |
| Nst1_431     | C3 | arCOG05072 | C                                                           | 150400876 | 118  | Euryarchaeota         | Methanococcus aeolicus Nankai-3             |  |
| trNA_Leu_CAG | C3 |            | trNA_Leu_CAG                                                |           |      |                       |                                             |  |
| Nst1_432     | C3 | arCOG01039 | F AdkA                                                      | 296109296 | 136  | Euryarchaeota         | Methanocaldococcus infernus ME              |  |
| trNA_Leu_GAG | C3 |            | trNA_Leu_GAG                                                |           |      |                       |                                             |  |
| Nst1_433     | C3 |            | Uncharacterized membrane protein                            |           |      |                       |                                             |  |
| Nst1_434     | C3 | arCOG00486 | J Cys5                                                      | 41614851  | 519  | Nanoarchaeota         | Nanoarchaeum equitans Kin4-M                |  |
| Nst1_435     | C3 | arCOG01563 | J GCD11                                                     | 41615062  | 419  | Nanoarchaeota         | Nanoarchaeum equitans Kin4-M                |  |
| Nst1_436     | C3 | arCOG04312 | R                                                           | 359415611 | 50.1 | Euryarchaeota         | Candidatus Haloredivirus sp. G17            |  |
| Nst1_437     | C3 | arCOG00358 | R DRG                                                       | 41614908  | 137  | Nanoarchaeota         | Nanoarchaeum equitans Kin4-M                |  |
| Nst1_438     | C3 |            | Uncharacterized protein                                     |           |      |                       |                                             |  |
| Nst1_439     | C3 | arCOG00985 | J                                                           | 41615000  | 100  | Nanoarchaeota         | Nanoarchaeum equitans Kin4-M                |  |
| Nst1_440     | C3 | arCOG04269 | S                                                           | 327400273 | 209  | Euryarchaeota         | Archaeoglobus veneficus SNP6                |  |
| Nst1_441     | C3 | arCOG04112 | J DPH2                                                      | 312137233 | 101  | Euryarchaeota         | Methanothermobacter ferredoxin DSM 2088     |  |
| Nst1_442     | C3 | arCOG01814 | N                                                           | 269986816 | 238  | Euryarchaeota         | Candidatus Parvarchaean acidophilum ARMAN-4 |  |
| Nst1_443     | C3 | arCOG01818 | N VirB11                                                    | 41615211  | 568  | Nanoarchaeota         | Nanoarchaeum equitans Kin4-M                |  |
| Nst1_444     | C3 |            | Uncharacterized protein                                     | 339751139 | 60.5 | Euryarchaeota         | Candidatus Nanosaitanarum sp. J07AB56       |  |
| Nst1_445     | C3 |            | Uncharacterized protein                                     | 41615268  | 87.4 | Nanoarchaeota         | Nanoarchaeum equitans Kin4-M                |  |
| Nst1_446     | C3 |            | Uncharacterized protein                                     | 336121171 | 45.1 | Euryarchaeota         | Methanothermobacter okinawensis IH1         |  |
| Nst1_447     | C3 | arCOG00891 | L TatD                                                      | 159041873 | 224  | Crenarchaeota         | Caldivirga maquilingsis IC-167              |  |
| Nst1_448     | C3 | arCOG04270 | K TFA1                                                      | 332796493 | 84.7 | Crenarchaeota         | Acidinus hospitalis W1                      |  |
| Nst1_449     | C3 | arCOG01719 | J GafE                                                      | 332797055 | 189  | Crenarchaeota         | Acidinus hospitalis W1                      |  |
| Nst1_450     | C3 | arCOG00419 | HIT                                                         | 41615301  | 139  | Nanoarchaeota         | Nanoarchaeum equitans Kin4-M                |  |
| Nst1_451     | C3 | arCOG00417 | L RecA                                                      | 312137146 | 198  | Euryarchaeota         | Methanothermobacter ferredoxin DSM 2088     |  |
| Nst1_452     | C3 | arCOG04249 | J CCA1                                                      | 41614948  | 228  | Nanoarchaeota         | Nanoarchaeum equitans Kin4-M                |  |
| Nst1_453     | C3 | arCOG01742 | J eRF1                                                      | 41614848  | 350  | Nanoarchaeota         | Nanoarchaeum equitans Kin4-M                |  |
| Nst1_454     | C3 | arCOG01180 | T RO1                                                       | 312136522 | 160  | Euryarchaeota         | Methanothermobacter ferredoxin DSM 2088     |  |
| Nst1_455     | C3 |            | Uncharacterized protein                                     |           |      |                       |                                             |  |
| Nst1_456     | C3 |            | Uncharacterized protein                                     |           |      |                       |                                             |  |
| Nst1_457     | C3 | arCOG04245 | J Rps8                                                      | 41615290  | 224  | Nanoarchaeota         | Nanoarchaeum equitans Kin4-M                |  |
| Nst1_458     | C3 | arCOG04067 | J RplB                                                      | 41615150  | 200  | Nanoarchaeota         | Nanoarchaeum equitans Kin4-M                |  |
| Nst1_459     | C3 | arCOG04072 | J RplW                                                      | 156937757 | 94.4 | Crenarchaeota         | Ignicoccus hospitalis KIN4/I                |  |
| Nst1_460     | C3 | arCOG04071 | J RplD                                                      | 41614941  | 210  | Nanoarchaeota         | Nanoarchaeum equitans Kin4-M                |  |
| Nst1_461     | C3 | arCOG01809 | N Flaj                                                      | 296109771 | 219  | Euryarchaeota         | Methanocaldococcus infernus ME              |  |
| Nst1_462     | C3 | arCOG02285 | J                                                           | 41615099  | 63.5 | Nanoarchaeota         | Nanoarchaeum equitans Kin4-M                |  |
| Nst1_463     | C3 | arCOG00470 | L HolB                                                      | 41615216  | 367  | Nanoarchaeota         | Nanoarchaeum equitans Kin4-M                |  |
| Nst1_464     | C3 |            | Uncharacterized protein                                     |           |      |                       |                                             |  |
| Nst1_465     | C3 |            | Uncharacterized protein                                     |           |      |                       |                                             |  |
| Nst1_466     | C3 |            | Uncharacterized protein                                     |           |      |                       |                                             |  |
| Nst1_467     | C3 | arCOG05419 | S                                                           | 170290400 | 41.6 | Korarchaeota          | Candidatus Korarchaeum cryptophilum OPF8    |  |
| Nst1_468     | C3 |            | Uncharacterized protein                                     |           |      |                       |                                             |  |
| Nst1_469     | C3 | arCOG00469 | L HolB                                                      | 41614964  | 411  | Nanoarchaeota         | Nanoarchaeum equitans Kin4-M                |  |
| Nst1_470     | C3 | arCOG00109 | J HemK                                                      | 41615032  | 111  | Nanoarchaeota         | Nanoarchaeum equitans Kin4-M                |  |
| Nst1_471     | C3 | arCOG00891 | L TatD                                                      | 41615242  | 189  | Nanoarchaeota         | Aciduliprofundum boonei T469                |  |
| Nst1_472     | C3 | arCOG02207 | L XshA                                                      | 332797757 | 328  | Crenarchaeota         | Acidinus hospitalis W1                      |  |
| Nst1_473     | C3 | arCOG01252 | C PUAa                                                      | 159041549 | 619  | Crenarchaeota         | Caldivirga maquilingsis IC-167              |  |
| Nst1_474     | C3 | arCOG04253 | S                                                           | 34125508  | 107  | Thaumarchaeota        | Candidatus Caldichaeum subterraneum         |  |
| trNA_Val_TAC | C3 |            | trNA_Val_TAC                                                |           |      |                       |                                             |  |
| Nst1_475     | C3 | arCOG04241 | K RpoA/Rpo1                                                 | 223477958 | 110  | Euryarchaeota         | Thermococcus sp. AM4                        |  |
| Nst1_476     | C3 | arCOG01845 | R PaaD                                                      | 41615140  | 96.3 | Nanoarchaeota         | Nanoarchaeum equitans Kin4-M                |  |
| Nst1_477     | C3 | arCOG01296 | O TrxB                                                      | 41615274  | 324  | Nanoarchaeota         | Nanoarchaeum equitans Kin4-M                |  |
| Nst1_478     | C3 |            | Uncharacterized protein                                     |           |      |                       |                                             |  |
| Nst1_479     | C3 | arCOG01218 | O TrxA                                                      | 212223465 | 146  | Euryarchaeota         | Thermococcus onnurineus NA1                 |  |
| Nst1_480     | C3 | arCOG04253 | S                                                           | 254166902 | 124  | Euryarchaeota         | Aciduliprofundum boonei T469                |  |
| Nst1_481     | C4 | arCOG01397 | M WcaA                                                      | 332795758 | 98.2 | Crenarchaeota         | Acidinus hospitalis W1                      |  |
| Nst1_482     | C4 | arCOG01367 | M RfbD                                                      | 284997404 | 453  | Crenarchaeota         | Sulfolobus islandicus L.D.8.5               |  |
| Nst1_483     | C4 | arCOG04188 | M RfbC                                                      | 284997405 | 300  | Crenarchaeota         | Sulfolobus islandicus L.D.8.5               |  |
| Nst1_484     | C4 | arCOG00663 | M GCD1                                                      | 307595587 | 306  | Crenarchaeota         | Vulcanisaeta distributa DSM 14429           |  |
| Nst1_485     | C4 |            | Uncharacterized membrane protein                            | 332795585 | 69.3 | Crenarchaeota         | Acidinus hospitalis W1                      |  |
| Nst1_486     | C4 |            | Uncharacterized protein                                     |           |      |                       |                                             |  |
| Nst1_487     | C4 |            | Uncharacterized protein                                     |           |      |                       |                                             |  |
| Nst1_488     | C4 |            | Uncharacterized protein                                     |           |      |                       |                                             |  |

|          |    |            |   |                                                                                                            |                                                                                                                                                    |           |                |                                                  |                                             |
|----------|----|------------|---|------------------------------------------------------------------------------------------------------------|----------------------------------------------------------------------------------------------------------------------------------------------------|-----------|----------------|--------------------------------------------------|---------------------------------------------|
| Nst1_489 | C4 | arCOG03167 | R | Predicted ATPase (AAA+ superfamily)                                                                        | 14521104                                                                                                                                           | 395       | Euryarchaeota  | Pyrococcus abyssi GE5                            |                                             |
| Nst1_490 | C4 |            |   | Uncharacterized protein                                                                                    |                                                                                                                                                    |           |                |                                                  |                                             |
| Nst1_491 | C4 | arCOG01573 | M | MscS                                                                                                       | 389861581                                                                                                                                          | 240       | Crenarchaeota  | Thermoglobus cellulosilyticus 1633               |                                             |
| Nst1_492 | C4 | arCOG07455 | S | Uncharacterized conserved protein                                                                          | 22982570                                                                                                                                           | 228       | Crenarchaeota  | Sulfolobus islandicus Y.N.15.51                  |                                             |
| Nst1_493 | C4 |            |   | Secreted protein (TAT signal)                                                                              |                                                                                                                                                    |           |                |                                                  |                                             |
| Nst1_494 | C4 | arCOG00921 | K | Predicted transcriptional regulator                                                                        | 218883350                                                                                                                                          | 190       | Crenarchaeota  | Desulfurococcus kamchathensis 1221n              |                                             |
| Nst1_495 | C4 | arCOG03869 | S | Uncharacterized membrane protein                                                                           | 332796630                                                                                                                                          | 70.5      | Crenarchaeota  | Acidinus hospitalis W1                           |                                             |
| Nst1_496 | C4 | arCOG05276 | L | Pyrimidine dimer DNA glycosylase, T4 endov' family                                                         | 332797517                                                                                                                                          | 233       | Crenarchaeota  | Acidinus hospitalis W1                           |                                             |
| Nst1_497 | C4 | arCOG01606 | C | Pyruvate:ferredoxin oxidoreductase or related 2-oxoacid:ferredoxin oxidoreductase, alpha subunit and gamma | 319790349                                                                                                                                          | 202       | Aquificae      | Thermovibrio ammonificans HB-1                   |                                             |
| Nst1_498 | C4 | arCOG01358 | J | MlaB                                                                                                       | 41614804                                                                                                                                           | 361       | Nanoarchaeota  | Nanoarchaeum equitans Kin4-M                     |                                             |
| Nst1_499 | C4 |            |   | Uncharacterized protein                                                                                    |                                                                                                                                                    |           |                |                                                  |                                             |
| Nst1_500 | C4 | arCOG03698 | S | Uncharacterized conserved protein                                                                          | 15899033                                                                                                                                           | 91.7      | Crenarchaeota  | Sulfolobus solfataricus P2                       |                                             |
| Nst1_501 | C4 | arCOG01993 | G | GpmA                                                                                                       | 269986713                                                                                                                                          | 263       | Euryarchaeota  | Candidatus Parvarchaeum acidiphilum ARMAN-4      |                                             |
| Nst1_502 | C4 | arCOG00403 | J | SerS                                                                                                       | 347524046                                                                                                                                          | 365       | Crenarchaeota  | Pyrolobus fumari 1A                              |                                             |
| Nst1_503 | C4 | arCOG04305 | J | RPS26B                                                                                                     | 41614839                                                                                                                                           | 39.7      | Nanoarchaeota  | Nanoarchaeum equitans Kin4-M                     |                                             |
| Nst1_504 | C4 | arCOG00412 | J | PheT                                                                                                       | 14950443                                                                                                                                           | 422       | Euryarchaeota  | Pyrococcus horikoshii OT3                        |                                             |
| Nst1_505 | C4 | arCOG00410 | J | PheS                                                                                                       | 315230169                                                                                                                                          | 311       | Euryarchaeota  | Thermococcus barophilus MP                       |                                             |
| Nst1_506 | C4 | arCOG01204 | R | Minimalductocytin transferase fused to HEPN domain                                                         | 41615152                                                                                                                                           | 131       | Nanoarchaeota  | Nanoarchaeum equitans Kin4-M                     |                                             |
| Nst1_507 | C4 | arCOG01185 | T | Mn2+-dependent serine/threonine protein kinase                                                             | 242399519                                                                                                                                          | 158       | Euryarchaeota  | Thermococcus sibiricus MM 739                    |                                             |
| Nst1_508 | C4 |            |   | Zn finger protein                                                                                          | 333987088                                                                                                                                          | 41.6      | Euryarchaeota  | Methanobacterium sp. SWAN-1                      |                                             |
| Nst1_509 | C4 | arCOG00307 | J | RPP1                                                                                                       | 400404363                                                                                                                                          | 55.8      | Proteobacteria | Candidatus Carsonella ruddii HC isolate Thao2000 |                                             |
| Nst1_510 | C4 |            |   | Uncharacterized protein                                                                                    | 290558928                                                                                                                                          | 137       | Euryarchaeota  | Candidatus Parvarchaeum acidiphilum ARMAN-5      |                                             |
| Nst1_511 | C4 |            |   | Uncharacterized protein                                                                                    |                                                                                                                                                    |           |                |                                                  |                                             |
| Nst1_512 | C4 | arCOG03054 | U | SecF                                                                                                       | 269986958                                                                                                                                          | 122       | Euryarchaeota  | Candidatus Parvarchaeum acidiphilum ARMAN-4      |                                             |
| Nst1_513 | C4 | arCOG04055 | R | SH2 domain protein implicated in nucleic acid metabolism                                                   | 18977924                                                                                                                                           | 109       | Euryarchaeota  | Pyrococcus furiosus DSM 3638                     |                                             |
| Nst1_514 | C4 | arCOG04702 | R | Phospholipid-binding protein                                                                               | 297526620                                                                                                                                          | 143       | Crenarchaeota  | Staphylothermus hellenicus DSM 12710             |                                             |
| Nst1_515 | C4 | arCOG04185 | J | RpsO                                                                                                       | 327310281                                                                                                                                          | 103       | Crenarchaeota  | Thermoproteus uzoniensis 768-20                  |                                             |
| Nst1_516 | C4 | arCOG00427 | L | RecJ/Cdc45                                                                                                 | 148643253                                                                                                                                          | 118       | Euryarchaeota  | Methanobrevibacter smithii ATCC 35061            |                                             |
| Nst1_517 | C4 | arCOG00398 | S | ASCH domain predicted RNA-binding domain                                                                   | 375082335                                                                                                                                          | 172       | Euryarchaeota  | Thermococcus litoreus DSM 5473                   |                                             |
| Nst1_518 | C4 | arCOG06946 | S | Uncharacterized conserved membrane protein                                                                 | 255513672                                                                                                                                          | 133       | Euryarchaeota  | Candidatus Micrarchaeum acidiphilum ARMAN-2      |                                             |
| Nst1_519 | C4 |            |   | Uncharacterized conserved membrane protein                                                                 | 41615124                                                                                                                                           | 52        | Nanoarchaeota  | Nanoarchaeum equitans Kin4-M                     |                                             |
| Nst1_520 | C4 | arCOG00424 | L | DH1 superfamily phosphohydrolase/exonuclease                                                               | 41614913                                                                                                                                           | 206       | Nanoarchaeota  | Nanoarchaeum equitans Kin4-M                     |                                             |
| Nst1_521 | C4 |            |   | Uncharacterized protein                                                                                    |                                                                                                                                                    |           |                |                                                  |                                             |
| Nst1_522 | C5 | arCOG01159 | S | Uncharacterized archaeal coiled-coil protein                                                               | 82595012                                                                                                                                           | 57.4      |                |                                                  |                                             |
| Nst1_523 | C5 | arCOG01411 | M | RfaG                                                                                                       | 284997423                                                                                                                                          | 569       | Crenarchaeota  | Sulfolobus islandicus LD.8.5                     |                                             |
| Nst1_524 | C5 | arCOG07390 | M | RfaG                                                                                                       | 227827286                                                                                                                                          | 236       | Crenarchaeota  | Sulfolobus islandicus M.14.25                    |                                             |
| Nst1_525 | C5 | arCOG01411 | M | RfaG                                                                                                       | 41614989                                                                                                                                           | 472       | Nanoarchaeota  | Nanoarchaeum equitans Kin4-M                     |                                             |
| Nst1_526 | C5 | arCOG01400 | Q | SAM-dependent methyltransferase                                                                            | 159042031                                                                                                                                          | 222       | Crenarchaeota  | Caldivaga maquilguensis IC-162                   |                                             |
| Nst1_527 | C5 | arCOG00767 | G | (ManB)                                                                                                     | Phosphotransferase                                                                                                                                 | 18312164  | 261            | Crenarchaeota                                    | Pyrobaculum aerophilum str. IM2             |
| Nst1_528 | C5 | arCOG04120 | G | PykF                                                                                                       | 332797933                                                                                                                                          | 556       | Crenarchaeota  | Acidinus hospitalis W1                           |                                             |
| Nst1_529 | C5 | arCOG04069 | R | RNA methyltransferase, SPOUT superfamily                                                                   | 18978198                                                                                                                                           | 134       | Euryarchaeota  | Pyrococcus furiosus DSM 3638                     |                                             |
| Nst1_530 | C5 | arCOG01338 | C | Acyl-CoA synthetase, ATP-grasp containing subunit                                                          | 399514774                                                                                                                                          | 107       | Proteobacteria | gamma proteobacterium SCOC AAA007-O20            |                                             |
| Nst1_531 | C5 |            |   | Uncharacterized protein                                                                                    |                                                                                                                                                    |           |                |                                                  |                                             |
| Nst1_532 | C5 | arCOG01400 | Q | SAM-dependent methyltransferase                                                                            | 159042031                                                                                                                                          | 218       | Crenarchaeota  | Caldivaga maquilguensis IC-167                   |                                             |
| Nst1_533 | C5 | arCOG05398 | M | Glycosyltransferase                                                                                        | 48477373                                                                                                                                           | 107       | Euryarchaeota  | Picrophilus torridus DSM 9790                    |                                             |
| Nst1_534 | C5 | arCOG06139 | V | HEPN domain containing protein                                                                             |                                                                                                                                                    |           |                |                                                  |                                             |
| Nst1_535 | C5 | arCOG01107 | E | ArgE                                                                                                       | 332795886                                                                                                                                          | 465       | Crenarchaeota  | Acidinus hospitalis W1                           |                                             |
| Nst1_536 | C5 | arCOG04048 | F | Dcd                                                                                                        | 41615118                                                                                                                                           | 204       | Nanoarchaeota  | Nanoarchaeum equitans Kin4-M                     |                                             |
| Nst1_537 | C5 |            |   | Membrane protein                                                                                           |                                                                                                                                                    |           |                |                                                  |                                             |
| Nst1_538 | C5 | arCOG01915 | O | HflC                                                                                                       | 284161351                                                                                                                                          | 182       | Euryarchaeota  | Archaeoglobus profundus DSM 5631                 |                                             |
| Nst1_539 | C5 |            |   | Uncharacterized protein                                                                                    |                                                                                                                                                    |           |                |                                                  |                                             |
| Nst1_540 | C5 | arCOG04179 | R | DNA-binding protein                                                                                        | 41614945                                                                                                                                           | 64.3      | Nanoarchaeota  | Nanoarchaeum equitans Kin4-M                     |                                             |
| Nst1_541 | C5 | arCOG04143 | L | DNA topoisomerase VI, subunit A                                                                            | 41615325                                                                                                                                           | 487       | Nanoarchaeota  | Nanoarchaeum equitans Kin4-M                     |                                             |
| Nst1_542 | C5 | arCOG01165 | L | DNA topoisomerase VI, subunit B                                                                            | 41614939                                                                                                                                           | 447       | Nanoarchaeota  | Nanoarchaeum equitans Kin4-M                     |                                             |
| Nst1_543 | C5 | arCOG04150 | R | Predicted RNA-binding protein (contains KH domains)                                                        | 305663515                                                                                                                                          | 94        | Crenarchaeota  | Ignisphaera aggens DSM 17230                     |                                             |
| Nst1_544 | C5 | arCOG01599 | C | PorB                                                                                                       | Pyruvate:ferredoxin oxidoreductase or related 2-oxoacid:ferredoxin oxidoreductase, beta subunit                                                    | 119720360 | 273            | Crenarchaeota                                    | Thermophilum pendens Hk 5                   |
| Nst1_545 | C5 |            |   | Uncharacterized membrane protein                                                                           | 290559522                                                                                                                                          | 75.5      | Euryarchaeota  | Candidatus Parvarchaeum acidiphilum ARMAN-5      |                                             |
| Nst1_546 | C5 | arCOG04761 | I | UppP                                                                                                       | 15922126                                                                                                                                           | 318       | Crenarchaeota  | Sulfolobus tokodaii str. 7                       |                                             |
| Nst1_547 | C5 |            |   | Uncharacterized membrane protein                                                                           |                                                                                                                                                    |           |                |                                                  |                                             |
| Nst1_548 | C5 | arCOG00579 | K | RPB9                                                                                                       | DNA-directed RNA polymerase, subunit M/Transcription elongation factor                                                                             | 57640468  | 113            | Euryarchaeota                                    | Thermococcus kodakarensis KOD1              |
| Nst1_549 | C5 | arCOG01739 | U | LepB                                                                                                       | Signal peptidase I                                                                                                                                 | 290559188 | 74.7           | Euryarchaeota                                    | Candidatus Parvarchaeum acidiphilum ARMAN-5 |
| Nst1_550 | C5 | arCOG05412 | G | BglB                                                                                                       | Beta-galactosidase/6-phospho-beta-galactosidase/beta-galactosidase                                                                                 | 254168937 | 210            | Euryarchaeota                                    | Aciduliprofundum boonei T469                |
| Nst1_551 | C5 | arCOG00324 | R | AcuC                                                                                                       | Deacetylase, including yeast histone deacetylase and acetoacetylase                                                                                | 41615319  | 200            | Nanoarchaeota                                    | Nanoarchaeum equitans Kin4-M                |
| Nst1_552 | C5 | arCOG00038 | J | Thil                                                                                                       | RNA S(4)U 4-thiouridine synthase                                                                                                                   | 41615210  | 252            | Nanoarchaeota                                    | Nanoarchaeum equitans Kin4-M                |
| Nst1_553 | C5 |            |   | Uncharacterized protein                                                                                    |                                                                                                                                                    |           |                |                                                  |                                             |
| Nst1_554 | C5 | arCOG01263 | R | DlE                                                                                                        | Short-chain dihydrogenase                                                                                                                          | 390960765 | 65.9           | Euryarchaeota                                    | Thermococcus sp. CL1                        |
| Nst1_555 | C5 | arCOG00969 | R | DlE                                                                                                        | Predicted hydrolase (metallo-beta-lactamase superfamily)                                                                                           | 126465143 | 191            | Crenarchaeota                                    | Staphylothermus marinus F1                  |
| Nst1_556 | C5 |            |   | Uncharacterized protein                                                                                    |                                                                                                                                                    |           |                |                                                  |                                             |
| Nst1_557 | C5 | arCOG04144 | L | L                                                                                                          | 8-oxoguanine DNA glycosylase                                                                                                                       | 41615297  | 169            | Nanoarchaeota                                    | Nanoarchaeum equitans Kin4-M                |
| Nst1_558 | C5 | arCOG01224 | S | S                                                                                                          | Uncharacterized conserved protein                                                                                                                  | 269986760 | 53.1           | Euryarchaeota                                    | Candidatus Parvarchaeum acidiphilum ARMAN-4 |
| Nst1_559 | C5 | arCOG01169 | G | Eno                                                                                                        | Enolase                                                                                                                                            | 284161315 | 274            | Euryarchaeota                                    | Archaeoglobus profundus DSM 5631            |
| Nst1_560 | C5 | arCOG03871 | N | Flagellar protein G                                                                                        | 15921688                                                                                                                                           | 55.5      | Crenarchaeota  | Sulfolobus tokodaii str. 7                       |                                             |
| Nst1_561 | C5 | arCOG00784 | J | POP4                                                                                                       | RNase P/RNase MRP subunit p29                                                                                                                      | 261402348 | 70.5           | Euryarchaeota                                    | Methanocaldococcus vulcanius M7             |
| Nst1_562 | C5 | arCOG04223 | J | SUI1                                                                                                       | Translation initiation factor 1 (eIF-1/SUI1)                                                                                                       | 18978189  | 94.7           | Euryarchaeota                                    | Pyrococcus furiosus DSM 3638                |
| Nst1_563 | C5 | arCOG00785 | J | J                                                                                                          | Ribosomal protein L29                                                                                                                              |           |                |                                                  |                                             |
| Nst1_564 | C5 | arCOG01183 | L | Kae1/QR7                                                                                                   | Subunit of KEOPS complex, contains a domain with ASKHA fold and RIO-type                                                                           | 41615276  | 248            | Nanoarchaeota                                    | Nanoarchaeum equitans Kin4-M                |
| Nst1_565 | C5 | arCOG01946 | J | RPS6A                                                                                                      | Ribosomal protein S6E (S10)                                                                                                                        | 41614902  | 143            | Nanoarchaeota                                    | Nanoarchaeum equitans Kin4-M                |
| Nst1_566 | C5 |            |   | Uncharacterized protein                                                                                    |                                                                                                                                                    |           |                |                                                  |                                             |
| Nst1_567 | C5 | arCOG01560 | J | InfB                                                                                                       | Translation initiation factor 2 (IF-2, GTPase)                                                                                                     | 242398523 | 580            | Euryarchaeota                                    | Thermococcus sibiricus MM 739               |
| Nst1_568 | C5 | arCOG00663 | M | GCD1                                                                                                       | Nucleoside-diphosphate-sugar pyrophosphorylase involved in lipopolysaccharide biosynthesis/translation initiation factor 2B, gamma/epsilon subunit | 41614821  | 259            | Nanoarchaeota                                    | Nanoarchaeum equitans Kin4-M                |
| Nst1_569 | C5 | arCOG06957 | S | S                                                                                                          | Uncharacterized secreted protein                                                                                                                   | 333986509 | 127            | Euryarchaeota                                    | Methanobacterium sp. SWAN-1                 |
| Nst1_570 | C5 |            |   | Uncharacterized protein                                                                                    |                                                                                                                                                    |           |                |                                                  |                                             |
| Nst1_571 | C5 | arCOG01808 | N | TadC                                                                                                       | Flp pilus assembly protein TadC                                                                                                                    | 41615060  | 151            | Nanoarchaeota                                    | Nanoarchaeum equitans Kin4-M                |
| Nst1_572 | C5 | arCOG01808 | N | TadC                                                                                                       | Flp pilus assembly protein TadC                                                                                                                    | 41615061  | 171            | Nanoarchaeota                                    | Nanoarchaeum equitans Kin4-M                |
| Nst1_573 | C5 |            |   | Uncharacterized protein                                                                                    | 296109472                                                                                                                                          | 45.4      | Euryarchaeota  | Methanocaldococcus infernus ME                   |                                             |
| Nst1_574 | C5 | arCOG04313 | F | Ndk                                                                                                        | Nucleoside diphosphate kinase                                                                                                                      | 352681785 | 219            | Crenarchaeota                                    | Thermoproteus tenax Kra 1                   |
| Nst1_575 | C5 | arCOG01950 | J | RPL24A                                                                                                     | Ribosomal protein L24E                                                                                                                             | 296243107 | 87             | Crenarchaeota                                    | Thermoplasma aggregans DSM 11486            |
| Nst1_576 | C5 | arCOG04114 | J | RPS28A                                                                                                     | Ribosomal protein S28/S53                                                                                                                          | 41615149  | 98.6           | Nanoarchaeota                                    | Nanoarchaeum equitans Kin4-M                |
| Nst1_577 | C5 | arCOG02044 | R | R                                                                                                          | Uncharacterized membrane protein, required for N-linked glycosylation                                                                              | 41614951  | 172            | Nanoarchaeota                                    | Nanoarchaeum equitans Kin4-M                |
| Nst1_578 | C5 | arCOG03199 | M | Rfe                                                                                                        | UDP-N-acetylmuramyl pentapeptide phosphotransferase/UDP-N-acetylglucosamine-1-phosphate transferase                                                | 297526643 | 341            | Crenarchaeota                                    | Staphylothermus hellenicus DSM 12710        |
| Nst1_579 | C5 | arCOG02209 | R | RfbX                                                                                                       | Polysaccharide biosynthesis protein, Mvin family                                                                                                   | 41614887  | 99             | Nanoarchaeota                                    | Nanoarchaeum equitans Kin4-M                |
| Nst1_580 | C5 | arCOG00014 | G | RbsK                                                                                                       | Sugar kinase, ribokinase family                                                                                                                    |           |                | Firmicutes                                       | Lactobacillus gasseri ATCC 33523            |
| Nst1_581 | C5 | arCOG01182 | T | T                                                                                                          | Uncharacterized protein                                                                                                                            |           |                |                                                  |                                             |
| Nst1_582 | C5 | arCOG00401 | J | ThrS                                                                                                       | Predicted Ser/Thr protein kinase                                                                                                                   | 327400500 | 79.3           | Euryarchaeota                                    | Archaeoglobus veneficus SNP6                |
| Nst1_583 | C6 | arCOG02079 | M | M                                                                                                          | S-layer domain                                                                                                                                     | 156937646 | 432            | Crenarchaeota                                    | Ignicoccus hospitalis KIN4/I                |
| Nst1_584 | C6 | arCOG02160 | O | LonB                                                                                                       | Predicted ATP-dependent protease                                                                                                                   | 253682208 | 88.6           | Firmicutes                                       | Clostridium botulinum D str. 1873           |
| Nst1_585 | C6 |            |   | Uncharacterized membrane protein                                                                           | 332158725                                                                                                                                          | 690       | Euryarchaeota  | Pyrococcus sp. NA2                               |                                             |
| Nst1_586 | C6 | arCOG01981 | K | SUA7                                                                                                       | Transcription initiation factor TFIIB, Brf1 subunit/Transcription initiation factor TFIIB                                                          | 289192865 | 263            | Euryarchaeota                                    | Methanocaldococcus sp. FS406-22             |
| Nst1_587 | C6 | arCOG01365 | J | POPS                                                                                                       | RNase P/RNase MRP subunit POPS                                                                                                                     |           |                |                                                  |                                             |
| Nst1_588 | C6 | arCOG00971 | O | PRE1                                                                                                       | 20S proteasome, alpha subunit                                                                                                                      | 13541135  | 195            | Euryarchaeota                                    | Thermoplasma volcanium GSS1                 |
| Nst1_589 | C6 | arCOG04187 | J | J                                                                                                          | Predicted exosome subunit                                                                                                                          | 288930695 | 162            | Euryarchaeota                                    | Ferroglobus placidus DSM 10642              |
| Nst1_590 | C6 |            |   | Uncharacterized membrane protein                                                                           |                                                                                                                                                    |           |                |                                                  |                                             |
| Nst1_591 | C6 | arCOG04922 | M | RfaG                                                                                                       | Glycosyltransferase                                                                                                                                | 290559635 | 304            | Euryarchaeota                                    | Candidatus Parvarchaeum acidiphilum ARMAN-5 |
| Nst1_592 | C6 | arCOG00589 | R | R                                                                                                          | CobQ/CobB/MinD/ParA ATPase                                                                                                                         | 41614915  | 65.5           | Nanoarchaeota                                    | Nanoarchaeum equitans Kin4-M                |
| Nst1_593 | C6 |            |   | Uncharacterized protein                                                                                    |                                                                                                                                                    |           |                |                                                  |                                             |
| Nst1_594 | C6 | arCOG03278 | G | G                                                                                                          | Glycosyl hydrolase family 57                                                                                                                       | 333911502 | 376            | Euryarchaeota                                    | Methanotrix igneus Kol 5                    |
| Nst1_595 | C6 | arCOG04110 | M | RfaG                                                                                                       | Glycosyltransferase                                                                                                                                | 311745690 | 239            | Bacteroidetes/Chlorobi group                     | Algoriphagus sp. PR1                        |
| Nst1_596 | C6 | arCOG03287 | G | GDB1                                                                                                       | Glycogen debranching enzyme                                                                                                                        | 48478310  | 112            | Euryarchaeota                                    | Picrophilus torridus DSM 9790               |
| Nst1_597 | C6 | arCOG03167 | R | R                                                                                                          | Predicted ATPase (AAA+ superfamily) fused to ArsR family HTH domain                                                                                | 149195221 | 65.9           | Proteobacteria                                   | Citrobacter mediatlanticus TB-2             |
| Nst1_598 | C6 | arCOG03962 | S | S                                                                                                          | Uncharacterized protein with SCP/PR1 domains                                                                                                       | 255513899 | 163            | Euryarchaeota                                    | Candidatus Micrarchaeum acidiphilum ARMAN-2 |
| Nst1_599 | C6 | arCOG00385 | S | S                                                                                                          | Uncharacterized conserved protein                                                                                                                  |           |                |                                                  |                                             |
| Nst1_600 | C6 | arCOG03580 | O | STE14                                                                                                      | Putative protein-S-isoprenylcysteine methyltransferase                                                                                             | 374632714 | 100            | Crenarchaeota                                    | Metallosphaera yellowstonensis MK1          |
| Nst1_601 | C6 | arCOG03672 | E | E                                                                                                          | Thermopsis-like protease                                                                                                                           | 307959469 | 244            | Crenarchaeota                                    | Vulcanisaeta distributa DSM 14429           |
| Nst1_602 | C6 | arCOG01239 | J | RsmE                                                                                                       | RNA base methyltransferase family enzyme                                                                                                           | 256811269 | 115            | Euryarchaeota                                    | Nanoarchaeum equitans Kin4-M                |
| Nst1_603 | C6 | arCOG04409 | R | R                                                                                                          | Predicted nuclease (RNase H fold)                                                                                                                  | 333988293 | 69.7           | Euryarchaeota                                    | Methanobacterium sp. SWAN-1                 |
| Nst1_604 | C7 |            |   | Uncharacterized protein                                                                                    |                                                                                                                                                    |           |                |                                                  |                                             |

|          |    |            |   |            |                                                                   |           |      |               |                                             |
|----------|----|------------|---|------------|-------------------------------------------------------------------|-----------|------|---------------|---------------------------------------------|
| Nst1_608 | C7 | arCOG04231 | P | CutA       | Uncharacterized protein involved in tolerance to divalent cations | 302348629 | 61.2 | Crenarchaeota | Acidilobus saccharovorans 345-15            |
| Nst1_609 | C7 | arCOG04449 | J | TruA       | Pseudouridylylase synthase                                        | 41615123  | 120  | Nanoarchaeota | Nanoarchaeum equitans Kin4-M                |
| Nst1_610 | C7 | arCOG04291 | S |            | Uncharacterized conserved protein                                 | 315230891 | 216  | Euryarchaeota | Thermococcus barophilus MP                  |
| Nst1_611 | C7 |            |   |            | Uncharacterized conserved protein                                 | 290558928 | 131  | Euryarchaeota | Candidatus Parvarchaeum acidophilus ARMAN-5 |
| Nst1_612 | C7 | arCOG00980 | O | SlpA       | FKBP-type peptidyl-prolyl cis-trans isomerase 2                   | 48477400  | 118  | Euryarchaeota | Picrophilus torridus DSM 9790               |
| Nst1_613 | C7 | arCOG02201 | D | FtsZ       | Cell division GTPase                                              | 41614929  | 357  | Nanoarchaeota | Nanoarchaeum equitans Kin4-M                |
| Nst1_614 | C7 | arCOG01920 | K | NusG       | Transcription antiterminator NusG                                 | 41615322  | 116  | Nanoarchaeota | Nanoarchaeum equitans Kin4-M                |
| Nst1_615 | C7 | arCOG02204 | U | Ssa1       | Preprotein translocase subunit Ssa1                               | 169861053 | 33.9 |               |                                             |
| Nst1_616 | C7 | arCOG04372 | J | RplK       | Ribosomal protein L11                                             | 256811381 | 187  | Euryarchaeota | Methanocaldococcus fervens AG86             |
| Nst1_617 | C7 |            |   |            | Uncharacterized protein                                           |           |      |               |                                             |
| Nst1_618 | C7 | arCOG04289 | J | RplA       | Ribosomal protein L1                                              | 41615328  | 191  | Nanoarchaeota | Nanoarchaeum equitans Kin4-M                |
| Nst1_619 | C7 | arCOG04288 | J | RplJ       | Ribosomal protein L10                                             | 41614888  | 176  | Nanoarchaeota | Nanoarchaeum equitans Kin4-M                |
| Nst1_620 | C7 |            |   |            | Uncharacterized protein                                           |           |      |               |                                             |
| Nst1_621 | C7 |            |   |            | Uncharacterized protein                                           |           |      |               |                                             |
| Nst1_622 | C7 | arCOG01241 | L | XerC       | Integrase                                                         | 332158066 | 201  | Euryarchaeota | Pyrococcus sp. NA2                          |
| Nst1_623 | C7 | arCOG05350 | S |            | Uncharacterized membrane protein                                  | 13541564  | 95.9 | Euryarchaeota | Thermoplasma volcanium GSS1                 |
| Nst1_624 | C7 | arCOG02721 | C | CydA       | Cytochrome bd-type quinol oxidase, subunit 1                      | 269986719 | 276  | Euryarchaeota | Candidatus Parvarchaeum acidophilum ARMAN-4 |
| Nst1_625 | C7 | arCOG04490 | E |            | Pyruvoyl-dependent arginine decarboxylase (Pvl/ArgDC)             | 284161469 | 149  | Euryarchaeota | Archaeoglobus profundus DSM 5631            |
| Nst1_626 | C7 | arCOG04254 | J | RpsG       | Ribosomal protein S7                                              | 41515036  | 253  | Nanoarchaeota | Nanoarchaeum equitans Kin4-M                |
| Nst1_627 | C7 | arCOG01572 | S | HN/A       | Uncharacterized conserved membrane protein                        | 126465119 | 72.8 | Crenarchaeota | Staphylothermus marinus F1                  |
| Nst1_628 | C7 | arCOG04255 | J | RpsL       | Ribosomal protein S12                                             | 41614854  | 213  | Nanoarchaeota | Nanoarchaeum equitans Kin4-M                |
| Nst1_629 | C7 | arCOG01752 | J | RPL30      | Ribosomal protein L30E                                            | 41614974  | 85.9 | Nanoarchaeota | Nanoarchaeum equitans Kin4-M                |
| Nst1_630 | C7 | arCOG04256 | K | RpoC/Rpo11 | DNA-directed RNA polymerase subunit A"                            | 41615213  | 285  | Nanoarchaeota | Nanoarchaeum equitans Kin4-M                |
| Nst1_631 | C7 | arCOG04257 | K | RpoC/Rpo3  | DNA-directed RNA polymerase subunit A'                            | 41615286  | 607  | Nanoarchaeota | Nanoarchaeum equitans Kin4-M                |
| Nst1_632 | C7 | arCOG01762 | K | RpoB/Rpo2  | DNA-directed RNA polymerase subunit B                             | 41614952  | 658  | Nanoarchaeota | Nanoarchaeum equitans Kin4-M                |
| Nst1_633 | C7 | arCOG01762 | K | RpoB/Rpo2  | DNA-directed RNA polymerase subunit B                             | 41614968  | 364  | Nanoarchaeota | Nanoarchaeum equitans Kin4-M                |
| Nst1_634 | C7 | arCOG04258 | K | RPB5       | DNA-directed RNA polymerase, subunit H, RpoH/RPB5                 | 14520829  | 100  | Euryarchaeota | Pyrococcus abyssii GE5                      |
| Nst1_635 | C7 | arCOG04178 | H | RimK       | Glutathione synthase/glutaminyl transferase/alpha-L-glutamylase   | 336122111 | 102  | Euryarchaeota | Methanothermococcus okainawensis IH1        |
| Nst1_636 | C7 | arCOG04171 | S |            | Uncharacterized conserved protein                                 | 332159137 | 152  | Euryarchaeota | Pyrococcus sp. NA2                          |
| Nst1_637 | C7 |            |   |            | Uncharacterized protein                                           |           |      |               |                                             |
| Nst1_638 | C7 | arCOG01814 | S |            | Uncharacterized conserved membrane protein                        | 359415798 | 225  | Euryarchaeota | Candidatus Haloredivivus sp. G17            |
| Nst1_639 | C7 |            |   |            | Uncharacterized protein                                           |           |      |               |                                             |
| Nst1_640 | C7 |            |   |            | Uncharacterized protein                                           |           |      |               |                                             |
| Nst1_641 | C7 |            |   |            | Membrane protein                                                  |           |      |               |                                             |
| Nst1_642 | C7 |            |   |            | Uncharacterized protein                                           |           |      |               |                                             |
| Nst1_643 | C7 | arCOG03611 | E |            | Peptidase C1A subfamily                                           | 118387500 | 76.6 |               |                                             |
| Nst1_644 | C7 |            |   |            | Uncharacterized membrane protein                                  | 11499529  | 46.2 | Euryarchaeota | Archaeoglobus fulgidus DSM 4304             |
| Nst1_645 | C7 |            |   |            | Uncharacterized protein                                           |           |      |               |                                             |
| Nst1_646 | C7 |            |   |            | Uncharacterized membrane protein                                  |           |      |               |                                             |
| Nst1_647 | C7 |            |   |            | Uncharacterized protein                                           |           |      |               |                                             |
| Nst1_648 | C7 |            |   |            | Uncharacterized protein                                           |           |      |               |                                             |
| Nst1_649 | C7 |            |   |            | Uncharacterized membrane protein                                  |           |      |               |                                             |
| Nst1_650 | C7 | arCOG04182 | J | RPS24A     | Ribosomal protein S24E                                            | 20092495  | 84   | Euryarchaeota | Methanosarcina acetivorans C2A              |
| Nst1_651 | C7 | arCOG04183 | J | RPS31      | Ribosomal protein S27AE                                           | 41614971  | 77   | Nanoarchaeota | Nanoarchaeum equitans Kin4-M                |
| Nst1_652 | C7 | arCOG03113 | S |            | Uncharacterized conserved protein                                 | 14590042  | 54.3 | Euryarchaeota | Pyrococcus horikoshii OT3                   |
| Nst1_653 | C7 |            |   |            | Uncharacterized protein                                           |           |      |               |                                             |
| Nst1_654 | C7 | arCOG09005 | L |            | Uracil-DNA glycosylase                                            | 41615161  | 244  | Nanoarchaeota | Nanoarchaeum equitans Kin4-M                |
| Nst1_655 | C7 | arCOG01700 | E | SpeB       | Arginase family enzyme                                            | 41615017  | 151  | Nanoarchaeota | Nanoarchaeum equitans Kin4-M                |
| Nst1_656 | C7 |            |   |            | Uncharacterized membrane protein                                  |           |      |               |                                             |
| Nst1_657 | C7 |            |   |            | Uncharacterized protein                                           |           |      |               |                                             |
| Nst1_658 | C7 |            |   |            | Uncharacterized protein                                           |           |      |               |                                             |
| Nst1_659 | C7 |            |   |            | Uncharacterized membrane protein                                  |           |      |               |                                             |

## Acd1

| Locus     | Contig | arCOG      | Symbol | Annotation | Best NR database hit                                                                                        | Blast Score | Best hit phylum | Best hit species |                                          |
|-----------|--------|------------|--------|------------|-------------------------------------------------------------------------------------------------------------|-------------|-----------------|------------------|------------------------------------------|
| Acd1_0001 | C1     | arCOG04348 | H      | UblE       | Methylese involved in ubiquitin/menaquinone biosynthesis                                                    | 227829884   | 567             | Crenarchaeota    | Sulfolobus islandicus L.S.2.15           |
| Acd1_0002 | C1     | arCOG00147 | G      | PrpP       | Permease of the major facilitator superfamily                                                               | 15922166    | 352             | Crenarchaeota    | Sulfolobus tokodaii str. 7               |
| Acd1_0003 | C1     | arCOG05912 | S      |            | Uncharacterized conserved protein                                                                           | 322796186   | 308             | Crenarchaeota    | Acidilobus hospitalis W1                 |
| Acd1_0004 | C1     | arCOG03117 | S      | DedA       | Uncharacterized membrane-associated protein, DedA family                                                    | 15999505    | 275             | Crenarchaeota    | Sulfolobus solfataricus P2               |
| Acd1_0005 | C1     | arCOG00144 | G      | PrpP       | Permease of the major facilitator superfamily                                                               | 374631136   | 255             | Crenarchaeota    | Metallosphaera yellowstonensis MK1       |
| Acd1_0006 | C1     | arCOG01568 | M      | MscS       | Small-conductance mechanosensitive channel                                                                  | 15897472    | 105             | Crenarchaeota    | Sulfolobus solfataricus P2               |
| Acd1_0007 | C1     |            |        |            | Uncharacterized protein                                                                                     | 313674004   | 1147            | Deferribacteres  | Calditerrivibrio nitroreducens DSM 19672 |
| Acd1_0008 | C1     |            |        |            | Uncharacterized protein                                                                                     | 385772957   | 306             | Crenarchaeota    | Sulfolobus islandicus HVE10.4            |
| Acd1_0009 | C1     | arCOG00184 | E      | AppF       | ABC-type oligopeptide transport system, ATPase component                                                    | 302349035   | 93.6            | Crenarchaeota    | Acidilobus saccharovorans 345-15         |
| Acd1_0010 | C1     | arCOG00181 | E      | DppD       | ABC-type dipeptide/oligopeptide/nickel transport system, ATPase component                                   | 302349034   | 511             | Crenarchaeota    | Acidilobus saccharovorans 345-15         |
| Acd1_0011 | C1     | arCOG00749 | E      | DppC       | ABC-type dipeptide/oligopeptide/nickel transport system, permease component                                 | 15988117    | 329             | Crenarchaeota    | Sulfolobus solfataricus P2               |
| Acd1_0012 | C1     | arCOG00751 | E      | DppB       | ABC-type dipeptide/oligopeptide/nickel transport system, permease component                                 | 284996874   | 48.9            | Crenarchaeota    | Sulfolobus islandicus L.D.8.5            |
| Acd1_0013 | C1     | arCOG01672 | R      | -          | Predicted solute binding protein                                                                            | 229583991   | 289             | Crenarchaeota    | Sulfolobus islandicus M.16.27            |
| Acd1_0014 | C1     | arCOG03639 | R      | -          | Predicted glutamine amidotransferase                                                                        | 15922166    | 693             | Crenarchaeota    | Sulfolobus tokodaii str. 7               |
| Acd1_0015 | C1     | arCOG02671 | E      | HRNAuCAA   | Thermopsis-like protease                                                                                    | 302348440   | 101             | Crenarchaeota    | Acidilobus saccharovorans 345-15         |
| Acd1_0016 | C1     | arCOG02007 | O      | -          | Highly conserved protein containing a thioredoxin domain                                                    | 330835123   | 90.1            | Crenarchaeota    | Metallosphaera cuprina Ar-4              |
| Acd1_0017 | C1     | arCOG01992 | T      | SixA       | Phosphohistidine phosphatase SixA                                                                           | 227829401   | 209             | Crenarchaeota    | Sulfolobus islandicus L.S.2.15           |
| Acd1_0018 | C1     | arCOG05138 | F      | GppA       | Exopolysphatase                                                                                             | 70607737    | 100             | Crenarchaeota    | Sulfolobus acidocaldarius DSM 639        |
| Acd1_0019 | C1     | arCOG01891 | F      | Tmk        | Thymidylate kinase                                                                                          | 146303757   | 588             | Crenarchaeota    | Metallosphaera sedula DSM 5348           |
| Acd1_0020 | C1     | arCOG01891 | F      | Tmk        | Thymidylate kinase                                                                                          | 332796138   | 461             | Crenarchaeota    | Acidilobus hospitalis W1                 |
| Acd1_0021 | C1     | arCOG07254 | S      | -          | Uncharacterized conserved protein                                                                           | 322796137   | 36.6            | Crenarchaeota    | Acidilobus hospitalis W1                 |
| Acd1_0022 | C1     | arCOG02007 | O      | -          | Highly conserved protein containing a thioredoxin domain                                                    | 227826432   | 99.4            | Crenarchaeota    | Sulfolobus islandicus M.14.25            |
| Acd1_0023 | C1     |            |        |            | Uncharacterized protein                                                                                     |             |                 |                  |                                          |
| Acd1_0024 | C1     | arCOG02053 | T      | UspA       | Nucleotide-binding protein, UspA family                                                                     | 332796769   | 260             | Crenarchaeota    | Acidilobus hospitalis W1                 |
| Acd1_0025 | C1     | arCOG00196 | V      | CcmA       | ABC-type multidrug transport system, ATPase component                                                       | 332796704   | 124             | Crenarchaeota    | Acidilobus hospitalis W1                 |
| Acd1_0026 | C1     | arCOG01467 | V      | -          | ABC-type multidrug transport system, permease component                                                     | 330835578   | 81.3            | Crenarchaeota    | Metallosphaera cuprina Ar-4              |
| Acd1_0027 | C1     | arCOG03665 | O      | -          | Subtilase family protease                                                                                   | 15922696    | 280             | Crenarchaeota    | Sulfolobus tokodaii str. 7               |
| Acd1_0028 | C1     | arCOG05967 | S      | -          | Uncharacterized conserved protein                                                                           | 146304134   | 475             | Crenarchaeota    | Metallosphaera sedula DSM 5348           |
| Acd1_0029 | C1     | arCOG01143 | T      | ApaH       | Serine/threonine protein phosphatase PP2A family                                                            | 15922699    | 360             | Crenarchaeota    | Sulfolobus tokodaii str. 7               |
| Acd1_0030 | C1     | arCOG00631 | R      | -          | CBS domain                                                                                                  | 70606127    | 684             | Crenarchaeota    | Sulfolobus acidocaldarius DSM 639        |
| Acd1_0031 | C1     |            |        |            | Uncharacterized protein                                                                                     |             |                 |                  |                                          |
| Acd1_0032 | C1     | arCOG07183 | R      | RfbX       | Polysaccharide biosynthesis protein, Mvin family                                                            | 330835691   | 192             | Crenarchaeota    | Metallosphaera cuprina Ar-4              |
| Acd1_0033 | C1     | arCOG05398 | M      | M          | Glycosyltransferase family A                                                                                | 227829763   | 172             | Crenarchaeota    | Sulfolobus islandicus L.S.2.15           |
| Acd1_0034 | C1     | arCOG07183 | R      | RfbX       | Polysaccharide biosynthesis protein, Mvin family                                                            | 374632870   | 1160            | Crenarchaeota    | Metallosphaera yellowstonensis MK1       |
| Acd1_0035 | C1     | arCOG00631 | R      | -          | CBS domain                                                                                                  | 227831149   | 114             | Crenarchaeota    | Sulfolobus islandicus L.S.2.15           |
| Acd1_0036 | C1     | arCOG00085 | F      | GuaA       | GMP synthase, PP-ATPase domain/subunit                                                                      | 15922676    | 300             | Crenarchaeota    | Sulfolobus tokodaii str. 7               |
| Acd1_0037 | C1     | arCOG05943 | M      | WcaA       | Glycosyltransferase                                                                                         | 22782727    | 383             | Crenarchaeota    | Sulfolobus islandicus M.14.25            |
| Acd1_0038 | C1     | arCOG01105 | H      | CobQ       | Cobyrinic acid synthase                                                                                     | 342306699   | 397             | Crenarchaeota    | Sulfolobus tokodaii str. 7               |
| Acd1_0039 | C1     | arCOG06404 | Q      | Q          | 2-keto-4-pentenoate hydratase                                                                               | 15920297    | 157             | Crenarchaeota    | Sulfolobus tokodaii str. 7               |
| Acd1_0040 | C1     | arCOG01459 | E      | Tdh        | Threonine dehydrogenase or related Zn-dependent dehydrogenase                                               | 332796749   | 256             | Crenarchaeota    | Acidilobus hospitalis W1                 |
| Acd1_0041 | C1     | arCOG04274 | H      | CdB        | Cobalamin biosynthesis protein CobD/CdB                                                                     | 70606249    | 264             | Crenarchaeota    | Sulfolobus acidocaldarius DSM 639        |
| Acd1_0042 | C1     | arCOG04338 | H      | CobS       | Cobalamin-S-phosphate synthase                                                                              | 227828389   | 1201            | Crenarchaeota    | Sulfolobus islandicus M.14.25            |
| Acd1_0043 | C1     | arCOG00985 | J      | -          | Predicted RNA-binding protein (contains PUA domain)                                                         | 15899938    | 306             | Crenarchaeota    | Sulfolobus solfataricus P2               |
| Acd1_0044 | C1     | arCOG00643 | E      | SeiD       | Selenophosphate synthase                                                                                    | 374632205   | 264             | Crenarchaeota    | Metallosphaera yellowstonensis MK1       |
| Acd1_0045 | C1     | arCOG05961 | K      | TrpR       | Mn-dependent transcriptional regulator (TrpR family)                                                        | 332796744   | 456             | Crenarchaeota    | Acidilobus hospitalis W1                 |
| Acd1_0046 | C1     | arCOG01035 | E      | -          | Alanine dehydrogenase, mu-crystallin homolog                                                                | 332796743   | 45.4            | Crenarchaeota    | Acidilobus hospitalis W1                 |
| Acd1_0047 | C1     | arCOG00492 | K      | AR08       | Transcriptional regulators containing a DNA-binding HTH domain and an aminotransferase domain (MocX family) | 15922665    | 406             | Crenarchaeota    | Sulfolobus tokodaii str. 7               |
| Acd1_0048 | C1     | arCOG00324 | R      | AcuC       | Deacetylase, including yeast histone deacetylase and acetoacetyl utilization protein                        | 15922657    | 738             | Crenarchaeota    | Sulfolobus tokodaii str. 7               |
| Acd1_0049 | C1     | arCOG00679 | L      | -          | Transposase                                                                                                 | 15922658    | 461             | Crenarchaeota    | Sulfolobus tokodaii str. 7               |
| Acd1_0050 | C1     |            |        |            | Uncharacterized protein                                                                                     |             |                 |                  |                                          |
| Acd1_0051 | C1     | arCOG03639 | R      | -          | Predicted glutamine amidotransferase                                                                        | 374632921   | 550             | Crenarchaeota    | Metallosphaera yellowstonensis MK1       |
| Acd1_0052 | C1     | arCOG00500 | R      | ElaC       | Metal-dependent hydrolase of the beta-lactamase superfamily                                                 | 15922660    | 333             | Crenarchaeota    | Sulfolobus tokodaii str. 7               |
| Acd1_0053 | C1     |            |        |            | Uncharacterized protein                                                                                     |             |                 |                  |                                          |
| Acd1_0054 | C1     | arCOG03768 | S      | O          | Uncharacterized conserved protein                                                                           | 70607799    | 449             | Crenarchaeota    | Sulfolobus acidocaldarius DSM 639        |
| Acd1_0055 | C1     | arCOG01154 | R      | -          | Calcineurin-like phosphoesterase superfamily protein                                                        | 229579815   | 745             | Crenarchaeota    | Sulfolobus islandicus Y.G.57.14          |
| Acd1_0056 | C1     | arCOG00014 | G      | RbsK       | Sugar kinase, ribokinase family                                                                             | 15989975    | 123             | Crenarchaeota    | Sulfolobus solfataricus P2               |
| Acd1_0057 | C1     | arCOG01389 | M      | M          | Glycosyltransferase                                                                                         | 70806112    | 159             | Crenarchaeota    | Sulfolobus acidocaldarius DSM 639        |
| Acd1_0058 | C1     | arCOG01189 | G      | -          | Uncharacterized conserved protein                                                                           | 15922664    | 589             | Crenarchaeota    | Sulfolobus tokodaii str. 7               |
| Acd1_0059 | C1     | arCOG07177 | S      | -          | Uncharacterized conserved protein                                                                           | 330835749   | 32              | Crenarchaeota    | Metallosphaera cuprina Ar-4              |
| Acd1_     |        |            |        |            |                                                                                                             |             |                 |                  |                                          |

|           |    |            |   |            |                                                                                                                |           |      |               |                                    |
|-----------|----|------------|---|------------|----------------------------------------------------------------------------------------------------------------|-----------|------|---------------|------------------------------------|
| Acd1_0074 | C1 | arCOG0324  | R | AuC        | Deacetylase, including yeast histone deacetylase and acetoacetyl utilization protein                           | 15922628  | 151  | Crenarchaeota | Sulfolobus tokodaii str. 7         |
| Acd1_0075 | C1 | arCOG00601 | R | -          | Protein containing two CBS domains (some fused to C-terminal double-stranded RNA-binding domain of Rbf family) | 70606054  | 165  | Crenarchaeota | Sulfolobus acidocaldarius DSM 639  |
| Acd1_0076 | C1 | arCOG00602 | R | -          | Predicted amidohydrolase                                                                                       | 374632286 | 142  | Crenarchaeota | Metallosphaera yellowstonensis MK1 |
| Acd1_0077 | C1 | arCOG05904 | R | -          | Uncharacterized conserved protein                                                                              | 70606052  | 452  | Crenarchaeota | Sulfolobus acidocaldarius DSM 639  |
| Acd1_0078 | C1 | arCOG0334  | C | GlcD       | FAD/FMN-containing dehydrogenase                                                                               | 342306689 | 656  | Crenarchaeota | Sulfolobus tokodaii str. 7         |
| Acd1_0079 | C1 | arCOG00337 | C | GlcD       | FAD/FMN-containing dehydrogenase                                                                               | 146303336 | 139  | Crenarchaeota | Metallosphaera sedula DSM 5348     |
| Acd1_0080 | C1 | arCOG00333 | C | GlcC       | Fe-S oxidoreductase                                                                                            | 15922827  | 259  | Crenarchaeota | Sulfolobus tokodaii str. 7         |
| Acd1_0081 | C1 | arCOG00586 | D | Soj        | ATPase involved in chromosome partitioning, ParA family                                                        | 70606046  | 424  | Crenarchaeota | Sulfolobus acidocaldarius DSM 639  |
| Acd1_0082 | C1 | arCOG04886 | S | -          | Uncharacterized conserved protein                                                                              | 70606045  | 133  | Crenarchaeota | Sulfolobus acidocaldarius DSM 639  |
| Acd1_0083 | C1 | arCOG01389 | M | -          | Glycosyltransferase                                                                                            | 15922623  | 192  | Crenarchaeota | Sulfolobus tokodaii str. 7         |
| Acd1_0084 | C1 | arCOG00666 | M | GCD1       | N-acetylglucosamine-1-phosphate uridylyltransferase                                                            | 15922616  | 696  | Crenarchaeota | Sulfolobus tokodaii str. 7         |
| Acd1_0085 | C1 | arCOG01437 | P | SodA       | Superoxide dismutase                                                                                           | 15922615  | 1218 | Crenarchaeota | Sulfolobus tokodaii str. 7         |
| Acd1_0086 | C1 | arCOG01298 | S | -          | Uncharacterized conserved membrane protein                                                                     | 15922614  | 574  | Crenarchaeota | Sulfolobus tokodaii str. 7         |
| Acd1_0087 | C1 | arCOG04235 | O | -          | Predicted thioredoxin/glutaredoxin                                                                             | 15922612  | 87   | Crenarchaeota | Sulfolobus tokodaii str. 7         |
| Acd1_0088 | C1 | arCOG00770 | K | DinG       | Rad3-related DNA helicase                                                                                      | 15922611  | 227  | Crenarchaeota | Sulfolobus tokodaii str. 7         |
| Acd1_0089 | C1 | arCOG08334 | S | -          | Uncharacterized conserved protein                                                                              | 146304616 | 573  | Crenarchaeota | Metallosphaera sedula DSM 5348     |
| Acd1_0090 | C1 | arCOG02853 | P | (NirD)     | Ferredoxin subunit of nitrite reductase or ring-hydroxylating dioxygenase                                      | 15922610  | 264  | Crenarchaeota | Sulfolobus tokodaii str. 7         |
| Acd1_0091 | C1 | arCOG02097 | E | AroD       | 3-dehydroquinate dehydratase                                                                                   | 30566127  | 49.3 | Crenarchaeota | Ignisphaera aggregans DSM 17230    |
| Acd1_0092 | C1 | arCOG04134 | E | AroA       | 5-enolpyruvylshikimate-3-phosphate synthase                                                                    | 15922608  | 122  | Crenarchaeota | Sulfolobus tokodaii str. 7         |
| Acd1_0093 | C1 | arCOG01025 | E | -          | Archaical shikimate kinase                                                                                     | 15922607  | 398  | Crenarchaeota | Sulfolobus tokodaii str. 7         |
| Acd1_0094 | C1 | arCOG04133 | E | AroC       | Chorismate synthase                                                                                            | 15922605  | 108  | Crenarchaeota | Sulfolobus tokodaii str. 7         |
| Acd1_0095 | C1 | arCOG01033 | E | AroE       | Shikimate 5-dehydrogenase                                                                                      | 332796905 | 453  | Crenarchaeota | Acidianus hospitalis W1            |
| Acd1_0096 | C1 | arCOG00983 | E | AroB       | 3-dehydroquinate synthase                                                                                      | 15897247  | 598  | Crenarchaeota | Sulfolobus solfataricus P2         |
| Acd1_0097 | C1 | arCOG01049 | E | AroA       | 3-deoxy-D-arabino-heptulosonate 7-phosphate (DAH7P) synthase                                                   | 15922602  | 607  | Crenarchaeota | Sulfolobus tokodaii str. 7         |
| Acd1_0098 | C1 | arCOG02098 | E | PheA       | Chorismate mutase                                                                                              | 374634119 | 216  | Crenarchaeota | Metallosphaera yellowstonensis MK1 |
| Acd1_0099 | C1 | arCOG01051 | G | -          | Transketolase, C-terminal subunit                                                                              | 70606023  | 41.2 | Crenarchaeota | Sulfolobus acidocaldarius DSM 639  |
| Acd1_0100 | C1 | arCOG01053 | G | -          | Transketolase, N-terminal subunit                                                                              | 15897243  | 147  | Crenarchaeota | Sulfolobus solfataricus P2         |
| Acd1_0101 | C1 | arCOG01676 | H | ThiF       | Dinucleotide-utilizing enzyme involved in molybdopterin and thiamine biosynthesis                              | 332796901 | 107  | Crenarchaeota | Acidianus hospitalis W1            |
| Acd1_0102 | C1 | arCOG05903 | S | -          | Uncharacterized conserved membrane protein                                                                     | 70606020  | 194  | Crenarchaeota | Sulfolobus acidocaldarius DSM 639  |
| Acd1_0103 | C1 | arCOG00427 | L | RecJ/Ctd45 | Single-stranded DNA-specific exonuclease RecJ                                                                  | 70606019  | 171  | Crenarchaeota | Sulfolobus acidocaldarius DSM 639  |
| Acd1_0104 | C1 | arCOG01354 | J | -          | Subunit of KEOPS complex (Ggi121BDU32KAE1)                                                                     | 146304631 | 75.9 | Crenarchaeota | Metallosphaera sedula DSM 5348     |
| Acd1_0105 | C1 | arCOG04113 | J | RpiP       | Ribosomal protein L10A/L16                                                                                     | 15922595  | 337  | Crenarchaeota | Metallosphaera sedula DSM 5348     |
| Acd1_0106 | C1 | arCOG04112 | J | DPH2       | Diphthamide synthase subunit DPH2                                                                              | 374634179 | 270  | Crenarchaeota | Metallosphaera yellowstonensis MK1 |
| Acd1_0107 | C1 | arCOG00676 | J | -          | Predicted RNA-binding protein (consists of S1 domain and a Zn-ribbon domain)                                   | 15922593  | 336  | Crenarchaeota | Sulfolobus tokodaii str. 7         |
| Acd1_0108 | C1 | arCOG04111 | K | RPB11      | DNA-directed RNA polymerase, subunit L                                                                         | 15922592  | 803  | Crenarchaeota | Sulfolobus tokodaii str. 7         |
| Acd1_0109 | C1 | arCOG01716 | S | -          | Uncharacterized conserved protein                                                                              | 70606014  | 92.4 | Crenarchaeota | Sulfolobus acidocaldarius DSM 639  |
| Acd1_0110 | C1 | arCOG00579 | K | RPB9       | DNA-directed RNA polymerase, subunit M/Transcription elongation factor                                         | 332796909 | 52   | Crenarchaeota | Acidianus hospitalis W1            |
| HRNAArgCT |    |            |   |            | TYIS                                                                                                           | 332796909 | 52   | Crenarchaeota | Acidianus hospitalis W1            |
| Acd1_0111 | C1 | arCOG02298 | N | PuO        | Peptidase A24A, prelinin type IV                                                                               | 15922589  | 38.9 | Crenarchaeota | Sulfolobus tokodaii str. 7         |
| Acd1_0112 | C1 | arCOG01707 | I | CalA       | Acyl-CoA dehydrogenase                                                                                         | 15922588  | 119  | Crenarchaeota | Sulfolobus tokodaii str. 7         |
| Acd1_0114 | C1 | arCOG00238 | P | ArsB       | Na <sup>+</sup> /H <sup>+</sup> antiporter NhaD or related arsenite permease                                   | 15922587  | 598  | Crenarchaeota | Sulfolobus tokodaii str. 7         |
| Acd1_0113 | C1 | arCOG01133 | S | -          | Uncharacterized protein                                                                                        | 70605988  | 270  | Crenarchaeota | Sulfolobus tokodaii str. 7         |
| Acd1_0115 | C1 | arCOG00131 | G | ProP       | Permease of the major facilitator superfamily                                                                  | 15922583  | 419  | Crenarchaeota | Sulfolobus acidocaldarius DSM 639  |
| Acd1_0116 | C1 | arCOG00773 | I | -          | Acyl-CoA hydrolase                                                                                             | 15922582  | 40.8 | Crenarchaeota | Sulfolobus tokodaii str. 7         |
| Acd1_0117 | C1 | arCOG05897 | S | -          | Uncharacterized conserved protein                                                                              | 15922582  | 40.8 | Crenarchaeota | Sulfolobus tokodaii str. 7         |
| Acd1_0118 | C1 | arCOG00284 | L | -          | HerA helicase                                                                                                  | 342306681 | 116  | Crenarchaeota | Sulfolobus tokodaii str. 7         |
| Acd1_0119 | C1 | arCOG03287 | L | -          | Predicted Nurk-like nuclease                                                                                   | 70605992  | 239  | Crenarchaeota | Sulfolobus acidocaldarius DSM 639  |
| Acd1_0120 | C1 | arCOG01069 | P | -          | CoA-dependent NAD(P)H Sulfur Oxidoreductase                                                                    | 15922579  | 404  | Crenarchaeota | Sulfolobus tokodaii str. 7         |
| Acd1_0121 | C1 | arCOG05888 | S | -          | Uncharacterized conserved protein                                                                              | 227826504 | 301  | Crenarchaeota | Sulfolobus islandicus M.14.25      |
| Acd1_0122 | C1 | arCOG00552 | G | Pgi        | Glucose-6-phosphate isomerase                                                                                  | 70605995  | 355  | Crenarchaeota | Sulfolobus acidocaldarius DSM 639  |
| Acd1_0123 | C1 | arCOG00486 | J | CysS       | Cysteine-lyase synthetase                                                                                      | 15922576  | 797  | Crenarchaeota | Sulfolobus tokodaii str. 7         |
| Acd1_0124 | C1 | arCOG01075 | F | -          | NUDX family hydrolase                                                                                          | 15922575  | 534  | Crenarchaeota | Sulfolobus tokodaii str. 7         |
| Acd1_0125 | C1 | arCOG05893 | F | -          | Cell surface protein                                                                                           | 15989045  | 111  | Crenarchaeota | Sulfolobus solfataricus P2         |
| Acd1_0126 | C1 | arCOG01352 | E | GdhA       | Glutamate dehydrogenase/leucine dehydrogenase                                                                  | 332796180 | 257  | Crenarchaeota | Acidianus hospitalis W1            |
| Acd1_0127 | C1 | arCOG02718 | S | -          | Predicted membrane protein                                                                                     | 70606000  | 75.1 | Crenarchaeota | Sulfolobus acidocaldarius DSM 639  |
| Acd1_0128 | C1 | arCOG03239 | R | -          | ATPase, predicted component of phase defense system                                                            | 15922571  | 81.3 | Crenarchaeota | Sulfolobus tokodaii str. 7         |
| Acd1_0129 | C1 | arCOG01260 | I | FabG       | Short-chain alcohol dehydrogenase                                                                              | 146304820 | 142  | Crenarchaeota | Metallosphaera sedula DSM 5348     |
| Acd1_0130 | C1 | arCOG00905 | L | -          | Uracil-DNA glycosylase                                                                                         | 70606003  | 97.1 | Crenarchaeota | Sulfolobus acidocaldarius DSM 639  |
| Acd1_0131 | C1 | arCOG0834  | S | -          | Uncharacterized conserved protein                                                                              | 227826492 | 100  | Crenarchaeota | Sulfolobus islandicus M.14.25      |
| Acd1_0132 | C1 | arCOG02050 | R | -          | Predicted permease                                                                                             | 15922568  | 564  | Crenarchaeota | Sulfolobus tokodaii str. 7         |
| Acd1_0133 | C1 | arCOG02100 | K | TrpR       | Mn-dependent transcriptional regulator (DtxR family)                                                           | 374633922 | 519  | Crenarchaeota | Metallosphaera yellowstonensis MK1 |
| Acd1_0134 | C1 | arCOG01927 | C | CoxG       | Carbon monoxide dehydrogenase subunit G, CoxG                                                                  | 70606705  | 362  | Crenarchaeota | Sulfolobus acidocaldarius DSM 639  |
| Acd1_0135 | C1 | arCOG04172 | E | DpaP       | Dihydrodipicolinate synthase/N-acetylneuraminate lyase                                                         | 15922566  | 121  | Crenarchaeota | Sulfolobus tokodaii str. 7         |
| Acd1_0136 | C1 | arCOG01351 | S | -          | Uncharacterized protein                                                                                        | 70605992  | 239  | Crenarchaeota | Sulfolobus tokodaii str. 7         |
| Acd1_0137 | C1 | arCOG05900 | K | -          | Predicted transcriptional regulator                                                                            | 284175093 | 427  | Crenarchaeota | Sulfolobus solfataricus 98/2       |
| Acd1_0138 | C1 | arCOG08479 | S | -          | Uncharacterized conserved protein                                                                              | 330835136 | 77.4 | Crenarchaeota | Metallosphaera cuprina Ar-4        |
| Acd1_0139 | C1 | arCOG01749 | C | FumC       | Fumarase                                                                                                       | 15922343  | 160  | Crenarchaeota | Sulfolobus tokodaii str. 7         |
| Acd1_0140 | C1 | arCOG01074 | L | MutT       | NUDX family hydrolase                                                                                          | 15922344  | 680  | Crenarchaeota | Sulfolobus tokodaii str. 7         |
| Acd1_0141 | C1 | arCOG01955 | P | KefB       | Kef-type K <sup>+</sup> transport system, membrane component fused TrkA K <sup>+</sup> transport system        | 15922347  | 316  | Crenarchaeota | Sulfolobus tokodaii str. 7         |
| Acd1_0142 | C1 | arCOG04409 | R | -          | Predicted nuclease (RNase H fold)                                                                              | 70605965  | 122  | Crenarchaeota | Sulfolobus acidocaldarius DSM 639  |
| Acd1_0143 | C1 | arCOG01087 | G | TpiA       | Triosephosphate isomerase                                                                                      | 332796584 | 380  | Crenarchaeota | Acidianus hospitalis W1            |
| Acd1_0144 | C1 | arCOG07119 | P | -          | Uncharacterized conserved protein                                                                              | 15899322  | 139  | Crenarchaeota | Sulfolobus solfataricus P2         |
| Acd1_0145 | C1 | arCOG02024 | P | ModA       | ABC-type molybdate transport system, periplasmic component                                                     | 146304543 | 122  | Crenarchaeota | Metallosphaera sedula DSM 5348     |
| Acd1_0146 | C1 | arCOG04170 | G | GdkA       | Putative glycine kinase                                                                                        | 15922355  | 105  | Crenarchaeota | Sulfolobus tokodaii str. 7         |
| Acd1_0147 | C1 | arCOG05388 | K | -          | Predicted transcriptional regulator, contains HTH domain                                                       | 15922356  | 58.9 | Crenarchaeota | Sulfolobus tokodaii str. 7         |
| Acd1_0148 | C1 | arCOG02099 | K | TrpR       | Mn-dependent transcriptional regulator (DtxR family)                                                           | 146304764 | 131  | Crenarchaeota | Metallosphaera sedula DSM 5348     |
| Acd1_0149 | C1 | arCOG05894 | S | -          | Uncharacterized conserved protein                                                                              | 15897578  | 174  | Crenarchaeota | Sulfolobus solfataricus P2         |
| Acd1_0150 | C1 | arCOG01776 | Q | -          | SAM-dependent methyltransferase                                                                                | 15922360  | 478  | Crenarchaeota | Sulfolobus tokodaii str. 7         |
| Acd1_0151 | C1 | arCOG00552 | H | MobB       | Molybdopterin-guanine dinucleotide biosynthesis protein                                                        | 15922362  | 651  | Crenarchaeota | Sulfolobus tokodaii str. 7         |
| Acd1_0152 | C1 | arCOG00216 | H | MoeA       | Molybdopterin biosynthesis enzyme                                                                              | 70605954  | 485  | Crenarchaeota | Sulfolobus acidocaldarius DSM 639  |
| Acd1_0153 | C1 | arCOG01872 | H | MobA       | Molybdopterin-guanine dinucleotide biosynthesis protein A                                                      | 15897584  | 347  | Crenarchaeota | Sulfolobus solfataricus P2         |
| Acd1_0154 | C1 | arCOG01631 | Q | -          | SAM-dependent methyltransferase                                                                                | 70605952  | 190  | Crenarchaeota | Sulfolobus acidocaldarius DSM 639  |
| Acd1_0155 | C1 | arCOG00035 | R | -          | Predicted ATPase of PP-loop superfamily                                                                        | 332796243 | 280  | Crenarchaeota | Acidianus hospitalis W1            |
| Acd1_0156 | C1 | arCOG00695 | F | SsnA       | Cytosine deaminase or related metal-dependent hydrolase                                                        | 332796244 | 144  | Crenarchaeota | Acidianus hospitalis W1            |
| Acd1_0157 | C1 | arCOG02242 | K | -          | Transcriptional regulator, contains HTH domain                                                                 | 332796245 | 64.7 | Crenarchaeota | Acidianus hospitalis W1            |
| Acd1_0158 | C1 | arCOG00817 | K | AbrB       | Transcriptional regulator AbrB                                                                                 | 15922369  | 758  | Crenarchaeota | Sulfolobus tokodaii str. 7         |
| Acd1_0159 | C1 | arCOG00891 | L | TatD       | Mg-dependent DNase                                                                                             | 332796247 | 638  | Crenarchaeota | Acidianus hospitalis W1            |
| Acd1_0160 | C1 | arCOG05892 | C | -          | Terminal oxidase, subunit doxI                                                                                 | 15922371  | 267  | Crenarchaeota | Sulfolobus tokodaii str. 7         |
| Acd1_0161 | C1 | arCOG05891 | C | -          | Terminal oxidase, subunit doxII                                                                                | 15922372  | 664  | Crenarchaeota | Sulfolobus tokodaii str. 7         |
| Acd1_0162 | C1 | arCOG01238 | C | CyB/DoxB   | Heme/copper-type cytochrome/oxidase, subunit 1                                                                 | 15922373  | 373  | Crenarchaeota | Sulfolobus tokodaii str. 7         |
| HRNAArgCT |    |            |   |            | IRNAsRGCT                                                                                                      | 15922373  | 373  | Crenarchaeota | Sulfolobus tokodaii str. 7         |
| Acd1_0163 | C1 | arCOG01456 | C | AdhC       | Zn-dependent alcohol dehydrogenase                                                                             | 15922376  | 479  | Crenarchaeota | Sulfolobus tokodaii str. 7         |
| Acd1_0164 | C1 | arCOG03199 | M | Rfe        | UDP-N-acetylmuramyl pentapeptide phosphotransferase/UDP-N-acetylglucosamine-1-phosphate transferase            | 330834020 | 324  | Crenarchaeota | Metallosphaera cuprina Ar-4        |
| Acd1_0165 | C1 | arCOG01726 | H | IspA       | Geranylgeranyl pyrophosphate synthase                                                                          | 70605942  | 630  | Crenarchaeota | Sulfolobus acidocaldarius DSM 639  |
| Acd1_0166 | C1 | arCOG00613 | H | Idi        | Isopentenyl diphosphate isomerase                                                                              | 227828216 | 225  | Crenarchaeota | Sulfolobus islandicus M.14.25      |
| Acd1_0167 | C1 | arCOG00613 | H | Idi        | Isopentenyl diphosphate isomerase                                                                              | 15922379  | 250  | Crenarchaeota | Sulfolobus tokodaii str. 7         |
| Acd1_0168 | C1 | arCOG05890 | S | -          | Uncharacterized conserved protein                                                                              | 15922381  | 93.2 | Crenarchaeota | Sulfolobus tokodaii str. 7         |
| Acd1_0169 | C1 | arCOG01728 | R | -          | Predicted dioxygenase                                                                                          | 15922382  | 65.5 | Crenarchaeota | Sulfolobus tokodaii str. 7         |
| Acd1_0170 | C1 | arCOG04245 | J | RpsB       | Ribosomal protein S2                                                                                           | 70605938  | 520  | Crenarchaeota | Sulfolobus acidocaldarius DSM 639  |
| Acd1_0171 | C1 | arCOG04244 | K | RPB10      | DNA-directed RNA polymerase, subunit N (RpoN/RPB10)                                                            | 15897034  | 87   | Crenarchaeota | Sulfolobus solfataricus P2         |
| Acd1_0172 | C1 | arCOG04243 | J | RpsI       | Ribosomal protein S9                                                                                           | 15922385  | 158  | Crenarchaeota | Sulfolobus tokodaii str. 7         |
| Acd1_0173 | C1 | arCOG04242 | J | RplM       | Ribosomal protein L13                                                                                          | 332796344 | 291  | Crenarchaeota | Acidianus hospitalis W1            |
| Acd1_0174 | C1 | arCOG00780 | J | RPL18A     | Ribosomal protein L18E                                                                                         | 159223    |      |               |                                    |

|             |    |            |   |       |                                                                                                                 |           |      |               |                                    |
|-------------|----|------------|---|-------|-----------------------------------------------------------------------------------------------------------------|-----------|------|---------------|------------------------------------|
| Acd1_0200   | C1 | arCOG01648 | R | MhpC  | Alpha/beta superfamily hydrolase                                                                                | 15922425  | 248  | Crenarchaeota | Sulfolobus tokodaii str. 7         |
| Acd1_0201   | C1 | arCOG04435 | G | -     | Phosphoenolpyruvate carboxylase                                                                                 | 160380584 | 86.7 | Crenarchaeota | Sulfolobus acidocaldarius DSM 639  |
| Acd1_0202   | C1 | arCOG00310 | O | Bcp   | Peroxiredoxin                                                                                                   | 15922428  | 226  | Crenarchaeota | Sulfolobus tokodaii str. 7         |
| Acd1_0203   | C1 | arCOG00018 | G | -     | Predicted sugar kinase                                                                                          | 332797957 | 31.6 | Crenarchaeota | Acidianus hospitalis W1            |
| Acd1_0204   | C1 | arCOG01106 | S | -     | Uncharacterized conserved protein                                                                               | 70605908  | 319  | Crenarchaeota | Sulfolobus acidocaldarius DSM 639  |
| Acd1_0205   | C1 | arCOG01098 | S | -     | Uncharacterized conserved protein                                                                               | 70605907  | 463  | Crenarchaeota | Sulfolobus acidocaldarius DSM 639  |
| Acd1_0206   | C1 | arCOG02080 | L | -     | HerA helicase                                                                                                   | 70605906  | 384  | Crenarchaeota | Sulfolobus acidocaldarius DSM 639  |
| Acd1_0207   | C1 | arCOG00397 | L | SbcD  | DNA repair exonuclease, SbcD                                                                                    | 15899023  | 371  | Crenarchaeota | Sulfolobus solfataricus P2         |
| Acd1_0208   | C1 | arCOG00368 | S | SbcC  | ATPase involved in DNA repair, SbcC                                                                             | 332797961 | 110  | Crenarchaeota | Acidianus hospitalis W1            |
| Acd1_0209   | C1 | arCOG00367 | L | -     | NurA 5'-3' nuclease                                                                                             | 15922435  | 284  | Crenarchaeota | Sulfolobus tokodaii str. 7         |
| Acd1_0210   | C1 | arCOG01773 | Q | -     | SAM-dependent methyltransferase                                                                                 | 330835099 | 244  | Crenarchaeota | Metallosphaera cuprina Ar-4        |
| Acd1_0211   | C1 | arCOG00600 | R | -     | CBS domain                                                                                                      | 15922439  | 150  | Crenarchaeota | Sulfolobus tokodaii str. 7         |
| Acd1_0212   | C1 | arCOG04373 | S | -     | Uncharacterized conserved protein                                                                               | 15922440  | 283  | Crenarchaeota | Sulfolobus tokodaii str. 7         |
| Acd1_0213   | C1 | arCOG01868 | P | Fur   | Fe <sup>2+</sup> /Zn <sup>2+</sup> uptake regulation protein, fur/PerR                                          | 332797968 | 316  | Crenarchaeota | Acidianus hospitalis W1            |
| Acd1_0214   | C1 | arCOG04558 | F | URH1  | Inosine-uridine nucleoside N-ribosyltransferase                                                                 | 15922442  | 224  | Crenarchaeota | Sulfolobus tokodaii str. 7         |
| Acd1_0215   | C1 | arCOG00373 | F | -     | DNA sulfur modification protein DndD, ATPase                                                                    | 332797970 | 234  | Crenarchaeota | Acidianus hospitalis W1            |
| Acd1_0216   | C1 | arCOG05886 | S | -     | Uncharacterized conserved protein                                                                               | 15899012  | 270  | Crenarchaeota | Sulfolobus solfataricus P2         |
| Acd1_0217   | C1 | arCOG00631 | R | -     | CBS domain                                                                                                      | 15922445  | 534  | Crenarchaeota | Sulfolobus tokodaii str. 7         |
| Acd1_0218   | C1 | arCOG01991 | R | phoE  | Broad specificity phosphatase PhoE or related phosphatase                                                       | 332797974 | 127  | Crenarchaeota | Acidianus hospitalis W1            |
| Acd1_0219   | C1 | arCOG01616 | J | GEX1  | D-amino acid/uracil decarboxylase, involved in ethanol tolerance                                                | 332797975 | 327  | Crenarchaeota | Acidianus hospitalis W1            |
| Acd1_0220   | C1 | arCOG01972 | O | TrxA  | Thiol-disulfide isomerase or thioredoxin                                                                        | 15922449  | 101  | Crenarchaeota | Sulfolobus tokodaii str. 7         |
| Acd1_0221   | C1 | arCOG05323 | S | -     | Uncharacterized conserved protein                                                                               | 15922450  | 650  | Crenarchaeota | Sulfolobus tokodaii str. 7         |
| Acd1_0222   | C1 | arCOG01221 | F | -     | Inosine/xanthosine triphosphatase                                                                               | 70605892  | 211  | Crenarchaeota | Sulfolobus acidocaldarius DSM 639  |
| Acd1_0223   | C1 | -          | - | -     | Uncharacterized protein                                                                                         | -         | -    | -             | -                                  |
| Acd1_0224   | C1 | arCOG00372 | S | -     | Uncharacterized conserved protein                                                                               | 70605889  | 29.6 | Crenarchaeota | Sulfolobus acidocaldarius DSM 639  |
| Acd1_0225   | C1 | arCOG03765 | S | -     | Uncharacterized conserved membrane protein                                                                      | 70605888  | 146  | Crenarchaeota | Sulfolobus acidocaldarius DSM 639  |
| Acd1_0225.1 | C1 | arCOG04142 | J | MraI  | EMG1/NEP1 rRNA methyltransferase                                                                                | 330835210 | 122  | Crenarchaeota | Metallosphaera cuprina Ar-4        |
| Acd1_0226   | C1 | arCOG04355 | J | RPR2  | RNase P subunit RPR2                                                                                            | 227826453 | 69.2 | Crenarchaeota | Sulfolobus islandicus M.14.25      |
| Acd1_0227   | C1 | arCOG01346 | J | -     | Predicted RNA-binding protein containing KH domain, possibly ribosomal protein                                  | 227826452 | 176  | Crenarchaeota | Sulfolobus islandicus M.14.25      |
| Acd1_0228   | C1 | arCOG00411 | S | -     | Uncharacterized conserved protein                                                                               | 70605884  | 122  | Crenarchaeota | Sulfolobus acidocaldarius DSM 639  |
| Acd1_0229   | C1 | arCOG00033 | J | TrmS  | Wybutosine (W) biosynthesis enzyme, TrmS methyltransferase                                                      | 70605883  | 747  | Crenarchaeota | Sulfolobus acidocaldarius DSM 639  |
| Acd1_0230   | C1 | arCOG01296 | O | TrxB  | Thioredoxin reductase                                                                                           | 15922460  | 347  | Crenarchaeota | Sulfolobus tokodaii str. 7         |
| Acd1_0231   | C1 | arCOG05885 | S | -     | Uncharacterized conserved protein                                                                               | 166303525 | 538  | Crenarchaeota | Metallosphaera sedula DSM 5348     |
| Acd1_0232   | C1 | arCOG01348 | H | nadP  | NAD kinase                                                                                                      | 15922463  | 238  | Crenarchaeota | Sulfolobus tokodaii str. 7         |
| Acd1_0233   | C1 | arCOG00721 | J | NobI  | Endonuclease NobI, consists of a PIN domain and a Zn-ribbon module                                              | 15922464  | 153  | Crenarchaeota | Sulfolobus tokodaii str. 7         |
| Acd1_0234   | C1 | arCOG01529 | I | AcS   | Acyl-coenzyme A synthetase/AMP-(fatty) acid ligase                                                              | 15922466  | 681  | Crenarchaeota | Sulfolobus tokodaii str. 7         |
| Acd1_0235   | C1 | arCOG00065 | O | csdA  | Selenocysteine lyase/Cysteine sulfuryase                                                                        | 15922467  | 322  | Crenarchaeota | Sulfolobus tokodaii str. 7         |
| Acd1_0236   | C1 | arCOG05884 | S | -     | Uncharacterized conserved protein                                                                               | 227829051 | 622  | Crenarchaeota | Sulfolobus islandicus L.S.2.15     |
| Acd1_0237   | C1 | arCOG04272 | H | CobT  | NaMn:DMB phosphoribosyltransferase                                                                              | 15922470  | 40.8 | Crenarchaeota | Sulfolobus tokodaii str. 7         |
| Acd1_0238   | C1 | arCOG04479 | K | -     | Predicted transcriptional regulator containing an HTH domain fused to a Zn-ribbon                               | 15898941  | 243  | Crenarchaeota | Sulfolobus solfataricus P2         |
| Acd1_0239   | C1 | arCOG02291 | R | -     | HAD superfamily hydrolase                                                                                       | 15922472  | 464  | Crenarchaeota | Sulfolobus tokodaii str. 7         |
| Acd1_0240   | C1 | arCOG00910 | J | -     | Predicted RNA methylase                                                                                         | 384435202 | 89   | Crenarchaeota | Sulfolobus solfataricus 98/2       |
| Acd1_0241   | C1 | arCOG01213 | J | Cof   | HAD superfamily hydrolase                                                                                       | 284999293 | 127  | Crenarchaeota | Sulfolobus islandicus L.D.8.5      |
| Acd1_0242   | C1 | arCOG01894 | L | NfD   | Endonuclease IV                                                                                                 | 342306655 | 162  | Crenarchaeota | Sulfolobus tokodaii str. 7         |
| Acd1_0243   | C1 | arCOG00340 | C | GlcO  | FAD/FMN-containing dehydrogenase fused to Heterodisulfide reductase, subunit B                                  | 229583549 | 37.7 | Crenarchaeota | Sulfolobus islandicus Y.N.15.1     |
| Acd1_0244   | C1 | arCOG00419 | F | Hit   | HIT family hydrolase                                                                                            | 158428568 | 392  | Crenarchaeota | Sulfolobus tokodaii str. 7         |
| Acd1_0245   | C1 | arCOG03119 | S | -     | DedA family membrane protein                                                                                    | 15922478  | 168  | Crenarchaeota | Sulfolobus tokodaii str. 7         |
| Acd1_0246   | C1 | arCOG01073 | L | MutT  | NUDX family hydrolase                                                                                           | 15922479  | 294  | Crenarchaeota | Sulfolobus tokodaii str. 7         |
| Acd1_0247   | C1 | arCOG00820 | S | -     | Uncharacterized conserved protein                                                                               | 374632136 | 140  | Crenarchaeota | Metallosphaera yellowstonensis MK1 |
| Acd1_0248   | C1 | arCOG01034 | F | -     | Predicted nucleotide kinase                                                                                     | 332795951 | 47   | Crenarchaeota | Acidianus hospitalis W1            |
| Acd1_0249   | C1 | arCOG00069 | H | NadE  | NH3-dependent NAD+ synthetase                                                                                   | 327310179 | 439  | Crenarchaeota | Thermoproteus uzoniensis 768-20    |
| Acd1_0250   | C1 | arCOG00731 | K | ArsR  | Transcriptional regulator containing HTH domain, ArsR family                                                    | 70605859  | 778  | Crenarchaeota | Sulfolobus acidocaldarius DSM 639  |
| Acd1_0251   | C1 | arCOG05883 | S | -     | Uncharacterized conserved protein                                                                               | 15922487  | 103  | Crenarchaeota | Sulfolobus tokodaii str. 7         |
| Acd1_0252   | C1 | arCOG05489 | S | -     | Uncharacterized conserved protein                                                                               | 374631858 | 300  | Crenarchaeota | Metallosphaera yellowstonensis MK1 |
| Acd1_0253   | C1 | -          | - | -     | Uncharacterized protein                                                                                         | -         | -    | -             | -                                  |
| Acd1_0254   | C1 | arCOG01572 | S | -     | Uncharacterized conserved membrane protein                                                                      | 15922490  | 127  | Crenarchaeota | Sulfolobus tokodaii str. 7         |
| Acd1_0255   | C1 | arCOG07173 | S | -     | Uncharacterized conserved protein                                                                               | 227826414 | 266  | Crenarchaeota | Sulfolobus islandicus M.14.25      |
| Acd1_0256   | C1 | arCOG00467 | L | CDC6  | Cdc6-related protein, AAA superfamily ATPase                                                                    | 15922492  | 75.1 | Crenarchaeota | Sulfolobus tokodaii str. 7         |
| Acd1_0257   | C1 | arCOG01164 | C | Icd   | Iso-citrate dehydrogenase                                                                                       | 229580721 | 360  | Crenarchaeota | Sulfolobus islandicus Y.G.57.14    |
| Acd1_0258   | C1 | arCOG07274 | S | -     | Uncharacterized conserved protein                                                                               | 284175462 | 397  | Crenarchaeota | Sulfolobus solfataricus 98/2       |
| Acd1_0259   | C1 | arCOG00604 | R | -     | Uncharacterized conserved protein                                                                               | 227811754 | 196  | Crenarchaeota | Sulfolobus islandicus L.S.2.15     |
| Acd1_0260   | C1 | arCOG00494 | E | Asd   | Aspartate-semialdehyde dehydrogenase                                                                            | 332798017 | 673  | Crenarchaeota | Acidianus hospitalis W1            |
| Acd1_0261   | C1 | arCOG00445 | E | IldV  | Dihydroxyacid dehydratase/phosphogluconate dehydratase                                                          | 15922499  | 135  | Crenarchaeota | Sulfolobus tokodaii str. 7         |
| Acd1_0262   | C1 | arCOG01791 | Q | -     | SAM-dependent methyltransferase                                                                                 | 15898957  | 397  | Crenarchaeota | Sulfolobus solfataricus P2         |
| Acd1_0263   | C1 | arCOG08538 | S | -     | Uncharacterized conserved protein                                                                               | 332798013 | 77.8 | Crenarchaeota | Acidianus hospitalis W1            |
| Acd1_0264   | C1 | arCOG01034 | F | -     | Alanine dehydrogenase, mu-crystallin homolog                                                                    | 15922506  | 192  | Crenarchaeota | Sulfolobus tokodaii str. 7         |
| Acd1_0265   | C1 | arCOG00489 | H | -     | cof(I)lamin adenosyltransferase                                                                                 | 15922507  | 117  | Crenarchaeota | Sulfolobus tokodaii str. 7         |
| Acd1_0266   | C1 | arCOG00271 | G | RhaT  | Permease of the drug/metabolite transporter (DMT) superfamily                                                   | 342306661 | 230  | Crenarchaeota | Sulfolobus tokodaii str. 7         |
| Acd1_0267   | C1 | arCOG04060 | K | -     | Predicted transcriptional regulator                                                                             | 15922518  | 204  | Crenarchaeota | Sulfolobus tokodaii str. 7         |
| Acd1_0268   | C1 | arCOG00461 | K | EGD2  | Transcription factor homologous to NACalpha-BTF3                                                                | 70608063  | 650  | Crenarchaeota | Sulfolobus acidocaldarius DSM 639  |
| Acd1_0269   | C1 | arCOG00541 | J | YSH1  | Predicted exonuclease of the beta-lactamase fold involved in RNA processing                                     | 15922516  | 154  | Crenarchaeota | Sulfolobus tokodaii str. 7         |
| Acd1_0270   | C1 | arCOG00401 | J | ThrS  | Theoryl-tRNA synthetase                                                                                         | 70608065  | 124  | Crenarchaeota | Sulfolobus acidocaldarius DSM 639  |
| Acd1_0271   | C1 | arCOG01028 | I | ERG12 | Mevalonate kinase                                                                                               | 15922513  | 50.1 | Crenarchaeota | Sulfolobus tokodaii str. 7         |
| Acd1_0272   | C1 | arCOG00057 | M | GlmS  | Glucosamine 6-phosphate synthetase                                                                              | 342306662 | 485  | Crenarchaeota | Sulfolobus tokodaii str. 7         |
| Acd1_0273   | C1 | -          | - | -     | Uncharacterized protein                                                                                         | 229580093 | 81.3 | Crenarchaeota | Sulfolobus islandicus Y.G.57.14    |
| Acd1_0274   | C1 | arCOG00666 | M | GCD1  | N-acetylglucosamine-1-phosphate uridylyltransferase                                                             | 227827988 | 192  | Crenarchaeota | Sulfolobus islandicus M.14.25      |
| Acd1_0275   | C1 | -          | - | -     | Uncharacterized protein                                                                                         | 13542043  | 49.7 | Euryarchaeota | Thermoplasma volcanium GS51        |
| trNAGlyGCC  | C1 | arCOG02474 | C | HyaA  | Ni,Fe-hydrogenase I small subunit                                                                               | 374631473 | 306  | Crenarchaeota | Metallosphaera yellowstonensis MK1 |
| Acd1_0276   | C1 | arCOG01550 | C | HyaB  | Ni,Fe-hydrogenase I large subunit                                                                               | 374631472 | 790  | Crenarchaeota | Metallosphaera yellowstonensis MK1 |
| Acd1_0277   | C1 | arCOG03569 | R | NrfB  | Ribonucleoside reductase, beta subunit                                                                          | 15922520  | 109  | Crenarchaeota | Sulfolobus tokodaii str. 7         |
| Acd1_0279   | C1 | arCOG01308 | O | Cdc48 | ATPase of the AAA+ class, CDC48 family                                                                          | 15922015  | 103  | Crenarchaeota | Sulfolobus tokodaii str. 7         |
| Acd1_0280   | C1 | arCOG06032 | S | -     | Uncharacterized conserved protein                                                                               | 15922007  | 295  | Crenarchaeota | Sulfolobus tokodaii str. 7         |
| Acd1_0281   | C1 | arCOG00235 | Q | MhpD  | 2-keto-4-pentenoate hydratase/2-oxohepta-3-ene-1,7-dioic acid hydratase (catechol pathway)                      | 15922009  | 271  | Crenarchaeota | Sulfolobus tokodaii str. 7         |
| Acd1_0282   | C1 | arCOG05946 | S | -     | Uncharacterized conserved protein                                                                               | 33279621  | 55.8 | Crenarchaeota | Acidianus hospitalis W1            |
| Acd1_0283   | C1 | arCOG03696 | C | Naph  | Polyferredoxin                                                                                                  | 15922005  | 120  | Crenarchaeota | Sulfolobus tokodaii str. 7         |
| Acd1_0284   | C1 | -          | - | -     | Uncharacterized protein                                                                                         | -         | -    | -             | -                                  |
| Acd1_0285   | C1 | arCOG01055 | K | -     | Predicted transcriptional regulator                                                                             | 15920879  | 163  | Crenarchaeota | Sulfolobus tokodaii str. 7         |
| Acd1_0286   | C1 | arCOG02312 | V | SalY  | ABC-type antimicrobial peptide transport system, permease component                                             | 146304292 | 99.8 | Crenarchaeota | Metallosphaera sedula DSM 5348     |
| Acd1_0287   | C1 | arCOG02079 | M | -     | S-layer domain                                                                                                  | 330834570 | 141  | Crenarchaeota | Metallosphaera cuprina Ar-4        |
| Acd1_0288   | C1 | arCOG00932 | V | SalK  | ABC-type antimicrobial peptide transport system, ATPase component                                               | 374632608 | 108  | Crenarchaeota | Metallosphaera yellowstonensis MK1 |
| Acd1_0289   | C1 | arCOG01144 | G | PrpP  | Permease of the major facilitator superfamily                                                                   | 227827350 | 238  | Crenarchaeota | Sulfolobus islandicus M.14.25      |
| Acd1_0290   | C1 | arCOG01145 | R | -     | Calcineurin-like phosphoesterase                                                                                | 374632183 | 129  | Crenarchaeota | Metallosphaera yellowstonensis MK1 |
| Acd1_0291   | C1 | arCOG05706 | E | DAP2  | Dipeptidyl aminopeptidase/acylaminoacyl-peptidase                                                               | 15898972  | 223  | Crenarchaeota | Sulfolobus solfataricus P2         |
| Acd1_0292   | C1 | arCOG04331 | R | -     | Predicted thioesterase                                                                                          | 15920895  | 615  | Crenarchaeota | Sulfolobus tokodaii str. 7         |
| Acd1_0293   | C1 | arCOG02741 | H | ThiC  | Thiamine biosynthesis protein ThiC                                                                              | 332796889 | 67.8 | Crenarchaeota | Acidianus hospitalis W1            |
| Acd1_0294   | C1 | arCOG00619 | E | GIB   | Glutamate synthase domain 2 and ferredoxin domain                                                               | 342306666 | 605  | Crenarchaeota | Sulfolobus tokodaii str. 7         |
| Acd1_0295   | C1 | arCOG00095 | E | GIB   | Glutamate synthase domain 1                                                                                     | 15922527  | 32.3 | Crenarchaeota | Sulfolobus tokodaii str. 7         |
| Acd1_0296   | C1 | arCOG00652 | H | CbIG  | Cobalamin biosynthesis protein CbIG                                                                             | 70608030  | 357  | Crenarchaeota | Sulfolobus acidocaldarius DSM 639  |
| Acd1_0297   | C1 | arCOG04233 | P | FepB  | ABC-type Fe <sup>3+</sup> -hydroxamate transport system, periplasmic component                                  | 385776578 | 127  | Crenarchaeota | Sulfolobus islandicus REY15A       |
| Acd1_0298   | C1 | arCOG02771 | S | -     | Uncharacterized conserved protein                                                                               | 15922340  | 41.6 | Crenarchaeota | Sulfolobus tokodaii str. 7         |
| Acd1_0299   | C1 | arCOG02092 | E | LeuE  | Iso-pyruvate/homocitrate/citramalate synthase                                                                   | 15922531  | 193  | Crenarchaeota | Sulfolobus tokodaii str. 7         |
| Acd1_0300   | C1 | arCOG00477 | H | UbiA  | 4-hydroxybenzoate poly(prenyl)transferase or related prenyltransferase                                          | 15922532  | 251  | Crenarchaeota | Sulfolobus tokodaii str. 7         |
| Acd1_0301   | C1 | arCOG03271 | S | -     | Uncharacterized conserved protein, AIG2 family                                                                  | 15922533  | 83.2 | Crenarchaeota | Sulfolobus tokodaii str. 7         |
| Acd1_0302   | C1 | arCOG05511 | R | -     | OB-fold containing protein                                                                                      | 119873076 | 80.9 | Crenarchaeota | Pyrobaculum islandicum DSM 4184    |
| Acd1_0303   | C1 | arCOG00021 | H | -     | Predicted transcriptional regulator fused phosphomethylpyrimidine kinase, involved in the thiamine biosynthesis | 332797375 | 304  | Crenarchaeota | Acidianus hospitalis W1            |
| Acd1_0304   | C1 | arCOG00002 | K | -     | Predicted transcriptional regulator, PadR family                                                                | 15922538  | 252  | Crenarchaeota | Sulfolobus tokodaii str. 7         |
| Acd1_0305   | C1 | arCOG02994 | S | -     | Cupin domain containing protein                                                                                 | 15898388  | 255  | Crenarchaeota | Sulfolobus solfataricus P2         |
| Acd1_0307   | C1 | -          | - | -     | Uncharacterized protein                                                                                         | -         | -    | -             | -                                  |
| Acd1_0306   | C1 | arCOG03216 | S | -     | Uncharacterized conserved protein                                                                               | 15922540  | 599  | Crenarchaeota | Sulfolobus tokodaii str. 7         |
| Acd1_0308   | C1 | arCOG06038 | S | -     | Uncharacterized conserved protein, contains thioredoxin domain                                                  | 15922541  | 256  | Crenarchaeota | Sulfolobus tokodaii str. 7         |
| Acd1_0309   | C1 | arCOG00317 | F | -     | Uncharacterized conserved protein                                                                               | 70608053  | 105  | Crenarchaeota | Sulfolobus acidocaldarius DSM 639  |
| Acd1_0310   | C1 | arCOG01883 | F | ThyH1 | Thymidylate synthase                                                                                            | 332796879 | 396  | Crenarchaeota | Acidianus hospitalis W1            |
| Acd1_0311   | C1 | arCOG01557 | C | NuoA  | NADH dehydrogenase subunit A                                                                                    | 70608051  | 956  | Crenarchaeota | Sulfolobus acidocaldarius DSM 639  |
| Acd1_0312   | C1 | arCOG01552 | C | NuoC  | NADH dehydrogenase subunit C                                                                                    | 15922545  | 30.8 | Crenarchaeota | Sulfolobus tokodaii str. 7         |
| Acd1_0313   | C1 | arCOG01548 | C | NuoD  | NADH dehydrogenase subunit D                                                                                    | 15922546  | 338  | Crenarchaeota | Sulfolobus tokodaii str. 7         |
| Acd1_0314   | C1 | arCOG0     |   |       |                                                                                                                 |           |      |               |                                    |



|           |    |            |   |          |                                                                                                                |           |      |               |                                   |
|-----------|----|------------|---|----------|----------------------------------------------------------------------------------------------------------------|-----------|------|---------------|-----------------------------------|
| Acd1_0330 | C1 | arCOG00021 | H | -        | Predicted transcriptional regulator fused phosphomethylpyrimidine kinase, involved in the thiamin biosynthesis | 15920358  | 387  | Crenarchaeota | Sulfolobus tokodaii str. 7        |
| Acd1_0331 | C1 | arCOG08476 | S | -        | Uncharacterized conserved protein                                                                              | 227827906 | 135  | Crenarchaeota | Sulfolobus islandicus M.14.25     |
| Acd1_0332 | C1 | arCOG05938 | S | -        | Uncharacterized conserved protein                                                                              | 15920357  | 91.7 | Crenarchaeota | Sulfolobus tokodaii str. 7        |
| Acd1_0333 | C1 | arCOG06514 | R | SpoIVFB  | Zn-dependent protease                                                                                          | 352682179 | 43.1 | Crenarchaeota | Thermoproteus tenax Kra 1         |
| Acd1_0334 | C1 | arCOG01768 | E | GlpG     | Membrane associated serine protease                                                                            | 284173265 | 866  | Crenarchaeota | Sulfolobus solfataricus 98/2      |
| Acd1_0335 | C1 | arCOG08342 | F | -        | Uncharacterized conserved protein                                                                              | 374633816 | 633  | Crenarchaeota | Metallophera yellowstonensis MK1  |
| Acd1_0336 | C1 | arCOG01038 | F | -        | Predicted nucleotide kinase (CMP/AMP kinase related)                                                           | 146304919 | 941  | Crenarchaeota | Metallophera sedula DSM 5348      |
| Acd1_0337 | C1 | arCOG05582 | D | Mrp      | Mrp family protein, ATPase, contains iron-sulfur cluster                                                       | 146304920 | 159  | Crenarchaeota | Metallophera sedula DSM 5348      |
| Acd1_0338 | C1 | arCOG08343 | S | -        | Uncharacterized conserved protein                                                                              | 374633813 | 149  | Crenarchaeota | Metallophera yellowstonensis MK1  |
| Acd1_0339 | C1 | arCOG02242 | K | -        | Transcriptional regulator, contains HTH domain                                                                 | 15920352  | 872  | Crenarchaeota | Sulfolobus tokodaii str. 7        |
| Acd1_0340 | C1 | arCOG04074 | H | -        | 5-formyltetrahydrofolate cyclo-ligase                                                                          | 15920351  | 410  | Crenarchaeota | Sulfolobus tokodaii str. 7        |
| Acd1_0341 | C1 | arCOG01947 | E | RhbB     | Putative threonine efflux protein                                                                              | 15920350  | 304  | Crenarchaeota | Sulfolobus tokodaii str. 7        |
| Acd1_0342 | C1 | arCOG02931 | S | -        | Uncharacterized conserved protein                                                                              | 332797513 | 99   | Crenarchaeota | Acidianus hospitalis W1           |
| Acd1_0343 | C1 | arCOG01887 | J | TrpS     | Tryptophanyl-tRNA synthetase                                                                                   | 161751105 | 729  | Crenarchaeota | Sulfolobus tokodaii str. 7        |
| Acd1_0344 | C1 | arCOG0452  | D | ESCRTIII | Crenarchaeal division protein ESCRT-III                                                                        | 70606286  | 209  | Crenarchaeota | Sulfolobus acidocaldarius DSM 639 |
| Acd1_0346 | C1 | arCOG02228 | S | -        | Predicted membrane protein                                                                                     | 15897380  | 187  | Crenarchaeota | Sulfolobus solfataricus P2        |
| Acd1_0347 | C1 | arCOG04273 | E | HicC     | Histidinol-phosphate/aromatic aminotransferase or coberic acid decarboxylase                                   | 70606288  | 201  | Crenarchaeota | Sulfolobus acidocaldarius DSM 639 |
| Acd1_0348 | C1 | arCOG02271 | K | -        | Predicted transcriptional regulator, C-terminal HTH-like domain                                                | 15920343  | 419  | Crenarchaeota | Sulfolobus tokodaii str. 7        |
| Acd1_0349 | C1 | arCOG04548 | C | -        | Ferredoxin                                                                                                     | 15899306  | 300  | Crenarchaeota | Sulfolobus solfataricus P2        |
| Acd1_0350 | C1 | arCOG01603 | C | PorG     | Pyruvate:ferredoxin oxidoreductase or related 2-oxoacid:ferredoxin oxidoreductase, gamma subunit               | 15921824  | 47   | Crenarchaeota | Sulfolobus tokodaii str. 7        |
| Acd1_0351 | C1 | arCOG01605 | C | -        | Pyruvate:ferredoxin oxidoreductase or related 2-oxoacid:ferredoxin oxidoreductase, delta subunit               | 15898060  | 162  | Crenarchaeota | Sulfolobus solfataricus P2        |
| Acd1_0352 | C1 | arCOG01608 | C | PorA     | Pyruvate:ferredoxin oxidoreductase or related 2-oxoacid:ferredoxin oxidoreductase, alpha subunit               | 15921825  | 486  | Crenarchaeota | Sulfolobus tokodaii str. 7        |
| Acd1_0353 | C1 | arCOG01601 | C | PorB     | Pyruvate:ferredoxin oxidoreductase or related 2-oxoacid:ferredoxin oxidoreductase, beta subunit                | 15921826  | 107  | Crenarchaeota | Sulfolobus tokodaii str. 7        |
| Acd1_0354 | C1 | arCOG03871 | S | -        | Uncharacterized protein                                                                                        | 305733685 | 414  | Crenarchaeota | Acidianus ambivalens              |
| Acd1_0355 | C1 | arCOG07198 | S | 0        | Uncharacterized conserved membrane protein                                                                     | 332795818 | 499  | Crenarchaeota | Acidianus hospitalis W1           |
| Acd1_0356 | C1 | arCOG02089 | M | -        | S-layer domain                                                                                                 | 70606953  | 206  | Crenarchaeota | Sulfolobus acidocaldarius DSM 639 |
| Acd1_0357 | C1 | arCOG02207 | L | XthA     | Exonuclease III                                                                                                | 332797485 | 87   | Crenarchaeota | Acidianus hospitalis W1           |
| Acd1_0358 | C1 | arCOG01995 | R | -        | Oligo(ketide cyclase/lipid transport protein family                                                            | 15899686  | 110  | Crenarchaeota | Sulfolobus solfataricus P2        |
| Acd1_0359 | C1 | arCOG01951 | R | 0        | Predicted P-loop ATPase fused to an acetyltransferase                                                          | 305733685 | 414  | Crenarchaeota | Sulfolobus islandicus HSE10/4     |
| Acd1_0360 | C1 | arCOG02175 | R | -        | Predicted transporter of the RND superfamily                                                                   | 15922229  | 337  | Crenarchaeota | Sulfolobus tokodaii str. 7        |
| Acd1_0361 | C1 | arCOG04762 | M | WcaG     | Nucleoside-diphosphate-sugar epimerase                                                                         | 15922684  | 111  | Crenarchaeota | Sulfolobus tokodaii str. 7        |
| Acd1_0362 | C1 | arCOG03699 | S | -        | Uncharacterized conserved protein                                                                              | 146303032 | 285  | Crenarchaeota | Metallophera sedula DSM 5348      |
| Acd1_0363 | C1 | arCOG02691 | G | Prop     | Permease of the major facilitator superfamily                                                                  | 15922140  | 37.7 | Crenarchaeota | Sulfolobus tokodaii str. 7        |
| Acd1_0364 | C1 | arCOG07679 | R | ThuI     | Putative intracellular protease/amidase                                                                        | 70607987  | 34.3 | Crenarchaeota | Sulfolobus acidocaldarius DSM 639 |
| Acd1_0365 | C1 | arCOG01564 | J | SelB     | Selenocysteine-specific translation elongation factor or SelB-II domain                                        | 15922799  | 422  | Crenarchaeota | Sulfolobus tokodaii str. 7        |
| IRNAGYTC  |    |            |   |          | IRNAGYTC                                                                                                       |           |      |               |                                   |
| Acd1_0366 | C1 | arCOG03664 | G | -        | Glycosyltransferase                                                                                            | 240102646 | 373  | Euryarchaeota | Thermococcus gammatolerans E13    |
| Acd1_0367 | C1 | arCOG01411 | M | RfaG     | Glycosyltransferase                                                                                            | 15920364  | 55.5 | Crenarchaeota | Sulfolobus tokodaii str. 7        |
| Acd1_0368 | C1 | arCOG01615 | S | -        | Predicted membrane protein                                                                                     | 70606705  | 1273 | Crenarchaeota | Sulfolobus acidocaldarius DSM 639 |
| Acd1_0369 | C1 | arCOG03871 | S | -        | Flagellin protein G                                                                                            | 229580579 | 45.4 | Crenarchaeota | Sulfolobus islandicus Y.G.57.14   |
| Acd1_0370 | C1 | arCOG01590 | I | AcrC     | Biotin carboxylase                                                                                             | 15920812  | 376  | Crenarchaeota | Acidianus brierleyi               |
| Acd1_0371 | C1 | arCOG02699 | I | AcrB     | Biotin carboxyl carrier protein                                                                                | 27877098  | 56.2 | Crenarchaeota | Acidianus brierleyi               |
| Acd1_0372 | C1 | arCOG02705 | I | -        | Acetyl-CoA carboxylase, carboxyltransferase component                                                          | 15920810  | 99.8 | Crenarchaeota | Sulfolobus tokodaii str. 7        |
| Acd1_0373 | C1 | arCOG00929 | L | NfiI     | Deoxyinosine 3' endonuclease (endonuclease V)                                                                  | 332797774 | 96.3 | Crenarchaeota | Acidianus hospitalis W1           |
| Acd1_0374 | C1 | arCOG03413 | T | COCD14   | Protein-tyrosine phosphatase                                                                                   | 15920797  | 1481 | Crenarchaeota | Sulfolobus tokodaii str. 7        |
| Acd1_0375 | C1 | arCOG00790 | V | Cs4      | CRISPR-associated protein Cas4, RecA family exonuclease                                                        | 385772775 | 417  | Crenarchaeota | Sulfolobus islandicus HSE10/4     |
| Acd1_0376 | C1 | arCOG01369 | M | WcaG     | Nucleoside-diphosphate-sugar epimerase                                                                         | 15920365  | 155  | Crenarchaeota | Sulfolobus tokodaii str. 7        |
| IRNLeuGAG |    |            |   |          | IRNLeuGAG                                                                                                      |           |      |               |                                   |
| Acd1_0377 | C1 | arCOG02694 | U | TatA     | Sec-independent protein secretion pathway component                                                            | 332797334 | 125  | Crenarchaeota | Acidianus hospitalis W1           |
| Acd1_0378 | C1 | arCOG05911 | U | TatA     | Sec-independent protein secretion pathway component                                                            | 374631942 | 182  | Crenarchaeota | Metallophera yellowstonensis MK1  |
| Acd1_0379 | C1 | arCOG01919 | U | TatC     | Sec-independent protein secretion pathway component TatC                                                       | 159204170 | 236  | Crenarchaeota | Acidianus ambivalens              |
| Acd1_0380 | C1 | arCOG01171 | T | RAD55    | RecA-superfamily ATPase implicated in signal transduction                                                      | 284176049 | 424  | Crenarchaeota | Sulfolobus solfataricus 98/2      |
| Acd1_0381 | C1 | arCOG04349 | S | -        | Predicted membrane protein                                                                                     | 15921832  | 211  | Crenarchaeota | Sulfolobus tokodaii str. 7        |
| Acd1_0382 | C1 | arCOG01943 | C | PhtA     | Glycolate dehydrogenase (EC 1.1.99.14), iron-sulfur subunit G1c (fragment)                                     | 227828462 | 315  | Crenarchaeota | Sulfolobus islandicus M.14.25     |
| Acd1_0383 | C1 | arCOG05911 | U | TatA     | Sec-independent protein secretion pathway component                                                            | 332797775 | 384  | Crenarchaeota | Acidianus hospitalis W1           |
| Acd1_0384 | C1 | arCOG00423 | R | -        | Predicted phosphotriase (DHF superfamily)                                                                      | 15920800  | 88.2 | Crenarchaeota | Sulfolobus tokodaii str. 7        |
| Acd1_0385 | C1 | arCOG00796 | O | Pcm      | Protein-L-isoaspartate carboxylmethyltransferase                                                               | 15899326  | 321  | Crenarchaeota | Sulfolobus solfataricus P2        |
| Acd1_0386 | C1 | arCOG00174 | P | -        | ABC-type anion transport system, duplicated permease component                                                 | 15920813  | 590  | Crenarchaeota | Sulfolobus tokodaii str. 7        |
| Acd1_0387 | C1 | arCOG00193 | P | TauB     | ABC-type nitrate/sulfonate/bicarbonate transport system, ATPase component                                      | 332797790 | 115  | Crenarchaeota | Acidianus hospitalis W1           |
| Acd1_0388 | C1 | arCOG00424 | E | -        | Zn-dependent carboxypeptidase                                                                                  | 15921953  | 591  | Crenarchaeota | Sulfolobus tokodaii str. 7        |
| Acd1_0389 | C1 | arCOG08322 | S | -        | Zn finger protein                                                                                              | 332797745 | 233  | Crenarchaeota | Acidianus hospitalis W1           |
| Acd1_0390 | C1 | arCOG01189 | R | AarF     | Predicted unusual protein kinase                                                                               | 15921955  | 43.5 | Crenarchaeota | Sulfolobus tokodaii str. 7        |
| Acd1_0391 | C1 | arCOG01830 | O | IbpA     | Molecular chaperone (HSP20 family)                                                                             | 15899330  | 150  | Crenarchaeota | Sulfolobus solfataricus P2        |
| Acd1_0392 | C1 | arCOG03332 | C | GlpC     | Membrane associated Fe-S oxidoreductase                                                                        | 15921957  | 300  | Crenarchaeota | Sulfolobus tokodaii str. 7        |
| Acd1_0393 | C1 | arCOG03335 | C | -        | Uncharacterized conserved protein containing ferredoxin-like domain                                            | 15921958  | 356  | Crenarchaeota | Sulfolobus tokodaii str. 7        |
| Acd1_0394 | C1 | arCOG01242 | L | XarC     | Integrase                                                                                                      | 15921979  | 67   | Crenarchaeota | Sulfolobus tokodaii str. 7        |
| Acd1_0395 | C1 | arCOG03182 | K | MdrC     | Transcriptional regulator, MarR family                                                                         | 342360706 | 352  | Crenarchaeota | Sulfolobus tokodaii str. 7        |
| Acd1_0396 | C1 | arCOG04048 | F | DacD     | Deoxycytidine deaminase                                                                                        | 70607405  | 885  | Crenarchaeota | Sulfolobus acidocaldarius DSM 639 |
| Acd1_0397 | C1 | arCOG00795 | J | Sun      | tRNA or rRNA cytosine-C5-methylase                                                                             | 70606823  | 369  | Crenarchaeota | Sulfolobus acidocaldarius DSM 639 |
| Acd1_0398 | C1 | arCOG07136 | J | -        | HTH containing transcriptional regulator                                                                       | 227830932 | 263  | Crenarchaeota | Sulfolobus islandicus L.S.2.15    |
| Acd1_0399 | C1 | arCOG02738 | R | -        | NiR family protein                                                                                             | 374632238 | 87   | Crenarchaeota | Metallophera yellowstonensis MK1  |
| Acd1_0400 | C1 | arCOG06207 | O | -        | Rdx family selenoprotein                                                                                       | 374632239 | 424  | Crenarchaeota | Metallophera yellowstonensis MK1  |
| Acd1_0401 | C1 | arCOG01920 | T | SixA     | Phosphohistidine phosphatase SixA                                                                              | 227826767 | 174  | Crenarchaeota | Sulfolobus islandicus M.14.25     |
| Acd1_0402 | C1 | arCOG05053 | R | -        | Metal-dependent hydrolase of the beta-lactamase superfamily II                                                 | 15920876  | 186  | Crenarchaeota | Sulfolobus tokodaii str. 7        |
| Acd1_0403 | C1 | arCOG05546 | S | -        | Uncharacterized conserved protein                                                                              | 146303760 | 40.4 | Crenarchaeota | Metallophera sedula DSM 5348      |
| Acd1_0404 | C1 | arCOG04321 | S | -        | Uncharacterized conserved protein with similarity to Ribonucleotide reductase and Pyruvate formate lyase       | 15920428  | 176  | Crenarchaeota | Sulfolobus tokodaii str. 7        |
| Acd1_0405 | C1 | arCOG04941 | T | -        | ACT domain-containing protein                                                                                  | 342306119 | 971  | Crenarchaeota | Sulfolobus tokodaii str. 7        |
| Acd1_0406 | C1 | arCOG02730 | V | -        | PIN domain containing protein                                                                                  | 374631820 | 140  | Crenarchaeota | Metallophera yellowstonensis MK1  |
| Acd1_0407 | C1 | arCOG00815 | K | AbrB     | Transcriptional regulator AbrB                                                                                 | 374631821 | 147  | Crenarchaeota | Metallophera yellowstonensis MK1  |
| Acd1_0408 | C1 | arCOG03854 | S | -        | Uncharacterized conserved protein                                                                              | 229581219 | 272  | Crenarchaeota | Sulfolobus islandicus Y.N.15.51   |
| Acd1_0409 | C1 | arCOG06006 | S | -        | Cell surface protein                                                                                           | 227831234 | 251  | Crenarchaeota | Sulfolobus islandicus L.S.2.15    |
| Acd1_0410 | C1 | arCOG06002 | S | -        | Cell surface protein                                                                                           | 15899842  | 360  | Crenarchaeota | Sulfolobus solfataricus P2        |
| Acd1_0411 | C1 | arCOG06003 | S | -        | Uncharacterized conserved protein                                                                              | 374633022 | 102  | Crenarchaeota | Metallophera yellowstonensis MK1  |
| Acd1_0412 | C1 | arCOG00168 | P | PstA     | ABC-type phosphate transport system, permease component                                                        | 229581826 | 114  | Crenarchaeota | Sulfolobus islandicus Y.N.15.51   |
| Acd1_0413 | C1 | arCOG00167 | P | PstC     | ABC-type phosphate transport system, permease component                                                        | 238620108 | 284  | Crenarchaeota | Sulfolobus islandicus M.16.4      |
| Acd1_0414 | C1 | arCOG00213 | P | PstB     | ABC-type phosphate transport system, periplasmic component                                                     | 238630605 | 285  | Crenarchaeota | Sulfolobus islandicus L.S.2.15    |
| Acd1_0415 | C1 | arCOG00231 | P | PstB     | ABC-type phosphate transport system, ATPase component                                                          | 158974114 | 392  | Crenarchaeota | Sulfolobus solfataricus P2        |
| Acd1_0416 | C1 | arCOG06008 | R | -        | Predicted metal permease                                                                                       | 15899807  | 202  | Crenarchaeota | Sulfolobus solfataricus P2        |
| Acd1_0417 | C1 | arCOG04233 | P | FepB     | ABC-type Fe3+-hydroxamate transport system, periplasmic component                                              | 227827887 | 92   | Crenarchaeota | Sulfolobus islandicus M.14.25     |
| Acd1_0418 | C1 | arCOG01007 | P | FepD     | ABC-type Fe3+-siderophore transport system, permease component                                                 | 284173801 | 41.6 | Crenarchaeota | Sulfolobus solfataricus 98/2      |
| Acd1_0419 | C1 | arCOG00198 | P | FepC     | ABC-type cobalamin/Fe3+-siderophores transport system, ATPase component                                        | 284173800 | 429  | Crenarchaeota | Sulfolobus solfataricus 98/2      |
| Acd1_0420 | C1 | arCOG03169 | R | -        | Predicted ATPase (AAA+ superfamily)                                                                            | 238619467 | 260  | Crenarchaeota | Sulfolobus islandicus M.16.4      |
| Acd1_0421 | C1 | arCOG01002 | S | -        | Uncharacterized conserved protein                                                                              | 374634140 | 104  | Crenarchaeota | Metallophera yellowstonensis MK1  |
| Acd1_0422 | C1 | arCOG01002 | S | -        | Uncharacterized conserved protein                                                                              | 374634141 | 163  | Crenarchaeota | Metallophera yellowstonensis MK1  |
| Acd1_0423 | C1 | arCOG07847 | S | -        | Uncharacterized conserved protein                                                                              | 229584960 | 232  | Crenarchaeota | Sulfolobus islandicus M.16.27     |
| Acd1_0424 | C1 | arCOG09993 | S | -        | Uncharacterized conserved protein                                                                              | 284175525 | 662  | Crenarchaeota | Sulfolobus solfataricus 98/2      |
| Acd1_0425 | C1 | arCOG09993 | S | -        | Uncharacterized conserved protein                                                                              | 374633367 | 87.8 | Crenarchaeota | Metallophera yellowstonensis MK1  |
| Acd1_0426 | C1 | arCOG03993 | K | -        | Predicted membrane-associated transcriptional regulator                                                        | 146303959 | 115  | Crenarchaeota | Metallophera sedula DSM 5348      |
| Acd1_0427 | C1 | arCOG03993 | K | -        | Predicted membrane-associated transcriptional regulator                                                        | 146303959 | 115  | Crenarchaeota | Metallophera sedula DSM 5348      |
| Acd1_0428 | C1 | arCOG07269 | S | -        | Uncharacterized conserved protein                                                                              | 284989774 | 115  | Crenarchaeota | Sulfolobus islandicus L.D.8.5     |
| Acd1_0429 | C1 | arCOG06029 | S | -        | Uncharacterized conserved protein                                                                              | 159212110 | 483  | Crenarchaeota | Sulfolobus tokodaii str. 7        |
| Acd1_0430 | C1 | arCOG01412 | M | RfaG     | Glycosyltransferase                                                                                            | 146304523 | 97.8 | Crenarchaeota | Metallophera sedula DSM 5348      |
| Acd1_0431 | C1 | arCOG03164 | L | -        | Predicted site-specific integrase-resolvase                                                                    | 229578345 | 0    | Crenarchaeota | Sulfolobus islandicus Y.G.57.14   |
| Acd1_0432 | C1 | arCOG0     |   |          |                                                                                                                |           |      |               |                                   |

|           |    |            |   |                                                 |           |      |               |                                      |
|-----------|----|------------|---|-------------------------------------------------|-----------|------|---------------|--------------------------------------|
| Accl_0455 | C1 | arCOG03852 | S | Uncharacterized conserved protein               | 15921924  | 187  | Crenarchaeota | Sulfolobus tokodaii str. 7           |
| Accl_0456 | C1 | arCOG00535 | H | ThiS                                            | 70607305  | 164  | Crenarchaeota | Sulfolobus acidocaldarius DSM 639    |
| Accl_0457 | C1 | arCOG01713 | S | Uncharacterized protein                         | 33083515  | 394  | Crenarchaeota | Metatollosphaera cuprina Ar-4        |
| Accl_0458 | C1 | -          | - | Uncharacterized conserved protein               | 327310657 | 105  | Crenarchaeota | Thermoproteus ueronensis 768-20      |
| Accl_0459 | C1 | arCOG00744 | K | Transcriptional regulator containing HTH domain | 15922155  | 442  | Crenarchaeota | Sulfolobus tokodaii str. 7           |
| Accl_0460 | C1 | arCOG02027 | P | NrdD                                            | 15922154  | 456  | Crenarchaeota | Sulfolobus tokodaii str. 7           |
| Accl_0461 | C1 | arCOG03428 | R | NrfG                                            | 15922153  | 608  | Crenarchaeota | Sulfolobus tokodaii str. 7           |
| Accl_0462 | C1 | arCOG01496 | C | BicC                                            | 15922152  | 499  | Crenarchaeota | Sulfolobus tokodaii str. 7           |
| Accl_0463 | C1 | arCOG01500 | C | Fe-S-cluster-containing dehydrogenase component | 15922151  | 458  | Crenarchaeota | Sulfolobus tokodaii str. 7           |
| Accl_0464 | C1 | arCOG01505 | R | TorD                                            | 15922150  | 486  | Crenarchaeota | Sulfolobus tokodaii str. 7           |
| Accl_0465 | C1 | arCOG02187 | C | NapF                                            | 342306590 | 165  | Crenarchaeota | Sulfolobus tokodaii str. 7           |
| Accl_0466 | C1 | arCOG06026 | R | HAD superfamily hydrolase                       | 15922148  | 154  | Crenarchaeota | Sulfolobus tokodaii str. 7           |
| Accl_0467 | C1 | arCOG01714 | S | Uncharacterized conserved protein               | 15922147  | 176  | Crenarchaeota | Sulfolobus tokodaii str. 7           |
| Accl_0468 | C1 | arCOG01340 | C | Acyl-CoA synthetase (NDP forming)               | 15921831  | 592  | Crenarchaeota | Sulfolobus tokodaii str. 7           |
| Accl_0469 | C1 | -          | - | Uncharacterized protein                         | 15922115  | 817  | Crenarchaeota | Sulfolobus tokodaii str. 7           |
| Accl_0470 | C1 | arCOG01096 | S | Ferritin-like domain containing protein         | 227828966 | 587  | Crenarchaeota | Sulfolobus islandicus M.14.25        |
| Accl_0471 | C1 | arCOG01529 | I | AcS                                             | 15921017  | 98.2 | Crenarchaeota | Sulfolobus tokodaii str. 7           |
| Accl_0472 | C1 | arCOG05971 | G | MFS family permease                             | 227827438 | 701  | Crenarchaeota | Sulfolobus islandicus M.14.25        |
| Accl_0473 | C1 | arCOG03696 | C | NapH                                            | 15922172  | 327  | Crenarchaeota | Sulfolobus tokodaii str. 7           |
| Accl_0474 | C1 | arCOG07339 | S | Uncharacterized conserved protein               | 385774561 | 352  | Crenarchaeota | Sulfolobus islandicus HW10/4         |
| Accl_0475 | C1 | arCOG00345 | C | GlcD                                            | 332796589 | 134  | Crenarchaeota | Acidianus hospitalis W1              |
| Accl_0476 | C1 | arCOG05380 | S | -                                               | 332797181 | 197  | Crenarchaeota | Acidianus hospitalis W1              |
| Accl_0477 | C1 | arCOG00194 | V | CcmA                                            | 15921875  | 315  | Crenarchaeota | Acidianus hospitalis W1              |
| Accl_0478 | C1 | arCOG03849 | S | Uncharacterized conserved protein               | 15921876  | 118  | Crenarchaeota | Sulfolobus tokodaii str. 7           |
| Accl_0479 | C1 | arCOG02469 | F | PurE                                            | 70606690  | 30.7 | Crenarchaeota | Sulfolobus tokodaii str. 7           |
| Accl_0480 | C1 | arCOG03287 | G | GDB1                                            | 15921049  | 456  | Crenarchaeota | Sulfolobus tokodaii str. 7           |
| Accl_0481 | C1 | arCOG03285 | G | SGA1                                            | 15921050  | 236  | Crenarchaeota | Sulfolobus tokodaii str. 7           |
| Accl_0482 | C1 | arCOG06666 | M | GCD1                                            | 15921051  | 150  | Crenarchaeota | Sulfolobus tokodaii str. 7           |
| Accl_0483 | C1 | arCOG03278 | G | -                                               | 70606970  | 507  | Crenarchaeota | Sulfolobus acidocaldarius DSM 639    |
| Accl_0484 | C1 | arCOG00600 | R | -                                               | 15921048  | 962  | Crenarchaeota | Sulfolobus tokodaii str. 7           |
| Accl_0485 | C1 | arCOG01630 | J | TdcF                                            | 145591472 | 1406 | Crenarchaeota | Pyrobaculum arsenicum DSM 13514      |
| Accl_0486 | C1 | arCOG00601 | R | -                                               | 15922637  | 174  | Crenarchaeota | Sulfolobus tokodaii str. 7           |
| Accl_0487 | C1 | arCOG02689 | G | ProP                                            | 307594709 | 250  | Crenarchaeota | Vulcanisaeta distributa DSM 14429    |
| Accl_0488 | C1 | arCOG02881 | P | ECM27                                           | 332797182 | 293  | Crenarchaeota | Acidianus hospitalis W1              |
| Accl_0489 | C1 | arCOG03016 | M | WcaG                                            | 15922179  | 226  | Crenarchaeota | Sulfolobus tokodaii str. 7           |
| Accl_0490 | C1 | arCOG04307 | J | CalA                                            | 70606982  | 52.8 | Crenarchaeota | Sulfolobus acidocaldarius DSM 639    |
| Accl_0491 | C1 | arCOG05972 | S | Uncharacterized conserved protein               | 15921056  | 421  | Crenarchaeota | Sulfolobus tokodaii str. 7           |
| Accl_0492 | C1 | arCOG05973 | H | UbiE                                            | 15897943  | 415  | Crenarchaeota | Sulfolobus solfataricus P2           |
| Accl_0493 | C1 | arCOG00631 | R | -                                               | 15921060  | 160  | Crenarchaeota | Sulfolobus tokodaii str. 7           |
| Accl_0494 | C1 | arCOG02869 | Q | FrnE                                            | 15921061  | 583  | Crenarchaeota | Sulfolobus tokodaii str. 7           |
| Accl_0495 | C1 | arCOG00600 | R | -                                               | 15922313  | 191  | Crenarchaeota | Sulfolobus tokodaii str. 7           |
| Accl_0496 | C1 | arCOG02900 | R | -                                               | 15921062  | 190  | Crenarchaeota | Sulfolobus tokodaii str. 7           |
| Accl_0497 | C1 | arCOG05332 | T | -                                               | 15921063  | 82.4 | Crenarchaeota | Sulfolobus tokodaii str. 7           |
| Accl_0498 | C1 | arCOG02900 | R | -                                               | 15897956  | 387  | Crenarchaeota | Sulfolobus solfataricus P2           |
| Accl_0499 | C1 | arCOG01389 | M | domain                                          | 146303143 | 129  | Crenarchaeota | Metatollosphaera sedula DSM 5348     |
| Accl_0500 | C1 | arCOG01698 | E | LeuC                                            | 15920819  | 379  | Crenarchaeota | Sulfolobus tokodaii str. 7           |
| Accl_0501 | C1 | arCOG02230 | S | LeuD                                            | 15920820  | 128  | Crenarchaeota | Sulfolobus tokodaii str. 7           |
| Accl_0502 | C1 | arCOG07348 | S | Uncharacterized conserved protein               | 15921948  | 45.1 | Crenarchaeota | Sulfolobus tokodaii str. 7           |
| Accl_0504 | C1 | -          | - | Uncharacterized protein                         | -         | -    | -             | -                                    |
| Accl_0503 | C1 | arCOG03660 | G | ProP                                            | 15898686  | 161  | Crenarchaeota | Sulfolobus solfataricus P2           |
| Accl_0505 | C1 | arCOG00271 | G | RhaT                                            | 15921909  | 221  | Crenarchaeota | Sulfolobus tokodaii str. 7           |
| Accl_0506 | C1 | arCOG02266 | P | CorA                                            | 15898148  | 358  | Crenarchaeota | Sulfolobus solfataricus P2           |
| Accl_0507 | C1 | arCOG01554 | C | NuoB                                            | 146304760 | 832  | Crenarchaeota | Metatollosphaera sedula DSM 5348     |
| Accl_0508 | C1 | arCOG01952 | J | SUA5                                            | 15921819  | 201  | Crenarchaeota | Sulfolobus tokodaii str. 7           |
| Accl_0509 | C1 | arCOG01940 | H | BirA                                            | 70607375  | 80.9 | Crenarchaeota | Sulfolobus acidocaldarius DSM 639    |
| Accl_0510 | C1 | arCOG02052 | T | UspA                                            | 15921817  | 441  | Crenarchaeota | Sulfolobus tokodaii str. 7           |
| Accl_0511 | C1 | arCOG03322 | R | TidD                                            | 330834144 | 312  | Crenarchaeota | Metatollosphaera cuprina Ar-4        |
| Accl_0512 | C1 | arCOG03321 | R | TidD                                            | 332796771 | 81.6 | Crenarchaeota | Acidianus hospitalis W1              |
| Accl_0513 | C1 | arCOG01351 | E | THA                                             | 342306522 | 164  | Crenarchaeota | Sulfolobus tokodaii str. 7           |
| Accl_0514 | C1 | arCOG00479 | O | CyoE                                            | 15921811  | 304  | Crenarchaeota | Sulfolobus tokodaii str. 7           |
| Accl_0515 | C1 | arCOG07286 | S | Uncharacterized conserved protein               | 15897565  | 941  | Crenarchaeota | Sulfolobus solfataricus P2           |
| Accl_0517 | C1 | -          | - | Uncharacterized protein                         | -         | -    | -             | -                                    |
| Accl_0516 | C1 | arCOG00946 | O | PIIA                                            | 15921808  | 341  | Crenarchaeota | Sulfolobus tokodaii str. 7           |
| Accl_0519 | C1 | arCOG03249 | I | FadB                                            | 15921809  | 342  | Crenarchaeota | Sulfolobus tokodaii str. 7           |
| Accl_0519 | C1 | arCOG07226 | S | Uncharacterized conserved protein               | 15921807  | 342  | Crenarchaeota | Sulfolobus tokodaii str. 7           |
| Accl_0520 | C1 | arCOG04298 | L | -                                               | 15921805  | 530  | Crenarchaeota | Sulfolobus tokodaii str. 7           |
| Accl_0521 | C1 | arCOG05997 | S | -                                               | 70607362  | 205  | Crenarchaeota | Sulfolobus acidocaldarius DSM 639    |
| Accl_0522 | C1 | arCOG01091 | S | -                                               | 15921803  | 150  | Crenarchaeota | Sulfolobus tokodaii str. 7           |
| Accl_0523 | C1 | -          | - | Uncharacterized protein                         | 70607360  | 157  | Crenarchaeota | Sulfolobus acidocaldarius DSM 639    |
| Accl_0524 | C1 | arCOG00251 | S | FadB                                            | 15921801  | 623  | Crenarchaeota | Sulfolobus tokodaii str. 7           |
| Accl_0525 | C1 | arCOG04318 | J | -                                               | 146304740 | 303  | Crenarchaeota | Metatollosphaera sedula DSM 5348     |
| Accl_0526 | C1 | arCOG01589 | H | RimK                                            | 15921799  | 369  | Crenarchaeota | Sulfolobus tokodaii str. 7           |
| Accl_0527 | C1 | arCOG01094 | E | CarB                                            | 332796788 | 288  | Crenarchaeota | Acidianus hospitalis W1              |
| Accl_0528 | C1 | arCOG00064 | E | CarA                                            | 15921797  | 635  | Crenarchaeota | Sulfolobus tokodaii str. 7           |
| Accl_0529 | C1 | arCOG01748 | E | ArgH                                            | 374634004 | 32.3 | Crenarchaeota | Metatollosphaera yellowstonensis MK1 |
| Accl_0530 | C1 | arCOG00112 | E | ArgG                                            | 374634005 | 99   | Crenarchaeota | Metatollosphaera yellowstonensis MK1 |
| Accl_0531 | C1 | arCOG01009 | V | -                                               | 18312663  | 105  | Crenarchaeota | Pyrobaculum aerophilum str. IM2      |
| Accl_0532 | C1 | arCOG05996 | S | Uncharacterized conserved protein               | 15897550  | 735  | Crenarchaeota | Sulfolobus solfataricus P2           |
| Accl_0533 | C1 | arCOG00639 | F | PurM                                            | 15921793  | 382  | Crenarchaeota | Sulfolobus tokodaii str. 7           |
| Accl_0534 | C1 | arCOG04415 | F | PurD                                            | 15921792  | 42.7 | Crenarchaeota | Sulfolobus tokodaii str. 7           |
| Accl_0535 | C1 | arCOG00094 | F | PurF                                            | 15921791  | 286  | Crenarchaeota | Sulfolobus tokodaii str. 7           |
| Accl_0536 | C1 | arCOG00093 | F | PurF                                            | 332796796 | 207  | Crenarchaeota | Acidianus hospitalis W1              |
| Accl_0537 | C1 | arCOG00641 | F | PurL                                            | 15921789  | 221  | Crenarchaeota | Sulfolobus tokodaii str. 7           |
| Accl_0538 | C1 | arCOG00102 | F | PurL                                            | 342306512 | 109  | Crenarchaeota | Sulfolobus tokodaii str. 7           |
| Accl_0539 | C1 | arCOG04462 | F | PurC                                            | 15921787  | 156  | Crenarchaeota | Sulfolobus tokodaii str. 7           |
| Accl_0540 | C1 | arCOG04421 | F | PurC                                            | 15921786  | 672  | Crenarchaeota | Sulfolobus tokodaii str. 7           |
| Accl_0541 | C1 | arCOG01136 | R | ARC1                                            | 15921785  | 215  | Crenarchaeota | Sulfolobus tokodaii str. 7           |
| Accl_0542 | C1 | arCOG00352 | R | -                                               | 15921784  | 49.7 | Crenarchaeota | Sulfolobus tokodaii str. 7           |
| Accl_0543 | C1 | arCOG02173 | O | NrdG                                            | 15921783  | 458  | Crenarchaeota | Sulfolobus tokodaii str. 7           |
| Accl_0544 | C1 | arCOG01519 | J | TW3                                             | 15921782  | 139  | Crenarchaeota | Sulfolobus tokodaii str. 7           |
| Accl_0545 | C1 | arCOG07225 | S | -                                               | 15921781  | 415  | Crenarchaeota | Sulfolobus tokodaii str. 7           |
| Accl_0546 | C1 | arCOG01068 | C | Lpd                                             | 146304719 | 473  | Crenarchaeota | Metatollosphaera sedula DSM 5348     |
| Accl_0547 | C1 | arCOG00454 | D | ESCRTIII                                        | 15921778  | 303  | Crenarchaeota | Sulfolobus tokodaii str. 7           |
| Accl_0548 | C1 | arCOG01238 | P | PhoU                                            | 374634024 | 738  | Crenarchaeota | Metatollosphaera yellowstonensis MK1 |
| Accl_0549 | C1 | arCOG03882 | R | -                                               | 332796808 | 952  | Crenarchaeota | Acidianus hospitalis W1              |
| Accl_0550 | C1 | arCOG00081 | R | PyrF                                            | 332796809 | 178  | Crenarchaeota | Acidianus hospitalis W1              |
| Accl_0551 | C1 | arCOG00029 | F | PyrE                                            | 15921774  | 358  | Crenarchaeota | Sulfolobus tokodaii str. 7           |
| Accl_0552 | C1 | arCOG00911 | F | PyrB                                            | 15921773  | 216  | Crenarchaeota | Sulfolobus tokodaii str. 7           |
| Accl_0553 | C1 | arCOG04229 | F | PyrI                                            | 15897529  | 526  | Crenarchaeota | Sulfolobus solfataricus P2           |
| Accl_0554 | C1 | arCOG02199 | H | UbiB                                            | 332796813 | 463  | Crenarchaeota | Acidianus hospitalis W1              |
| Accl_0555 | C1 | arCOG00689 | F | PyrC                                            | 22001887  | 419  | Crenarchaeota | Sulfolobus tokodaii str. 7           |
| Accl_0556 | C1 | arCOG00603 | F | PyrD                                            | 70607328  | 301  | Crenarchaeota | Sulfolobus acidocaldarius DSM 639    |
| Accl_0557 | C1 | arCOG05995 | S | -                                               | 15921768  | 164  | Crenarchaeota | Sulfolobus tokodaii str. 7           |
| Accl_0558 | C1 | arCOG05994 | S | -                                               | 15921767  | 107  | Crenarchaeota | Sulfolobus tokodaii str. 7           |
| Accl_0559 | C1 | arCOG01997 | U | MarC                                            | 15921766  | 131  | Crenarchaeota | Sulfolobus tokodaii str. 7           |
| Accl_0560 | C1 | arCOG01580 | K | Lrp                                             | 15921765  | 613  | Crenarchaeota | Sulfolobus tokodaii str. 7           |
| Accl_0561 | C1 | arCOG00580 | R | RPB9                                            | 15921764  | 113  | Crenarchaeota | Sulfolobus tokodaii str. 7           |
| Accl_0562 | C1 | arCOG08317 | J | -                                               | 343773666 | 36.2 | Crenarchaeota | Sulfolobus tokodaii str. 7           |
| Accl_0563 | C1 | arCOG01357 | C | -                                               | 15921762  | 117  | Crenarchaeota | Sulfolobus tokodaii str. 7           |
| Accl_0564 | C1 | arCOG00403 | J | SerS                                            | 332796823 | 479  | Crenarchaeota | Acidianus hospitalis W1              |
| Accl_0565 | C1 | arCOG01845 | R | Paad                                            | 15921760  | 92.8 | Crenarchaeota | Sulfolobus tokodaii str. 7           |
| Accl_0566 | C1 | arCOG02676 | E | HsiI                                            | 70607318  | 108  | Crenarchaeota | Sulfolobus acidocaldarius DSM 639    |
| Accl_0567 | C1 | arCOG00089 | E | HsiH                                            | 332796826 | 36.2 | Crenarchaeota | Acidianus hospitalis W1              |
| Accl_0568 | C1 | arCOG02677 | E | HsiI                                            | 146304696 | 168  | Crenarchaeota | Metatollosphaera sedula DSM 5348     |
| Accl_0569 | C1 | arCOG04352 | E | HsiD                                            | 332796828 | 449  | Crenarchaeota | Acidianus hospitalis W1              |
| Accl_0570 | C1 | arCOG00617 | E | HsiF                                            | 15921755  | 300  | Crenarchaeota | Sulfolobus tokodaii str. 7           |
| Accl_0571 | C1 | arCOG04398 | E | HsiB                                            | 374634047 | 904  | Crenarchaeota | Metatollosphaera yellowstonensis MK1 |
| Accl_0572 | C1 | arCOG00618 | E | HsiA                                            | 15921753  | 123  | Crenarchaeota | Sulfolobus tokodaii str. 7           |
| Accl_0573 | C1 | arCOG02208 | E | HsiG                                            | 70607311  | 209  | Crenarchaeota | Sulfolobus acidocaldarius DSM 639    |
| Accl_0574 | C1 | arCOG04273 | E | HsiC                                            | 363548423 | 93.6 | Crenarchaeota | Sulfolobus tokodaii str. 7           |
| Accl_0575 | C1 | arCOG05993 | K | -                                               | 15921750  | 741  | Crenarchaeota | Sulfolobus tokodaii str. 7           |
| Accl_0576 | C1 | arCOG00809 | J | LeuS                                            | 48428670  | 330  | Crenarchaeota | Sulfolobus tokodaii str. 7           |
| Accl_0577 | C1 | arCOG00489 | H | -                                               | 15921748  | 234  | Crenarchaeota | Sulfolobus tokodaii str. 7           |
| Accl_0578 | C1 | arCOG00042 | D | MesI                                            | 15921747  | 137  | Crenarchaeota | Sulfolobus tokodaii str. 7           |
| Accl_0579 | C1 | arCOG04140 | S | -                                               | 146304685 | 311  | Crenarchaeota | Metatollosphaera sedula DSM 5348     |
| Accl_0580 | C1 | arCOG00279 | E | SpeD                                            | 15921745  | 69.7 | Crenarchaeota | Sulfolobus tokodaii str. 7           |
| Accl_0581 | C1 | arCOG00570 | C | FixC                                            | 70607303  | 593  | Crenarchaeota | Sulfolobus acidocaldarius DSM 639    |
| Accl_0582 | C1 | arCOG08842 | K | PhnF                                            | 70607302  | 241  | Crenarchaeota | Sulfolobus acidocaldarius DSM 639    |

|           |    |            |   |        |                                                                                                             |           |      |               |                                   |
|-----------|----|------------|---|--------|-------------------------------------------------------------------------------------------------------------|-----------|------|---------------|-----------------------------------|
| Acd1_0583 | C1 | arCOG04076 | H | UbiA   | 4-hydroxybenzoate poly(prenyl)transferase or related prenyltransferase                                      | 15921742  | 176  | Crenarchaeota | Sulfolobus tokodaii str. 7        |
| Acd1_0584 | C1 | arCOG05992 | S | -      | Uncharacterized conserved protein                                                                           | 70607300  | 392  | Crenarchaeota | Sulfolobus acidocaldarius DSM 639 |
| Acd1_0585 | C1 | arCOG03050 | R | -      | Predicted GTPase                                                                                            | 227827818 | 315  | Crenarchaeota | Sulfolobus islandicus M.14.25     |
| Acd1_0586 | C1 | arCOG01665 | S | -      | Zinc-finger domain containing protein (CDGSH-type)                                                          | 332791198 | 65.5 | Crenarchaeota | Acidianus hospitalis W1           |
| Acd1_0587 | C1 | arCOG04046 | R | -      | Predicted phosphatase                                                                                       | 15921739  | 665  | Crenarchaeota | Sulfolobus tokodaii str. 7        |
| Acd1_0588 | C1 | -          | S | -      | Uncharacterized protein                                                                                     | -         | -    | -             | -                                 |
| Acd1_0589 | C1 | arCOG01998 | E | IlvB   | Acetolactate synthase large subunit or other thiamine pyrophosphate-requiring enzyme                        | 15921738  | 201  | Crenarchaeota | Sulfolobus tokodaii str. 7        |
| Acd1_0590 | C1 | arCOG05991 | E | IlvB   | ACT domain                                                                                                  | 15897496  | 322  | Crenarchaeota | Sulfolobus solfataricus P2        |
| Acd1_0591 | C1 | arCOG04465 | E | IlvC   | Ketol-acid reductoisomerase                                                                                 | 15921736  | 373  | Crenarchaeota | Sulfolobus tokodaii str. 7        |
| Acd1_0592 | C1 | arCOG00919 | L | -      | Holliday junction resolvase                                                                                 | 342306492 | 60.5 | Crenarchaeota | Sulfolobus tokodaii str. 7        |
| Acd1_0593 | C1 | arCOG04116 | R | -      | ATPase (PiliI family)                                                                                       | 332796849 | 176  | Crenarchaeota | Acidianus hospitalis W1           |
| Acd1_0594 | C1 | arCOG00334 | H | PDX2   | Predicted glutamine amidotransferase involved in pyridoxine biosynthesis                                    | 15921733  | 114  | Crenarchaeota | Sulfolobus tokodaii str. 7        |
| Acd1_0595 | C1 | arCOG04075 | H | SNZ1   | Pyridoxine biosynthesis enzyme                                                                              | 374630699 | 348  | Crenarchaeota | Metallaphaera yellowstonensis MK1 |
| Acd1_0596 | C1 | arCOG04305 | J | RP25B8 | Ribosomal protein S26                                                                                       | 161751093 | 202  | Crenarchaeota | Sulfolobus tokodaii str. 7        |
| Acd1_0597 | C1 | arCOG04042 | J | ProS   | Prolyl-tRNA synthetase                                                                                      | 70607289  | 290  | Crenarchaeota | Sulfolobus acidocaldarius DSM 639 |
| Acd1_0598 | C1 | arCOG02455 | C | AtpK   | Archaeal/Vacuolar-type Na <sup>+</sup> /H <sup>+</sup> -ATPase, subunit K                                   | 70607288  | 238  | Crenarchaeota | Sulfolobus acidocaldarius DSM 639 |
| Acd1_0599 | C1 | arCOG07285 | C | NtpF   | Archaeal/Vacuolar-type H <sup>+</sup> -ATPase subunit H                                                     | 158987487 | 893  | Crenarchaeota | Sulfolobus solfataricus P2        |
| Acd1_0600 | C1 | arCOG04103 | C | NtpD   | Archaeal/Vacuolar-type H <sup>+</sup> -ATPase subunit D                                                     | 15921727  | 77.8 | Crenarchaeota | Sulfolobus tokodaii str. 7        |
| Acd1_0601 | C1 | arCOG00865 | C | NtpB   | Archaeal/Vacuolar-type H <sup>+</sup> -ATPase subunit B                                                     | 15921226  | 110  | Crenarchaeota | Sulfolobus tokodaii str. 7        |
| Acd1_0602 | C1 | arCOG00868 | C | NtpA   | Archaeal/Vacuolar-type H <sup>+</sup> -ATPase subunit A                                                     | 15921225  | 310  | Crenarchaeota | Sulfolobus tokodaii str. 7        |
| Acd1_0603 | C1 | arCOG00869 | C | NtpE   | Archaeal/Vacuolar-type H <sup>+</sup> -ATPase subunit E                                                     | 330834233 | 212  | Crenarchaeota | Metallaphaera cuprina Ar-4        |
| Acd1_0604 | C1 | arCOG04102 | C | NtpG   | Archaeal/Vacuolar-type H <sup>+</sup> -ATPase subunit F                                                     | 227827835 | 46.6 | Crenarchaeota | Sulfolobus islandicus M.14.25     |
| Acd1_0605 | C1 | arCOG04138 | C | NtpI   | Archaeal/Vacuolar-type H <sup>+</sup> -ATPase subunit I                                                     | 15921722  | 262  | Crenarchaeota | Sulfolobus tokodaii str. 7        |
| Acd1_0606 | C1 | arCOG03051 | J | MetG   | Methylglycine-lyase                                                                                         | 15921721  | 65.5 | Crenarchaeota | Sulfolobus tokodaii str. 7        |
| Acd1_0607 | C1 | arCOG03013 | L | PR12   | Eukaryotic-type DNA primase, large subunit                                                                  | 332796862 | 331  | Crenarchaeota | Acidianus hospitalis W1           |
| Acd1_0608 | C1 | arCOG00670 | I | PgsA   | Phosphatidylglycerophosphate synthase                                                                       | 330834238 | 0    | Crenarchaeota | Metallaphaera cuprina Ar-4        |
| Acd1_0609 | C1 | arCOG04283 | S | -      | Uncharacterized conserved protein                                                                           | 15921718  | 555  | Crenarchaeota | Sulfolobus tokodaii str. 7        |
| Acd1_0610 | C1 | arCOG01631 | Q | -      | SAM-dependent methyltransferase                                                                             | 332796865 | 385  | Crenarchaeota | Acidianus hospitalis W1           |
| Acd1_0611 | C1 | arCOG04251 | S | -      | Uncharacterized conserved protein                                                                           | 15921716  | 520  | Crenarchaeota | Sulfolobus tokodaii str. 7        |
| RNAArgGGC |    |            |   |        | RNAArgGGC                                                                                                   |           |      |               |                                   |
| Acd1_0612 | C1 | arCOG00328 | L | PolB   | DNA polymerase elongation subunit (family B)                                                                | 15921715  | 75.1 | Crenarchaeota | Sulfolobus tokodaii str. 7        |
| Acd1_0613 | C1 | arCOG01397 | M | WcaA   | Glycosyltransferase                                                                                         | 171184954 | 939  | Crenarchaeota | Pyrobaculum neutrophilum V242a    |
| Acd1_0614 | C1 | arCOG07214 | S | -      | Uncharacterized conserved protein                                                                           | 146304383 | 735  | Crenarchaeota | Metallaphaera sedula DSM 5348     |
| Acd1_0615 | C1 | arCOG01751 | J | RPL8A  | Ribosomal protein L7AE                                                                                      | 15921713  | 285  | Crenarchaeota | Sulfolobus tokodaii str. 7        |
| Acd1_0616 | C1 | arCOG04302 | J | GlnS   | Glutamine- or glutamyl-tRNA synthetase                                                                      | 332796279 | 514  | Crenarchaeota | Acidianus hospitalis W1           |
| Acd1_0617 | C1 | arCOG02133 | R | Cof    | HAD superfamily hydrolase                                                                                   | 342306475 | 661  | Crenarchaeota | Sulfolobus tokodaii str. 7        |
| Acd1_0618 | C1 | arCOG04430 | R | -      | HD superfamily phosphohydrolase                                                                             | 15921710  | 585  | Crenarchaeota | Sulfolobus tokodaii str. 7        |
| 5S RNA    |    |            |   |        | 5S RNA                                                                                                      |           |      |               |                                   |
| Acd1_0619 | C1 | arCOG03770 | S | -      | Uncharacterized conserved protein                                                                           | 70607258  | 186  | Crenarchaeota | Sulfolobus acidocaldarius DSM 639 |
| Acd1_0620 | C1 | arCOG04181 | S | -      | Uncharacterized conserved protein                                                                           | 284173403 | 243  | Crenarchaeota | Sulfolobus solfataricus 98/2      |
| Acd1_0621 | C1 | arCOG01001 | J | Map    | Methionine aminopeptidase                                                                                   | 146230473 | 271  | Crenarchaeota | Metallaphaera sedula DSM 5348     |
| Acd1_0622 | C1 | arCOG04097 | R | -      | Zn-dependent hydrolase of the beta-lactamase fold                                                           | 15921707  | 538  | Crenarchaeota | Sulfolobus tokodaii str. 7        |
| Acd1_0623 | C1 | arCOG04410 | J | PheS   | Phenylalanyl-tRNA synthetase alpha subunit                                                                  | 15921705  | 408  | Crenarchaeota | Sulfolobus tokodaii str. 7        |
| Acd1_0624 | C1 | arCOG04012 | J | PheT   | Phenylalanyl-tRNA synthetase beta subunit                                                                   | 15921704  | 880  | Crenarchaeota | Sulfolobus tokodaii str. 7        |
| Acd1_0625 | C1 | arCOG01648 | R | MhpC   | Alpha/beta superfamily hydrolase                                                                            | 15921703  | 341  | Crenarchaeota | Sulfolobus tokodaii str. 7        |
| Acd1_0626 | C1 | arCOG00215 | R | ClnA   | Predicted nucleotide-utilizing enzyme related to molybdopterin-biosynthesis enzyme MoeA                     | 332796269 | 351  | Crenarchaeota | Acidianus hospitalis W1           |
| Acd1_0627 | C1 | arCOG04952 | K | AROB   | Transcriptional regulators containing a DNA-binding HTH domain and an aminotransferase domain (MocR family) | 15921700  | 289  | Crenarchaeota | Sulfolobus tokodaii str. 7        |
| Acd1_0628 | C1 | arCOG05990 | C | Qor    | NAD(PH):quinone reductase or related Zn-dependent oxidoreductase                                            | 332796267 | 107  | Crenarchaeota | Acidianus hospitalis W1           |
| Acd1_0629 | C1 | arCOG05989 | K | -      | Transcriptional regulator, xre family                                                                       | 332796266 | 73.9 | Crenarchaeota | Acidianus hospitalis W1           |
| Acd1_0630 | C1 | arCOG05987 | K | -      | Uncharacterized conserved protein                                                                           | 15921697  | 188  | Crenarchaeota | Sulfolobus tokodaii str. 7        |
| Acd1_0631 | C1 | arCOG04166 | S | -      | Uncharacterized conserved protein                                                                           | 15897069  | 55.1 | Crenarchaeota | Sulfolobus solfataricus P2        |
| Acd1_0632 | C1 | arCOG00610 | K | -      | Predicted transcriptional regulator, contains C-terminal CBS domains                                        | 70607246  | 82   | Crenarchaeota | Sulfolobus acidocaldarius DSM 639 |
| Acd1_0633 | C1 | arCOG01138 | R | -      | Predicted metal-dependent protease of the PAD1/IAB1 superfamily                                             | 146304861 | 194  | Crenarchaeota | Metallaphaera sedula DSM 5348     |
| Acd1_0634 | C1 | arCOG00557 | R | Lhr    | Lhr-like helicase                                                                                           | 15921693  | 65.1 | Crenarchaeota | Sulfolobus tokodaii str. 7        |
| Acd1_0635 | C1 | arCOG01392 | M | -      | Glycosyltransferase                                                                                         | 146230473 | 424  | Crenarchaeota | Acidianus hospitalis W1           |
| Acd1_0636 | C1 | arCOG01875 | K | -      | ParB-like nuclease domain                                                                                   | 70607242  | 172  | Crenarchaeota | Sulfolobus acidocaldarius DSM 639 |
| Acd1_0637 | C1 | arCOG04559 | L | Nth    | EndoIII-related endonuclease                                                                                | 15921690  | 285  | Crenarchaeota | Sulfolobus tokodaii str. 7        |
| Acd1_0638 | C1 | arCOG07276 | N | 0      | Pilin/Flagellin                                                                                             | 227831025 | 135  | Crenarchaeota | Sulfolobus islandicus L.S.2.15    |
| Acd1_0639 | C1 | arCOG05987 | N | 0      | Pilin/Flagellin                                                                                             | 70607240  | 41.6 | Crenarchaeota | Sulfolobus acidocaldarius DSM 639 |
| Acd1_0640 | C1 | arCOG01815 | N | TadC   | Pil plus assembly protein TadC                                                                              | 70607239  | 190  | Crenarchaeota | Sulfolobus acidocaldarius DSM 639 |
| Acd1_0641 | C1 | -          | S | -      | Uncharacterized protein                                                                                     | -         | -    | -             | -                                 |
| Acd1_0642 | C1 | arCOG01817 | N | VirB11 | Type IV secretory pathway, VirB11 component, or related ATPase involved in archaeal flagella biosynthesis   | 15921686  | 146  | Crenarchaeota | Sulfolobus tokodaii str. 7        |
| Acd1_0643 | C1 | arCOG05986 | N | -      | Predicted component of pilli system                                                                         | 15921685  | 97.4 | Crenarchaeota | Sulfolobus tokodaii str. 7        |
| Acd1_0644 | C1 | arCOG05985 | R | -      | Predicted periplasmic solute-binding protein                                                                | 15921684  | 56.6 | Crenarchaeota | Sulfolobus tokodaii str. 7        |
| Acd1_0645 | C1 | arCOG05348 | R | HcaD   | NAD(PH)-dependent dehydrogenase                                                                             | 15897064  | 498  | Crenarchaeota | Sulfolobus solfataricus P2        |
| Acd1_0646 | C1 | arCOG05348 | R | HcaD   | NAD(PH)-dependent dehydrogenase                                                                             | 227822820 | 600  | Crenarchaeota | Sulfolobus islandicus M.14.25     |
| Acd1_0647 | C1 | arCOG01241 | L | XerC   | Integrase                                                                                                   | 15921682  | 534  | Crenarchaeota | Sulfolobus tokodaii str. 7        |
| Acd1_0648 | C1 | arCOG01849 | R | Paay   | Isoleucine patch superfamily protein                                                                        | 385773702 | 89.7 | Crenarchaeota | Sulfolobus islandicus HVE10/4     |
| Acd1_0649 | C1 | arCOG01026 | J | Sun    | RNA methylase associated PUA domain                                                                         | 15921679  | 54.3 | Crenarchaeota | Sulfolobus tokodaii str. 7        |
| Acd1_0650 | C1 | arCOG00986 | J | -      | Predicted sugar kinase                                                                                      | 15921678  | 33.1 | Crenarchaeota | Sulfolobus tokodaii str. 7        |
| Acd1_0651 | C1 | arCOG03857 | J | CalC   | Acyl-CoA synthetase (AMP-forming)/AMP-acid ligase II                                                        | 15921677  | 60.5 | Crenarchaeota | Sulfolobus tokodaii str. 7        |
| Acd1_0652 | C1 | arCOG01972 | O | TrxA   | Thiol-disulfide isomerase or thioredoxin                                                                    | 342306464 | 472  | Crenarchaeota | Sulfolobus tokodaii str. 7        |
| Acd1_0653 | C1 | arCOG05705 | G | MalK   | ABC-type sugar transport system, ATPase component                                                           | 332796952 | 278  | Crenarchaeota | Acidianus hospitalis W1           |
| Acd1_0654 | C1 | arCOG01909 | E | GlnA   | Glutamine synthetase                                                                                        | 332796953 | 615  | Crenarchaeota | Acidianus hospitalis W1           |
| Acd1_0655 | C1 | arCOG04542 | H | FoIE   | GTP cyclohydrolase I                                                                                        | 146304374 | 239  | Crenarchaeota | Metallaphaera sedula DSM 5348     |
| Acd1_0656 | C1 | arCOG01002 | E | PnpP   | Xaa-Pro aminopeptidase                                                                                      | 332796956 | 212  | Crenarchaeota | Acidianus hospitalis W1           |
| Acd1_0657 | C1 | arCOG00930 | H | MoaA   | Molybdenum cofactor biosynthesis enzyme                                                                     | 15897297  | 553  | Crenarchaeota | Sulfolobus solfataricus P2        |
| Acd1_0658 | C1 | arCOG06088 | S | -      | Uncharacterized conserved protein                                                                           | 332796958 | 152  | Crenarchaeota | Acidianus hospitalis W1           |
| Acd1_0659 | C1 | arCOG01186 | T | -      | Mn <sup>2+</sup> -dependent serine/threonine protein kinase                                                 | 146304371 | 288  | Crenarchaeota | Metallaphaera sedula DSM 5348     |
| Acd1_0660 | C1 | arCOG01430 | E | CysK   | Cysteine synthase                                                                                           | 70607219  | 147  | Crenarchaeota | Sulfolobus acidocaldarius DSM 639 |
| Acd1_0661 | C1 | arCOG02062 | O | SirA   | Predicted redox protein, regulator of disulfide bond formation                                              | 15921658  | 551  | Crenarchaeota | Sulfolobus tokodaii str. 7        |
| Acd1_0662 | C1 | arCOG02067 | R | -      | Predicted peroxidinoid                                                                                      | 332796962 | 94.4 | Crenarchaeota | Acidianus hospitalis W1           |
| Acd1_0663 | C1 | arCOG04321 | S | -      | Uncharacterized conserved protein with similarity to Ribonucleotide reductase and Pyruvate formate lyase    | 284174542 | 551  | Crenarchaeota | Sulfolobus solfataricus 98/2      |
| Acd1_0664 | C1 | arCOG00318 | P | PhoU   | Phosphate uptake regulator                                                                                  | 374633603 | 233  | Crenarchaeota | Metallaphaera yellowstonensis MK1 |
| Acd1_0665 | C1 | arCOG04481 | H | PncB   | Nicotinic acid phosphoribosyltransferase                                                                    | 15921664  | 561  | Crenarchaeota | Sulfolobus tokodaii str. 7        |
| Acd1_0666 | C1 | arCOG03467 | R | RP519A | Ribosomal protein S19E (S16A)                                                                               | 15921663  | 498  | Crenarchaeota | Sulfolobus tokodaii str. 7        |
| Acd1_0667 | C1 | arCOG04179 | R | -      | DNA-binding protein                                                                                         | 374633606 | 32.7 | Crenarchaeota | Metallaphaera yellowstonensis MK1 |
| Acd1_0668 | C1 | arCOG04177 | J | RPL39  | Ribosomal protein L39E                                                                                      | 15897288  | 246  | Crenarchaeota | Sulfolobus solfataricus P2        |
| Acd1_0669 | C1 | arCOG04473 | J | RPL31A | Ribosomal protein L31E                                                                                      | 15921660  | 126  | Crenarchaeota | Sulfolobus tokodaii str. 7        |
| Acd1_0670 | C1 | arCOG04176 | J | TIF6   | Translation initiation factor 6 (eIF-6)                                                                     | 15921658  | 73.9 | Crenarchaeota | Sulfolobus tokodaii str. 7        |
| Acd1_0671 | C1 | arCOG04175 | J | RPL20A | Ribosomal protein L20A (L18A)                                                                               | 332796971 | 169  | Crenarchaeota | Acidianus hospitalis W1           |
| Acd1_0672 | C1 | arCOG01341 | O | GIMS   | Predicted prefoldin, molecular chaperone implicated in de novo protein folding                              | 146304393 | 257  | Crenarchaeota | Metallaphaera sedula DSM 5348     |
| Acd1_0673 | C1 | arCOG01227 | Y | FtsY   | Signal recognition particle GTPase                                                                          | 60623873  | 301  | Crenarchaeota | Sulfolobus tokodaii str. 7        |
| Acd1_0674 | C1 | arCOG02204 | O | Sss1   | Preprotein translocase subunit Sss1                                                                         | 15921654  | 36.6 | Crenarchaeota | Sulfolobus tokodaii str. 7        |
| Acd1_0675 | C1 | arCOG01920 | K | NusG   | Transcription antiterminator NusG                                                                           | 15921653  | 191  | Crenarchaeota | Sulfolobus tokodaii str. 7        |
| Acd1_0676 | C1 | arCOG04372 | J | RplK   | Ribosomal protein L11                                                                                       | 227830761 | 362  | Crenarchaeota | Sulfolobus islandicus L.S.2.15    |
| Acd1_0677 | C1 | arCOG04289 | J | RplA   | Ribosomal protein L1                                                                                        | 15921651  | 190  | Crenarchaeota | Sulfolobus tokodaii str. 7        |
| Acd1_0678 | C1 | arCOG04288 | J | RplJ   | Ribosomal protein L10                                                                                       | 15897278  | 153  | Crenarchaeota | Sulfolobus solfataricus P2        |
| Acd1_0679 | C1 | arCOG04287 | J | RPP1A  | Ribosomal protein L12E/L44/L45/RPP1/RPP2                                                                    | 15921649  | 667  | Crenarchaeota | Sulfolobus tokodaii str. 7        |
| Acd1_0680 | C1 | arCOG01255 | J | AlaS   | Alanine-tRNA synthetase                                                                                     | 15921648  | 553  | Crenarchaeota | Sulfolobus tokodaii str. 7        |
| Acd1_0681 | C1 | arCOG03229 | S | -      | Uncharacterized conserved protein                                                                           | 15921647  | 33.1 | Crenarchaeota | Sulfolobus tokodaii str. 7        |
| RNAArgCT  |    |            |   |        | RNAArgCT                                                                                                    |           |      |               |                                   |
| Acd1_0682 | C1 | arCOG00288 | C | NfnB   | Nitroreductase                                                                                              | 15920926  | 639  | Crenarchaeota | Sulfolobus tokodaii str. 7        |
| RNAmetCAT |    |            |   |        | RNAmetCAT                                                                                                   |           |      |               |                                   |
|           |    |            |   |        |                                                                                                             |           |      |               |                                   |

|            |    |            |   |          |                                                                                                                |           |      |               |                                     |
|------------|----|------------|---|----------|----------------------------------------------------------------------------------------------------------------|-----------|------|---------------|-------------------------------------|
| Acd1_0711  | C1 | arCOG01553 | C | -        | Ni-Fe-hydrogenase III small subunit                                                                            | 15897890  | 272  | Crenarchaeota | Sulfolobus solfataricus P2          |
| Acd1_0712  | C1 | arCOG01537 | C | NuoM     | NADH:ubiquinone oxidoreductase subunit 4 (chain M)                                                             | 15897889  | 1795 | Crenarchaeota | Sulfolobus solfataricus P2          |
| Acd1_0713  | C1 | arCOG08457 | S | -        | Uncharacterized conserved protein                                                                              | 15897888  | 295  | Crenarchaeota | Sulfolobus solfataricus P2          |
| Acd1_0714  | C1 | arCOG00832 | K | AbrB     | Transcriptional regulator AbrB                                                                                 | 22957843  | 238  | Crenarchaeota | Sulfolobus islandicus V.G.57.14     |
| Acd1_0715  | C1 | arCOG00713 | V | -        | PIM domain containing protein                                                                                  | 15898764  | 1102 | Crenarchaeota | Sulfolobus solfataricus P2          |
| Acd1_0716  | C1 | arCOG05276 | L | -        | Pyrimidine dimer DNA glycosylase, T4 endov' family                                                             | 229582386 | 874  | Crenarchaeota | Sulfolobus islandicus Y.N.15.1      |
| Acd1_0717  | C1 | arCOG07088 | S | -        | Uncharacterized conserved protein                                                                              | 15922955  | 271  | Crenarchaeota | Sulfolobus tokodaii str. 7          |
| Acd1_0718  | C1 | arCOG04217 | R | -        | Predicted metalloproteinase                                                                                    | 15921157  | 187  | Crenarchaeota | Sulfolobus tokodaii str. 7          |
| Acd1_0719  | C1 | arCOG01339 | H | LpIA     | Lipoate-protein ligase A                                                                                       | 332797361 | 606  | Crenarchaeota | Acidithiobacillus walsbyi           |
| Acd1_0720  | C1 | arCOG01303 | E | GcvH     | Glycine cleavage system H protein (lipoate-binding)                                                            | 332797361 | 65.9 | Crenarchaeota | Acidithiobacillus walsbyi           |
| Acd1_0721  | C1 | arCOG05920 | S | -        | Uncharacterized conserved protein                                                                              | 332797363 | 98.6 | Crenarchaeota | Acidithiobacillus walsbyi           |
| Acd1_0722  | C1 | arCOG03686 | O | -        | Predicted redox protein, regulator of disulfide bond formation                                                 | 330834625 | 220  | Crenarchaeota | Metallosphaera cuprina Ar-4         |
| Acd1_0723  | C1 | arCOG05921 | S | -        | Uncharacterized conserved protein                                                                              | 332797365 | 183  | Crenarchaeota | Acidithiobacillus walsbyi           |
| Acd1_0724  | C1 | arCOG00338 | C | HdrB     | Heterodisulfide reductase, subunit B                                                                           | 332797366 | 252  | Crenarchaeota | Acidithiobacillus walsbyi           |
| Acd1_0725  | C1 | arCOG00966 | C | HdrC     | Heterodisulfide reductase, subunit C                                                                           | 15922184  | 109  | Crenarchaeota | Sulfolobus tokodaii str. 7          |
| Acd1_0726  | C1 | arCOG05916 | C | -        | Predicted heterodisulfide reductase subunit                                                                    | 15922185  | 340  | Crenarchaeota | Sulfolobus tokodaii str. 7          |
| Acd1_0727  | C1 | arCOG02335 | O | HdrA     | Heterodisulfide reductase, subunit A                                                                           | 332797369 | 494  | Crenarchaeota | Acidithiobacillus walsbyi           |
| Acd1_0728  | C1 | arCOG00342 | C | HdrB     | Heterodisulfide reductase, subunit B                                                                           | 332797370 | 76.6 | Crenarchaeota | Acidithiobacillus walsbyi           |
| Acd1_0729  | C1 | arCOG00965 | C | HdrC     | Heterodisulfide reductase, subunit C                                                                           | 332797371 | 232  | Crenarchaeota | Acidithiobacillus walsbyi           |
| Acd1_0730  | C1 | -          | S | -        | Uncharacterized protein                                                                                        | 15921429  | 309  | Crenarchaeota | Sulfolobus tokodaii str. 7          |
| Acd1_0731  | C1 | -          | S | -        | Uncharacterized protein                                                                                        | 15921104  | 221  | Crenarchaeota | Sulfolobus tokodaii str. 7          |
| Acd1_0732  | C1 | arCOG07335 | Q | -        | SAM-dependent methyltransferase                                                                                | 332797382 | 308  | Crenarchaeota | Acidithiobacillus walsbyi           |
| Acd1_0733  | C1 | arCOG04507 | Q | -        | Methane/Pheno/Toluene Hydroxylase component                                                                    | 330834537 | 315  | Crenarchaeota | Metallosphaera cuprina Ar-4         |
| Acd1_0734  | C1 | arCOG05895 | S | -        | Uncharacterized conserved protein                                                                              | 15922196  | 457  | Crenarchaeota | Sulfolobus tokodaii str. 7          |
| Acd1_0735  | C1 | arCOG07189 | S | -        | Uncharacterized conserved protein                                                                              | 146304316 | 441  | Crenarchaeota | Metallosphaera sedula DSM 5348      |
| Acd1_0736  | C1 | arCOG02118 | O | TrxA     | Thiol-disulfide isomerase or thioredoxin                                                                       | 332797376 | 359  | Crenarchaeota | Acidithiobacillus walsbyi           |
| Acd1_0737  | C1 | arCOG05917 | S | -        | Uncharacterized conserved protein                                                                              | 15922210  | 31.2 | Crenarchaeota | Sulfolobus tokodaii str. 7          |
| Acd1_0738  | C1 | -          | S | -        | Uncharacterized protein                                                                                        | 15922209  | 336  | Crenarchaeota | Sulfolobus tokodaii str. 7          |
| Acd1_0739  | C1 | arCOG01303 | E | GcvH     | Glycine cleavage system H protein (lipoate-binding)                                                            | 15922208  | 367  | Crenarchaeota | Sulfolobus tokodaii str. 7          |
| Acd1_0740  | C1 | arCOG05919 | R | Gph      | HAD superfamily hydrolase                                                                                      | 385775707 | 281  | Crenarchaeota | Sulfolobus islandicus REY15A        |
| Acd1_0741  | C1 | arCOG00369 | H | -        | Predicted ATP-coupled superfamily ATPase                                                                       | 70605976  | 98.2 | Crenarchaeota | Sulfolobus acidocaldarius DSM 639   |
| Acd1_0742  | C1 | arCOG05918 | S | -        | Uncharacterized conserved protein                                                                              | 15922202  | 633  | Crenarchaeota | Sulfolobus tokodaii str. 7          |
| Acd1_0743  | C1 | arCOG02072 | O | SirA     | Predicted redox protein, regulator of disulfide bond formation                                                 | 15922200  | 46.2 | Crenarchaeota | Sulfolobus tokodaii str. 7          |
| Acd1_0744  | C1 | arCOG01939 | H | LpIA     | Lipoate-protein ligase A                                                                                       | 15922201  | 435  | Crenarchaeota | Sulfolobus tokodaii str. 7          |
| Acd1_0745  | C1 | arCOG05825 | R | -        | Radical SAM superfamily enzyme                                                                                 | 15922200  | 46.2 | Crenarchaeota | Sulfolobus tokodaii str. 7          |
| Acd1_0746  | C1 | arCOG00662 | R | -        | Biotin synthase-related enzyme                                                                                 | 227830085 | 184  | Crenarchaeota | Sulfolobus islandicus L.S.2.15      |
| Acd1_0747  | C1 | arCOG02979 | S | -        | Uncharacterized conserved protein                                                                              | 15922198  | 144  | Crenarchaeota | Sulfolobus tokodaii str. 7          |
| Acd1_0748  | C1 | arCOG00326 | R | AcuC     | Deacetylase, including yeast histone deacetylase and acetoin utilization protein                               | 15922193  | 139  | Crenarchaeota | Sulfolobus tokodaii str. 7          |
| Acd1_0749  | C1 | arCOG01068 | C | Lpd      | Pyruvate/2-oxoglutarate dehydrogenase complex, dihydrolipoamide dehydrogenase (E3) component or related enzyme | 15922191  | 79.3 | Crenarchaeota | Sulfolobus tokodaii str. 7          |
| Acd1_0750  | C1 | arCOG02066 | R | -        | Predicted peroxidase                                                                                           | 15922190  | 78.2 | Crenarchaeota | Sulfolobus tokodaii str. 7          |
| Acd1_0751  | C1 | arCOG02064 | R | -        | Peroxidase family protein                                                                                      | 15922189  | 100  | Crenarchaeota | Sulfolobus tokodaii str. 7          |
| Acd1_0752  | C1 | arCOG02062 | O | SirA     | Predicted redox protein, regulator of disulfide bond formation                                                 | 18181617  | 647  | Crenarchaeota | Acidithiobacillus walsbyi           |
| Acd1_0753  | C1 | arCOG02880 | P | CynT     | Carbonic anhydrase                                                                                             | 15921633  | 274  | Crenarchaeota | Sulfolobus tokodaii str. 7          |
| Acd1_0754  | C1 | arCOG02079 | E | SpeB     | S-adenosylmethionine decarboxylase/arginine decarboxylase                                                      | 15921634  | 35.4 | Crenarchaeota | Sulfolobus tokodaii str. 7          |
| Acd1_0755  | C1 | arCOG01767 | E | PlsG     | 3-hydroxy-3-methylglutaryl CoA synthase                                                                        | 70607019  | 114  | Crenarchaeota | Sulfolobus acidocaldarius DSM 639   |
| Acd1_0756  | C1 | arCOG01278 | H | Paal     | Acetyl-CoA acetyltransferase                                                                                   | 342306448 | 184  | Crenarchaeota | Sulfolobus tokodaii str. 7          |
| Acd1_0757  | C1 | arCOG01285 | R | -        | Predicted nucleic-acid-binding protein containing a Zn-ribbon                                                  | 70607117  | 163  | Crenarchaeota | Sulfolobus tokodaii str. 7          |
| Acd1_0758  | C1 | arCOG04260 | I | HMG1     | Hydroxymethylglutaryl-CoA reductase                                                                            | 15921638  | 459  | Crenarchaeota | Sulfolobus tokodaii str. 7          |
| Acd1_0759  | C1 | arCOG00770 | E | GlyA     | Glycine/serine hydroxymethyltransferase                                                                        | 37463630  | 174  | Crenarchaeota | Metallosphaera yellowstonensis MK1  |
| Acd1_0760  | C1 | arCOG02053 | T | UspA     | Nucleotide-binding protein, UspA family                                                                        | 15921640  | 249  | Crenarchaeota | Sulfolobus tokodaii str. 7          |
| Acd1_0761  | C1 | arCOG0493  | G | GapA     | Glyceraldhyde-3-phosphate dehydrogenase/erythrose-4-phosphate dehydrogenase                                    | 15921641  | 127  | Crenarchaeota | Sulfolobus tokodaii str. 7          |
| Acd1_0762  | C1 | arCOG0496  | G | Pgk      | 3-phosphoglycerate kinase                                                                                      | 146304417 | 31.6 | Crenarchaeota | Metallosphaera sedula DSM 5348      |
| Acd1_0763  | C1 | arCOG05981 | S | -        | Uncharacterized conserved protein                                                                              | 15921633  | 274  | Crenarchaeota | Sulfolobus tokodaii str. 7          |
| HRNAGinTTG |    |            |   |          | HRNAGinTTG                                                                                                     | 15921634  | 35.4 | Crenarchaeota | Sulfolobus tokodaii str. 7          |
| HRNAGinCTG |    |            |   |          | HRNAGinCTG                                                                                                     | 15921633  | 274  | Crenarchaeota | Sulfolobus tokodaii str. 7          |
| HRNAThrCGT |    |            |   |          | HRNAThrCGT                                                                                                     | 15921634  | 35.4 | Crenarchaeota | Sulfolobus tokodaii str. 7          |
| Acd1_0764  | C1 | arCOG03846 | V | -        | Predicted antitoxin, copG family                                                                               | 284175617 | 932  | Crenarchaeota | Sulfolobus solfataricus 98/2        |
| Acd1_0765  | C1 | arCOG01715 | O | suFB     | Cysteine desulfurase activator SuFB                                                                            | 330834435 | 261  | Crenarchaeota | Metallosphaera cuprina Ar-4         |
| Acd1_0766  | C1 | arCOG01715 | O | suFB     | Cysteine desulfurase activator SuFB                                                                            | 15921463  | 468  | Crenarchaeota | Sulfolobus tokodaii str. 7          |
| Acd1_0767  | C1 | -          | S | -        | Uncharacterized protein                                                                                        | 332797001 | 213  | Crenarchaeota | Acidithiobacillus walsbyi           |
| Acd1_0768  | C1 | arCOG00318 | H | PhoU     | Phosphate uptake regulator                                                                                     | 332797003 | 580  | Crenarchaeota | Acidithiobacillus walsbyi           |
| Acd1_0769  | C1 | arCOG01840 | O | IbpA     | Molecular chaperone (HSP20 family)                                                                             | 15921466  | 224  | Crenarchaeota | Sulfolobus tokodaii str. 7          |
| Acd1_0770  | C1 | arCOG00347 | R | -        | Archaean enzyme of ATP-grasp superfamily                                                                       | 332797005 | 110  | Crenarchaeota | Acidithiobacillus walsbyi           |
| Acd1_0771  | C1 | arCOG01303 | E | GcvH     | Glycine cleavage system H protein (lipoate-binding)                                                            | 332797006 | 33.5 | Crenarchaeota | Acidithiobacillus walsbyi           |
| Acd1_0772  | C1 | arCOG00756 | E | GcvT     | Glycine cleavage system T protein (aminomethyltransferase)                                                     | 332797007 | 132  | Crenarchaeota | Acidithiobacillus walsbyi           |
| Acd1_0773  | C1 | arCOG00077 | E | GcvP     | Glycine cleavage system P (pyridoxal-binding), N-terminal domain                                               | 332797010 | 170  | Crenarchaeota | Acidithiobacillus walsbyi           |
| Acd1_0774  | C1 | arCOG00076 | E | GcvP     | Glycine cleavage system P (pyridoxal-binding), C-terminal domain                                               | 332797009 | 184  | Crenarchaeota | Acidithiobacillus walsbyi           |
| Acd1_0775  | C1 | arCOG01739 | U | LepB     | Signal peptidase I                                                                                             | 70607136  | 449  | Crenarchaeota | Sulfolobus acidocaldarius DSM 639   |
| Acd1_0776  | C1 | arCOG04323 | S | -        | Zn-finger protein                                                                                              | 15921473  | 350  | Crenarchaeota | Sulfolobus tokodaii str. 7          |
| Acd1_0777  | C1 | -          | S | -        | Uncharacterized protein                                                                                        | 14602152  | 188  | Crenarchaeota | Aeropyrum pernix K1                 |
| Acd1_0778  | C1 | arCOG01169 | G | Eno      | Enolase                                                                                                        | 332797012 | 270  | Crenarchaeota | Acidithiobacillus walsbyi           |
| Acd1_0779  | C1 | arCOG04858 | D | -        | Uncharacterized conserved protein                                                                              | 342306399 | 185  | Crenarchaeota | Sulfolobus tokodaii str. 7          |
| Acd1_0780  | C1 | arCOG04054 | R | -        | Potential cell division protein, a component of ESCRT system                                                   | 15897798  | 1177 | Crenarchaeota | Sulfolobus solfataricus P2          |
| Acd1_0781  | C1 | arCOG04053 | D | ESCRTIII | Crenarchaeal division protein ESCRT-III                                                                        | 146304434 | 164  | Crenarchaeota | Metallosphaera sedula DSM 5348      |
| Acd1_0782  | C1 | arCOG01307 | D | Vps4     | Cell division ATPase of the AAA+ class, ESCRT system component                                                 | 15897796  | 102  | Crenarchaeota | Sulfolobus solfataricus P2          |
| Acd1_0783  | C1 | arCOG01527 | L | TopA     | Topoisomerase IA                                                                                               | 15921479  | 203  | Crenarchaeota | Sulfolobus tokodaii str. 7          |
| Acd1_0784  | C1 | arCOG01268 | R | RozQ     | DNA-directed RNA polymerase, subunit K/Omega                                                                   | 15921480  | 1387 | Crenarchaeota | Sulfolobus tokodaii str. 7          |
| Acd1_0785  | C1 | arCOG00082 | E | -        | Serine-pyruvate aminotransferase/archaeal aspartate aminotransferase                                           | 15921481  | 208  | Crenarchaeota | Sulfolobus tokodaii str. 7          |
| Acd1_0786  | C1 | arCOG01754 | H | SerA     | Phosphoglycerate dehydrogenase or related dehydrogenase                                                        | 70607125  | 85.1 | Crenarchaeota | Sulfolobus acidocaldarius DSM 639   |
| Acd1_0787  | C1 | arCOG04357 | L | -        | Thermotable 8-oxoguanine DNA glycosylase                                                                       | 70607124  | 138  | Crenarchaeota | Sulfolobus acidocaldarius DSM 639   |
| Acd1_0788  | C1 | arCOG02219 | S | -        | Uncharacterized conserved protein                                                                              | 342306399 | 186  | Crenarchaeota | Sulfolobus tokodaii str. 7          |
| Acd1_0789  | C1 | arCOG01633 | S | -        | Uncharacterized conserved protein                                                                              | 229579105 | 192  | Crenarchaeota | Sulfolobus islandicus V.G.57.14     |
| Acd1_0790  | C1 | arCOG08333 | S | -        | Uncharacterized conserved protein                                                                              | 70607184  | 263  | Crenarchaeota | Sulfolobus acidocaldarius DSM 639   |
| Acd1_0791  | C1 | arCOG04062 | S | -        | Uncharacterized conserved protein                                                                              | 15921487  | 58.9 | Crenarchaeota | Sulfolobus tokodaii str. 7          |
| Acd1_0792  | C1 | arCOG00570 | C | FixC     | Dehydrogenase (flavoprotein)                                                                                   | 161751094 | 368  | Crenarchaeota | Sulfolobus tokodaii str. 7          |
| Acd1_0793  | C1 | arCOG00808 | J | VaiS     | VaiH-RNA synthetase                                                                                            | 15921489  | 45.1 | Crenarchaeota | Sulfolobus tokodaii str. 7          |
| Acd1_0794  | C1 | arCOG01130 | E | -        | Aspartate/tyrosine/aromatic amino transferase                                                                  | 37463692  | 121  | Crenarchaeota | Sulfolobus tokodaii str. 7          |
| Acd1_0795  | C1 | arCOG01082 | E | TrpC     | Indole-3-glycerol phosphate synthase                                                                           | 70607179  | 491  | Crenarchaeota | Metallosphaera yellowstonensis MK1  |
| Acd1_0796  | C1 | arCOG00086 | E | PabA     | Anthraniolate/para-aminobenzoate synthase component II                                                         | 70607178  | 121  | Crenarchaeota | Sulfolobus acidocaldarius DSM 639   |
| Acd1_0797  | C1 | arCOG02014 | E | TrpE     | Anthraniolate/para-aminobenzoate synthase component I                                                          | 70607178  | 157  | Crenarchaeota | Sulfolobus acidocaldarius DSM 639   |
| Acd1_0798  | C1 | arCOG01983 | E | TrpF     | Phosphoribosylanthranilate isomerase                                                                           | 342306402 | 623  | Crenarchaeota | Sulfolobus tokodaii str. 7          |
| Acd1_0799  | C1 | arCOG02012 | E | TrpD     | Anthraniolate phosphoribosyltransferase                                                                        | 15897778  | 940  | Crenarchaeota | Sulfolobus solfataricus P2          |
| Acd1_0800  | C1 | arCOG01086 | R | TrpA     | Tryptophan synthase alpha chain                                                                                | 15921495  | 306  | Crenarchaeota | Sulfolobus tokodaii str. 7          |
| Acd1_0801  | C1 | arCOG01432 | R | -        | Tryptophan synthase beta-subunit                                                                               | 15921496  | 65.1 | Crenarchaeota | Sulfolobus tokodaii str. 7          |
| Acd1_0802  | C1 | arCOG01674 | C | AcyP     | Acylphosphatase                                                                                                | 15897775  | 274  | Crenarchaeota | Sulfolobus solfataricus P2          |
| Acd1_0803  | C1 | arCOG04213 | I | INO1     | Myo-inositol-1-phosphate synthase                                                                              | 15921498  | 592  | Crenarchaeota | Sulfolobus tokodaii str. 7          |
| Acd1_0804  | C1 | arCOG01111 | G | PpsA     | Phosphoenolpyruvate synthase/pyruvate phosphate dikinase                                                       | 342306404 | 179  | Crenarchaeota | Sulfolobus tokodaii str. 7          |
| Acd1_0805  | C1 | arCOG00452 | D | ESCRTIII | Crenarchaeal division protein ESCRT-III                                                                        | 15921500  | 173  | Crenarchaeota | Sulfolobus tokodaii str. 7          |
| Acd1_0806  | C1 | arCOG07220 | S | -        | Uncharacterized conserved protein                                                                              | 332797041 | 174  | Crenarchaeota | Acidithiobacillus walsbyi           |
| Acd1_0807  | C1 | arCOG01434 | E | ThrC     | Threonine synthase and cysteine synthase                                                                       | 70607166  | 184  | Crenarchaeota | Sulfolobus acidocaldarius DSM 639   |
| Acd1_0808  | C1 | arCOG00861 | E | LysC     | Aspartokinase                                                                                                  | 70607165  | 490  | Crenarchaeota | Sulfolobus acidocaldarius DSM 639   |
| Acd1_0809  | C1 | arCOG04094 | E | Asd      | Aspartate-semialdehyde dehydrogenase                                                                           | 15921505  | 207  | Crenarchaeota | Sulfolobus tokodaii str. 7          |
| Acd1_0810  | C1 | arCOG03032 | R | -        | Metal-dependent phosphoesterase (PHP family)                                                                   | 330834389 | 32   | Crenarchaeota | Metallosphaera cuprina Ar-4         |
| Acd1_0811  | C1 | arCOG02469 | S | -        | Protein, predicted to be involved in DNA repair                                                                | 15921507  | 63.2 | Crenarchaeota | Sulfolobus tokodaii str. 7          |
| Acd1_0812  | C1 | arCOG00912 | E | ArgF     | Ornithine carbamoyltransferase                                                                                 | 332797048 | 244  | Crenarchaeota | Acidithiobacillus walsbyi           |
| Acd1_0813  | C1 | arCOG02103 | K | -        | Transcriptional regulator, contains WHH domain                                                                 | 15921509  | 193  | Crenarchaeota | Sulfolobus tokodaii str. 7          |
| Acd1_0814  | C1 | arCOG01350 | R | -        | Predicted inorganic polyphosphate/ATP-NAD kinase                                                               | 227827619 | 923  | Crenarchaeota | Sulfolobus islandicus M.14.25       |
| Acd1_0815  | C1 | arCOG04268 | L | Cdt1     | Replication initiator protein WhpI or Cdt1-like protein, contains HTH domain                                   | 146304469 | 71.6 | Crenarchaeota | Metallosphaera sedula DSM 5348      |
| Acd1_0816  | C1 | arCOG04266 | S | -        | Uncharacterized conserved protein                                                                              | 15921512  | 520  | Crenarchaeota | Sulfolobus tokodaii str. 7          |
| Acd1_0817  | C1 | arCOG01460 | S | -        | Uncharacterized conserved protein                                                                              | 15921513  | 140  | Crenarchaeota | Sulfolobus tokodaii str. 7          |
| Acd1_0818  | C1 | arCOG05984 | S | -        | Uncharacterized conserved protein                                                                              | 15921514  | 155  | Crenarchaeota | Sulfolobus tokodaii str. 7          |
| Acd1_0819  | C1 | arCOG01257 | O | GroL     | Chaperonin GroEL (HSP60 family)                                                                                | 15921515  | 322  | Crenarchaeota | Sulfolobus tokodaii str. 7          |
| Acd1_0820  | C1 | arCOG00569 | F | -        | Uncharacterized conserved protein                                                                              | 332797056 | 120  | Crenarchaeota | Acidithiobacillus walsbyi           |
| Acd1_0821  | C1 | arCOG03879 | J | -        | Predicted transcriptional regulator                                                                            | 70607152  | 796  | Crenarchaeota | Sulfolobus acidocaldarius DSM 639</ |

|              |    |            |   |        |                                                                                                                                                    |           |      |                         |                                             |
|--------------|----|------------|---|--------|----------------------------------------------------------------------------------------------------------------------------------------------------|-----------|------|-------------------------|---------------------------------------------|
| Acd1_0842    | C1 | arCOG01150 | R | -      | Predicted ICC-like phosphoesterase                                                                                                                 | 15921540  | 332  | Crenarchaeota           | Sulfolobus tokodaii str. 7                  |
| Acd1_0843    | C1 | arCOG04161 | J | DPH5   | Diphthamide biosynthesis methyltransferase                                                                                                         | 332797081 | 154  | Crenarchaeota           | Acidianus hospitalis W1                     |
| Acd1_0844    | C1 | arCOG01224 | M | TadA   | Cydylyltransferase fused to conserved domain of DUF357 family                                                                                      | 15921542  | 269  | Crenarchaeota           | Sulfolobus tokodaii str. 7                  |
| Acd1_0845    | C1 | arCOG01904 | H | -      | CTP-dependent Riboflavin kinase                                                                                                                    | 33054254  | 85.9 | Crenarchaeota           | Metallosphaera cuprina Ar-4                 |
| Acd1_0846    | C1 | arCOG04174 | J | TW3    | Wybutosine (YW) biosynthesis enzyme, Fe-S oxidoreductase                                                                                           | 15897835  | 519  | Crenarchaeota           | Sulfolobus solfataricus P2                  |
| Acd1_0847    | C1 | arCOG01717 | J | GatA   | Asp-tRNAAsn/Glu-tRNAArgin amidotransferase A subunit or related amidase                                                                            | 15921546  | 196  | Crenarchaeota           | Sulfolobus tokodaii str. 7                  |
| Acd1_0848    | C1 | arCOG02726 | J | GatC   | Asp-tRNAAsn/Glu-tRNAArgin amidotransferase C subunit                                                                                               | 15921548  | 137  | Crenarchaeota           | Sulfolobus tokodaii str. 7                  |
| Acd1_0849    | C1 | arCOG04231 | P | GutA   | Uncharacterized protein involved in tolerance to divalent cations                                                                                  | 163784194 | 30.8 | Aquificae               | Hydrogenivirga sp. 129-5-R3-1               |
| Acd1_0850    | C1 | arCOG07217 | S | -      | Uncharacterized conserved protein                                                                                                                  | 227827540 | 38.1 | Crenarchaeota           | Sulfolobus islandicus M.14.25               |
| Acd1_0851    | C1 | arCOG08074 | K | xpb    | sDNA-dependent ATPase, helicase superfamily II                                                                                                     | 15921551  | 294  | Crenarchaeota           | Sulfolobus tokodaii str. 7                  |
| Acd1_0852    | C1 | arCOG05979 | S | -      | Uncharacterized conserved protein                                                                                                                  | 70607083  | 189  | Crenarchaeota           | Sulfolobus acidocaldarius DSM 639           |
| Acd1_0853    | C1 | arCOG07216 | S | -      | Uncharacterized conserved protein                                                                                                                  | 374633752 | 115  | Crenarchaeota           | Metallosphaera yellowstonensis MK1          |
| Acd1_0854    | C1 | arCOG04324 | S | -      | Uncharacterized conserved protein                                                                                                                  | 70607081  | 288  | Crenarchaeota           | Sulfolobus acidocaldarius DSM 639           |
| Acd1_0855    | C1 | arCOG01753 | K | Ssh10b | Archaeal DNA-binding protein                                                                                                                       | 15921554  | 270  | Crenarchaeota           | Sulfolobus tokodaii str. 7                  |
| Acd1_0856    | C1 | arCOG01536 | L | -      | Reverse gyrase                                                                                                                                     | 332797094 | 62   | Crenarchaeota           | Acidianus hospitalis W1                     |
| Acd1_0857    | C1 | arCOG01753 | K | Ssh10b | Archaeal DNA-binding protein                                                                                                                       | 227827533 | 236  | Crenarchaeota           | Sulfolobus islandicus M.14.25               |
| Acd1_0858    | C1 | arCOG00557 | R | Lhr    | Lhr-like helicase                                                                                                                                  | 15921557  | 169  | Crenarchaeota           | Sulfolobus tokodaii str. 7                  |
| Acd1_0859    | C1 | arCOG04135 | R | -      | Zn-finger protein                                                                                                                                  | 332797097 | 439  | Crenarchaeota           | Acidianus hospitalis W1                     |
| Acd1_0860    | C1 | arCOG04246 | J | RtcB   | RNA 3'-P ligase, RtcB family protein                                                                                                               | 15921558  | 424  | Crenarchaeota           | Sulfolobus tokodaii str. 7                  |
| Acd1_0861    | C1 | arCOG04142 | Q | DYS1   | Deoxyphosphinase synthase                                                                                                                          | 70607075  | 444  | Crenarchaeota           | Sulfolobus acidocaldarius DSM 639           |
| Acd1_0862    | C1 | arCOG01165 | L | -      | DNA topoisomerase VI, subunit B                                                                                                                    | 70607074  | 366  | Crenarchaeota           | Sulfolobus acidocaldarius DSM 639           |
| Acd1_0863    | C1 | arCOG04143 | L | -      | DNA topoisomerase VI, subunit A                                                                                                                    | 70607073  | 163  | Crenarchaeota           | Sulfolobus acidocaldarius DSM 639           |
| Acd1_0864    | C1 | arCOG08093 | S | -      | Zn zipper protein                                                                                                                                  | 332797102 | 649  | Crenarchaeota           | Acidianus hospitalis W1                     |
| Acd1_0865    | C1 | arCOG04277 | J | Efp    | Translational elongation factor P (EF-P)/translational initiation factor 5A (eIF-5A)                                                               | 332797103 | 198  | Crenarchaeota           | Acidianus hospitalis W1                     |
| Acd1_0866    | C1 | arCOG01228 | U | Ffh    | Signal recognition particle (SRP)                                                                                                                  | 70607071  | 893  | Crenarchaeota           | Sulfolobus acidocaldarius DSM 639           |
| Acd1_0867    | C1 | arCOG01015 | J | -      | Predicted pseudouridylylase synthase                                                                                                               | 342306425 | 387  | Crenarchaeota           | Sulfolobus tokodaii str. 7                  |
| Acd1_0868    | C1 | arCOG01260 | I | FabG   | Short-chain alcohol dehydrogenase                                                                                                                  | 227827522 | 426  | Crenarchaeota           | Sulfolobus islandicus M.14.25               |
| Acd1_0869    | C1 | arCOG04114 | L | -      | Chromatin protein Cren7                                                                                                                            | 15897854  | 373  | Crenarchaeota           | Sulfolobus solfataricus P2                  |
| Acd1_0870    | C1 | arCOG00858 | F | PyrH   | Uridylate kinase                                                                                                                                   | 15897855  | 163  | Crenarchaeota           | Sulfolobus solfataricus P2                  |
| Acd1_0871    | C1 | arCOG07215 | F | -      | Uncharacterized conserved protein                                                                                                                  | 332797111 | 154  | Acidianus hospitalis W1 | Acidianus hospitalis W1                     |
| Acd1_0872    | C1 | arCOG02092 | E | LeuA   | Isopropylmalate/homocitrate/citramalate synthase                                                                                                   | 146304528 | 378  | Crenarchaeota           | Metallosphaera sedula DSM 5348              |
| RNALeuTAA    | C1 | arCOG01122 | G | RplA   | Ribosome 5-phosphate isomerase                                                                                                                     | 15897858  | 182  | Crenarchaeota           | Sulfolobus solfataricus P2                  |
| 16s SSU rRNA | C1 | arCOG00312 | Q | AhpC   | Peroxiredoxin                                                                                                                                      | 302348384 | 334  | Crenarchaeota           | Acidilobus saccharovorans 345-15            |
| 23s LSU rRNA | C1 | arCOG01475 | Q | PncA   | Amidase related to nicotinamidase                                                                                                                  | 307596537 | 681  | Crenarchaeota           | Vulcanisaeta distributa DSM 14429           |
| Acd1_0874    | C1 | arCOG00312 | Q | AhpC   | Peroxiredoxin                                                                                                                                      | 302348384 | 334  | Crenarchaeota           | Acidilobus saccharovorans 345-15            |
| Acd1_0875    | C1 | arCOG01475 | Q | PncA   | Amidase related to nicotinamidase                                                                                                                  | 307596537 | 681  | Crenarchaeota           | Vulcanisaeta distributa DSM 14429           |
| Acd1_0876    | C1 | arCOG01521 | Q | -      | Phytoene dehydrogenase or related enzyme                                                                                                           | 70607009  | 197  | Crenarchaeota           | Sulfolobus acidocaldarius DSM 639           |
| Acd1_0877    | C1 | arCOG00777 | I | Paal   | HGG motif-containing thioesterase, possibly involved in aromatic compounds catabolism                                                              | 332795875 | 226  | Crenarchaeota           | Acidianus hospitalis W1                     |
| Acd1_0878    | C1 | arCOG02937 | I | MVD1   | Methylglutaryl pyrophosphate decarboxylase                                                                                                         | 342306245 | 166  | Crenarchaeota           | Sulfolobus tokodaii str. 7                  |
| Acd1_0879    | C1 | arCOG01032 | I | ERG8   | Phosphoenolpyruvate kinase                                                                                                                         | 15921220  | 34.7 | Crenarchaeota           | Sulfolobus tokodaii str. 7                  |
| Acd1_0880    | C1 | arCOG01619 | R | ARA1   | Aldo/keto reductase, related to diketoglucuronate reductase                                                                                        | 146303237 | 55.1 | Crenarchaeota           | Metallosphaera sedula DSM 5348              |
| Acd1_0881    | C1 | arCOG05974 | S | -      | Uncharacterized conserved protein                                                                                                                  | 229585838 | 440  | Crenarchaeota           | Sulfolobus islandicus M.16.27               |
| Acd1_0882    | C1 | arCOG01055 | K | -      | Predicted transcriptional regulator                                                                                                                | 15921222  | 288  | Crenarchaeota           | Sulfolobus tokodaii str. 7                  |
| Acd1_0883    | C1 | arCOG01055 | K | -      | Uncharacterized protein                                                                                                                            | 15921222  | 288  | Crenarchaeota           | Sulfolobus tokodaii str. 7                  |
| Acd1_0884    | C1 | arCOG05895 | S | -      | Uncharacterized conserved protein                                                                                                                  | 159221297 | 58.5 | Crenarchaeota           | Sulfolobus tokodaii str. 7                  |
| Acd1_0885    | C1 | arCOG04227 | R | -      | Predicted CoA-binding protein                                                                                                                      | 15920295  | 618  | Crenarchaeota           | Sulfolobus tokodaii str. 7                  |
| Acd1_0886    | C1 | arCOG02242 | K | -      | Transcriptional regulator, contains HTH domain                                                                                                     | 15921223  | 140  | Crenarchaeota           | Sulfolobus tokodaii str. 7                  |
| Acd1_0887    | C1 | arCOG00968 | R | -      | Alpha/beta-knot SAM-dependent RNA methyltransferase                                                                                                | 156937971 | 223  | Crenarchaeota           | Ignicoccus hospitalis KINA/I                |
| Acd1_0888    | C1 | arCOG04430 | R | -      | HD superfamily phosphohydrolase                                                                                                                    | 15921218  | 569  | Crenarchaeota           | Sulfolobus tokodaii str. 7                  |
| Acd1_0889    | C1 | arCOG01315 | F | Udp    | Uridine phosphorylase                                                                                                                              | 15921217  | 406  | Crenarchaeota           | Sulfolobus tokodaii str. 7                  |
| Acd1_0890    | C1 | arCOG08212 | S | -      | Uncharacterized conserved protein                                                                                                                  | 332797167 | 127  | Crenarchaeota           | Acidianus hospitalis W1                     |
| Acd1_0891    | C1 | arCOG01065 | R | HcaD   | NAD(FAD)-dependent dehydrogenase                                                                                                                   | 330834931 | 55.8 | Crenarchaeota           | Metallosphaera cuprina Ar-4                 |
| Acd1_0892    | C1 | arCOG00940 | R | -      | Radical SAM superfamily enzyme                                                                                                                     | 146303294 | 506  | Crenarchaeota           | Metallosphaera sedula DSM 5348              |
| Acd1_0893    | C1 | arCOG00504 | R | GlobB  | Metal-dependent hydrolase of the beta-lactamase superfamily II                                                                                     | 346323242 | 209  | Crenarchaeota           | Metallosphaera yellowstonensis MK1          |
| Acd1_0894    | C1 | arCOG03202 | O | -      | Collagenase family protease                                                                                                                        | 332797312 | 43.9 | Crenarchaeota           | Acidianus hospitalis W1                     |
| HNAThRGt     | C1 | arCOG02062 | O | SirA   | HGG motif-containing thioesterase, possibly involved in aromatic compounds catabolism                                                              | 15899355  | 72   | Crenarchaeota           | Sulfolobus solfataricus P2                  |
| Acd1_0895    | C1 | arCOG01064 | R | HcaD   | NAD(FAD)-dependent dehydrogenase                                                                                                                   | 227831644 | 452  | Crenarchaeota           | Sulfolobus islandicus L.S.2.15              |
| Acd1_0896    | C1 | arCOG01064 | R | HcaD   | NAD(FAD)-dependent dehydrogenase                                                                                                                   | 227831644 | 452  | Crenarchaeota           | Sulfolobus islandicus L.S.2.15              |
| Acd1_0897    | C1 | arCOG02114 | S | -      | Uncharacterized conserved protein                                                                                                                  | 284999195 | 651  | Crenarchaeota           | Sulfolobus islandicus L.D.8.5               |
| IRNAGYCC     | C1 | arCOG03674 | E | -      | IRNAGYCC                                                                                                                                           | 332795700 | 121  | Crenarchaeota           | Acidianus hospitalis W1                     |
| Acd1_0898    | C1 | arCOG03674 | E | -      | Thermoperyn-like protease                                                                                                                          | 332795700 | 121  | Crenarchaeota           | Acidianus hospitalis W1                     |
| Acd1_0899    | C1 | arCOG04761 | I | UppP   | Undecaprenyl pyrophosphate phosphatase                                                                                                             | 347631172 | 559  | Crenarchaeota           | Metallosphaera yellowstonensis MK1          |
| Acd1_0900    | C1 | -          | - | -      | Uncharacterized protein                                                                                                                            | 255513851 | 320  | Euryarchaeota           | Candidatus Micrarchaeum acidiphilum ARMAN-2 |
| Acd1_0901    | C1 | arCOG07213 | S | 0      | Uncharacterized conserved protein                                                                                                                  | 70607059  | 483  | Crenarchaeota           | Sulfolobus acidocaldarius DSM 639           |
| Acd1_0902    | C1 | arCOG01263 | R | DltE   | Short-chain dehydrogenase                                                                                                                          | 332796939 | 66.2 | Crenarchaeota           | Acidianus hospitalis W1                     |
| Acd1_0903    | C1 | arCOG00164 | S | CysJ   | ABC-type sulfate transport system, permease component                                                                                              | 374633265 | 118  | Crenarchaeota           | Metallosphaera yellowstonensis MK1          |
| Acd1_0904    | C1 | arCOG07536 | S | -      | Secreted protein, containing kelch and fibronectin type 3 domains                                                                                  | 159212172 | 148  | Crenarchaeota           | Sulfolobus tokodaii str. 7                  |
| IRNAProGGG   | C1 | arCOG01182 | T | -      | IRNAProGGG                                                                                                                                         | 15921189  | 85.1 | Crenarchaeota           | Sulfolobus tokodaii str. 7                  |
| Acd1_0905    | C1 | arCOG04249 | J | CCA1   | tRNA nucleotidyltransferase (CCA-adding enzyme)                                                                                                    | 15921188  | 318  | Crenarchaeota           | Sulfolobus tokodaii str. 7                  |
| Acd1_0906    | C1 | arCOG03736 | J | LigT   | 2'-5' RNA ligase                                                                                                                                   | 342306332 | 385  | Crenarchaeota           | Sulfolobus tokodaii str. 7                  |
| Acd1_0907    | C1 | arCOG01045 | H | CoaE   | Coenzyme-CoA kinase                                                                                                                                | 15921186  | 486  | Crenarchaeota           | Sulfolobus tokodaii str. 7                  |
| Acd1_0908    | C1 | arCOG01043 | R | -      | Predicted RNA binding protein with dsRBD fold                                                                                                      | 15921185  | 1234 | Crenarchaeota           | Sulfolobus tokodaii str. 7                  |
| Acd1_0909    | C1 | arCOG05051 | R | ElaC   | Metal-dependent hydrolase of the beta-lactamase superfamily                                                                                        | 15921184  | 452  | Crenarchaeota           | Sulfolobus tokodaii str. 7                  |
| Acd1_0910    | C1 | arCOG00047 | F | -      | Predicted DNA modification methylase                                                                                                               | 374633803 | 35   | Crenarchaeota           | Metallosphaera yellowstonensis MK1          |
| Acd1_0911    | C1 | arCOG00067 | F | PrsA   | Phosphoribosylpyrophosphate synthetase                                                                                                             | 70607047  | 167  | Crenarchaeota           | Sulfolobus acidocaldarius DSM 639           |
| Acd1_0912    | C1 | arCOG01225 | R | MVD1   | GTPase SRA1 or related small G protein                                                                                                             | 332796927 | 400  | Crenarchaeota           | Acidianus hospitalis W1                     |
| Acd1_0913    | C1 | arCOG04088 | L | DnaN   | DNA polymerase sliding clamp subunit (PCNA homolog)                                                                                                | 15921180  | 534  | Crenarchaeota           | Sulfolobus tokodaii str. 7                  |
| Acd1_0914    | C1 | arCOG04110 | L | PR1    | Eukaryotic-type DNA primase, catalytic (small) subunit                                                                                             | 15921179  | 94   | Crenarchaeota           | Sulfolobus tokodaii str. 7                  |
| Acd1_0915    | C1 | arCOG00551 | L | -      | DNA replication initiation complex subunit, GIN515 family                                                                                          | 15921178  | 258  | Crenarchaeota           | Sulfolobus tokodaii str. 7                  |
| Acd1_0916    | C1 | arCOG04109 | J | RPL42A | Ribosomal protein L4E                                                                                                                              | 15921177  | 201  | Crenarchaeota           | Sulfolobus tokodaii str. 7                  |
| Acd1_0917    | C1 | arCOG04108 | J | RPS27A | Ribosomal protein S27                                                                                                                              | 15921176  | 643  | Crenarchaeota           | Sulfolobus tokodaii str. 7                  |
| Acd1_0918    | C1 | arCOG04107 | J | SUI2   | Translation initiation factor 2, alpha subunit (eIF-2alpha)                                                                                        | 332796933 | 384  | Crenarchaeota           | Acidianus hospitalis W1                     |
| Acd1_0919    | C1 | arCOG00906 | J | -      | Predicted Zn-ribbon RNA-binding protein                                                                                                            | 15921174  | 263  | Crenarchaeota           | Sulfolobus tokodaii str. 7                  |
| Acd1_0920    | C1 | arCOG02044 | R | -      | Uncharacterized membrane protein, required for N-linked glycosylation                                                                              | 15921173  | 207  | Crenarchaeota           | Sulfolobus tokodaii str. 7                  |
| IRNAlleGAT   | C1 | arCOG01043 | S | -      | IRNAlleGAT                                                                                                                                         | 284175516 | 221  | Crenarchaeota           | Sulfolobus solfataricus 98/2                |
| IRNAlleTGC   | C1 | arCOG01043 | S | -      | IRNAlleTGC                                                                                                                                         | 284175516 | 221  | Crenarchaeota           | Sulfolobus solfataricus 98/2                |
| Acd1_0922    | C1 | arCOG10437 | S | -      | Uncharacterized conserved protein                                                                                                                  | 284175516 | 221  | Crenarchaeota           | Sulfolobus solfataricus 98/2                |
| Acd1_0923    | C1 | arCOG06663 | M | GCD1   | Nucleoside-diphosphate-sugar pyrophosphorylase involved in lipopolysaccharide biosynthesis/translation initiation factor 2B, gamma/epsilon subunit | 15921209  | 534  | Crenarchaeota           | Sulfolobus tokodaii str. 7                  |
| IRNAProCGG   | C1 | arCOG07210 | S | -      | IRNAProCGG                                                                                                                                         | 70607034  | 134  | Crenarchaeota           | Sulfolobus tokodaii str. 7                  |
| Acd1_0924    | C1 | arCOG01330 | C | SucD   | Uncharacterized conserved protein                                                                                                                  | 374633561 | 71.2 | Crenarchaeota           | Sulfolobus acidocaldarius DSM 639           |
| Acd1_0925    | C1 | arCOG01339 | C | SucD   | Succinyl-CoA synthetase, alpha subunit                                                                                                             | 332797165 | 187  | Crenarchaeota           | Metallosphaera yellowstonensis MK1          |
| Acd1_0926    | C1 | arCOG01337 | C | SucC   | Succinyl-CoA synthetase, beta subunit                                                                                                              | 15921205  | 263  | Crenarchaeota           | Acidianus hospitalis W1                     |
| Acd1_0927    | C1 | arCOG00461 | L | -      | Uncharacterized protein related to Endonuclease III                                                                                                | 15921206  | 64.3 | Crenarchaeota           | Sulfolobus tokodaii str. 7                  |
| Acd1_0928    | C1 | arCOG01394 | M | MurG   | UDP-N-acetylglucosamine:PS N-acetylglucosamine transferase                                                                                         | 15921207  | 102  | Crenarchaeota           | Sulfolobus tokodaii str. 7                  |
| Acd1_0929    | C1 | arCOG00401 | J | ThrS   | Threonyl-tRNA synthetase                                                                                                                           | 70607028  | 102  | Crenarchaeota           | Sulfolobus tokodaii str. 7                  |
| Acd1_0930    | C1 | arCOG02724 | L | Ada    | Methylated DNA-protein cysteine methyltransferase                                                                                                  | 70607028  | 102  | Crenarchaeota           | Sulfolobus acidocaldarius DSM 639           |
| IRNAlleCGC   | C1 | arCOG01755 | C | LdhA   | Lactate dehydrogenase or related 2-hydroxyacid dehydrogenase                                                                                       | 374632850 | 643  | Crenarchaeota           | Metallosphaera yellowstonensis MK1          |
| Acd1_0931    | C1 | arCOG01755 | C | LdhA   | Lactate dehydrogenase or related 2-hydroxyacid dehydrogenase                                                                                       | 374632850 | 643  | Crenarchaeota           | Metallosphaera yellowstonensis MK1          |
| Acd1_0932    | C1 | -          | - | -      | Uncharacterized protein                                                                                                                            | 146303289 | 241  | Crenarchaeota           | Metallosphaera sedula DSM 5348              |
| Acd1_0933    | C1 | arCOG06017 | S | -      | Uncharacterized conserved protein                                                                                                                  | 146303289 | 241  | Crenarchaeota           | Metallosphaera sedula DSM 5348              |
| Acd1_0934    | C1 | arCOG01018 | J | -      | Uncharacterized protein                                                                                                                            | 146303289 | 241  | Crenarchaeota           | Metallosphaera sedula DSM 5348              |
| Acd1_0935    | C1 | -          | - | -      | Uncharacterized protein                                                                                                                            | 146303289 | 241  | Crenarchaeota           | Metallosphaera sedula DSM 5348              |
| Acd1_0936    | C1 | -          | - | -      | Predicted ATPase                                                                                                                                   | 14601042  | 314  | Crenarchaeota           | Aeropyrum pernix K1                         |
| Acd1_0937    | C1 | -          | - | -      | Uncharacterized protein                                                                                                                            | 118431239 | 204  | Crenarchaeota           | Aeropyrum pernix K1                         |
| Acd1_0938    | C1 | -          | - | -      | Uncharacterized protein                                                                                                                            | 14601040  | 508  | Crenarchaeota           | Aeropyrum pernix K1                         |
| Acd1_0939    | C1 | arCOG00462 | S | MutY   | A/G-specific DNA glycosylase                                                                                                                       | 118431238 | 427  | Crenarchaeota           | Aeropyrum pernix K1                         |
| Acd1_0940    | C1 | arCOG06089 | S | -      | Uncharacterized conserved protein                                                                                                                  | 374632871 | 125  | Crenarchaeota           | Pyrobaculum sp. 1860                        |
| Acd1_0941    | C1 | arCOG06089 | S | -      | Uncharacterized conserved protein                                                                                                                  | 118431237 | 388  | Crenarchaeota           | Aeropyrum pernix K1                         |
| Acd1_0942    | C1 | arCOG04157 | L | Dcm    | Site-specific DNA methylase                                                                                                                        | 118431236 | 697  | Crenarchaeota           | Aeropyrum pernix K1                         |
| Acd1_0943    | C1 | arCOG01064 | R | HcaD   | NAD(FAD)-dependent dehydrogenase                                                                                                                   | 15922539  | 137  | Crenarchaeota           | Sulfolobus tokodaii str. 7                  |
| Acd1_0944    | C2 | arCOG00940 | R | -      | Radical SAM superfamily enzyme                                                                                                                     | 332797245 | 288  | Crenarchaeota           | Acidianus hospitalis W1                     |
| Acd1_0945    | C2 | arCOG01671 | H | LdhD   | 3-oxopropionyl-2-hydroxyisovalerate decarboxylase or related decarboxylase                                                                         | 307595548 | 248  | Crenarchaeota           | Vulcanisaeta distributa DSM 14429           |
| Acd1_0946    | C2 | arCOG03682 | R | SPS1   | Membrane associated serine/threonine protein kinase                                                                                                | 146303114 | 216  | Crenarchaeota           | Metallosphaera sedula DSM 5348              |
| Acd1_0947    | C2 | arCOG01397 | M | WcaA   | Glycosyltransferase                                                                                                                                | 284997381 | 41.2 | Crenarchaeota           | Sulfolobus islandicus L.D.8.5               |
| Acd1_0948    | C2 | arCOG01400 | Q | -      | SAM-dependent methyltransferase                                                                                                                    | 284997365 |      |                         |                                             |

|            |    |            |   |        |                                                                                                                |           |               |                                  |                                      |
|------------|----|------------|---|--------|----------------------------------------------------------------------------------------------------------------|-----------|---------------|----------------------------------|--------------------------------------|
| Acd1_0967  | C2 | arCOG02021 | P | PspE   | Rhodanese-related sulfurtransferase                                                                            | 15920833  | 96.7          | Crenarchaeota                    | Sulfolobus tokodaii str. 7           |
| Acd1_0968  | C2 | arCOG03672 | E |        | Thermopsis-like protease                                                                                       | 385772646 | 97.8          | Crenarchaeota                    | Sulfolobus islandicus HVE10/4        |
| Acd1_0969  | C2 | arCOG02316 | H | MoeA   | Molybdopterin biosynthesis enzyme                                                                              | 325968768 | 78.6          | Crenarchaeota                    | Vulcanisaeta moutoukvia 768-28       |
| Acd1_0970  | C2 | arCOG07313 | S |        | Uncharacterized conserved protein                                                                              | 374632223 | 277           | Crenarchaeota                    | Metallophsphaera yellowstonensis MK1 |
| Acd1_0971  | C2 | arCOG01578 | P | MgtA   | Cation transport ATPase                                                                                        | 346430357 | 296           | environmental samples            | uncultured archaeon                  |
| Acd1_0972  | C2 | arCOG01400 | Q |        | SAM-dependent methyltransferase                                                                                | 385772551 | 336           | Crenarchaeota                    | Sulfolobus islandicus HVE10/4        |
| Acd1_0973  | C2 | arCOG01252 | C | PutA   | Lactaldehyde dehydrogenase, Succinate semialdehyde dehydrogenase or other NAD-dependent aldehyde dehydrogenase | 15922809  | 147           | Crenarchaeota                    | Sulfolobus tokodaii str. 7           |
| Acd1_0974  | C2 | arCOG00651 | H | CblG   | Cobalamin biosynthesis protein CblG                                                                            | 374632905 | 46.6          | Crenarchaeota                    | Metallophsphaera yellowstonensis MK1 |
| Acd1_0975  | C2 | arCOG00650 | H | Cobl   | Precorrin-6B methylase 1                                                                                       | 374632904 | 776           | Crenarchaeota                    | Metallophsphaera yellowstonensis MK1 |
| Acd1_0976  | C2 | arCOG02246 | P | -      | Sirohydrochlorin ferrochelatase                                                                                | 374632903 | 270           | Crenarchaeota                    | Metallophsphaera yellowstonensis MK1 |
| Acd1_0977  | C2 | arCOG00647 | H | Cobl   | Precorrin-3B methylase                                                                                         | 374632902 | 599           | Crenarchaeota                    | Metallophsphaera yellowstonensis MK1 |
| Acd1_0978  | C2 | arCOG04383 | H | CblD   | Cobalamin biosynthesis protein CblD                                                                            | 374632901 | 181           | Crenarchaeota                    | Metallophsphaera yellowstonensis MK1 |
| Acd1_0979  | C2 | arCOG00977 | H | Cobl   | Precorrin-6B methylase 2                                                                                       | 374632900 | 85.5          | Crenarchaeota                    | Metallophsphaera yellowstonensis MK1 |
| Acd1_0980  | C2 | arCOG00648 | H | CobF   | Precorrin-2 methylase                                                                                          | 374632899 | 417           | Crenarchaeota                    | Metallophsphaera yellowstonensis MK1 |
| Acd1_0981  | C2 | arCOG00645 | H | CobM   | Precorrin-4 methylase                                                                                          | 374632898 | 117           | Crenarchaeota                    | Metallophsphaera yellowstonensis MK1 |
| Acd1_0982  | C2 | arCOG00009 | E | PotE   | Amino acid transporter                                                                                         | 374633400 | 258           | Crenarchaeota                    | Metallophsphaera yellowstonensis MK1 |
| IRNAHisGTG |    |            |   |        | IRNAHisGTG                                                                                                     |           |               |                                  |                                      |
| Acd1_0983  | C2 | arCOG01704 | H | Dfp    | Phosphopantothonylcysteine synthetase/decarboxylase                                                            | 15920445  | 130           | Crenarchaeota                    | Sulfolobus tokodaii str. 7           |
| Acd1_0984  | C2 | arCOG00853 | R | RimI   | Acetyltransferase (NAT) family                                                                                 | 15920446  | 42.4          | Crenarchaeota                    | Sulfolobus tokodaii str. 7           |
| Acd1_0985  | C2 | arCOG01145 | R | -      | Icc family phosphoesterase                                                                                     | 15920447  | 353           | Crenarchaeota                    | Sulfolobus tokodaii str. 7           |
| Acd1_0986  | C2 | arCOG04238 | H | CitG   | Triphosphoribosyl-dephospho-CoA synthetase                                                                     | 332796330 | 122           | Crenarchaeota                    | Acidinus hospitalis W1               |
| Acd1_0987  | C2 | arCOG01831 | R | -      | Predicted nucleotidyltransferase                                                                               | 70606295  | 51.6          | Crenarchaeota                    | Acidinus acidocaldarius DSM 639      |
| Acd1_0988  | C2 | arCOG04329 | C | -      | Predicted butyrate kinase                                                                                      | 332796328 | 140           | Crenarchaeota                    | Acidinus hospitalis W1               |
| Acd1_0989  | C2 | arCOG03765 | K | K      | CopG family transcriptional regulator                                                                          | 330835793 | 1211          | Crenarchaeota                    | Metallophsphaera cuprina Ar-4        |
| Acd1_0990  | C2 | arCOG03765 | S |        | Uncharacterized conserved membrane protein                                                                     | 124027863 | 267           | Crenarchaeota                    | Hyperthermus butylicus DSM 5456      |
| IRNAMetCAT |    |            |   |        | IRNAMetCAT                                                                                                     |           |               |                                  |                                      |
| IRNALysCTT |    |            |   |        | IRNALysCTT                                                                                                     |           |               |                                  |                                      |
| Acd1_0991  | C2 | arCOG00767 | G | (ManB) | Phosphomannomutase                                                                                             | 15920425  | 168           | Crenarchaeota                    | Sulfolobus tokodaii str. 7           |
| Acd1_0992  | C2 | arCOG04124 | S | -      | Uncharacterized conserved protein                                                                              | 332796282 | 345           | Crenarchaeota                    | Acidinus hospitalis W1               |
| Acd1_0993  | C2 | arCOG00412 | H | -      | Uncharacterized conserved protein                                                                              | 342306118 | 478           | Crenarchaeota                    | Sulfolobus tokodaii str. 7           |
| Acd1_0994  | C2 | arCOG04105 | S | -      | Uncharacterized conserved protein                                                                              | 15920422  | 260           | Crenarchaeota                    | Sulfolobus tokodaii str. 7           |
| Acd1_0995  | C2 | arCOG00053 | G | SghH   | 3-hexulose-6-phosphate synthase or related protein                                                             | 15920421  | 275           | Crenarchaeota                    | Sulfolobus tokodaii str. 7           |
| Acd1_0996  | C2 | arCOG00063 | F | PyrG   | CTP synthase (UTP-ammonia lyase)                                                                               | 161751103 | 110           | Crenarchaeota                    | Sulfolobus tokodaii str. 7           |
| Acd1_0997  | C2 | arCOG01679 | K | ArxR   | Transcriptional regulator containing HTH domain, ArxR family                                                   | 330835701 | 280           | Crenarchaeota                    | Metallophsphaera cuprina Ar-4        |
| Acd1_0998  | C2 | arCOG00998 | K | LSM1   | Small nuclear ribonucleoprotein (snRNP) homolog                                                                | 374632978 | 570           | Crenarchaeota                    | Metallophsphaera yellowstonensis MK1 |
| Acd1_0999  | C2 | arCOG01678 | E | MetK   | Archaeal S-adenosylmethionine synthetase                                                                       | 15920416  | 236           | Crenarchaeota                    | Sulfolobus tokodaii str. 7           |
| Acd1_1000  | C2 | arCOG04219 | R | -      | Possible nuclease of RNase H fold, RuvC/YgfF family                                                            | 70606590  | 143           | Crenarchaeota                    | Sulfolobus acidocaldarius DSM 639    |
| Acd1_1001  | C2 | arCOG01181 | T | -      | RIO-like serine/threonine protein kinase fused to N-terminal HTH domain                                        | 15920414  | 198           | Crenarchaeota                    | Sulfolobus tokodaii str. 7           |
| Acd1_1002  | C2 | arCOG01695 | K | -      | Predicted RNA-binding protein homologous to eukaryotic snRNP                                                   | 15920412  | 157           | Crenarchaeota                    | Sulfolobus tokodaii str. 7           |
| Acd1_1003  | C2 | arCOG05042 | S | 0      | Uncharacterized conserved protein                                                                              | 15920411  | 104           | Crenarchaeota                    | Sulfolobus tokodaii str. 7           |
| Acd1_1004  | C2 | arCOG04250 | R | -      | PfII-domain and Zn ribbon                                                                                      | 332796294 | 38.5          | Crenarchaeota                    | Acidinus hospitalis W1               |
| Acd1_1005  | C2 | arCOG01336 | S | AMMCE1 | Uncharacterized conserved protein                                                                              | 332796295 | 358           | Crenarchaeota                    | Acidinus hospitalis W1               |
| Acd1_1006  | C2 | arCOG01218 | O | TrxA   | Thiol-disulfide isomerase or thioredoxin                                                                       | 15920408  | 258           | Crenarchaeota                    | Sulfolobus tokodaii str. 7           |
| Acd1_1007  | C2 | arCOG01531 | K | -      | Transcriptional regulator, contains WHH domain                                                                 | 15920407  | 876           | Crenarchaeota                    | Sulfolobus tokodaii str. 7           |
| Acd1_1008  | C2 | arCOG04048 | F | Dcd    | Deoxycytidine deaminase                                                                                        | 70606582  | 154           | Crenarchaeota                    | Sulfolobus acidocaldarius DSM 639    |
| Acd1_1009  | C2 | arCOG01347 | L | COG9   | ATP-dependent DNA ligase                                                                                       | 15920405  | 664           | Crenarchaeota                    | Sulfolobus tokodaii str. 7           |
| Acd1_1010  | C2 | arCOG00545 | J | YSH1   | Predicted exonuclease of the beta-lactamase fold involved in RNA processing                                    | 15920404  | 205           | Crenarchaeota                    | Sulfolobus tokodaii str. 7           |
| Acd1_1011  | C2 | arCOG01377 | R | -      | Phosphodiesterase of AP superfamily                                                                            | 342306112 | 521           | Crenarchaeota                    | Sulfolobus tokodaii str. 7           |
| Acd1_1012  | C2 | arCOG08308 | S | -      | Uncharacterized conserved protein                                                                              | 342306111 | 31.6          | Crenarchaeota                    | Sulfolobus tokodaii str. 7           |
| Acd1_1013  | C2 | arCOG02048 | H | HemD   | Uroporphyrinogen-III synthase                                                                                  | 374632956 | 627           | Crenarchaeota                    | Metallophsphaera yellowstonensis MK1 |
| Acd1_1014  | C2 | arCOG04259 | H | HemC   | Porphobilinogen deaminase                                                                                      | 15920398  | 670           | Crenarchaeota                    | Sulfolobus tokodaii str. 7           |
| Acd1_1015  | C2 | arCOG00918 | H | HemL   | Glutamate-1-semialdehyde aminotransferase                                                                      | 363548517 | 45.1          | Crenarchaeota                    | Sulfolobus tokodaii str. 7           |
| Acd1_1016  | C2 | arCOG04300 | H | HemB   | Delta-aminolevulinic acid dehydratase                                                                          | 15920396  | 112           | Crenarchaeota                    | Sulfolobus tokodaii str. 7           |
| Acd1_1017  | C2 | arCOG01036 | H | HemA   | Glutamyl-tRNA reductase                                                                                        | 146302999 | 232           | Crenarchaeota                    | Metallophsphaera sedula DSM 5348     |
| Acd1_1018  | C2 | arCOG01044 | H | CyG    | Sirohemase (precorrin-2 oxidase/ferrochelatase domain)                                                         | 70606572  | 401           | Crenarchaeota                    | Metallophsphaera sedula DSM 5348     |
| Acd1_1019  | C2 | arCOG04056 | K | Exo    | 15920378                                                                                                       | 224       | Crenarchaeota | Metallophsphaera sedula DSM 5348 |                                      |
| Acd1_1020  | C2 | arCOG07192 | K | -      | Predicted transcriptional regulator, PaDr family                                                               | 342306105 | 145           | Crenarchaeota                    | Sulfolobus tokodaii str. 7           |
| Acd1_1021  | C2 | arCOG01308 | O | Cdc48  | ATPase of the AAA+ class , CDC48 family                                                                        | 342306104 | 302           | Crenarchaeota                    | Sulfolobus tokodaii str. 7           |
| Acd1_1022  | C2 | arCOG01988 | J | EFB1   | Translation elongation factor EF-beta                                                                          | 15897128  | 244           | Crenarchaeota                    | Sulfolobus solfataricus P2           |
| Acd1_1023  | C2 | arCOG01989 | J | -      | Predicted Zn-ribbon RNA-binding protein with a function in translation                                         | 15920390  | 149           | Crenarchaeota                    | Sulfolobus tokodaii str. 7           |
| Acd1_1024  | C2 | arCOG04228 | T | pth2   | Peptidyl-tRNA hydrolase                                                                                        | 15920389  | 854           | Crenarchaeota                    | Sulfolobus tokodaii str. 7           |
| Acd1_1025  | C2 | arCOG04252 | J | -      | RNA pseudouridine synthase D                                                                                   | 15920388  | 169           | Crenarchaeota                    | Sulfolobus tokodaii str. 7           |
| Acd1_1026  | C2 | arCOG01761 | K | NusA   | Transcription elongation factor                                                                                | 227828227 | 982           | Crenarchaeota                    | Sulfolobus islandicus M.14.25        |
| Acd1_1027  | C2 | arCOG04049 | J | RPL40A | Ribosomal protein L40E                                                                                         | 15920384  | 181           | Crenarchaeota                    | Sulfolobus tokodaii str. 7           |
| Acd1_1028  | C2 | arCOG02687 | G | Prop   | Permease of the major facilitator superfamily                                                                  | 15922786  | 1082          | Crenarchaeota                    | Sulfolobus tokodaii str. 7           |
| IRNAValTAC |    |            |   |        | IRNAValTAC                                                                                                     |           |               |                                  |                                      |
| Acd1_1029  | C2 | arCOG08309 | S | -      | Uncharacterized conserved protein                                                                              | 374632872 | 57.8          | Crenarchaeota                    | Metallophsphaera yellowstonensis MK1 |
| Acd1_1030  | C2 |            | S | -      | Uncharacterized protein                                                                                        |           |               |                                  |                                      |
| Acd1_1031  | C2 |            | S | -      | Uncharacterized protein                                                                                        |           |               |                                  |                                      |
| Acd1_1032  | C2 | arCOG05933 | R | -      | Rossmann-fold NAD(P)+-binding protein                                                                          | 15920380  | 768           | Crenarchaeota                    | Sulfolobus tokodaii str. 7           |
| Acd1_1033  | C2 | arCOG00016 | G | RbsK   | Sugar kinase, ribokinase family                                                                                | 146302944 | 514           | Crenarchaeota                    | Metallophsphaera sedula DSM 5348     |
| Acd1_1034  | C2 | arCOG05934 | S | -      | CZH2-type zinc finger                                                                                          | 15920378  | 224           | Crenarchaeota                    | Sulfolobus tokodaii str. 7           |
| Acd1_1035  | C2 | arCOG00068 | M | GuiQ   | Predicted sugar phosphate isomerase involved in capsule formation                                              | 330835694 | 479           | Crenarchaeota                    | Metallophsphaera cuprina Ar-4        |
| Acd1_1036  | C2 | arCOG05935 | R | -      | Predicted ATPase/Helicase                                                                                      | 15920376  | 474           | Crenarchaeota                    | Sulfolobus tokodaii str. 7           |
| Acd1_1037  | C2 | arCOG05463 | S | -      | Uncharacterized conserved protein                                                                              | 70606548  | 142           | Crenarchaeota                    | Sulfolobus acidocaldarius DSM 639    |
| Acd1_1038  | C2 | arCOG00495 | E | ArgC   | Acetylglutamate semialdehyde dehydrogenase                                                                     | 161751104 | 669           | Crenarchaeota                    | Sulfolobus tokodaii str. 7           |
| Acd1_1039  | C2 | arCOG00862 | E | ArgB   | Acetylglutamate kinase                                                                                         | 70606550  | 75.5          | Crenarchaeota                    | Sulfolobus acidocaldarius DSM 639    |
| Acd1_1040  | C2 | arCOG01580 | K | Ltp    | Transcriptional regulator, lctR family                                                                         | 332796569 | 492           | Crenarchaeota                    | Acidinus hospitalis W1               |
| Acd1_1041  | C2 | arCOG01588 | E | LysW   | lysine biosynthesis protein LysW                                                                               | 146302952 | 91.6          | Crenarchaeota                    | Metallophsphaera sedula DSM 5348     |
| Acd1_1042  | C2 | arCOG01589 | H | RimK   | Glutathione synthase/glutaminyl transferase/alpha-L-glutamate ligase                                           | 15920370  | 86.3          | Crenarchaeota                    | Sulfolobus tokodaii str. 7           |
| Acd1_1043  | C2 | arCOG00914 | E | ArgD   | Ornithine/acetylornithine aminotransferase                                                                     | 15920369  | 144           | Crenarchaeota                    | Sulfolobus tokodaii str. 7           |
| Acd1_1044  | C2 | arCOG01107 | E | ArgE   | Acetylornithine deacetylase/Succinyl-diaminopimelate desuccinylase or related deacylase                        | 332796573 | 1166          | Crenarchaeota                    | Acidinus hospitalis W1               |
| Acd1_1045  | C2 | arCOG01532 | I | UppS   | Undecaprenyl pyrophosphate synthase                                                                            | 15920367  | 180           | Crenarchaeota                    | Sulfolobus tokodaii str. 7           |
| Acd1_1046  | C2 | arCOG04154 | J | RPS8A  | Ribosomal protein S8E                                                                                          | 70606557  | 624           | Crenarchaeota                    | Sulfolobus acidocaldarius DSM 639    |
| Acd1_1047  | C2 | arCOG01217 | U | SEC65  | Signal recognition particle 19 kDa protein                                                                     | 332796576 | 561           | Crenarchaeota                    | Acidinus hospitalis W1               |
| IRNALysTTT |    |            |   |        | IRNALysTTT                                                                                                     |           |               |                                  |                                      |
| IRNA1048   |    |            |   |        | IRNA1048                                                                                                       |           |               |                                  |                                      |
| IRNACyGCA  |    |            |   |        | IRNACyGCA                                                                                                      |           |               |                                  |                                      |
| Acd1_1049  | C2 | arCOG04119 | R | -      | Predicted nucleotidyltransferase                                                                               | 15920383  | 324           | Crenarchaeota                    | Sulfolobus tokodaii str. 7           |
| Acd1_1050  | C2 | arCOG07272 | M | Slab   | S-layer protein Slab                                                                                           | 15922525  | 306           | Crenarchaeota                    | Sulfolobus tokodaii str. 7           |
| Acd1_1051  | C2 | arCOG06039 | M | SlAa   | S-layer protein SlAa                                                                                           | 70608059  | 644           | Crenarchaeota                    | Sulfolobus acidocaldarius DSM 639    |
| Acd1_1052  | C2 | arCOG07273 | R | -      | Predicted periplasmic protein                                                                                  | 229579620 | 224           | Crenarchaeota                    | Sulfolobus islandicus Y.G.57.14      |
| Acd1_1053  | C2 | arCOG04137 | H | SAM1   | S-adenosylhomocysteine hydrolase                                                                               | 15920541  | 187           | Crenarchaeota                    | Sulfolobus tokodaii str. 7           |
| IRNAMetCAT |    |            |   |        | IRNAMetCAT                                                                                                     |           |               |                                  |                                      |
| Acd1_1054  | C2 | arCOG00180 | O | SlpA   | FKBP-type peptidyl-prolyl cis-trans isomerase 2                                                                | 15920545  | 452           | Crenarchaeota                    | Sulfolobus tokodaii str. 7           |
| Acd1_1055  | C2 | arCOG00982 | C | GidA   | Glycerol dehydrogenase or related enzyme                                                                       | 15920544  | 232           | Crenarchaeota                    | Sulfolobus tokodaii str. 7           |
| Acd1_1056  | C2 | arCOG00543 | R | -      | Predicted metal-dependent RNase, consists of a metallo-beta-lactamase domain and an RNA-binding KH domain      | 15920543  | 215           | Crenarchaeota                    | Sulfolobus tokodaii str. 7           |
| IRNAValGAC |    |            |   |        | IRNAValGAC                                                                                                     |           |               |                                  |                                      |
| Acd1_1057  | C2 | arCOG02862 | S | -      | Predicted membrane protein, DooX family                                                                        | 22213646  | 630           | Crenarchaeota                    | Acidinus ambivalens                  |
| Acd1_1058  | C2 | arCOG05342 | C | -      | Thiosulfate:quinone oxidoreductase (TQO) small subunit DooX                                                    | 229578710 | 211           | Crenarchaeota                    | Sulfolobus islandicus Y.G.57.14      |
| Acd1_1059  | C2 | arCOG06050 | S | -      | Predicted membrane protein                                                                                     | 332797149 | 1102          | Crenarchaeota                    | Acidinus hospitalis W1               |
| Acd1_1060  | C2 | arCOG08475 | S | -      | Uncharacterized conserved protein                                                                              | 342306268 | 184           | Crenarchaeota                    | Sulfolobus tokodaii str. 7           |
| Acd1_1062  | C2 | arCOG05923 | S | -      | Uncharacterized conserved protein                                                                              | 70606215  | 332           | Crenarchaeota                    | Sulfolobus acidocaldarius DSM 639    |
| Acd1_1061  | C2 |            | S | -      | Uncharacterized protein                                                                                        |           |               |                                  |                                      |
| IRNAValCAC |    |            |   |        | IRNAValCAC                                                                                                     |           |               |                                  |                                      |
| Acd1_1063  | C2 | arCOG01019 | R | -      | SpoU rRNA Methylase family enzyme                                                                              | 70606457  | 340           | Crenarchaeota                    | Sulfolobus acidocaldarius DSM 639    |
| Acd1_1064  | C2 | arCOG01557 | L | Dcm    | Site-specific DNA methylase                                                                                    | 332796494 | 94            | Crenarchaeota                    | Acidinus hospitalis W1               |
| Acd1_1065  | C2 | arCOG04270 | K | TF1A   |                                                                                                                |           |               |                                  |                                      |

|            |    |            |   |             |                                                                                                                                          |           |      |               |                                       |
|------------|----|------------|---|-------------|------------------------------------------------------------------------------------------------------------------------------------------|-----------|------|---------------|---------------------------------------|
| Acid1_1091 | C2 | arCOG02957 | U | SBH1        | Preprotein translocase subunit SecE1beta<br>RNaseP RNA                                                                                   | 15920503  | 227  | Crenarchaeota | Sulfolobus tokodaii str. 7            |
| Acid1_1092 | C2 | arCOG07433 | S | -           | Uncharacterized conserved protein, contains FerL-like metal-binding domain ortholog of eukaryotic RNase L inhibitor RL N-terminal domain | 15890743  | 62   | Crenarchaeota | Sulfolobus solfataricus P2            |
| Acid1_1093 | C2 | arCOG01117 | K | Lrp         | Lrp/AsnC Family C-terminal domain<br>RNA(le)2 2-azmagamylcytidine synthetase; containing Zn-ribbon domain and OB-fold domain             | 15920505  | 97.4 | Crenarchaeota | Sulfolobus tokodaii str. 7            |
| Acid1_1094 | C2 | arCOG01115 | J | TiaS        | RNAA1aGCG                                                                                                                                | 374633141 | 338  | Crenarchaeota | Metallorhodospira yellowstonensis MK1 |
| Acid1_1095 | C2 | arCOG00467 | L | CD06        | CD06-related protein, AAA superfamily ATPase                                                                                             | 322796464 | 537  | Crenarchaeota | Acidianus hospitalis W1               |
| Acid1_1096 | C2 | arCOG00928 | L | -           | Endonuclease V homolog                                                                                                                   | 363548495 | 316  | Crenarchaeota | Sulfolobus tokodaii str. 7            |
| Acid1_1097 | C2 | arCOG00773 | I | -           | Acyl-CoA hydrolase                                                                                                                       | 15920495  | 154  | Crenarchaeota | Sulfolobus tokodaii str. 7            |
| Acid1_1098 | C2 | arCOG00972 | F | NadrR       | Nicotinamide mononucleotide adenylyltransferase                                                                                          | 322796461 | 122  | Crenarchaeota | Acidianus hospitalis W1               |
| Acid1_1099 | C2 | arCOG04309 | H | -           | S-adenosyl-L-methionine hydroxide adenosyltransferase                                                                                    | 374633147 | 42   | Crenarchaeota | Metallorhodospira yellowstonensis MK1 |
| Acid1_1100 | C2 | arCOG01723 | F | Cyab        | Adenylyl cyclase, class 2 (thermophilic)                                                                                                 | 15920492  | 114  | Crenarchaeota | Sulfolobus tokodaii str. 7            |
| Acid1_1101 | C2 | arCOG00973 | J | Sun         | RNA or rRNA cytosine C5-methylase                                                                                                        | 322796458 | 90.4 | Crenarchaeota | Acidianus hospitalis W1               |
| Acid1_1102 | C2 | arCOG00993 | J | NI7P        | Protein involved in ribosomal biogenesis, contains PUA domain                                                                            | 342306136 | 327  | Crenarchaeota | Sulfolobus tokodaii str. 7            |
| Acid1_1103 | C2 | arCOG00415 | L | RecA        | RecA/RadA recombinase                                                                                                                    | 15920489  | 646  | Crenarchaeota | Sulfolobus tokodaii str. 7            |
| Acid1_1104 | C2 | arCOG00419 | F | Hit         | HIT family hydrolase                                                                                                                     | 227282153 | 353  | Crenarchaeota | Sulfolobus islandicus M.14.25         |
| Acid1_1105 | C2 | arCOG01431 | E | IwaA        | Theonine dehydratase                                                                                                                     | 15920487  | 327  | Crenarchaeota | Sulfolobus tokodaii str. 7            |
| Acid1_1106 | C2 | arCOG02355 | L | PheA        | Prephenate dehydratase                                                                                                                   | 15920486  | 414  | Crenarchaeota | Sulfolobus tokodaii str. 7            |
| Acid1_1107 | C2 | arCOG01628 | K | Lrp         | Transcriptional regulator (Lrp/AsnC family)                                                                                              | 332796452 | 488  | Crenarchaeota | Acidianus hospitalis W1               |
| Acid1_1108 | C2 | arCOG02331 | R | -           | Uncharacterized FAD-dependent dehydrogenase                                                                                              | 15920484  | 575  | Crenarchaeota | Sulfolobus tokodaii str. 7            |
| Acid1_1109 | C2 | arCOG04387 | F | PurA        | Adenylosuccinate synthase                                                                                                                | 15920483  | 300  | Crenarchaeota | Sulfolobus tokodaii str. 7            |
| Acid1_1110 | C2 | arCOG04346 | F | -           | 5-formaminoimidazole-4-carboxamide-1-beta-D-ribofuranosyl 5'-monophosphate synthetase (purine biosynthesis)                              | 15920482  | 456  | Crenarchaeota | Sulfolobus tokodaii str. 7            |
| Acid1_1111 | C2 | arCOG04346 | F | -           | 5-formaminoimidazole-4-carboxamide-1-beta-D-ribofuranosyl 5'-monophosphate synthetase (purine biosynthesis)                              | 15920481  | 514  | Crenarchaeota | Sulfolobus tokodaii str. 7            |
| Acid1_1112 | C2 | arCOG01747 | F | PurB        | Adenylosuccinate lyase                                                                                                                   | 15920480  | 379  | Crenarchaeota | Sulfolobus tokodaii str. 7            |
| Acid1_1113 | C2 | arCOG00638 | H | ThiL        | Thiamine monophosphate kinase                                                                                                            | 15920479  | 92   | Crenarchaeota | Sulfolobus tokodaii str. 7            |
| Acid1_1114 | C2 | arCOG00973 | J | Sun         | Radical SAM superfamily enzyme                                                                                                           | 15920478  | 75   | Crenarchaeota | Sulfolobus tokodaii str. 7            |
| Acid1_1115 | C2 | arCOG05932 | R | GloB        | Zn-dependent hydrolase, glyoxylase family<br>Adenine/guanine phosphoribosyltransferase or related PRPP-binding protein                   | 70606505  | 372  | Crenarchaeota | Sulfolobus acidocaldarius DSM 639     |
| Acid1_1116 | C2 | arCOG00331 | F | Apt         | Protein                                                                                                                                  | 70606504  | 388  | Crenarchaeota | Sulfolobus acidocaldarius DSM 639     |
| Acid1_1117 | C2 | arCOG07138 | J | GaB         | Asp-RNAAsn/Glu-RNAAsn amidotransferase B subunit                                                                                         | 15920474  | 325  | Crenarchaeota | Sulfolobus tokodaii str. 7            |
| Acid1_1118 | C2 | arCOG04314 | J | RPS28A      | Ribosomal protein S28E/S33                                                                                                               | 322796438 | 558  | Crenarchaeota | Acidianus hospitalis W1               |
| Acid1_1119 | C2 | arCOG01950 | J | RPL24A      | Ribosomal protein L24E                                                                                                                   | 15897177  | 286  | Crenarchaeota | Sulfolobus solfataricus P2            |
| Acid1_1120 | C2 | arCOG04313 | F | Ndk         | Nucleoside diphosphate kinase                                                                                                            | 119364621 | 1279 | Crenarchaeota | Sulfolobus tokodaii str. 7            |
| Acid1_1121 | C2 | arCOG01560 | J | InfB        | Translation initiation factor 2 (IF-2; GTPase)                                                                                           | 15920469  | 449  | Crenarchaeota | Sulfolobus tokodaii str. 7            |
| Acid1_1122 | C2 | arCOG00853 | C | SfcA        | Malic enzyme                                                                                                                             | 15920468  | 117  | Crenarchaeota | Sulfolobus tokodaii str. 7            |
| Acid1_1123 | C2 | arCOG04258 | K | RPB5        | DNA-directed RNA polymerase, subunit H, RpoH/RPB5                                                                                        | 46668     | 331  | Crenarchaeota | Sulfolobus acidocaldarius             |
| Acid1_1124 | C2 | arCOG01762 | K | RpoB/Rpo2   | DNA-directed RNA polymerase subunit B                                                                                                    | 15920466  | 197  | Crenarchaeota | Sulfolobus tokodaii str. 7            |
| Acid1_1125 | C2 | arCOG04257 | K | RpoC/Rpo3   | DNA-directed RNA polymerase subunit A'                                                                                                   | 15897171  | 486  | Crenarchaeota | Sulfolobus solfataricus P2            |
| Acid1_1126 | C2 | arCOG04256 | K | RpoC/Rpo11  | DNA-directed RNA polymerase subunit A'                                                                                                   | 227282175 | 183  | Crenarchaeota | Sulfolobus islandicus M.14.25         |
| Acid1_1127 | C2 | arCOG01752 | J | RPL30       | Ribosomal protein L30E                                                                                                                   | 15920463  | 368  | Crenarchaeota | Sulfolobus tokodaii str. 7            |
| Acid1_1128 | C2 | arCOG01760 | K | NusA        | Transcription elongation factor                                                                                                          | 161751010 | 215  | Crenarchaeota | Sulfolobus tokodaii str. 7            |
| Acid1_1129 | C2 | arCOG04255 | J | RpsL        | Ribosomal protein S11                                                                                                                    | 15920461  | 227  | Crenarchaeota | Sulfolobus tokodaii str. 7            |
| Acid1_1130 | C2 | arCOG01759 | S | -           | Uncharacterized conserved protein                                                                                                        | 15920460  | 249  | Crenarchaeota | Sulfolobus tokodaii str. 7            |
| Acid1_1131 | C2 | arCOG04254 | J | RpsG        | Ribosomal protein S7                                                                                                                     | 15920459  | 142  | Crenarchaeota | Sulfolobus tokodaii str. 7            |
| Acid1_1132 | C2 | arCOG01561 | J | TEF1        | Translation elongation factor EF-1alpha (GTPase)                                                                                         | 15920458  | 129  | Crenarchaeota | Sulfolobus tokodaii str. 7            |
| Acid1_1133 | C2 | arCOG01758 | J | RpsJ        | Ribosomal protein S10                                                                                                                    | 15920457  | 168  | Crenarchaeota | Sulfolobus tokodaii str. 7            |
| Acid1_1134 | C2 | arCOG03708 | R | HEPN domain | Uncharacterized protein                                                                                                                  | 332797315 | 107  | Crenarchaeota | Acidianus hospitalis W1               |
| Acid1_1135 | C2 | arCOG04397 | P | AmtB        | Ammonia permease                                                                                                                         | 15920882  | 124  | Crenarchaeota | Sulfolobus tokodaii str. 7            |
| Acid1_1136 | C2 | arCOG00571 | P | SdhA        | Succinate dehydrogenase/fumarate reductase, flavoprotein subunit                                                                         | 15920713  | 220  | Crenarchaeota | Sulfolobus tokodaii str. 7            |
| Acid1_1137 | C2 | arCOG00982 | F | FrhB        | Succinate dehydrogenase/fumarate reductase, Fe-S protein subunit                                                                         | 15920705  | 289  | Crenarchaeota | Sulfolobus solfataricus DSM 639       |
| Acid1_1138 | C2 | arCOG00338 | C | SdhC        | Succinate dehydrogenase subunit C                                                                                                        | 3378542   | 135  | Crenarchaeota | Acidianus ambivalens                  |
| Acid1_1140 | C2 | arCOG05375 | C | -           | Archaeal succinate dehydrogenase subunit D                                                                                               | 15920716  | 291  | Crenarchaeota | Sulfolobus tokodaii str. 7            |
| Acid1_1141 | C2 | arCOG00998 | K | LSM1        | Small nuclear ribonucleoprotein (snRNP) homolog                                                                                          | 332796496 | 50.4 | Crenarchaeota | Acidianus hospitalis W1               |
| Acid1_1142 | C2 | arCOG04126 | J | RPL37A      | Ribosomal protein L37E                                                                                                                   | 15920546  | 223  | Crenarchaeota | Sulfolobus tokodaii str. 7            |
| Acid1_1143 | C2 | arCOG00050 | E | SpeE        | Spermiine synthase                                                                                                                       | 15920547  | 115  | Crenarchaeota | Sulfolobus tokodaii str. 7            |
| Acid1_1144 | C2 | arCOG01219 | J | RPL21A      | RNALeuCAG                                                                                                                                | 15897652  | 84   | Crenarchaeota | Sulfolobus solfataricus P2            |
| Acid1_1145 | C2 | arCOG01036 | K | -           | DNA-directed RNA polymerase, subunit F (rhoF)                                                                                            | 15897651  | 93.2 | Crenarchaeota | Sulfolobus solfataricus P2            |
| Acid1_1146 | C2 | arCOG04130 | J | -           | Predicted RNA-binding protein                                                                                                            | 227302060 | 312  | Crenarchaeota | Sulfolobus tokodaii str. 7            |
| Acid1_1147 | C2 | arCOG04131 | J | KsgA        | Dimethyladenosine transferase (rRNA methylation)                                                                                         | 15920668  | 270  | Crenarchaeota | Sulfolobus tokodaii str. 7            |
| Acid1_1148 | C2 | arCOG01019 | J | HemK        | Methylase of polypeptide chain release factors                                                                                           | 332796503 | 43.9 | Crenarchaeota | Acidianus hospitalis W1               |
| Acid1_1149 | C2 | arCOG01018 | J | LasT        | rRNA methylase                                                                                                                           | 15920666  | 140  | Crenarchaeota | Sulfolobus tokodaii str. 7            |
| Acid1_1150 | C2 | arCOG04186 | J | RPS1A       | Ribosomal protein S3AE                                                                                                                   | 15897646  | 344  | Crenarchaeota | Sulfolobus solfataricus P2            |
| Acid1_1151 | C2 | arCOG00666 | M | GCD1        | N-acetylglucosamine-1-phosphate uridylyltransferase                                                                                      | 15920666  | 358  | Crenarchaeota | Sulfolobus tokodaii str. 7            |
| Acid1_1152 | C2 | arCOG00357 | J | -           | Predicted GTPase, probable translation factor                                                                                            | 15920663  | 355  | Crenarchaeota | Sulfolobus tokodaii str. 7            |
| Acid1_1153 | C2 | arCOG04209 | J | RPL15A      | Ribosomal protein L15E                                                                                                                   | 15920662  | 226  | Crenarchaeota | Sulfolobus tokodaii str. 7            |
| Acid1_1154 | C2 | arCOG01042 | J | -           | Exosome subunit, RNA binding protein with dsRBD fold                                                                                     | 332796509 | 587  | Crenarchaeota | Acidianus hospitalis W1               |
| Acid1_1155 | C2 | arCOG03077 | J | RPP1        | RNase P/RNase MRP subunit p30                                                                                                            | 342306200 | 355  | Crenarchaeota | Sulfolobus tokodaii str. 7            |
| Acid1_1156 | C2 | arCOG01365 | J | POPS        | RNase P/RNase MRP subunit POPS                                                                                                           | 15920659  | 143  | Crenarchaeota | Sulfolobus tokodaii str. 7            |
| Acid1_1157 | C2 | arCOG00971 | O | PRE1        | 20S proteasome, alpha subunit                                                                                                            | 21362819  | 252  | Crenarchaeota | Sulfolobus tokodaii str. 7            |
| Acid1_1158 | C2 | arCOG04187 | J | -           | Predicted exosome subunit                                                                                                                | 15920657  | 748  | Crenarchaeota | Sulfolobus tokodaii str. 7            |
| Acid1_1159 | C2 | arCOG00678 | J | RRP4        | RNA-binding protein Rrp4 or related protein (contain S1 domain and KH domain)                                                            | 15920656  | 312  | Crenarchaeota | Sulfolobus tokodaii str. 7            |
| Acid1_1160 | C2 | arCOG01576 | J | Rph         | Ribonuclease PH                                                                                                                          | 15920655  | 198  | Crenarchaeota | Sulfolobus tokodaii str. 7            |
| Acid1_1161 | C2 | arCOG01574 | J | Rph         | RNase PH-related exonuclease                                                                                                             | 15920654  | 202  | Crenarchaeota | Sulfolobus tokodaii str. 7            |
| Acid1_1162 | C2 | arCOG04208 | J | RPL43A      | Ribosomal protein L37AE/L43A                                                                                                             | 227827679 | 250  | Crenarchaeota | Sulfolobus islandicus M.14.25         |
| Acid1_1163 | C2 | arCOG03247 | J | IMP4        | component, contains IMP4 domain                                                                                                          | 70606422  | 151  | Crenarchaeota | Sulfolobus acidocaldarius DSM 639     |
| Acid1_1164 | C2 | arCOG04414 | J | Pcc1        | Subunit of KEOPS complex (Cgl1218UD32KAE1)                                                                                               | 146302866 | 116  | Crenarchaeota | Metallorhodospira sedula DSM 5348     |
| Acid1_1165 | C2 | arCOG01342 | O | GimC        | Prefoldin, chaperonin cofactor                                                                                                           | 15920651  | 250  | Crenarchaeota | Sulfolobus tokodaii str. 7            |
| Acid1_1166 | C2 | arCOG02937 | J | MUS81       | ERCC-type nucleotide endonuclease                                                                                                        | 15920650  | 196  | Crenarchaeota | Sulfolobus tokodaii str. 7            |
| Acid1_1167 | C2 | arCOG01296 | O | TrxB        | Thioredoxin reductase                                                                                                                    | 15920649  | 245  | Crenarchaeota | Sulfolobus tokodaii str. 7            |
| Acid1_1168 | C2 | arCOG01559 | J | FusA        | Translation elongation factor G, EF-G (GTPase)                                                                                           | 21263534  | 484  | Crenarchaeota | Sulfolobus tokodaii str. 7            |
| Acid1_1169 | C2 | arCOG02293 | R | -           | HAD superfamily hydrolase                                                                                                                | 15920647  | 412  | Crenarchaeota | Sulfolobus tokodaii str. 7            |
| Acid1_1170 | C2 | arCOG02960 | R | -           | Predicted aminopeptidase, lap family                                                                                                     | 15920646  | 402  | Crenarchaeota | Sulfolobus tokodaii str. 7            |
| Acid1_1171 | C2 | arCOG04569 | J | RPL19A      | Uncharacterized protein of DMG/NTAB family                                                                                               | 227827697 | 340  | Crenarchaeota | Sulfolobus islandicus M.14.25         |
| Acid1_1172 | C2 | arCOG01163 | C | LeuB        | Isochrysalate/isopropylmalate dehydrogenase                                                                                              | 15920644  | 242  | Crenarchaeota | Sulfolobus tokodaii str. 7            |
| Acid1_1173 | C2 | arCOG00807 | J | IleS        | Isoleucyl-tRNA synthetase                                                                                                                | 161751096 | 412  | Crenarchaeota | Sulfolobus tokodaii str. 7            |
| Acid1_1174 | C2 | arCOG04069 | S | -           | Uncharacterized conserved protein                                                                                                        | 227827690 | 309  | Crenarchaeota | Sulfolobus islandicus M.14.25         |
| Acid1_1175 | C2 | arCOG04070 | J | RplC        | Ribosomal protein L3                                                                                                                     | 15920641  | 568  | Crenarchaeota | Sulfolobus tokodaii str. 7            |
| Acid1_1176 | C2 | arCOG04071 | J | RplD        | Ribosomal protein L4                                                                                                                     | 70606411  | 605  | Crenarchaeota | Sulfolobus acidocaldarius DSM 639     |
| Acid1_1177 | C2 | arCOG04072 | J | RplW        | Ribosomal protein L23                                                                                                                    | 181313003 | 89.7 | Crenarchaeota | Pyrobaculum aerophilum str. IM2       |
| Acid1_1178 | C2 | arCOG04067 | J | RplB        | Ribosomal protein L2                                                                                                                     | 161751097 | 426  | Crenarchaeota | Sulfolobus tokodaii str. 7            |
| Acid1_1179 | C2 | arCOG04099 | J | RpsS        | Ribosomal protein S19                                                                                                                    | 15920637  | 130  | Crenarchaeota | Sulfolobus tokodaii str. 7            |
| Acid1_1180 | C2 | arCOG04098 | J | RplV        | Ribosomal protein L22                                                                                                                    | 15920636  | 408  | Crenarchaeota | Sulfolobus tokodaii str. 7            |
| Acid1_1181 | C2 | arCOG04097 | J | RpsC        | Ribosomal protein S3                                                                                                                     | 15920635  | 30   | Crenarchaeota | Sulfolobus tokodaii str. 7            |
| Acid1_1182 | C2 | arCOG03785 | J | RpmC        | Ribosomal protein L29                                                                                                                    | 20806852  | 1390 | Crenarchaeota | Thermosphaerobacter tengcongensis MB4 |
| Acid1_1183 | C2 | arCOG00784 | J | POD4        | RNase P/RNase MRP subunit p29                                                                                                            | 218884478 | 120  | Crenarchaeota | Desulfurococcus kamchatkensis 1221.n  |
| Acid1_1184 | C2 | arCOG04096 | J | RpsQ        | Ribosomal protein S17                                                                                                                    | 332796537 | 127  | Crenarchaeota | Acidianus hospitalis W1               |
| Acid1_1185 | C2 | arCOG04095 | J | RplN        | Ribosomal protein L14                                                                                                                    | 15920632  | 84   | Crenarchaeota | Sulfolobus tokodaii str. 7            |
| Acid1_1186 | C2 | arCOG04094 | J | RplX        | Ribosomal protein L24                                                                                                                    | 70606401  | 84.7 | Crenarchaeota | Sulfolobus acidocaldarius DSM 639     |
| Acid1_1187 | C2 | arCOG04093 | J | RPS4A       | Ribosomal protein S4E                                                                                                                    | 161751098 | 161  | Crenarchaeota | Sulfolobus tokodaii str. 7            |
| Acid1_1188 | C2 | arCOG04092 | J | RplE        | Ribosomal protein L5                                                                                                                     | 15920629  | 112  | Crenarchaeota | Sulfolobus tokodaii str. 7            |
| Acid1_1189 | C2 | arCOG00782 | J | RpsN        | Ribosomal protein S14                                                                                                                    | 161751099 | 148  | Crenarchaeota | Sulfolobus tokodaii str. 7            |
| Acid1_1190 | C2 | arCOG04091 | J | RpsH        | Ribosomal protein S8                                                                                                                     | 15920627  | 291  | Crenarchaeota | Sulfolobus tokodaii str. 7            |
| Acid1_1191 | C2 | arCOG04090 | J | RplF        | Ribosomal protein L6P                                                                                                                    | 15920626  | 1158 | Crenarchaeota | Sulfolobus tokodaii str. 7            |
| Acid1_1192 | C2 | arCOG00781 | J | RPL32       | Ribosomal protein L32E</                                                                                                                 |           |      |               |                                       |

|            |    |            |   |        |                                                                                                                                        |           |      |                |                                    |
|------------|----|------------|---|--------|----------------------------------------------------------------------------------------------------------------------------------------|-----------|------|----------------|------------------------------------|
| Acd1_1214  | C2 | arCOG0087  | F | GuaA   | GMP synthase - Glutamine amidotransferase domain                                                                                       | 15920795  | 259  | Crenarchaeota  | Sulfolobus tokodaii str. 7         |
| Acd1_1215  | C2 | arCOG0087  | F | GuaA   | GMP synthase - Glutamine amidotransferase domain                                                                                       | 70606367  | 403  | Crenarchaeota  | Sulfolobus acidocaldarius DSM 639  |
| Acd1_1216  | C2 | arCOG01072 | L | MutT   | NUDIX Family Hydrolase                                                                                                                 | 70606369  | 976  | Crenarchaeota  | Sulfolobus acidocaldarius DSM 639  |
| Acd1_1217  | C2 | arCOG04008 | K | TP49   | DNA helicase TP49, TRP-interacting protein                                                                                             | 70606370  | 109  | Crenarchaeota  | Sulfolobus acidocaldarius DSM 639  |
| Acd1_1218  | C2 | arCOG0014  | G | RbsK   | Sugar kinase, ribokinase family                                                                                                        | 15920792  | 191  | Crenarchaeota  | Sulfolobus tokodaii str. 7         |
| Acd1_1219  | C2 | arCOG05929 | S | -      | Uncharacterized conserved protein                                                                                                      | 15899192  | 414  | Crenarchaeota  | Sulfolobus solfataricus P2         |
| Acd1_1220  | C2 | arCOG01457 | R | AdhP   | D-arabinose 1-dehydrogenase or another Zn-dependent alcohol dehydrogenase                                                              | 15920787  | 97.8 | Crenarchaeota  | Sulfolobus tokodaii str. 7         |
| Acd1_1221  | C2 | arCOG04135 | J | RCL1   | RNA 3'-terminal phosphate cyclase                                                                                                      | 15920788  | 632  | Crenarchaeota  | Sulfolobus tokodaii str. 7         |
| Acd1_1222  | C2 | arCOG01909 | E | GlnA   | Glutamine synthetase                                                                                                                   | 374631992 | 575  | Crenarchaeota  | Metallolphaera yellowstonensis MK1 |
| Acd1_1223  | C2 | arCOG00033 | J | TrmS   | Wybutosine (YW) biosynthesis enzyme, TrmS methyltransferase                                                                            | 15899187  | 146  | Crenarchaeota  | Sulfolobus solfataricus P2         |
| Acd1_1224  | C2 | arCOG0695  | F | SsnA   | Cytosine deaminase or related metal-dependent hydrolase                                                                                | 15920784  | 701  | Crenarchaeota  | Sulfolobus tokodaii str. 7         |
| Acd1_1225  | C2 | -          | S | -      | Uncharacterized protein                                                                                                                | -         | -    | -              | -                                  |
| Acd1_1226  | C2 | arCOG07321 | S | -      | Uncharacterized conserved protein                                                                                                      | 146303390 | 35.8 | Crenarchaeota  | Metallolphaera sedula DSM 5348     |
| Acd1_1227  | C2 | arCOG06644 | H | CysG   | Unoporphyrinogen III methylase<br>Aerobic-type carbon monoxide dehydrogenase, middle subunit CoxM/CutM                                 | 332797896 | 236  | Crenarchaeota  | Acidianus hospitalis W1            |
| Acd1_1228  | C2 | arCOG01926 | C | CoxM   | homolog<br>Aerobic-type carbon monoxide dehydrogenase, small subunit CoxS/CutS                                                         | 374632001 | 467  | Crenarchaeota  | Metallolphaera yellowstonensis MK1 |
| Acd1_1229  | C2 | arCOG01925 | C | CoxS   | homolog<br>GT-A family glycosyltransferase involved in molybdopterin guanine dinucleotide biosynthesis                                 | 15920779  | 116  | Crenarchaeota  | Sulfolobus tokodaii str. 7         |
| Acd1_1230  | C2 | arCOG01873 | H | MobA   | Carbon monoxide dehydrogenase subunit G, CoxG                                                                                          | 307595190 | 304  | Crenarchaeota  | Vulcanisaeta distributa DSM 14429  |
| Acd1_1231  | C2 | arCOG01928 | C | -      | -                                                                                                                                      | 332797890 | 109  | Crenarchaeota  | Acidianus hospitalis W1            |
| Acd1_1232  | C2 | arCOG01562 | R | GTPBP1 | Carbon monoxide dehydrogenase subunit G, CoxG                                                                                          | 15899178  | 134  | Crenarchaeota  | Sulfolobus solfataricus P2         |
| Acd1_1233  | C2 | arCOG04265 | R | -      | C4-type Zn-finger protein                                                                                                              | 15920774  | 467  | Crenarchaeota  | Sulfolobus tokodaii str. 7         |
| Acd1_1234  | C2 | arCOG01831 | O | IbpA   | Molecular chaperone (HSP20 family)                                                                                                     | 15920763  | 572  | Crenarchaeota  | Sulfolobus tokodaii str. 7         |
| Acd1_1235  | C2 | arCOG02706 | E | GloA   | Lactoylglutathione lyase or related enzyme                                                                                             | 15920772  | 124  | Crenarchaeota  | Sulfolobus tokodaii str. 7         |
| Acd1_1236  | C2 | arCOG04232 | I | Sbm    | Methylmalonyl-CoA mutase                                                                                                               | 15920771  | 238  | Crenarchaeota  | Sulfolobus tokodaii str. 7         |
| Acd1_1237  | C2 | arCOG00040 | R | -      | Predicted phosphoribosyltransferase                                                                                                    | 227826623 | 329  | Crenarchaeota  | Sulfolobus islandicus M.14.25      |
| Acd1_1238  | C2 | arCOG01378 | R | -      | Uncharacterized protein of the AP superfamily                                                                                          | 332797883 | 192  | Crenarchaeota  | Acidianus hospitalis W1            |
| Acd1_1239  | C2 | -          | S | -      | Uncharacterized protein                                                                                                                | -         | -    | -              | -                                  |
| Acd1_1240  | C2 | arCOG01308 | O | Cdc48  | ATPase of the AAA class, CDC48 family<br>Archaeal fructose-1,6-bisphosphatase or related enzyme of inositol monophosphatase family     | 15920767  | 428  | Crenarchaeota  | Sulfolobus tokodaii str. 7         |
| Acd1_1241  | C2 | arCOG01349 | G | CoxH   | Thioredoxin reductase                                                                                                                  | 15920766  | 478  | Crenarchaeota  | Sulfolobus tokodaii str. 7         |
| Acd1_1242  | C2 | arCOG01296 | O | TrxB   | Thioredoxin reductase                                                                                                                  | 15920765  | 107  | Crenarchaeota  | Sulfolobus tokodaii str. 7         |
| Acd1_1243  | C2 | arCOG01978 | H | FoIP   | Dihydropterolate synthase or related enzyme                                                                                            | 15899167  | 272  | Crenarchaeota  | Sulfolobus solfataricus P2         |
| Acd1_1244  | C2 | arCOG05949 | S | -      | Uncharacterized conserved protein                                                                                                      | 15920763  | 58.9 | Crenarchaeota  | Sulfolobus tokodaii str. 7         |
| Acd1_1245  | C2 | arCOG02172 | H | -      | 6-pyruvoyl-tetrahydropterin synthase                                                                                                   | 15899165  | 478  | Crenarchaeota  | Sulfolobus solfataricus P2         |
| Acd1_1247  | C2 | arCOG05950 | S | -      | Uncharacterized conserved protein                                                                                                      | 70606720  | 621  | Crenarchaeota  | Sulfolobus acidocaldarius DSM 639  |
| Acd1_1246  | C2 | arCOG05951 | S | -      | Uncharacterized conserved protein                                                                                                      | 15920760  | 136  | Crenarchaeota  | Sulfolobus tokodaii str. 7         |
| Acd1_1248  | C2 | arCOG05952 | S | -      | Uncharacterized conserved protein                                                                                                      | 15920759  | 168  | Crenarchaeota  | Sulfolobus tokodaii str. 7         |
| Acd1_1249  | C2 | arCOG01295 | S | -      | Uncharacterized conserved protein                                                                                                      | 15899161  | 242  | Crenarchaeota  | Sulfolobus solfataricus P2         |
| Acd1_1250  | C2 | arCOG04303 | R | -      | Uncharacterized conserved protein                                                                                                      | 15899160  | 436  | Crenarchaeota  | Sulfolobus solfataricus P2         |
| Acd1_1251  | C2 | arCOG02002 | E | LeuA   | Isopropylmalate/homocitrate/citramalate synthase                                                                                       | 70606725  | 129  | Crenarchaeota  | Sulfolobus acidocaldarius DSM 639  |
| Acd1_1252  | C2 | arCOG00497 | R | -      | Zn-dependent hydrolase of the beta-lactamase fold                                                                                      | 15899158  | 82.4 | Crenarchaeota  | Sulfolobus solfataricus P2         |
| Acd1_1253  | C2 | arCOG03845 | V | -      | Predicted antioxin, copG family                                                                                                        | 332797868 | 0    | Crenarchaeota  | Acidianus hospitalis W1            |
| Acd1_1254  | C2 | arCOG01465 | S | -      | Uncharacterized conserved protein                                                                                                      | 342306234 | 80.1 | Crenarchaeota  | Sulfolobus tokodaii str. 7         |
| Acd1_1255  | C2 | arCOG01117 | K | Ltp    | Lrp/AscS family C-terminal domain                                                                                                      | 15920753  | 59.3 | Crenarchaeota  | Sulfolobus tokodaii str. 7         |
| Acd1_1256  | C2 | arCOG01462 | C | NuB    | ABC-type Na <sup>+</sup> efflux pump, permease component                                                                               | 15920752  | 128  | Crenarchaeota  | Sulfolobus tokodaii str. 7         |
| Acd1_1257  | C2 | arCOG01914 | V | CcmA   | ABC-type multidrug transport system, ATPase component                                                                                  | 146303400 | 228  | Crenarchaeota  | Metallolphaera sedula DSM 5348     |
| Acd1_1258  | C2 | arCOG04261 | S | -      | Uncharacterized conserved protein                                                                                                      | 70606732  | 640  | Crenarchaeota  | Sulfolobus acidocaldarius DSM 639  |
| Acd1_1259  | C2 | arCOG00584 | H | PanB   | Ketopantoate hydroxymethyltransferase                                                                                                  | 15899151  | 219  | Crenarchaeota  | Sulfolobus solfataricus P2         |
| Acd1_1260  | C2 | arCOG04262 | H | -      | Phosphopantoate synthetase                                                                                                             | 15920748  | 127  | Crenarchaeota  | Sulfolobus tokodaii str. 7         |
| Acd1_1261  | C2 | arCOG04263 | H | -      | Pantoate kinase                                                                                                                        | 374632006 | 624  | Crenarchaeota  | Metallolphaera yellowstonensis MK1 |
| Acd1_1262  | C2 | arCOG07320 | C | GlpC   | Fe-S oxidoreductase                                                                                                                    | 332797860 | 72   | Crenarchaeota  | Acidianus hospitalis W1            |
| Acd1_1263  | C2 | arCOG05953 | S | -      | Uncharacterized conserved protein                                                                                                      | 15899147  | 683  | Crenarchaeota  | Sulfolobus solfataricus P2         |
| Acd1_1264  | C2 | arCOG00536 | H | MoaD   | Molybdopterin converting factor, small subunit                                                                                         | 374632045 | 400  | Crenarchaeota  | Metallolphaera yellowstonensis MK1 |
| Acd1_1265  | C2 | arCOG00200 | H | ThiD   | Hydroxymethylpyrimidine/phosphomethylpyrimidine kinase                                                                                 | 374632046 | 36.2 | Crenarchaeota  | Metallolphaera yellowstonensis MK1 |
| Acd1_1266  | C2 | arCOG04311 | R | RnhB   | Predicted hydrolase of HD superfamily                                                                                                  | 15899144  | 127  | Crenarchaeota  | Sulfolobus solfataricus P2         |
| Acd1_1267  | C2 | arCOG01711 | C | Ppa    | Inorganic pyrophosphatase<br>Type IV secretory pathway, VirB11 component, or related ATPase involved in archaeal flagella biosynthesis | 15920741  | 50.1 | Crenarchaeota  | Sulfolobus tokodaii str. 7         |
| Acd1_1268  | C2 | arCOG01817 | N | VirB11 | VirB11                                                                                                                                 | 15920739  | 75.5 | Crenarchaeota  | Sulfolobus tokodaii str. 7         |
| Acd1_1269  | C2 | arCOG01808 | N | TadC   | Flp pilus assembly protein TadC                                                                                                        | 15920738  | 53.9 | Crenarchaeota  | Sulfolobus tokodaii str. 7         |
| Acd1_1270  | C2 | arCOG00358 | R | DRG    | Predicted GTPase                                                                                                                       | 15920737  | 189  | Crenarchaeota  | Sulfolobus tokodaii str. 7         |
| Acd1_1271  | C2 | arCOG04113 | L | RnhB   | Ribonuclease HI                                                                                                                        | 227826588 | 46.6 | Crenarchaeota  | Sulfolobus islandicus M.14.25      |
| Acd1_1272  | C2 | arCOG04149 | J | NMD03  | NMD protein affecting ribosome stability and mRNA decay                                                                                | 15920735  | 208  | Crenarchaeota  | Sulfolobus tokodaii str. 7         |
| Acd1_1273  | C2 | arCOG04051 | S | -      | Uncharacterized conserved protein                                                                                                      | 374632055 | 252  | Crenarchaeota  | Metallolphaera yellowstonensis MK1 |
| Acd1_1274  | C2 | arCOG01640 | J | CD7    | Translation initiation factor 2, beta subunit (eIF-2beta)/eIF-5 N-terminal domain                                                      | 15920733  | 337  | Crenarchaeota  | Sulfolobus tokodaii str. 7         |
| Acd1_1275  | C2 | arCOG05954 | S | -      | 2-methylglutathione synthetase                                                                                                         | 385722226 | 124  | Crenarchaeota  | Sulfolobus islandicus HV10/4       |
| Acd1_1276  | C2 | arCOG01282 | I | Psaj   | Acetyl-CoA acetyltransferase                                                                                                           | 15920731  | 124  | Crenarchaeota  | Sulfolobus tokodaii str. 7         |
| Acd1_1277  | C2 | arCOG01179 | J | InfA   | Translation initiation factor 1 (IF-1)                                                                                                 | 20138674  | 903  | Crenarchaeota  | Sulfolobus tokodaii str. 7         |
| Acd1_1278  | C2 | arCOG01280 | T | ROI1   | Senescence protein kinase involved in cell cycle control                                                                               | 342306224 | 523  | Crenarchaeota  | Sulfolobus tokodaii str. 7         |
| Acd1_1279  | C2 | arCOG04150 | R | -      | Predicted RNA-binding protein (contains KH domains)                                                                                    | 15920728  | 247  | Crenarchaeota  | Sulfolobus tokodaii str. 7         |
| Acd1_1280  | C2 | arCOG05954 | S | -      | Predicted RNA-binding protein                                                                                                          | 15920727  | 152  | Crenarchaeota  | Sulfolobus tokodaii str. 7         |
| Acd1_1281  | C2 | arCOG04164 | S | -      | Uncharacterized conserved protein                                                                                                      | 15920720  | 995  | Crenarchaeota  | Sulfolobus islandicus L.S.15       |
| Acd1_1282  | C2 | arCOG05955 | S | -      | Uncharacterized conserved protein                                                                                                      | 15899126  | 214  | Crenarchaeota  | Sulfolobus solfataricus P2         |
| Acd1_1283  | C2 | arCOG05956 | S | -      | Uncharacterized conserved protein                                                                                                      | 70606755  | 134  | Crenarchaeota  | Sulfolobus acidocaldarius DSM 639  |
| Acd1_1284  | C2 | arCOG00606 | E | MetC   | Cystathionine beta-lyase/cystathionine gamma-synthase                                                                                  | 374632075 | 286  | Crenarchaeota  | Metallolphaera yellowstonensis MK1 |
| Acd1_1285  | C2 | arCOG01027 | E | ThrB   | Homoserine kinase                                                                                                                      | 15920722  | 62   | Crenarchaeota  | Sulfolobus tokodaii str. 7         |
| Acd1_1286  | C2 | arCOG03838 | H | PqqD   | Coenzyme PQQ synthesis protein D<br>Single-stranded DNA-binding replication protein A (RPA), large (70 kD)                             | 332797834 | 109  | Crenarchaeota  | Acidianus hospitalis W1            |
| Acd1_1287  | C2 | arCOG01510 | L | RF1    | Uncharacterized protein                                                                                                                | 15920719  | 575  | Crenarchaeota  | Sulfolobus tokodaii str. 7         |
| Acd1_1288  | C2 | arCOG00436 | R | -      | MoxR-like ATPase                                                                                                                       | 332797832 | 415  | Crenarchaeota  | Acidianus hospitalis W1            |
| Acd1_1289  | C2 | arCOG00442 | R | -      | Uncharacterized protein containing a von Willebrand factor type A (VWA) domain                                                         | 146303450 | 116  | Crenarchaeota  | Metallolphaera sedula DSM 5348     |
| Acd1_1290  | C2 | arCOG04221 | G | NagD   | Phosphatase of the HAD superfamily                                                                                                     | 374632080 | 541  | Crenarchaeota  | Metallolphaera yellowstonensis MK1 |
| Acd1_1291  | C2 | arCOG05957 | S | -      | Uncharacterized conserved protein                                                                                                      | 70606768  | 430  | Crenarchaeota  | Sulfolobus acidocaldarius DSM 639  |
| Acd1_1292  | C2 | arCOG04351 | S | -      | Predicted membrane protein                                                                                                             | 70606769  | 495  | Crenarchaeota  | Sulfolobus acidocaldarius DSM 639  |
| Acd1_1293  | C2 | arCOG00570 | C | FixC   | Dehydrogenase (flavoprotein)                                                                                                           | 332797823 | 179  | Crenarchaeota  | Acidianus hospitalis W1            |
| Acd1_1294  | C2 | arCOG05958 | S | -      | Predicted RNA-binding protein                                                                                                          | 146303465 | 562  | Crenarchaeota  | Metallolphaera sedula DSM 5348     |
| Acd1_1295  | C2 | arCOG05958 | S | -      | Predicted ICC-like phosphoesterase                                                                                                     | 227826588 | 945  | Crenarchaeota  | Sulfolobus islandicus M.14.25      |
| Acd1_1296  | C2 | arCOG04779 | E | -      | Asparaginase                                                                                                                           | 70606241  | 55.1 | Crenarchaeota  | Sulfolobus acidocaldarius DSM 639  |
| Acd1_1297  | C2 | arCOG07197 | S | -      | Uncharacterized conserved protein                                                                                                      | 342306213 | 224  | Crenarchaeota  | Sulfolobus tokodaii str. 7         |
| Acd1_1298  | C2 | arCOG00570 | C | FixC   | Dehydrogenase (flavoprotein)                                                                                                           | 70606775  | 291  | Crenarchaeota  | Sulfolobus acidocaldarius DSM 639  |
| Acd1_1299  | C2 | arCOG01580 | K | Lrp    | Transcriptional regulator, lcrR family                                                                                                 | 15920704  | 359  | Crenarchaeota  | Sulfolobus tokodaii str. 7         |
| Acd1_1300  | C2 | arCOG01589 | H | RmkA   | Glutathione synthase [glutathionyl transferase/alpha-L-glutamylase ligase]                                                             | 70606683  | 69.3 | Crenarchaeota  | Sulfolobus islandicus L.D.8.5      |
| Acd1_1301  | C2 | arCOG01727 | H | IspA   | Geranylgeranyl pyrophosphate synthase                                                                                                  | 15920702  | 617  | Crenarchaeota  | Sulfolobus tokodaii str. 7         |
| Acd1_1302  | C2 | arCOG05960 | S | -      | Uncharacterized conserved protein                                                                                                      | 15920701  | 198  | Crenarchaeota  | Sulfolobus tokodaii str. 7         |
| Acd1_1303  | C2 | arCOG01327 | F | Pnp    | Purine nucleoside phosphorylase                                                                                                        | 70606780  | 562  | Crenarchaeota  | Sulfolobus acidocaldarius DSM 639  |
| Acd1_1304  | C2 | arCOG00040 | R | eRF1   | Predicted phosphoribosyltransferase                                                                                                    | 342306210 | 226  | Crenarchaeota  | Sulfolobus tokodaii str. 7         |
| Acd1_1305  | C2 | arCOG01742 | J | -      | Peptide chain release factor 1 (eRF1)                                                                                                  | 15920698  | 299  | Crenarchaeota  | Sulfolobus tokodaii str. 7         |
| Acd1_1306  | C2 | arCOG03694 | S | -      | Uncharacterized conserved protein                                                                                                      | 146304260 | 445  | Crenarchaeota  | Metallolphaera sedula DSM 5348     |
| Acd1_1307  | C2 | arCOG01316 | E | PutP   | Na <sup>+</sup> /proline symporter                                                                                                     | 374633466 | 600  | Crenarchaeota  | Metallolphaera yellowstonensis MK1 |
| Acd1_1308  | C2 | arCOG06048 | S | -      | Uncharacterized conserved protein                                                                                                      | 227828973 | 295  | Crenarchaeota  | Sulfolobus islandicus M.14.25      |
| trNALeuTAG | C2 | -          | - | -      | trNALeuTAG                                                                                                                             | -         | -    | -              | -                                  |
| Acd1_1309  | C2 | arCOG04308 | S | -      | Uncharacterized conserved protein                                                                                                      | 15920674  | 136  | Crenarchaeota  | Sulfolobus tokodaii str. 7         |
| Acd1_1310  | C2 | arCOG00578 | R | -      | Uncharacterized Zn-finger containing protein                                                                                           | 15920676  | 453  | Crenarchaeota  | Sulfolobus tokodaii str. 7         |
| Acd1_1311  | C2 | arCOG01891 | F | Tmk    | Thymidylate kinase                                                                                                                     | 284175009 | 179  | Crenarchaeota  | Sulfolobus solfataricus 98/2       |
| Acd1_1312  | C2 | arCOG04127 | R | -      | Predicted GTPase or GTP-binding protein                                                                                                | 284175008 | 147  | Crenarchaeota  | Sulfolobus solfataricus 98/2       |
| Acd1_1313  | C2 | arCOG03142 | S | -      | Uncharacterized conserved protein                                                                                                      | 70606681  | 342  | Crenarchaeota  | Sulfolobus acidocaldarius DSM 639  |
| Acd1_1314  | C2 | arCOG00417 | L | RecA   | RecA/RadA recombinase                                                                                                                  | 284997756 | 427  | Crenarchaeota  | Sulfolobus islandicus L.D.8.5      |
| Acd1_1315  | C2 | arCOG04106 | I | CdsA   | CDP-diglyceride synthetase                                                                                                             | 70606683  | 435  | Crenarchaeota  | Sulfolobus acidocaldarius DSM 639  |
| Acd1_1316  | C2 | arCOG07194 | S | -      | Uncharacterized conserved protein                                                                                                      | 15920682  | 173  | Crenarchaeota  | Sulfolobus tokodaii str. 7         |
| Acd1_1317  | C2 | arCOG04059 | S | -      | Uncharacterized conserved protein                                                                                                      | 70606685  | 74.3 | Crenarchaeota  | Sulfolobus acidocaldarius DSM 639  |
| Acd1_1318  | C2 | arCOG00439 | L | MCM2   | Predicted ATPase involved in replication control, Cdc46/Mcm family                                                                     | 342306205 | 338  | Crenarchaeota  | Sulfolobus tokodaii str. 7         |
| Acd1_1319  | C2 | arCOG00552 | L | -      | DNA replication initiation complex subunit, GIN23 family                                                                               | 15920685  | 192  | Crenarchaeota  | Sulfolobus tokodaii str. 7         |
| Acd1_1320  | C2 | arCOG00084 | R | -      | Predicted RNA-binding protein, contains THUMP domain                                                                                   | 70606688  | 95.5 | Crenarchaeota  | Sulfolobus acidocaldarius DSM 639  |
| Acd1_1321  | C2 | arCOG00472 | R | CDC6   | Cdc6-related protein, AAA superfamily ATPase                                                                                           | 15920687  | 655  | Crenarchaeota  | Sulfolobus tokodaii str. 7         |
| Acd1_1322  | C2 | arCOG01667 | L | -      | Uncharacterized protein                                                                                                                | 256391161 | 79.7 | Actinobacteria | Catenulispora acidiphila DSM 44928 |
| Acd1_1323  | C2 | arCOG01530 | H | MoaC   | Molybdenum cofactor biosynthesis enzyme                                                                                                | 374633942 | 122  | Crenarchaeota  | Metallolphaera yellowstonensis MK1 |
| Acd1_1324  | C2 | arCOG00470 | L | HolB   | ATPase involved in DNA replication HolB, large subunit                                                                                 | 42559517  | 226  | Crenarchaeota  | Sulfolobus tokodaii str. 7         |
| Acd1_1325  | C2 | arCOG00469 | L | HolB   | ATPase involved in DNA replication HolB, small subunit                                                                                 | 15920690  | 1107 | Crenarchaeota  | Sulfolobus tokodaii str. 7         |
| Acd1_1326  | C2 | arCOG04702 | R | -      | Phospholipid-binding protein                                                                                                           | 227830343 | 114  | Crenarchaeota  | Sulfolobus islandicus L.S.2.15     |
| Acd1_1327  | C2 | arCOG00970 |   |        |                                                                                                                                        |           |      |                |                                    |



|           |    |            |    |       |                                                                                                                 |           |      |                              |                                                |
|-----------|----|------------|----|-------|-----------------------------------------------------------------------------------------------------------------|-----------|------|------------------------------|------------------------------------------------|
| Acd1_1343 | C2 | arCOG0138  | G  | ProP  | Permease of the major facilitator superfamily                                                                   | 15899717  | 70.5 | Crenarchaeota                | Sulfolobus solfataricus P2                     |
| Acd1_1344 | C2 | arCOG0320  | R  | -     | Predicted membrane-bound metal-dependent hydrolase                                                              | 229584225 | 471  | Crenarchaeota                | Sulfolobus islandicus M.16.27                  |
| Acd1_1345 | C2 | arCOG02683 | G  | ProP  | Permease of the major facilitator superfamily                                                                   | 15920919  | 35.4 | Crenarchaeota                | Sulfolobus tokodaii str. 7                     |
| Acd1_1346 | C2 | arCOG02215 | S  | -     | Uncharacterized conserved protein                                                                               | 15922817  | 555  | Crenarchaeota                | Sulfolobus tokodaii str. 7                     |
| Acd1_1347 | C2 | arCOG01065 | R  | HcaD  | NAD(PAD)-dependent dehydrogenase                                                                                | 15922815  | 313  | Crenarchaeota                | Sulfolobus tokodaii str. 7                     |
| Acd1_1348 | C2 | arCOG03465 | E  | PotE  | Amino acid transporter                                                                                          | 15922813  | 600  | Crenarchaeota                | Sulfolobus tokodaii str. 7                     |
| Acd1_1349 | C2 | arCOG01302 | S  | -     | Uncharacterized conserved protein                                                                               | 22782856  | 707  | Crenarchaeota                | Sulfolobus islandicus M.14.25                  |
| Acd1_1350 | C2 | arCOG01167 | C  | CoxL  | Aerobic-type carbon monoxide dehydrogenase, large subunit CoxL/CutL homolog                                     | 15922814  | 372  | Crenarchaeota                | Sulfolobus tokodaii str. 7                     |
| Acd1_1351 | C2 | arCOG01482 | H  | NadC  | Nicotinate-nucleotide pyrophosphorylase                                                                         | 15921461  | 196  | Crenarchaeota                | Sulfolobus tokodaii str. 7                     |
| Acd1_1352 | C2 | arCOG00572 | H  | NadB  | Aspartate oxidase                                                                                               | 32797910  | 114  | Crenarchaeota                | Acidianus hospitalis W1                        |
| Acd1_1353 | C2 | arCOG04559 | H  | NadA  | Quinolinate synthase                                                                                            | 363548443 | 115  | Crenarchaeota                | Sulfolobus tokodaii str. 7                     |
| Acd1_1354 | C2 | arCOG03671 | E  | -     | Thermopsin-like protease                                                                                        | 15922807  | 221  | Crenarchaeota                | Sulfolobus tokodaii str. 7                     |
| Acd1_1355 | C2 | arCOG03861 | S  | -     | Uncharacterized conserved protein                                                                               | 146303446 | 177  | Crenarchaeota                | Metallorhodospira sedula DSM 5348              |
| Acd1_1356 | C2 | arCOG09608 | R  | -     | Predicted metal permease                                                                                        | 352682566 | 559  | Crenarchaeota                | Thermoproteus tenax Kra 1                      |
| Acd1_1357 | C2 | -          | -  | -     | Uncharacterized protein                                                                                         | -         | -    | -                            | -                                              |
| Acd1_1358 | C2 | arCOG08324 | S  | -     | Uncharacterized conserved protein                                                                               | 374634157 | 420  | Crenarchaeota                | Metallorhodospira yellowstonensis MK1          |
| Acd1_1359 | C2 | arCOG07731 | S  | -     | Uncharacterized conserved protein                                                                               | 15922804  | 272  | Crenarchaeota                | Sulfolobus tokodaii str. 7                     |
| Acd1_1360 | C2 | arCOG01916 | V  | CcmA  | ABC-type multidrug transport system, ATPase component                                                           | 332797692 | 265  | Crenarchaeota                | Acidianus hospitalis W1                        |
| Acd1_1361 | C2 | arCOG01491 | C  | BisC  | Anaerobic dehydrogenase                                                                                         | 15920859  | 196  | Crenarchaeota                | Sulfolobus tokodaii str. 7                     |
| Acd1_1362 | C2 | arCOG01920 | O  | XdhC  | Xanthine and CO dehydrogenase maturation factor, XdhC/CoxF family                                               | 229581025 | 185  | Crenarchaeota                | Sulfolobus islandicus Y.N.15.51                |
| Acd1_1363 | C2 | arCOG00972 | H  | NadR  | Nicotinamide mononucleotide adenylyltransferase                                                                 | 70606139  | 412  | Crenarchaeota                | Sulfolobus acidocaldarius DSM 639              |
| Acd1_1364 | C2 | arCOG08315 | S  | -     | Uncharacterized conserved protein                                                                               | 227828967 | 603  | Crenarchaeota                | Sulfolobus islandicus M.14.25                  |
| Acd1_1365 | C2 | arCOG04053 | E  | Ggt   | Gamma-glutamyltransferase                                                                                       | 15922886  | 154  | Crenarchaeota                | Sulfolobus tokodaii str. 7                     |
| Acd1_1366 | C2 | arCOG03562 | S  | POT E | Amino acid transporter                                                                                          | 15922892  | 532  | Crenarchaeota                | Sulfolobus tokodaii str. 7                     |
| Acd1_1367 | C2 | arCOG05926 | S  | -     | Uncharacterized conserved protein                                                                               | 15899980  | 42.7 | Crenarchaeota                | Sulfolobus solfataricus P2                     |
| Acd1_1368 | C2 | arCOG01951 | R  | -     | Predicted P-loop ATPase fused to an acetyltransferase                                                           | 15922689  | 132  | Crenarchaeota                | Sulfolobus tokodaii str. 7                     |
| Acd1_1369 | C2 | arCOG01084 | R  | MazG  | Predicted pyrophosphatase                                                                                       | 284175864 | 635  | Crenarchaeota                | Sulfolobus solfataricus 98/2                   |
| Acd1_1370 | C2 | arCOG05925 | S  | -     | Uncharacterized conserved protein                                                                               | 15922687  | 912  | Crenarchaeota                | Sulfolobus tokodaii str. 7                     |
| Acd1_1371 | C2 | -          | -  | -     | Uncharacterized protein                                                                                         | -         | -    | -                            | -                                              |
| Acd1_1372 | C2 | arCOG02659 | G  | -     | Predicted N-acetylglucosaminidase                                                                               | 70606260  | 365  | Crenarchaeota                | Sulfolobus acidocaldarius DSM 639              |
| Acd1_1373 | C2 | arCOG00664 | M  | RfbA  | dTDP-glucose pyrophosphorylase                                                                                  | 15922683  | 320  | Crenarchaeota                | Sulfolobus tokodaii str. 7                     |
| Acd1_1374 | C2 | arCOG00561 | O  | -     | Predicted membrane-bound dolichyl-phosphate-mannose-protein mannosyltransferase                                 | 15922682  | 100  | Crenarchaeota                | Sulfolobus tokodaii str. 7                     |
| Acd1_1375 | C2 | arCOG04044 | E  | -     | 2-amino-3,7-dideoxy-D-threo-hept-6-ulononic acid synthase, Dhna-aldolase family                                 | 15922681  | 132  | Crenarchaeota                | Sulfolobus tokodaii str. 7                     |
| Acd1_1376 | C2 | arCOG03654 | E  | PotE  | Amino acid transporter                                                                                          | 327310005 | 998  | Crenarchaeota                | Thermoproteus uzoniensis 768-20                |
| Acd1_1377 | C2 | arCOG01068 | C  | Lpd   | Pyruvate/2-oxoglutarate dehydrogenase complex, dihydriolipoamide dehydrogenase (E3) component or related enzyme | 15922178  | 30.8 | Crenarchaeota                | Sulfolobus tokodaii str. 7                     |
| Acd1_1378 | C2 | -          | -  | -     | Uncharacterized protein                                                                                         | 313206167 | 57.8 | Bacteroidetes/Chlorobi group | Riemerella anatipetifer ATCC 11845 = DSM 15868 |
| Acd1_1379 | C2 | arCOG03851 | S  | -     | Uncharacterized conserved protein                                                                               | 146304946 | 512  | Crenarchaeota                | Metallorhodospira sedula DSM 5348              |
| Acd1_1380 | C2 | arCOG00975 | J  | Sun   | tRNA or rRNA cytosine-C5-methylase                                                                              | 15922756  | 432  | Crenarchaeota                | Sulfolobus tokodaii str. 7                     |
| Acd1_1381 | C2 | arCOG02881 | P  | ECM27 | Ca <sup>2+</sup> /Na <sup>+</sup> antiporter                                                                    | 229582403 | 617  | Crenarchaeota                | Sulfolobus islandicus Y.N.15.51                |
| Acd1_1382 | C2 | -          | -  | -     | Uncharacterized protein                                                                                         | 15922523  | 327  | Crenarchaeota                | Sulfolobus tokodaii str. 7                     |
| Acd1_1383 | C2 | -          | -  | -     | Uncharacterized protein                                                                                         | -         | -    | -                            | -                                              |
| Acd1_1384 | C2 | arCOG02441 | R  | NusY  | ABC-type transport system involved in multi-copper enzyme maturation, permease component                        | 70605713  | 258  | Crenarchaeota                | Sulfolobus acidocaldarius DSM 639              |
| Acd1_1385 | C2 | arCOG00194 | V  | CcmA  | ABC-type multidrug transport system, ATPase component                                                           | 332797654 | 541  | Crenarchaeota                | Acidianus hospitalis W1                        |
| Acd1_1386 | C2 | arCOG01167 | C  | CoxL  | Aerobic-type carbon monoxide dehydrogenase, large subunit CoxL/CutL homolog                                     | 15920967  | 262  | Crenarchaeota                | Sulfolobus tokodaii str. 7                     |
| Acd1_1387 | C2 | arCOG06001 | R  | -     | Predicted periplasmic protein                                                                                   | 15899878  | 29.6 | Crenarchaeota                | Sulfolobus solfataricus P2                     |
| Acd1_1388 | C2 | arCOG01606 | C  | PorA  | Pyruvate:ferredoxin oxidoreductase or related 2-oxoacid:ferredoxin oxidoreductase, alpha subunit and gamma      | 15922767  | 228  | Crenarchaeota                | Sulfolobus tokodaii str. 7                     |
| Acd1_1389 | C2 | arCOG01599 | C  | PorB  | Pyruvate:ferredoxin oxidoreductase or related 2-oxoacid:ferredoxin oxidoreductase, beta subunit                 | 15922765  | 138  | Crenarchaeota                | Sulfolobus tokodaii str. 7                     |
| Acd1_1390 | C2 | arCOG03879 | K  | -     | Predicted transcriptional regulator                                                                             | 70608017  | 233  | Crenarchaeota                | Sulfolobus acidocaldarius DSM 639              |
| Acd1_1391 | C2 | -          | -  | -     | Uncharacterized protein                                                                                         | -         | -    | -                            | -                                              |
| Acd1_1392 | C2 | arCOG05913 | S  | -     | Uncharacterized conserved protein                                                                               | 332795709 | 268  | Crenarchaeota                | Acidianus hospitalis W1                        |
| Acd1_1393 | C2 | arCOG05710 | S  | -     | Uncharacterized conserved protein                                                                               | 15898755  | 90.1 | Crenarchaeota                | Sulfolobus solfataricus P2                     |
| Acd1_1394 | C2 | arCOG01918 | O  | HIC   | Membrane protease subunit, stomatin/prohibitin homolog                                                          | 70607478  | 164  | Crenarchaeota                | Sulfolobus acidocaldarius DSM 639              |
| Acd1_1395 | C2 | arCOG06007 | S  | -     | Uncharacterized conserved protein                                                                               | 70607477  | 102  | Crenarchaeota                | Sulfolobus acidocaldarius DSM 639              |
| Acd1_1396 | C2 | -          | -  | -     | Uncharacterized protein                                                                                         | -         | -    | -                            | -                                              |
| Acd1_1397 | C2 | arCOG01187 | O  | HypF  | Hydrogenase maturation factor                                                                                   | 385772914 | 54.7 | Crenarchaeota                | Sulfolobus islandicus HVE10/4                  |
| Acd1_1398 | C2 | arCOG03778 | E  | -     | Uncharacterized conserved protein                                                                               | 15922754  | 47   | Crenarchaeota                | Sulfolobus tokodaii str. 7                     |
| Acd1_1399 | C2 | arCOG06035 | S  | -     | Uncharacterized conserved protein                                                                               | 332797308 | 533  | Crenarchaeota                | Acidianus hospitalis W1                        |
| Acd1_1400 | C2 | -          | -  | -     | Uncharacterized protein                                                                                         | 126459618 | 210  | Crenarchaeota                | Pyrobaculum caldifontis JCM 11548              |
| Acd1_1401 | C2 | arCOG04480 | K  | AbrB  | Transcriptional regulator AbrB                                                                                  | 227831197 | 94   | Crenarchaeota                | Sulfolobus islandicus L.S.2.15                 |
| Acd1_1402 | C2 | arCOG00715 | S  | -     | PH domain containing protein                                                                                    | 227831196 | 95.6 | Crenarchaeota                | Sulfolobus islandicus L.S.2.15                 |
| Acd1_1403 | C2 | arCOG05023 | V  | HotW  | High-affinity nickel permease                                                                                   | 32732060  | 67   | Crenarchaeota                | Thermoproteus uzoniensis 768-20                |
| Acd1_1404 | C2 | arCOG10002 | S  | -     | Uncharacterized conserved protein                                                                               | 332797211 | 144  | Crenarchaeota                | Acidianus hospitalis W1                        |
| Acd1_1405 | C2 | arCOG01663 | K  | RelE  | Cytotoxic translational repressor of toxin-antitoxin stability system                                           | 284997851 | 232  | Crenarchaeota                | Sulfolobus islandicus L.D.8.5                  |
| Acd1_1406 | C2 | arCOG07934 | S  | -     | Uncharacterized protein                                                                                         | 15921577  | 249  | Crenarchaeota                | Sulfolobus tokodaii str. 7                     |
| Acd1_1407 | C2 | -          | -  | -     | Uncharacterized protein                                                                                         | -         | -    | -                            | -                                              |
| Acd1_1408 | C2 | arCOG00143 | G  | ProP  | Permease of the major facilitator superfamily                                                                   | 22782647  | 1224 | Crenarchaeota                | Sulfolobus islandicus M.14.25                  |
| Acd1_1409 | C2 | arCOG06023 | P  | HotW  | High-affinity nickel permease                                                                                   | 32732060  | 70.9 | Crenarchaeota                | Thermoproteus uzoniensis 768-20                |
| Acd1_1410 | C3 | arCOG01446 | K  | ArsR  | Transcriptional regulator containing HTH domain, ArsR family                                                    | 385727263 | 296  | Crenarchaeota                | Sulfolobus islandicus HVE10/4                  |
| Acd1_1411 | C3 | arCOG00823 | P  | AbrB  | Transcriptional regulator AbrB                                                                                  | 332796045 | 109  | Crenarchaeota                | Acidianus hospitalis W1                        |
| Acd1_1412 | C3 | arCOG03672 | E  | -     | Thermopsin-like protease                                                                                        | 332795892 | 586  | Crenarchaeota                | Acidianus hospitalis W1                        |
| Acd1_1413 | C3 | arCOG01204 | R  | -     | Minimal nucleotidyltransferase                                                                                  | 227826731 | 793  | Crenarchaeota                | Sulfolobus islandicus M.14.25                  |
| Acd1_1414 | C3 | arCOG01573 | M  | MscS  | Small-conductance mechanosensitive channel                                                                      | 37462213  | 221  | Crenarchaeota                | Metallorhodospira yellowstonensis MK1          |
| Acd1_1415 | C3 | arCOG03672 | E  | -     | Thermopsin-like protease                                                                                        | 38572646  | 275  | Crenarchaeota                | Sulfolobus islandicus HVE10/4                  |
| Acd1_1416 | C3 | arCOG03712 | R  | -     | HEPN domain                                                                                                     | 332797704 | 221  | Crenarchaeota                | Acidianus hospitalis W1                        |
| Acd1_1417 | C3 | arCOG03167 | R  | -     | Predicted ATPase (AAA+ superfamily)                                                                             | 332796111 | 27.8 | Crenarchaeota                | Acidianus hospitalis W1                        |
| Acd1_1418 | C3 | arCOG06034 | S  | -     | Uncharacterized conserved protein                                                                               | 15922700  | 2182 | Crenarchaeota                | Sulfolobus tokodaii str. 7                     |
| Acd1_1419 | C3 | arCOG03463 | C  | -     | Fe-S oxidoreductase                                                                                             | 15899949  | 51.6 | Crenarchaeota                | Sulfolobus solfataricus P2                     |
| Acd1_1420 | C3 | arCOG01097 | C  | GlpC  | Rubredoxin                                                                                                      | 15899968  | 638  | Crenarchaeota                | Sulfolobus solfataricus P2                     |
| Acd1_1421 | C3 | arCOG05713 | VL | -     | McrBC 5-methylcytosine restriction system component                                                             | 229579809 | 141  | Crenarchaeota                | Sulfolobus islandicus Y.G.57.14                |
| Acd1_1422 | C3 | arCOG03779 | V  | -     | GTPase subunit of restriction endonuclease                                                                      | 229579810 | 335  | Crenarchaeota                | Sulfolobus islandicus Y.G.57.14                |
| Acd1_1423 | C3 | arCOG00579 | K  | RPB9  | DNA-directed RNA polymerase, subunit M/Transcription elongation factor TFIIS                                    | 332795967 | 374  | Crenarchaeota                | Acidianus hospitalis W1                        |
| Acd1_1424 | C3 | arCOG01357 | C  | -     | Radical SAM superfamily enzyme                                                                                  | 146303676 | 31.2 | Crenarchaeota                | Metallorhodospira sedula DSM 5348              |
| Acd1_1425 | C3 | arCOG04641 | S  | -     | Predicted membrane protein                                                                                      | 332797719 | 595  | Crenarchaeota                | Acidianus hospitalis W1                        |
| Acd1_1426 | C3 | arCOG01367 | M  | RfbD  | dTDP-4-dehydroxymannose reductase                                                                               | 332795820 | 196  | Crenarchaeota                | Acidianus hospitalis W1                        |
| Acd1_1427 | C3 | arCOG08305 | S  | -     | Uncharacterized conserved protein                                                                               | 385776201 | 43.1 | Crenarchaeota                | Sulfolobus islandicus REY15A                   |
| Acd1_1428 | C3 | -          | -  | -     | Uncharacterized protein                                                                                         | 374631976 | 42.4 | Crenarchaeota                | Metallorhodospira yellowstonensis MK1          |
| Acd1_1429 | C3 | -          | -  | -     | Uncharacterized protein                                                                                         | 315231869 | 42.4 | Euryarchaeota                | Thermococcus barophilus MP                     |
| Acd1_1430 | C3 | arCOG02782 | V  | -     | Endonuclease, HIR/Mrr/RecB family                                                                               | 145591469 | 315  | Crenarchaeota                | Pyrobaculum arsenatum DSM 13514                |
| Acd1_1431 | C3 | arCOG01491 | C  | BisC  | Anaerobic dehydrogenase                                                                                         | 332797254 | 371  | Crenarchaeota                | Acidianus hospitalis W1                        |
| Acd1_1432 | C3 | arCOG06016 | C  | CbsB  | Cytochrome b558/566, subunit B                                                                                  | 374632362 | 76.6 | Crenarchaeota                | Metallorhodospira yellowstonensis MK1          |
| Acd1_1433 | C3 | arCOG06015 | C  | CbsA  | Cytochrome b558/566, subunit A                                                                                  | 15921967  | 121  | Crenarchaeota                | Sulfolobus tokodaii str. 7                     |
| Acd1_1434 | C3 | -          | -  | -     | Uncharacterized protein                                                                                         | 159042150 | 99.8 | Crenarchaeota                | Caldwriga maquilingensis IC-167                |
| Acd1_1435 | C3 | arCOG03721 | R  | -     | HEPN domain                                                                                                     | 332795970 | 260  | Crenarchaeota                | Acidianus hospitalis W1                        |
| Acd1_1436 | C3 | arCOG03721 | R  | -     | HEPN domain                                                                                                     | 332795969 | 112  | Crenarchaeota                | Acidianus hospitalis W1                        |
| Acd1_1437 | C3 | arCOG01191 | V  | -     | HEPN domain containing protein                                                                                  | 332797208 | 625  | Crenarchaeota                | Acidianus hospitalis W1                        |
| Acd1_1438 | C3 | arCOG07292 | R  | -     | Minimal nucleotidyltransferase                                                                                  | 332797209 | 219  | Crenarchaeota                | Acidianus hospitalis W1                        |
| Acd1_1439 | C3 | arCOG03169 | R  | -     | Predicted ATPase (AAA+ superfamily)                                                                             | 302348489 | 460  | Crenarchaeota                | Acidilobus saccharovorans 345-15               |
| Acd1_1440 | C3 | arCOG07305 | S  | -     | Uncharacterized conserved protein                                                                               | 332797237 | 187  | Crenarchaeota                | Acidianus hospitalis W1                        |
| Acd1_1441 | C3 | arCOG06017 | S  | -     | Uncharacterized conserved protein                                                                               | 15921966  | 378  | Crenarchaeota                | Sulfolobus tokodaii str. 7                     |
| Acd1_1442 | C3 | arCOG01720 | C  | SoxL  | Rieske Fe-S protein                                                                                             | 374632363 | 857  | Crenarchaeota                | Metallorhodospira yellowstonensis MK1          |
| Acd1_1443 | C3 | arCOG01721 | C  | SoxN  | Cytochrome b subunit of the bc complex                                                                          | 146303284 | 128  | Crenarchaeota                | Metallorhodospira sedula DSM 5348              |
| Acd1_1444 | C3 | arCOG05403 | R  | OdsN  | Predicted heme-degrading monooxygenase                                                                          | 146303283 | 260  | Crenarchaeota                | Metallorhodospira sedula DSM 5348              |
| Acd1_1445 | C3 | arCOG03164 | L  | -     | Predicted site-specific integrase-resolvase                                                                     | 229578503 | 89.7 | Crenarchaeota                | Sulfolobus islandicus Y.G.57.14                |
| Acd1_1446 | C3 | -          | -  | -     | Uncharacterized protein                                                                                         | -         | -    | -                            | -                                              |
| Acd1_1447 | C3 | arCOG01123 | J  | -     | Translation initiation factor eIF-28 alpha subunit                                                              | 15921156  | 66.6 | Crenarchaeota                | Sulfolobus tokodaii str. 7                     |
| Acd1_1448 | C3 | arCOG05396 | S  | -     | Predicted membrane protein                                                                                      | 15896986  | 763  | Crenarchaeota                | Sulfolobus solfataricus P2                     |
| Acd1_1449 | C3 | arCOG02050 | R  | -     | Predicted permease                                                                                              | 227828357 | 246  | Crenarchaeota                | Sulfolobus islandicus M.14.25                  |
| Acd1_1450 | C3 | arCOG04291 | S  | -     | Uncharacterized conserved protein                                                                               | 332796127 | 215  | Crenarchaeota                | Acidianus hospitalis W1                        |
| Acd1_1451 | C3 | arCOG01420 | G  | GlgA  | Glycogen synthase                                                                                               | 15921053  | 901  | Crenarchaeota                | Sulfolobus tokodaii str. 7                     |
| Acd1_1452 | C3 | arCOG05922 | S  | -     | Uncharacterized conserved protein                                                                               | 15920857  | 108  | Crenarchaeota                | Sulfolobus tokodaii str. 7                     |
| Acd1_1453 | C3 | -          | -  | -     | Uncharacterized protein                                                                                         | -         | -    | -                            | -                                              |
| Acd1_1454 | C3 | arCOG02702 | Q  | -     | SAM-dependent methyltransferase                                                                                 | 106399797 | 312  | Euryarchaeota                | Thermoplasma acidophilum                       |
| Acd1_1455 | C3 | -          | -  | -     | Uncharacterized protein                                                                                         | 227828621 | 170  | Crenarchaeota                | Sulfolobus islandicus M.14.25                  |
| Acd1_1456 | C3 | arCOG03682 | R  | SPS1  | Membrane associated serine/threonine protein kinase                                                             | 15921012  | 210  | Crenarchaeota                | Sulfolobus tokodaii str. 7                     |
| Acd1_1457 | C3 | arCOG00967 | J  | -     | tRNA m <sup>1</sup> G methyltransferase                                                                         | 15921088  | 796  | Crenarchaeota                | Sulfolobus tokodaii str. 7                     |
| Acd1_1458 | C3 | arCOG00130 | G  | ProP  | Permease of the major facilitator superfamily                                                                   | 229582368 | 449  | Crenarchaeota                | Sulfolobus islandicus Y.N.15.51                |
| Acd1_1459 | C3 | arCOG00223 | J  | ModE  | N-terminal domain of molybdenum-binding protein                                                                 | 70609662  | 178  | Crenarchaeota                | Sulfolobus acidocaldarius DSM 639              |
| Acd1_1460 | C3 | arCOG03038 | R  | NRG   | TPR repeats containing protein                                                                                  | 15921045  | 418  | Crenarchaeota                | Sulfolobus tokodaii str.                       |

|           |    |            |   |        |                                                                                         |           |      |                |                                      |
|-----------|----|------------|---|--------|-----------------------------------------------------------------------------------------|-----------|------|----------------|--------------------------------------|
| Acd1_1471 | C3 | arCOG01110 | E | ArgE   | Acetylornithine deacetylase/Succinyl-diaminopimelate desuccinylase or related deacylase | 15920847  | 196  | Crenarchaeota  | Sulfolobus tokodaii str. 7           |
| Acd1_1472 | C3 | arCOG03861 | S |        | Uncharacterized conserved protein                                                       | 14630346  | 728  | Crenarchaeota  | Metallolobus sedula DSM 5348         |
| Acd1_1473 | C3 | arCOG00082 | E |        | Serine-pyruvate aminotransferase/archaeal aspartate aminotransferase                    | 15920822  | 769  | Crenarchaeota  | Sulfolobus tokodaii str. 7           |
| Acd1_1474 | C3 |            | S |        | Uncharacterized protein                                                                 |           |      |                |                                      |
| Acd1_1475 | C3 | arCOG06662 | R |        | Biotin synthase-related enzyme                                                          | 146304273 | 214  | Crenarchaeota  | Metallolobus sedula DSM 5348         |
| Acd1_1476 | C3 | arCOG05825 | R |        | Radical SAM superfamily enzyme                                                          | 146304272 | 325  | Crenarchaeota  | Metallolobus sedula DSM 5348         |
| Acd1_1477 | C3 | arCOG01939 | H | LplA   | Lipoate-protein ligase A                                                                | 374633478 | 353  | Crenarchaeota  | Metallolobus yellowstonensis MK1     |
| Acd1_1478 | C3 | arCOG03837 | H |        | Lipoate-protein ligase A associated domain                                              | 374633477 | 340  | Crenarchaeota  | Metallolobus yellowstonensis MK1     |
| Acd1_1479 | C3 | arCOG02727 | R |        | Predicted RNA-binding protein containing PUA-domain                                     | 47117615  | 448  | Crenarchaeota  | Sulfolobus solfataricus P2           |
| Acd1_1480 | C3 |            | S |        | Uncharacterized protein                                                                 | 70606232  | 53.9 | Crenarchaeota  | Sulfolobus acidocaldarius DSM 639    |
| Acd1_1481 | C3 | arCOG02159 | S |        | Predicted membrane protein                                                              | 332795733 | 322  | Crenarchaeota  | Acidianus hospitalis W1              |
| Acd1_1482 | C3 | arCOG01871 | H |        | GTP-adenosylcobinamide-phosphate guanylyltransferase                                    | 70606230  | 191  | Crenarchaeota  | Sulfolobus acidocaldarius DSM 639    |
| Acd1_1483 | C3 | arCOG00194 | V | CcmA   | ABC-type multidrug transport system, ATPase component                                   | 15920828  | 286  | Crenarchaeota  | Sulfolobus tokodaii str. 7           |
| Acd1_1484 | C3 | arCOG01463 | V |        | ABC-type multidrug transport system, permease component                                 | 70606227  | 340  | Crenarchaeota  | Sulfolobus acidocaldarius DSM 639    |
| Acd1_1485 | C3 | arCOG00242 | I | CaIA   | Enoyl-CoA hydratase/carnitine racemase                                                  | 15920830  | 317  | Crenarchaeota  | Sulfolobus tokodaii str. 7           |
| Acd1_1486 | C3 | arCOG02047 | I | MmsB   | 3-hydroxyisobutyrate dehydrogenase or related beta-hydroxyacid dehydrogenase            | 15920839  | 407  | Crenarchaeota  | Sulfolobus tokodaii str. 7           |
| Acd1_1487 | C3 | arCOG01320 | H | RibB   | 3,4-dihydroxy-2-butanone 4-phosphate synthase                                           | 70606612  | 358  | Crenarchaeota  | Sulfolobus acidocaldarius DSM 639    |
| Acd1_1488 | C3 | arCOG01322 | H |        | Riboflavin synthetase                                                                   | 70606611  | 200  | Crenarchaeota  | Sulfolobus acidocaldarius DSM 639    |
| Acd1_1489 | C3 | arCOG01323 | H | RibH   | Riboflavin synthase beta-chain                                                          | 70606610  | 101  | Crenarchaeota  | Sulfolobus acidocaldarius DSM 639    |
| Acd1_1490 | C3 | arCOG04202 | F |        | Archaeal GTP cyclohydrolase III                                                         | 70606609  | 130  | Crenarchaeota  | Sulfolobus acidocaldarius DSM 639    |
| Acd1_1491 | C3 | arCOG06062 | F | SunA   | Cytosine deaminase or related metal-dependent hydrolase                                 | 70606608  | 228  | Crenarchaeota  | Sulfolobus acidocaldarius DSM 639    |
| Acd1_1492 | C3 | arCOG04536 | H |        | Fe <sup>2+</sup> dependent formate hydroxylase, cofactor Fo biosynthesis enzyme         | 70605987  | 306  | Crenarchaeota  | Sulfolobus acidocaldarius DSM 639    |
| Acd1_1493 | C3 | arCOG01484 | S | RibD   | Pyrimidine reductase, riboflavin biosynthesis                                           | 374631083 | 211  | Crenarchaeota  | Metallolobus yellowstonensis MK1     |
| Acd1_1494 | C3 |            | S |        | Uncharacterized protein                                                                 | 374631084 | 379  | Crenarchaeota  | Metallolobus yellowstonensis MK1     |
| Acd1_1495 | C3 | arCOG03233 | R |        | Predicted ATPase                                                                        | 15920840  | 112  | Crenarchaeota  | Sulfolobus tokodaii str. 7           |
| Acd1_1496 | C3 | arCOG05495 | S |        | Uncharacterized conserved protein, contains N-terminal coiled-coil domain               | 229579620 | 219  | Crenarchaeota  | Sulfolobus islandicus Y.G.57.14      |
| Acd1_1497 | C3 |            | S |        | Uncharacterized protein                                                                 | 118431776 | 268  | Crenarchaeota  | Aeropyrum pernix K1                  |
| Acd1_1501 | C3 | arCOG04006 | J | AsnS   | Aspartyl/asparaginyl-tRNA synthetase                                                    | 22529527  | 307  | Crenarchaeota  | Sulfolobus islandicus L.S.2.15       |
| Acd1_1507 | C3 | arCOG00831 | K | AbrB   | Transcriptional regulator AbrB                                                          | 332795954 | 162  | Crenarchaeota  | Acidianus hospitalis W1              |
| Acd1_1503 | C3 | arCOG02221 | V |        | PIN domain containing protein                                                           | 315426687 | 311  | Thaumarchaeota | Candidatus Caldarchaeum subterraneum |
| Acd1_1504 | C3 | arCOG00934 | C | PIIX   | Radical SAM superfamily enzyme                                                          |           |      |                |                                      |
| Acd1_1505 | C3 |            | S |        | Uncharacterized protein                                                                 |           |      |                |                                      |
| Acd1_1506 | C3 | arCOG04294 | L | RecA   | RecA/RadA recombinase                                                                   | 146304210 | 170  | Crenarchaeota  | Metallolobus sedula DSM 5348         |
| Acd1_1507 | C3 | arCOG00329 | P | PolB   | DNA polymerase elongation subunit (family B), inactivated                               | 332796028 | 561  | Crenarchaeota  | Acidianus hospitalis W1              |
| Acd1_1508 | C3 |            | S |        | Uncharacterized protein                                                                 | 374633403 | 85.9 | Crenarchaeota  | Metallolobus yellowstonensis MK1     |
| Acd1_1509 | C3 | arCOG04507 | Q |        | Methane/Pheno/Toluene Hydroxylase component                                             | 374632693 | 63.5 | Crenarchaeota  | Metallolobus yellowstonensis MK1     |
| Acd1_1510 | C3 | arCOG02763 | P |        | Heavy-metal-associated domain (HMA)                                                     | 374631718 | 414  | Crenarchaeota  | Metallolobus yellowstonensis MK1     |
| Acd1_1511 | C3 |            | S |        | Uncharacterized protein                                                                 |           |      |                |                                      |
| Acd1_1512 | C3 | arCOG01953 | P | KeFB   | KeF-type K+ transport system, membrane component                                        | 385773051 | 291  | Crenarchaeota  | Sulfolobus islandicus HVE10/4        |
| Acd1_1513 | C3 | arCOG03169 | S |        | Predicted ATPase (AAA+ superfamily)                                                     | 332796072 | 416  | Crenarchaeota  | Acidianus hospitalis W1              |
| Acd1_1514 | C3 |            | S |        | Uncharacterized protein                                                                 | 56407101  | 417  | Crenarchaeota  | Sulfolobus sp. Y00 58-82             |
| Acd1_1515 | C3 |            | S |        | Uncharacterized protein                                                                 | 15898779  | 132  | Crenarchaeota  | Sulfolobus solfataricus P2           |
| Acd1_1516 | C3 | arCOG10265 | S |        | Uncharacterized conserved protein                                                       | 15898780  | 177  | Crenarchaeota  | Sulfolobus solfataricus P2           |
| Acd1_1517 | C3 |            | S |        | Uncharacterized protein                                                                 | 374632512 | 100  | Crenarchaeota  | Metallolobus yellowstonensis MK1     |
| Acd1_1518 | C3 |            | S |        | Uncharacterized protein                                                                 | 229580977 | 484  | Crenarchaeota  | Sulfolobus islandicus M.16.27        |
| Acd1_1519 | C3 |            | S |        | Uncharacterized protein                                                                 | 229584976 | 248  | Crenarchaeota  | Sulfolobus islandicus M.16.27        |
| Acd1_1520 | C3 |            | S |        | Uncharacterized protein                                                                 |           |      |                |                                      |
| Acd1_1521 | C3 | arCOG02134 | L |        | Transposase                                                                             | 15922323  | 71.2 | Crenarchaeota  | Sulfolobus tokodaii str. 7           |
| Acd1_1522 | C3 | arCOG03721 | R |        | HEPN domain                                                                             | 332797290 | 363  | Crenarchaeota  | Acidianus hospitalis W1              |
| Acd1_1523 | C3 | arCOG03708 | R |        | HEPN domain                                                                             | 15922333  | 71.6 | Crenarchaeota  | Sulfolobus tokodaii str. 7           |
| Acd1_1524 | C3 | arCOG04502 | V |        | PIN domain containing protein                                                           | 22529529  | 246  | Crenarchaeota  | Sulfolobus islandicus L.S.2.15       |
| Acd1_1525 | C3 | arCOG07990 | S |        | Uncharacterized protein                                                                 | 227829528 | 231  | Crenarchaeota  | Sulfolobus islandicus L.S.2.15       |
| Acd1_1526 | C3 | arCOG03167 | R |        | Predicted ATPase (AAA+ superfamily)                                                     | 15922904  | 197  | Crenarchaeota  | Sulfolobus tokodaii str. 7           |
| Acd1_1527 | C3 | arCOG00916 | E | GabT   | 4-aminobutyrate aminotransferase or related aminotransferase                            | 332796117 | 550  | Crenarchaeota  | Acidianus hospitalis W1              |
| Acd1_1528 | C3 | arCOG00916 | E | GabT   | 4-aminobutyrate aminotransferase or related aminotransferase                            | 332796117 | 476  | Crenarchaeota  | Acidianus hospitalis W1              |
| Acd1_1529 | C3 | arCOG07589 | P |        | PIN domain containing protein                                                           | 225297287 | 214  | Crenarchaeota  | Acidianus hospitalis W1              |
| Acd1_1530 | C3 | arCOG01200 | V |        | Minimal nucleotidyltransferase                                                          | 284997159 | 176  | Crenarchaeota  | Sulfolobus islandicus L.D.8.5        |
| Acd1_1531 | C3 | arCOG01191 | V |        | HEPN domain containing protein                                                          | 15920977  | 184  | Crenarchaeota  | Sulfolobus tokodaii str. 7           |
| Acd1_1532 | C3 | arCOG03844 | R |        | Tpa/TrxA-like family protein                                                            | 15922004  | 215  | Crenarchaeota  | Sulfolobus tokodaii str. 7           |
| Acd1_1533 | C3 | arCOG07852 | R |        | Predicted regulatory ATPase                                                             | 15898978  | 315  | Crenarchaeota  | Sulfolobus solfataricus P2           |
| Acd1_1534 | C3 |            | S |        | Uncharacterized protein                                                                 | 296242623 | 236  | Crenarchaeota  | Thermoplasma aggregatum DSM 11486    |
| Acd1_1535 | C3 |            | S |        | Uncharacterized protein                                                                 | 284997840 | 357  | Crenarchaeota  | Sulfolobus islandicus L.D.8.5        |
| Acd1_1536 | C3 |            | S |        | Uncharacterized protein                                                                 | 284175793 | 132  | Crenarchaeota  | Sulfolobus solfataricus 98/2         |
| Acd1_1537 | C3 |            | S |        | Uncharacterized protein                                                                 | 284175794 | 154  | Crenarchaeota  | Sulfolobus solfataricus 98/2         |
| Acd1_1538 | C3 |            | S |        | Uncharacterized protein                                                                 |           |      |                |                                      |
| Acd1_1539 | C3 | arCOG08560 | S |        | Uncharacterized conserved protein                                                       | 55701195  | 0    | Crenarchaeota  | Sulfolobus islandicus                |
| Acd1_1540 | C3 | arCOG03711 | R |        | HEPN domain                                                                             | 229582786 | 693  | Crenarchaeota  | Acidianus hospitalis Y.N.15.51       |
| Acd1_1541 | C3 | arCOG07296 | S |        | Uncharacterized conserved protein                                                       | 332797718 | 423  | Crenarchaeota  | Acidianus hospitalis W1              |
| Acd1_1542 | C3 | arCOG01646 | E | DAP2   | Dipeptidyl aminopeptidase/acylaminoacyl-peptidase                                       | 15922055  | 109  | Crenarchaeota  | Sulfolobus tokodaii str. 7           |
| Acd1_1543 | C3 | arCOG07852 | R |        | Predicted regulatory ATPase                                                             | 284997824 | 263  | Crenarchaeota  | Sulfolobus islandicus L.D.8.5        |
| Acd1_1544 | C3 | arCOG10353 | S |        | Uncharacterized conserved protein                                                       | 15898979  | 259  | Crenarchaeota  | Sulfolobus solfataricus P2           |
| Acd1_1545 | C4 |            | S |        | Uncharacterized protein                                                                 | 385772766 | 211  | Crenarchaeota  | Sulfolobus islandicus HVE10/4        |
| Acd1_1546 | C4 |            | S |        | Uncharacterized protein                                                                 |           |      |                |                                      |
| Acd1_1547 | C4 |            | S |        | Uncharacterized protein                                                                 | 157929294 | 685  | no RNA stage   | Acidianus filamentous virus 2        |
| Acd1_1548 | C4 | arCOG07237 | V |        | Uncharacterized protein, contains PIN domain                                            | 332797129 | 593  | Crenarchaeota  | Acidianus hospitalis W1              |
| Acd1_1549 | C4 | arCOG03712 | R |        | HEPN domain                                                                             | 229582786 | 815  | Crenarchaeota  | Sulfolobus islandicus Y.N.15.51      |
| Acd1_1550 | C4 | arCOG07296 | S |        | Uncharacterized conserved protein                                                       | 332797718 | 91.3 | Crenarchaeota  | Acidianus hospitalis W1              |
| Acd1_1551 | C4 |            | S |        | Uncharacterized protein                                                                 | 37464173  | 74.7 | Crenarchaeota  | Metallolobus yellowstonensis MK1     |
| Acd1_1552 | C4 | arCOG07184 | S |        | Uncharacterized conserved protein                                                       | 284998099 | 711  | Crenarchaeota  | Sulfolobus islandicus L.D.8.5        |
| Acd1_1553 | C4 | arCOG00724 | K |        | Predicted transcriptional regulator, PadR family                                        | 227830911 | 299  | Crenarchaeota  | Sulfolobus islandicus L.S.2.15       |
| Acd1_1554 | C4 | arCOG07718 | S |        | Uncharacterized conserved protein                                                       | 227830912 | 318  | Crenarchaeota  | Sulfolobus islandicus L.S.2.15       |
| Acd1_1555 | C4 | arCOG08216 | V |        | Antitoxin MazE superfamily protein                                                      | 332797286 | 33.1 | Crenarchaeota  | Acidianus hospitalis W1              |
| Acd1_1556 | C4 | arCOG07589 | V |        | PIN domain containing protein                                                           | 332797287 | 59.3 | Crenarchaeota  | Acidianus hospitalis W1              |
| Acd1_1557 | C4 | arCOG03239 | R |        | ATPase, predicted component of phage defense system                                     | 229582903 | 299  | Crenarchaeota  | Sulfolobus islandicus Y.N.15.51      |
| Acd1_1558 | C4 | arCOG03239 | R |        | ATPase, predicted component of phage defense system                                     | 229582903 | 137  | Crenarchaeota  | Sulfolobus islandicus Y.N.15.51      |
| Acd1_1559 | C4 | arCOG02681 | V |        | Predicted antitoxin, copG family                                                        | 229578552 | 372  | Crenarchaeota  | Sulfolobus islandicus Y.G.57.14      |
| Acd1_1560 | C4 | arCOG02219 | V | VapC   | PIN domain containing protein                                                           | 15898971  | 659  | Crenarchaeota  | Sulfolobus solfataricus P2           |
| Acd1_1561 | C4 | arCOG01192 | V |        | HEPN domain containing protein                                                          | 284997157 | 218  | Crenarchaeota  | Sulfolobus islandicus L.D.8.5        |
| Acd1_1562 | C4 | arCOG01203 | V |        | Minimal nucleotidyltransferase                                                          | 225297293 | 265  | Crenarchaeota  | Sulfolobus islandicus L.S.2.15       |
| Acd1_1563 | C4 | arCOG03721 | R |        | HEPN domain                                                                             | 284997160 | 243  | Crenarchaeota  | Sulfolobus islandicus L.D.8.5        |
| Acd1_1564 | C4 |            | S |        | Uncharacterized protein                                                                 | 158989786 | 334  | Crenarchaeota  | Sulfolobus solfataricus P2           |
| Acd1_1565 | C4 | arCOG04429 | C | HyaD   | Ni,Fe-hydrogenase maturation factor                                                     | 22204184  | 762  | Crenarchaeota  | Acidianus ambivalens                 |
| Acd1_1566 | C4 | arCOG06056 | C | HyaD   | Ni,Fe-hydrogenase maturation factor                                                     | 22204183  | 206  | Crenarchaeota  | Acidianus ambivalens                 |
| Acd1_1567 | C4 | arCOG06056 | C | HyaD   | Membrane-bound NiFe hydrogenase subunit                                                 | 22204182  | 1264 | Crenarchaeota  | Acidianus ambivalens                 |
| Acd1_1568 | C4 | arCOG06056 | O | HypE   | Hydrogenase maturation factor                                                           | 22204181  | 871  | Crenarchaeota  | Acidianus ambivalens                 |
| Acd1_1569 | C4 | arCOG04427 | O | HypC   | Hydrogenase maturation factor                                                           | 22204180  | 108  | Crenarchaeota  | Acidianus ambivalens                 |
| Acd1_1570 | C4 | arCOG04428 | O | HypD   | Hydrogenase maturation factor                                                           | 22204179  | 145  | Crenarchaeota  | Acidianus ambivalens                 |
| Acd1_1571 | C4 | arCOG06057 | P |        | Membrane-bound NiFe hydrogenase subunit                                                 | 22204178  | 838  | Crenarchaeota  | Acidianus ambivalens                 |
| Acd1_1572 | C4 | arCOG02852 | P | (NirD) | Ferredoxin subunit of nitrite reductase or ring-hydroxylating dioxygenase               | 22204177  | 244  | Crenarchaeota  | Acidianus ambivalens                 |
| Acd1_1573 | C4 | arCOG01560 | C | HyaB   | Ni,Fe-hydrogenase I large subunit                                                       | 22204176  | 182  | Crenarchaeota  | Acidianus ambivalens                 |
| Acd1_1574 | C4 | arCOG03033 | C | GlpC   | Fe-S oxidoreductase                                                                     | 22204175  | 63.2 | Crenarchaeota  | Acidianus ambivalens                 |
| Acd1_1575 | C4 | arCOG06072 | S |        | Uncharacterized conserved protein                                                       | 22204174  | 214  | Crenarchaeota  | Acidianus ambivalens                 |
| Acd1_1576 | C4 | arCOG02474 | C | HyaA   | Ni,Fe-hydrogenase I small subunit                                                       | 22204173  | 699  | Crenarchaeota  | Acidianus ambivalens                 |
| Acd1_1577 | C5 | arCOG01385 | M | WcaA   | Glycosyltransferase                                                                     | 284997362 | 285  | Crenarchaeota  | Sulfolobus islandicus L.D.8.5        |
| Acd1_1578 | C5 | arCOG06060 | S |        | Uncharacterized conserved protein                                                       | 325968616 | 318  | Crenarchaeota  | Acidianus ambivalens                 |
| Acd1_1579 | C5 | arCOG05999 | S |        | Uncharacterized conserved protein                                                       | 325968615 | 307  | Crenarchaeota  | Vulcanisaeta moutnovskia 768-28      |
| Acd1_1580 | C5 | arCOG03721 | R |        | HEPN domain                                                                             | 229582420 | 270  | Crenarchaeota  | Sulfolobus islandicus Y.N.15.51      |
| Acd1_1581 | C5 |            | S |        | Uncharacterized protein                                                                 | 229579803 | 74.7 | Crenarchaeota  | Sulfolobus islandicus Y.G.57.14      |
| Acd1_1582 | C5 | arCOG03042 | R | NrFG   | TPR repeats containing protein                                                          | 22204169  | 153  | Crenarchaeota  | Acidianus ambivalens                 |
| Acd1_1583 | C5 | arCOG10353 |   |        |                                                                                         |           |      |                |                                      |

|           |    |            |   |           |                                                                                                                |           |      |                              |                                    |
|-----------|----|------------|---|-----------|----------------------------------------------------------------------------------------------------------------|-----------|------|------------------------------|------------------------------------|
| Acd1_1609 | CS | arCOG00978 | J | GCD14     | tRNA[1-methyladenosine] methyltransferase                                                                      | 15920572  | 308  | Crenarchaeota                | Sulfolobus tokodaii str. 7         |
| Acd1_1610 | CS | arCOG01009 | V | -         | Ribbon-helix-helix protein, copG family                                                                        | 70606633  | 147  | Crenarchaeota                | Sulfolobus acidocaldarius DSM 639  |
| Acd1_1611 | CS | arCOG02037 | K | -         | Sugar-specific transcriptional regulator TrmB                                                                  | 15920573  | 39.3 | Crenarchaeota                | Sulfolobus tokodaii str. 7         |
| Acd1_1612 | CS | arCOG04327 | J | -         | Ribosomal protein S25                                                                                          | 15920574  | 692  | Crenarchaeota                | Sulfolobus tokodaii str. 7         |
| Acd1_1613 | CS | arCOG00062 | R | -         | Predicted amidohydrolase                                                                                       | 15920575  | 34.3 | Crenarchaeota                | Sulfolobus tokodaii str. 7         |
| Acd1_1614 | CS | arCOG01526 | L | -         | Reverse gyrase                                                                                                 | 42559518  | 1061 | Crenarchaeota                | Sulfolobus tokodaii str. 7         |
| Acd1_1615 | CS | arCOG01308 | O | Cdc48     | ATPase of the AAA+ class , CDC48 family                                                                        | 332796393 | 144  | Crenarchaeota                | Acidianus hospitalis W1            |
| Acd1_1616 | CS | arCOG01696 | G | -         | 2,3-bisphosphoglycerate-independent phosphoglycerate mutase                                                    | 15920579  | 192  | Crenarchaeota                | Sulfolobus tokodaii str. 7         |
| Acd1_1617 | CS | arCOG00376 | S | -         | Small Multidrug Resistance (SMR) family protein                                                                | 28924912  | 229  | Bacteroidetes/Chlorobi group | Prevotella bucae D17               |
| Acd1_1618 | CS | arCOG01373 | M | Gmd       | GDP-D-mannose dehydratase                                                                                      | 270088787 | 164  | Opisthokonta                 | Tribolium castaneum                |
| Acd1_1619 | CS | arCOG03812 | S | -         | Predicted membrane protein                                                                                     | 325968342 | 164  | Crenarchaeota                | Vulcanisaeta moutnovskia 768-28    |
| Acd1_1620 | CS | arCOG01419 | M | RfaG      | Glycosyltransferase                                                                                            | 70607630  | 702  | Crenarchaeota                | Sulfolobus acidocaldarius DSM 639  |
| Acd1_1621 | CS | -          | S | -         | Uncharacterized protein                                                                                        | 15920191  | 186  | Crenarchaeota                | Sulfolobus tokodaii str. 7         |
| Acd1_1622 | CS | arCOG03895 | M | WcaA      | Glycosyltransferase                                                                                            | 374328281 | 245  | Crenarchaeota                | Pyrobaculum sp. 1860               |
| Acd1_1623 | CS | arCOG04076 | S | -         | Uncharacterized conserved protein                                                                              | 70606626  | 577  | Crenarchaeota                | Sulfolobus acidocaldarius DSM 639  |
| Acd1_1624 | CS | arCOG04077 | K | Spt4      | Transcription elongation factor Spt4/RpoE2, zinc finger protein                                                | 15920581  | 182  | Crenarchaeota                | Sulfolobus tokodaii str. 7         |
| Acd1_1625 | CS | arCOG00675 | K | RPB7      | DNA-directed RNA polymerase, subunit E'                                                                        | 15920582  | 131  | Crenarchaeota                | Sulfolobus tokodaii str. 7         |
| Acd1_1626 | CS | arCOG04312 | R | -         | PIN domain containing protein                                                                                  | 70606623  | 394  | Crenarchaeota                | Sulfolobus acidocaldarius DSM 639  |
| Acd1_1627 | CS | arCOG01563 | J | GCD11     | Transition initiation factor 2, gamma subunit (eIF-2gamma, GTPase)                                             | 70606622  | 120  | Crenarchaeota                | Sulfolobus acidocaldarius DSM 639  |
| Acd1_1628 | CS | arCOG01946 | J | RP56A     | Ribosomal protein S6e (S10)                                                                                    | 161751100 | 59.7 | Crenarchaeota                | Sulfolobus tokodaii str. 7         |
| Acd1_1629 | CS | arCOG02246 | P | -         | Sirohydrochlorin ferrochelatase                                                                                | 332796400 | 39.7 | Crenarchaeota                | Acidianus hospitalis W1            |
| Acd1_1630 | CS | arCOG04185 | J | RpsD      | Ribosomal protein S15P                                                                                         | 15920587  | 536  | Crenarchaeota                | Sulfolobus tokodaii str. 7         |
| Acd1_1631 | CS | arCOG01876 | E | MetE      | Methionine synthase II (cobalamin-independent)                                                                 | 15920588  | 526  | Crenarchaeota                | Sulfolobus tokodaii str. 7         |
| Acd1_1632 | CS | arCOG01877 | E | MetE      | Methionine synthase II (cobalamin-independent)                                                                 | 70606617  | 74.3 | Crenarchaeota                | Sulfolobus acidocaldarius DSM 639  |
| Acd1_1633 | CS | arCOG04048 | L | DnaN      | DNA polymerase sliding clamp subunit (PCNA homolog)                                                            | 13124404  | 898  | Crenarchaeota                | Sulfurifera ohwakuenis             |
| Acd1_1634 | CS | arCOG00106 | H | CobB      | Cobyrinic acid a,c-diamide synthase                                                                            | 15920592  | 911  | Crenarchaeota                | Sulfolobus tokodaii str. 7         |
| Acd1_1635 | CS | arCOG04319 | S | -         | Predicted membrane protein                                                                                     | 15920593  | 246  | Crenarchaeota                | Sulfolobus tokodaii str. 7         |
| Acd1_1636 | CS | -          | S | -         | Uncharacterized protein                                                                                        | -         | -    | -                            | -                                  |
| Acd1_1637 | CS | arCOG00488 | L | DnaN      | DNA polymerase sliding clamp subunit (PCNA homolog)                                                            | 15920600  | 792  | Crenarchaeota                | Sulfolobus tokodaii str. 7         |
| Acd1_1638 | CS | arCOG05938 | K | Rpo13     | DNA-directed RNA polymerase subunit 13                                                                         | 15920601  | 94.7 | Crenarchaeota                | Sulfolobus tokodaii str. 7         |
| Acd1_1639 | CS | arCOG02025 | L | HelA      | Helicase                                                                                                       | 15920603  | 48.9 | Crenarchaeota                | Sulfolobus tokodaii str. 7         |
| Acd1_1640 | CS | arCOG00557 | J | Lhr       | Lhr-like helicase                                                                                              | 15920604  | 173  | Crenarchaeota                | Sulfolobus tokodaii str. 7         |
| Acd1_1641 | CS | arCOG04167 | R | RPL14A    | Ribosomal protein L14E/L6E/L27E                                                                                | 146302840 | 48.9 | Crenarchaeota                | Metallosphaera sedula DSM 5348     |
| Acd1_1642 | CS | arCOG06402 | J | TruB      | DKCLD domain, TruB/PUA associated                                                                              | 70606602  | 949  | Crenarchaeota                | Sulfolobus acidocaldarius DSM 639  |
| Acd1_1643 | CS | arCOG00987 | J | TruB      | Pseudouridine synthase                                                                                         | 15920607  | 76.3 | Crenarchaeota                | Sulfolobus tokodaii str. 7         |
| Acd1_1644 | CS | arCOG01010 | J | RsmC      | 16S rRNA G1207 methylase RsmC                                                                                  | 15920608  | 346  | Crenarchaeota                | Sulfolobus tokodaii str. 7         |
| HNASerTGA |    |            |   |           | HNASerTGA                                                                                                      |           |      |                              |                                    |
| Acd1_1645 | CS | arCOG02960 | R | -         | Predicted aminopeptidase, lap family                                                                           | 15922218  | 158  | Crenarchaeota                | Sulfolobus tokodaii str. 7         |
| Acd1_1646 | CS | arCOG03692 | S | -         | Uncharacterized conserved protein                                                                              | 330835516 | 180  | Crenarchaeota                | Metallosphaera cuprina Ar-4        |
| Acd1_1647 | CS | -          | S | -         | Uncharacterized protein                                                                                        | -         | -    | -                            | -                                  |
| Acd1_1648 | CS | arCOG07284 | S | -         | Uncharacterized conserved protein                                                                              | 238620076 | 465  | Crenarchaeota                | Sulfolobus islandicus M.16.4       |
| Acd1_1649 | CS | arCOG08462 | S | -         | Uncharacterized conserved protein                                                                              | 284175218 | 171  | Crenarchaeota                | Sulfolobus solfataricus 98/2       |
| Acd1_1650 | CS | -          | S | -         | Uncharacterized protein                                                                                        | -         | -    | -                            | -                                  |
| Acd1_1651 | CS | arCOG09897 | S | -         | Uncharacterized conserved protein                                                                              | 284807120 | 85.1 | Crenarchaeota                | Sulfolobus islandicus LD.8.5       |
| Acd1_1652 | CS | -          | S | -         | Uncharacterized protein                                                                                        | 284807119 | 140  | Crenarchaeota                | Sulfolobus islandicus LD.8.5       |
| Acd1_1653 | CS | arCOG01044 | G | ProP      | Permease of the major facilitator superfamily                                                                  | 332796720 | 279  | Crenarchaeota                | Acidianus hospitalis W1            |
| Acd1_1654 | CS | -          | S | -         | Uncharacterized protein                                                                                        | -         | -    | -                            | -                                  |
| Acd1_1655 | CS | arCOG08380 | S | -         | Uncharacterized conserved protein                                                                              | 238618752 | 638  | Crenarchaeota                | Sulfolobus islandicus M.16.4       |
| Acd1_1656 | CS | arCOG09871 | S | -         | SWIM Zn-finger                                                                                                 | 332796124 | 280  | Crenarchaeota                | Acidianus hospitalis W1            |
| Acd1_1657 | CS | arCOG01068 | C | Lpd       | Pyruvate/2-oxoglutarate dehydrogenase complex, dihydrolipoamide dehydrogenase (E3) component or related enzyme | 307595489 | 199  | Crenarchaeota                | Vulcanisaeta distributa DSM 14429  |
| Acd1_1658 | CS | arCOG01658 | S | -         | TRASH domain-containing protein, metal-binding                                                                 | 384433025 | 197  | Crenarchaeota                | Sulfolobus solfataricus 98/2       |
| Acd1_1659 | CS | -          | S | -         | Uncharacterized protein                                                                                        | -         | -    | -                            | -                                  |
| Acd1_1660 | CS | -          | S | -         | Uncharacterized protein                                                                                        | 15920319  | 264  | Crenarchaeota                | Sulfolobus tokodaii str. 7         |
| Acd1_1661 | CS | arCOG02900 | R | -         | Uncharacterized protein containing a von Willebrand factor type A (vWA) domain                                 | 374632747 | 670  | Crenarchaeota                | Metallosphaera yellowstonensis MK1 |
| Acd1_1662 | C6 | arCOG07245 | S | 0         | Uncharacterized conserved protein                                                                              | 15898779  | 215  | Crenarchaeota                | Sulfolobus solfataricus P2         |
| Acd1_1663 | C6 | arCOG01907 | S | -         | Uncharacterized conserved protein                                                                              | 332797638 | 202  | Crenarchaeota                | Acidianus hospitalis W1            |
| Acd1_1664 | C6 | arCOG01064 | R | HcaD      | NAD(FAD)-dependent dehydrogenase                                                                               | 15922539  | 214  | Crenarchaeota                | Sulfolobus tokodaii str. 7         |
| Acd1_1665 | C6 | arCOG04531 | P | MntH      | Mn2+ and Fe2+ transporter of the NRAMP family                                                                  | 15922217  | 305  | Crenarchaeota                | Sulfolobus tokodaii str. 7         |
| Acd1_1667 | C6 | arCOG02682 | G | ProP      | Permease of the major facilitator superfamily                                                                  | 15922695  | 139  | Crenarchaeota                | Sulfolobus tokodaii str. 7         |
| Acd1_1666 | C6 | -          | S | -         | Uncharacterized protein                                                                                        | -         | -    | -                            | -                                  |
| Acd1_1668 | C6 | -          | S | -         | Uncharacterized protein                                                                                        | 302349294 | 275  | Crenarchaeota                | Acidilobus saccharovorans 345-15   |
| Acd1_1669 | C6 | -          | S | -         | Uncharacterized protein                                                                                        | -         | -    | -                            | -                                  |
| Acd1_1670 | C6 | arCOG01423 | R | -         | RecB-like nuclease fused to coiled-coil domain                                                                 | 332797444 | 60.1 | Crenarchaeota                | Acidianus hospitalis W1            |
| Acd1_1671 | C6 | -          | S | -         | Uncharacterized protein                                                                                        | 374632567 | 47   | Crenarchaeota                | Metallosphaera yellowstonensis MK1 |
| Acd1_1672 | C6 | -          | S | -         | Uncharacterized protein                                                                                        | 227827418 | 287  | Crenarchaeota                | Sulfolobus islandicus M.14.25      |
| Acd1_1673 | C6 | arCOG03169 | R | -         | Predicted ATPase (AAA+ superfamily)                                                                            | 374632567 | 273  | Crenarchaeota                | Metallosphaera yellowstonensis MK1 |
| Acd1_1674 | C6 | arCOG01423 | R | -         | RecB-like nuclease fused to coiled-coil domain                                                                 | 332797444 | 31.2 | Crenarchaeota                | Acidianus hospitalis W1            |
| Acd1_1675 | C7 | arCOG02657 | V | Cas7/Cmr4 | CRISPR system related protein, RAMP superfamily Cas7 group                                                     | 124027500 | 42.7 | Crenarchaeota                | Hyperthermus butylicus DSM 5456    |
| Acd1_1676 | C7 | arCOG03483 | V | Cas3d     | CRISPR system related helicase, Cas3 (C-terminal HD nuclease domain)                                           | 385772759 | 199  | Crenarchaeota                | Sulfolobus islandicus HVE10/4      |
| Acd1_1677 | C7 | arCOG05134 | V | Cas5/Csc1 | CRISPR associated protein, RAMP family Cas5 group                                                              | 385772760 | 933  | Crenarchaeota                | Sulfolobus islandicus HVE10/4      |
| Acd1_1678 | C7 | arCOG03482 | K | Cas7/Csc2 | CRISPR system related protein, RAMP superfamily Cas7 group                                                     | 385772761 | 35.4 | Crenarchaeota                | Sulfolobus islandicus HVE10/4      |
| Acd1_1679 | C7 | -          | V | Csc3      | CRISPR system related protein, predicted large subunit of Cascade complex                                      | 385772762 | 817  | Crenarchaeota                | Sulfolobus islandicus HVE10/4      |
| Acd1_1680 | C7 | arCOG01440 | V | Cas6      | CRISPR system related protein, RAMP superfamily Cas6 group                                                     | 385772764 | 111  | Crenarchaeota                | Sulfolobus islandicus HVE10/4      |
| Acd1_1681 | C7 | arCOG01452 | V | Cas1      | CRISPR-associated protein Cas1                                                                                 | 385772765 | 150  | Crenarchaeota                | Sulfolobus islandicus HVE10/4      |
| Acd1_1682 | C8 | arCOG01671 | H | UbiD      | 3-poly(phenyl-4-hydroxybenzoate decarboxylase or related decarboxylase                                         | 307595548 | 557  | Crenarchaeota                | Vulcanisaeta distributa DSM 14429  |
| Acd1_1683 | C8 | -          | S | -         | Uncharacterized protein                                                                                        | -         | -    | -                            | -                                  |
| Acd1_1684 | C8 | arCOG01669 | S | -         | Uncharacterized conserved protein                                                                              | 15922146  | 124  | Crenarchaeota                | Sulfolobus tokodaii str. 7         |
| Acd1_1685 | C8 | arCOG03869 | S | -         | Uncharacterized conserved protein                                                                              | 15922718  | 149  | Crenarchaeota                | Sulfolobus tokodaii str. 7         |
| Acd1_1686 | C8 | arCOG00132 | G | ProP      | Permease of the major facilitator superfamily                                                                  | 330834864 | 189  | Crenarchaeota                | Metallosphaera cuprina Ar-4        |
| Acd1_1687 | C8 | arCOG02687 | G | ProP      | Permease of the major facilitator superfamily                                                                  | 15921095  | 155  | Crenarchaeota                | Sulfolobus tokodaii str. 7         |
| Acd1_1688 | C8 | arCOG06025 | S | -         | Uncharacterized conserved protein                                                                              | 229578762 | 155  | Crenarchaeota                | Sulfolobus islandicus V.G.57.14    |
| Acd1_1689 | C8 | arCOG06046 | S | -         | Hemerythrin HHE cation binding domain containing protein                                                       | 146304008 | 67   | Crenarchaeota                | Metallosphaera sedula DSM 5348     |
| Acd1_1690 | C8 | arCOG01254 | R | -         | Predicted metal-dependent hydrolase related to alanyl-tRNA synthetase                                          | 146304928 | 306  | Crenarchaeota                | Metallosphaera sedula DSM 5348     |
| Acd1_1691 | C8 | arCOG00648 | H | CobF      | Precorrin-2 methylase                                                                                          | 167038979 | 343  | Firmicutes                   | Thermoanaerobacter sp. X514        |
| Acd1_1692 | C8 | -          | S | -         | Uncharacterized protein                                                                                        | -         | -    | -                            | -                                  |
| Acd1_1693 | C8 | arCOG11297 | S | -         | Uncharacterized conserved protein                                                                              | 15922505  | 215  | Crenarchaeota                | Sulfolobus tokodaii str. 7         |
| Acd1_1694 | C8 | arCOG00506 | C | FpaA      | Uncharacterized flavoprotein                                                                                   | 15922504  | 246  | Crenarchaeota                | Sulfolobus tokodaii str. 7         |
| Acd1_1695 | C9 | -          | S | -         | Uncharacterized protein                                                                                        | -         | -    | -                            | -                                  |
| Acd1_1696 | C9 | -          | S | -         | Uncharacterized protein                                                                                        | -         | -    | -                            | -                                  |
| Acd1_1697 | C9 | -          | S | -         | Uncharacterized protein                                                                                        | -         | -    | -                            | -                                  |
| Acd1_1698 | C9 | -          | S | -         | Uncharacterized protein                                                                                        | -         | -    | -                            | -                                  |
| Acd1_1699 | C9 | -          | S | -         | Uncharacterized protein                                                                                        | -         | -    | -                            | -                                  |
