# Supplementary material for: Insights into archaeal evolution and symbiosis from the genomes of a nanoarchaeon and its inferred crenarchaeal host from Obsidian Pool, Yellowstone National Park
Source: Springer Nature journal article supplement (doi:10.1186/1745-6150-8-9), 2013-04-22
Supplement: 13062_2013_372_MOESM4_ESM.pdf [file 13062_2013_372_MOESM4_ESM.pdf]

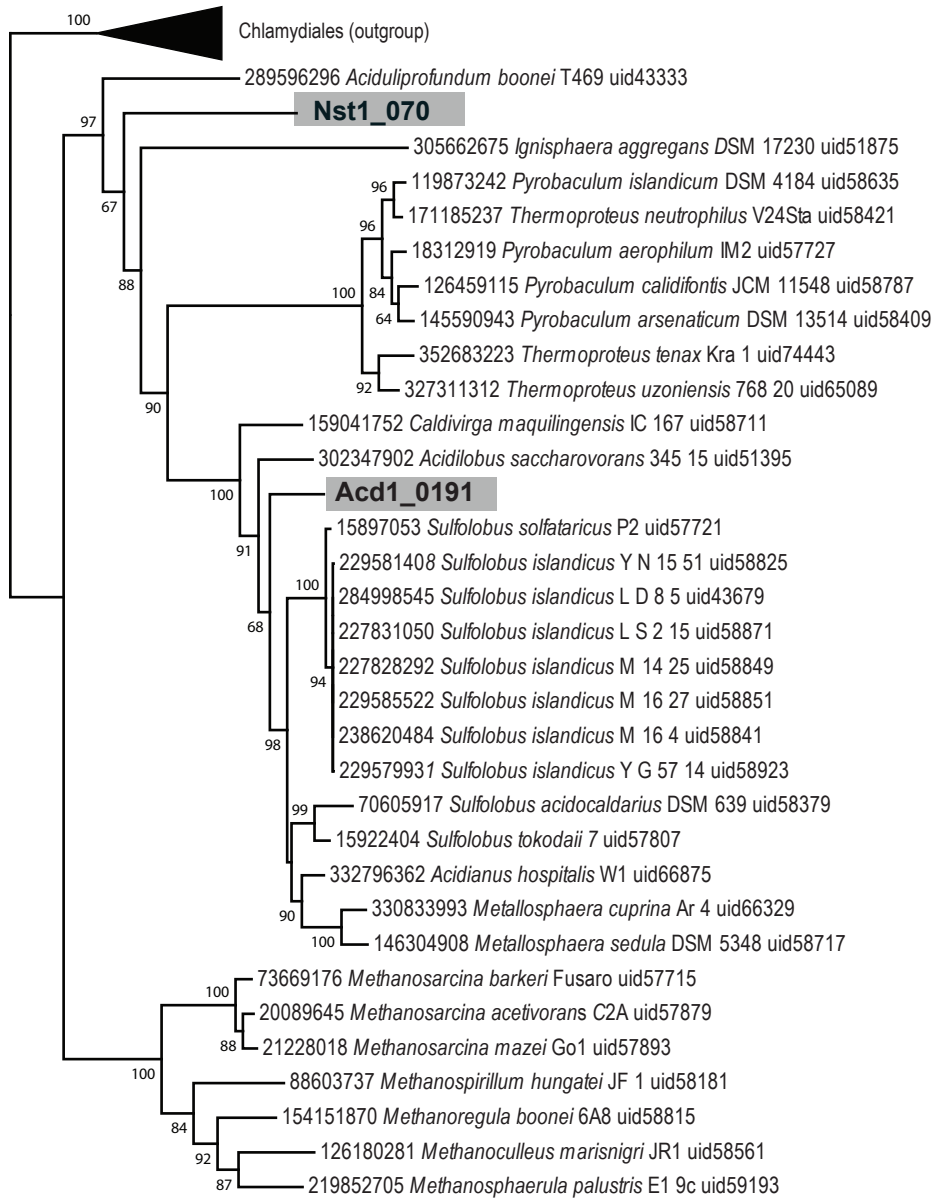

0.1

Additional file 4. Maximum likelihood phylogeny of archaeal lysyl-tRNA synthetases of class II (arCOG00408, COG1190).
