# Supplementary material for: Insights into archaeal evolution and symbiosis from the genomes of a nanoarchaeon and its inferred crenarchaeal host from Obsidian Pool, Yellowstone National Park
Source: Springer Nature journal article supplement (doi:10.1186/1745-6150-8-9), 2013-04-22
Supplement: 13062_2013_372_MOESM5_ESM.pdf [file 13062_2013_372_MOESM5_ESM.pdf]

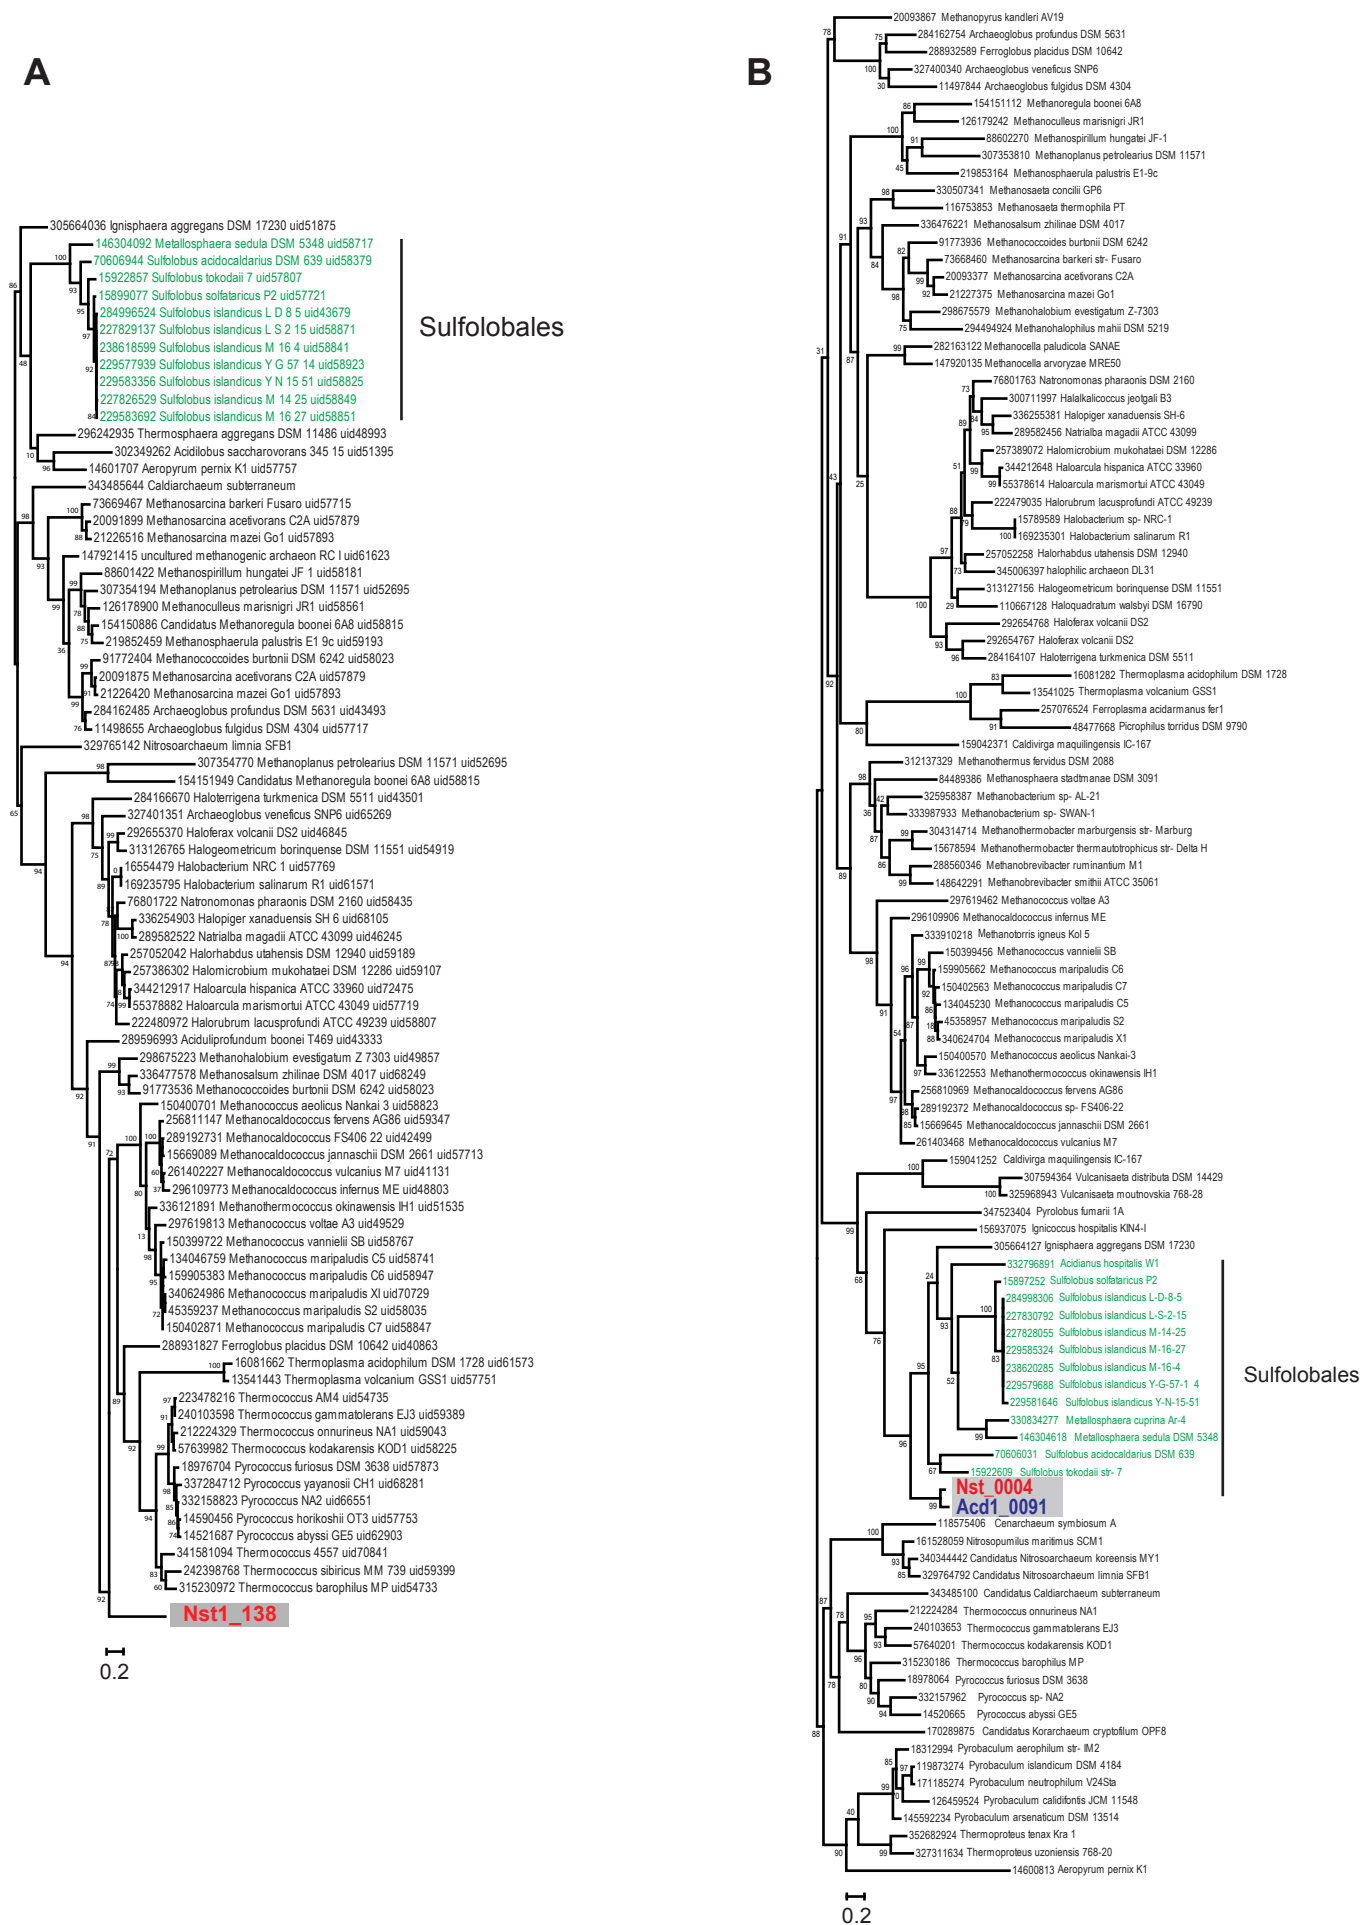

Additional file 5. Maximum likelihood phylogeny of archaeal FlaH archaeellum (A) and 3-dehydroquininate dehydratase (AroD, arCOG2097)(B) proteins.
