# Supplementary material for: Insights into archaeal evolution and symbiosis from the genomes of a nanoarchaeon and its inferred crenarchaeal host from Obsidian Pool, Yellowstone National Park
Source: Springer Nature journal article supplement (doi:10.1186/1745-6150-8-9), 2013-04-22
Supplement: 13062_2013_372_MOESM6_ESM.pdf [file 13062_2013_372_MOESM6_ESM.pdf]

**Additional file 6. The 283 arCOGs present in both Nanoarchaeota**

| arCOG      | COG      | Gene   | Function code |                                                                                         | Acc1 | # genomes in  | # genomes in  |
|------------|----------|--------|---------------|-----------------------------------------------------------------------------------------|------|---------------|---------------|
|            |          |        | (as in COGs)  | Annotation                                                                              |      | Crenarchaeota | Euryarchaeota |
|            |          |        |               |                                                                                         |      | (35 max)      | (78 max)      |
| arCOG00349 | COG01141 | Fer    | C             | Ferredoxin                                                                              | 0    | 19            | 42            |
| arCOG01711 | COG00221 | Ppa    | C             | Inorganic pyrophosphatase                                                               | 1    | 27            | 47            |
| arCOG02201 | COG00206 | FtsZ   | D             | Cell division GTPase                                                                    | 0    | 0             | 76            |
| arCOG02263 | COG02450 | -      | D             | Predicted cell division protein, SepF homolog                                           | 0    | 0             | 76            |
| arCOG01924 | COG00252 | AnsB   | E             | L-asparaginase/archaeal Glu-tRNA <sup>Gln</sup> amidotransferase subunit D              | 1    | 35            | 78            |
| arCOG01700 | COG00010 | SpeB   | E             | Arginase family enzyme                                                                  | 1    | 35            | 75            |
| arCOG01107 | COG00624 | ArgE   | E             | Acetylornithine deacetylase/Succinyl-diaminopimelate desuccinylase or related deacylase | 1    | 35            | 62            |
| arCOG00255 | COG00077 | PheA   | E             | Prephenate dehydratase                                                                  | 1    | 26            | 65            |
| arCOG04048 | COG00717 | Dcd    | F             | Deoxycytidine deaminase                                                                 | 1    | 35            | 78            |
| arCOG00419 | COG00537 | Hit    | F             | HIT family hydrolase                                                                    | 1    | 35            | 71            |
| arCOG01038 | COG01936 | -      | F             | Predicted nucleotide kinase (CMP/AMP kinase related)                                    | 1    | 33            | 78            |
| arCOG04313 | COG00105 | Ndk    | F             | Nucleoside diphosphate kinase                                                           | 1    | 30            | 78            |
| arCOG01039 | COG02019 | AdkA   | F             | Archaeal adenylate kinase                                                               | 1    | 28            | 48            |
| arCOG01111 | COG00574 | PpsA   | G             | Phosphoenolpyruvate synthase/pyruvate phosphate dikinase                                | 1    | 34            | 78            |
| arCOG01676 | COG00476 | ThiF   | H             | Dinucleotide-utilizing enzyme involved in molybdopterin and thiamine biosynthesis       | 1    | 35            | 68            |
| arCOG00535 | COG02104 | ThiS   | H             | Sulfur transfer protein involved in thiamine biosynthesis                               | 1    | 14            | 64            |
| arCOG00807 | COG00060 | IleS   | J             | Isoleucyl-tRNA synthetase                                                               | 1    | 35            | 78            |
| arCOG01719 | COG02511 | GatE   | J             | Archaeal Glu-tRNA <sup>Gln</sup> amidotransferase subunit E (contains GAD domain)       | 1    | 35            | 78            |
| arCOG01701 | COG01676 | SEN2   | J             | tRNA splicing endonuclease                                                              | 1    | 35            | 78            |
| arCOG00810 | COG00143 | MetG   | J             | Methionyl-tRNA synthetase                                                               | 1    | 35            | 78            |
| arCOG01255 | COG00013 | AlaS   | J             | Alanyl-tRNA synthetase                                                                  | 1    | 35            | 78            |
| arCOG00042 | COG00037 | MesJ   | J             | tRNA(Ile)-lysidine synthase MesJ                                                        | 1    | 35            | 77            |
| arCOG00809 | COG00495 | LeuS   | J             | Leucyl-tRNA synthetase                                                                  | 1    | 35            | 71            |
| arCOG00973 | COG00144 | Sun    | J             | tRNA or rRNA cytosine-C5-methylase                                                      | 1    | 35            | 54            |
| arCOG00357 | COG00012 | -      | J             | Predicted GTPase, probable translation factor                                           | 1    | 35            | 78            |
| arCOG00402 | COG00442 | ProS   | J             | Prolyl-tRNA synthetase                                                                  | 1    | 35            | 78            |
| arCOG00405 | COG00423 | GRS1   | J             | Glycyl-tRNA synthetase (class II)                                                       | 1    | 35            | 78            |
| arCOG01887 | COG00180 | TrpS   | J             | Tryptophanyl-tRNA synthetase                                                            | 1    | 35            | 78            |
| arCOG04112 | COG01736 | DPH2   | J             | Diphthamide synthase subunit DPH2                                                       | 1    | 35            | 78            |
| arCOG00401 | COG00441 | ThrS   | J             | Threonyl-tRNA synthetase                                                                | 1    | 35            | 78            |
| arCOG00033 | COG02520 | Trm5   | J             | Wybutosine (yW) biosynthesis enzyme, Trm5 methyltransferase                             | 1    | 35            | 78            |
| arCOG00078 | COG01889 | NOP1   | J             | Fibrillar-like rRNA methylase                                                           | 1    | 35            | 78            |
| arCOG00403 | COG00172 | SerS   | J             | Seryl-tRNA synthetase                                                                   | 1    | 35            | 78            |
| arCOG00404 | COG00124 | HisS   | J             | Histidyl-tRNA synthetase                                                                | 1    | 35            | 78            |
| arCOG00406 | COG00017 | AsnS   | J             | Aspartyl/asparaginyl-tRNA synthetase                                                    | 1    | 35            | 78            |
| arCOG00410 | COG00016 | PheS   | J             | Phenylalanyl-tRNA synthetase alpha subunit                                              | 1    | 35            | 78            |
| arCOG00412 | COG00072 | PheT   | J             | Phenylalanyl-tRNA synthetase beta subunit                                               | 1    | 35            | 78            |
| arCOG00487 | COG00018 | ArgS   | J             | Arginyl-tRNA synthetase                                                                 | 1    | 35            | 78            |
| arCOG00779 | COG00200 | RplO   | J             | Ribosomal protein L15                                                                   | 1    | 35            | 78            |
| arCOG00780 | COG01727 | RPL18A | J             | Ribosomal protein L18E                                                                  | 1    | 35            | 78            |
| arCOG00782 | COG00199 | RpsN   | J             | Ribosomal protein S14                                                                   | 1    | 35            | 78            |
| arCOG00808 | COG00525 | ValS   | J             | Valyl-tRNA synthetase                                                                   | 1    | 35            | 78            |
| arCOG01001 | COG00024 | Map    | J             | Methionine aminopeptidase                                                               | 1    | 35            | 78            |
| arCOG01179 | COG00361 | InfA   | J             | Translation initiation factor 1 (IF-1)                                                  | 1    | 35            | 78            |
| arCOG01219 | COG01867 | TRM1   | J             | N2,N2-dimethylguanosine tRNA methyltransferase                                          | 1    | 35            | 78            |
| arCOG01344 | COG02238 | RPS19A | J             | Ribosomal protein S19E (S16A)                                                           | 1    | 35            | 78            |
| arCOG01559 | COG00480 | FusA   | J             | Translation elongation factor G, EF-G (GTPase)                                          | 1    | 35            | 78            |
| arCOG01560 | COG00532 | InfB   | J             | Translation initiation factor 2 (IF-2; GTPase)                                          | 1    | 35            | 78            |
| arCOG01561 | COG05256 | TEF1   | J             | Translation elongation factor EF-1alpha (GTPase)                                        | 1    | 35            | 78            |
| arCOG01563 | COG05257 | GCD11  | J             | Translation initiation factor 2, gamma subunit (eIF-2gamma; GTPase)                     | 1    | 35            | 78            |
| arCOG01640 | COG01601 | GCD7   | J             | Translation initiation factor 2, beta subunit (eIF-2beta)/eIF-5 N-terminal domain       | 1    | 35            | 78            |
| arCOG01722 | COG00099 | RpsM   | J             | Ribosomal protein S13                                                                   | 1    | 35            | 78            |
| arCOG01741 | COG01537 | PelA   | J             | Release factor eRF1                                                                     | 1    | 35            | 78            |
| arCOG01751 | COG01358 | RPL8A  | J             | Ribosomal protein L7AE                                                                  | 1    | 35            | 78            |
| arCOG01758 | COG00051 | RpsJ   | J             | Ribosomal protein S10                                                                   | 1    | 35            | 78            |
| arCOG01885 | COG01383 | RPS17A | J             | Ribosomal protein S17E                                                                  | 1    | 35            | 78            |
| arCOG01886 | COG00162 | TyrS   | J             | Tyrosyl-tRNA synthetase                                                                 | 1    | 35            | 78            |
| arCOG01923 | COG01498 | SIK1   | J             | Protein implicated in ribosomal biogenesis, Nop56p homolog                              | 1    | 35            | 78            |
| arCOG01946 | COG02125 | RPS6A  | J             | Ribosomal protein S6E (S10)                                                             | 1    | 35            | 78            |
| arCOG01988 | COG02092 | EFB1   | J             | Translation elongation factor EF-1beta                                                  | 1    | 35            | 78            |
| arCOG04067 | COG00090 | RplB   | J             | Ribosomal protein L2                                                                    | 1    | 35            | 78            |
| arCOG04070 | COG00087 | RplC   | J             | Ribosomal protein L3                                                                    | 1    | 35            | 78            |
| arCOG04071 | COG00088 | RplD   | J             | Ribosomal protein L4                                                                    | 1    | 35            | 78            |
| arCOG04072 | COG00089 | RplW   | J             | Ribosomal protein L23                                                                   | 1    | 35            | 78            |
| arCOG04086 | COG01841 | RpmD   | J             | Ribosomal protein L30                                                                   | 1    | 35            | 78            |
| arCOG04087 | COG00098 | RpsE   | J             | Ribosomal protein S5                                                                    | 1    | 35            | 78            |
| arCOG04088 | COG00256 | RplR   | J             | Ribosomal protein L18                                                                   | 1    | 35            | 78            |
| arCOG04089 | COG02147 | RPL19A | J             | Ribosomal protein L19E                                                                  | 1    | 35            | 78            |
| arCOG04090 | COG00097 | RplF   | J             | Ribosomal protein L6P                                                                   | 1    | 35            | 78            |
| arCOG04091 | COG00096 | RpsH   | J             | Ribosomal protein S8                                                                    | 1    | 35            | 78            |
| arCOG04092 | COG00094 | RplE   | J             | Ribosomal protein L5                                                                    | 1    | 35            | 78            |
| arCOG04093 | COG01471 | RPS4A  | J             | Ribosomal protein S4E                                                                   | 1    | 35            | 78            |

|            |          |        |   |                                                                               |   |    |    |
|------------|----------|--------|---|-------------------------------------------------------------------------------|---|----|----|
| arCOG04094 | COG00198 | RplX   | J | Ribosomal protein L24                                                         | 1 | 35 | 78 |
| arCOG04095 | COG00093 | RplN   | J | Ribosomal protein L14                                                         | 1 | 35 | 78 |
| arCOG04096 | COG00186 | RpsQ   | J | Ribosomal protein S17                                                         | 1 | 35 | 78 |
| arCOG04097 | COG00092 | RpsC   | J | Ribosomal protein S3                                                          | 1 | 35 | 78 |
| arCOG04098 | COG00091 | RplV   | J | Ribosomal protein L22                                                         | 1 | 35 | 78 |
| arCOG04099 | COG00185 | RpsS   | J | Ribosomal protein S19                                                         | 1 | 35 | 78 |
| arCOG04107 | COG01093 | SUI2   | J | Translation initiation factor 2, alpha subunit (eIF-2alpha)                   | 1 | 35 | 78 |
| arCOG04109 | COG01631 | RPL42A | J | Ribosomal protein L44E                                                        | 1 | 35 | 78 |
| arCOG04113 | COG00197 | RplP   | J | Ribosomal protein L10AE/L16                                                   | 1 | 35 | 78 |
| arCOG04129 | COG02139 | RPL21A | J | Ribosomal protein L21E                                                        | 1 | 35 | 78 |
| arCOG04182 | COG02004 | RPS24A | J | Ribosomal protein S24E                                                        | 1 | 35 | 78 |
| arCOG04185 | COG00184 | RpsO   | J | Ribosomal protein S15P                                                        | 1 | 35 | 78 |
| arCOG04208 | COG01997 | RPL43A | J | Ribosomal protein L37AE/L43A                                                  | 1 | 35 | 78 |
| arCOG04223 | COG00023 | SUI1   | J | Translation initiation factor 1 (eIF-1/SUI1)                                  | 1 | 35 | 78 |
| arCOG04228 | COG01990 | pth2   | J | Peptidyl-tRNA hydrolase                                                       | 1 | 35 | 78 |
| arCOG04239 | COG00522 | RpsD   | J | Ribosomal protein S4 or related protein                                       | 1 | 35 | 78 |
| arCOG04242 | COG00102 | RplM   | J | Ribosomal protein L13                                                         | 1 | 35 | 78 |
| arCOG04243 | COG00103 | Rpsi   | J | Ribosomal protein S9                                                          | 1 | 35 | 78 |
| arCOG04245 | COG00052 | RpsB   | J | Ribosomal protein S2                                                          | 1 | 35 | 78 |
| arCOG04249 | COG01746 | CCA1   | J | tRNA nucleotidyltransferase (CCA-adding enzyme)                               | 1 | 35 | 78 |
| arCOG04254 | COG00049 | RpsG   | J | Ribosomal protein S7                                                          | 1 | 35 | 78 |
| arCOG04255 | COG00048 | RpsL   | J | Ribosomal protein S12                                                         | 1 | 35 | 78 |
| arCOG04287 | COG02058 | RPP1A  | J | Ribosomal protein L12E/L44/L45/RPP1/RPP2                                      | 1 | 35 | 78 |
| arCOG04288 | COG00244 | RplJ   | J | Ribosomal protein L10                                                         | 1 | 35 | 78 |
| arCOG04289 | COG00081 | RplA   | J | Ribosomal protein L1                                                          | 1 | 35 | 78 |
| arCOG04302 | COG00008 | GlnS   | J | Glutamyl- or glutaminyl-tRNA synthetase                                       | 1 | 35 | 78 |
| arCOG04314 | COG02053 | RPS28A | J | Ribosomal protein S28E/S33                                                    | 1 | 35 | 78 |
| arCOG04372 | COG00080 | RplK   | J | Ribosomal protein L11                                                         | 1 | 35 | 78 |
| arCOG00781 | COG01717 | RPL32  | J | Ribosomal protein L32E                                                        | 1 | 35 | 78 |
| arCOG01950 | COG02075 | RPL24A | J | Ribosomal protein L24E                                                        | 1 | 35 | 78 |
| arCOG04049 | COG01552 | RPL40A | J | Ribosomal protein L40E                                                        | 1 | 35 | 78 |
| arCOG04186 | COG01890 | RPS1A  | J | Ribosomal protein S3AE                                                        | 1 | 35 | 78 |
| arCOG04473 | COG02097 | RPL31A | J | Ribosomal protein L31E                                                        | 1 | 35 | 78 |
| arCOG04177 | COG02167 | RPL39  | J | Ribosomal protein L39E                                                        | 1 | 35 | 78 |
| arCOG04126 | COG02126 | RPL37A | J | Ribosomal protein L37E                                                        | 1 | 35 | 78 |
| arCOG01742 | COG01503 | eRF1   | J | Peptide chain release factor 1 (eRF1)                                         | 1 | 35 | 78 |
| arCOG04161 | COG01798 | DPH5   | J | Diphthamide biosynthesis methyltransferase                                    | 1 | 35 | 78 |
| arCOG04149 | COG01499 | NMD3   | J | NMD protein affecting ribosome stability and mRNA decay                       | 1 | 35 | 78 |
| arCOG00109 | COG02890 | HemK   | J | Methylase of polypeptide chain release factors                                | 1 | 35 | 77 |
| arCOG00985 | COG02016 | -      | J | Predicted RNA-binding protein (contains PUA domain)                           | 1 | 35 | 77 |
| arCOG00989 | COG00343 | Tgt    | J | Queuine/archaeosine tRNA-ribosyltransferase                                   | 1 | 35 | 77 |
| arCOG01358 | COG00621 | MiaB   | J | 2-methylthioadenine synthetase                                                | 1 | 35 | 77 |
| arCOG04130 | COG01491 | -      | J | Predicted RNA-binding protein                                                 | 1 | 35 | 77 |
| arCOG04176 | COG01976 | TIF6   | J | Translation initiation factor 6 (eIF-6)                                       | 1 | 35 | 77 |
| arCOG04187 | COG01500 | -      | J | Predicted exosome subunit                                                     | 1 | 35 | 77 |
| arCOG00991 | COG01370 | -      | J | tRNA modification protein, contains pre-PUA and PUA domains                   | 1 | 35 | 77 |
| arCOG00906 | COG02260 | -      | J | Predicted Zn-ribbon RNA-binding protein                                       | 1 | 35 | 77 |
| arCOG01989 | COG02888 | -      | J | Predicted Zn-ribbon RNA-binding protein with a function in translation        | 1 | 35 | 76 |
| arCOG01736 | COG01514 | LigT   | J | 2'-5' RNA ligase                                                              | 1 | 35 | 75 |
| arCOG00978 | COG02519 | GCD14  | J | tRNA(1-methyladenosine) methyltransferase                                     | 1 | 35 | 73 |
| arCOG04174 | COG00731 | TYW3   | J | Wybutosine (yW) biosynthesis enzyme, Fe-S oxidoreductase                      | 1 | 35 | 73 |
| arCOG01042 | COG01325 | -      | J | Exosome subunit, RNA binding protein with dsRBD fold                          | 1 | 35 | 68 |
| arCOG04175 | COG02157 | RPL20A | J | Ribosomal protein L20A (L18A)                                                 | 1 | 35 | 67 |
| arCOG00486 | COG00215 | CysS   | J | CysteinyI-tRNA synthetase                                                     | 1 | 35 | 62 |
| arCOG01752 | COG01911 | RPL30  | J | Ribosomal protein L30E                                                        | 1 | 35 | 58 |
| arCOG04318 | COG02178 | -      | J | Predicted RNA-binding protein of the translin family                          | 1 | 35 | 43 |
| arCOG01574 | COG02123 | -      | J | RNase PH-related exoribonuclease                                              | 1 | 35 | 41 |
| arCOG01575 | COG00689 | Rph    | J | Ribonuclease PH                                                               | 1 | 35 | 40 |
| arCOG04167 | COG02163 | RPL14A | J | Ribosomal protein L14E/L6E/L27E                                               | 1 | 35 | 36 |
| arCOG04305 | COG04830 | RPS26B | J | Ribosomal protein S26                                                         | 1 | 35 | 3  |
| arCOG04246 | COG01690 | RtcB   | J | RNA 3'-P ligase, RtcB family protein                                          | 1 | 34 | 78 |
| arCOG00785 | COG00255 | RpmC   | J | Ribosomal protein L29                                                         | 1 | 34 | 78 |
| arCOG00678 | COG01097 | RRP4   | J | RNA-binding protein Rrp4 or related protein (contain S1 domain and KH domain) | 1 | 34 | 39 |
| arCOG04252 | COG00585 | -      | J | tRNA pseudouridine synthase D                                                 | 1 | 33 | 78 |
| arCOG00038 | COG00301 | Thil   | J | tRNA S(4)U 4-thiouridine synthase                                             | 1 | 33 | 76 |
| arCOG04183 | COG01998 | RPS31  | J | Ribosomal protein S27AE                                                       | 1 | 33 | 73 |
| arCOG04156 | COG01590 | TYW3   | J | Wybutosine (yW) biosynthesis enzyme                                           | 1 | 33 | 33 |
| arCOG04168 | COG02174 | RPL34A | J | Ribosomal protein L34E                                                        | 0 | 32 | 36 |
| arCOG00987 | COG00130 | TruB   | J | Pseudouridine synthase                                                        | 1 | 30 | 78 |
| arCOG00967 | COG02419 | -      | J | tRNA m(1)G methyltransferase                                                  | 1 | 29 | 17 |
| arCOG01018 | COG00565 | LasT   | J | rRNA methylase                                                                | 1 | 25 | 72 |
| arCOG04304 | COG02451 | -      | J | Ribosomal protein L35AE/L33A                                                  | 0 | 10 | 13 |
| arCOG04449 | COG00101 | TruA   | J | Pseudouridylate synthase                                                      | 0 | 9  | 77 |
| arCOG00546 | COG00595 | -      | J | mRNA degradation ribonuclease J1/J2 (metallo-beta-lactamase superfamily)      | 0 | 0  | 69 |
| arCOG02285 | COG03270 | -      | J | Ribosome biogenesis protein, NOL1/NOP2/fmu family                             | 0 | 0  | 15 |
| arCOG00122 | COG02265 | TrmA   | J | SAM-dependent methyltransferase related to tRNA (uracil-5-)-methyltransferase | 0 | 0  | 12 |
| arCOG06624 | -        | -      | J | Ribosomal protein L41E                                                        | 0 | 0  | 10 |

|            |          |            |   |                                                                                                                                                    |   |    |    |
|------------|----------|------------|---|----------------------------------------------------------------------------------------------------------------------------------------------------|---|----|----|
| arCOG01695 | COG01293 | -          | K | Predicted RNA-binding protein homologous to eukaryotic snRNP                                                                                       | 1 | 35 | 78 |
| arCOG01762 | COG00085 | RpoB/Rpo2  | K | DNA-directed RNA polymerase subunit B                                                                                                              | 1 | 35 | 78 |
| arCOG04241 | COG00202 | RpoA/Rpo1  | K | DNA-directed RNA polymerase subunit D                                                                                                              | 1 | 35 | 78 |
| arCOG01981 | COG01405 | SUA7       | K | Transcription initiation factor TFIIB, Brf1 subunit/Transcription initiation factor TFIIB                                                          | 1 | 35 | 78 |
| arCOG00675 | COG01095 | RPB7       | K | DNA-directed RNA polymerase, subunit E'                                                                                                            | 1 | 35 | 78 |
| arCOG01016 | COG01460 | -          | K | DNA-directed RNA polymerase, subunit F (rpoF)                                                                                                      | 1 | 35 | 78 |
| arCOG01268 | COG01758 | rpoZ       | K | DNA-directed RNA polymerase, subunit K/omega                                                                                                       | 1 | 35 | 78 |
| arCOG01920 | COG00250 | NusG       | K | Transcription antiterminator NusG                                                                                                                  | 1 | 35 | 78 |
| arCOG04244 | COG01644 | RPB10      | K | DNA-directed RNA polymerase, subunit N (RpoN/RPB10)                                                                                                | 1 | 35 | 78 |
| arCOG04256 | COG00086 | RpoC/Rpo11 | K | DNA-directed RNA polymerase subunit A''                                                                                                            | 1 | 35 | 78 |
| arCOG04257 | COG00086 | RpoC/Rpo3  | K | DNA-directed RNA polymerase subunit A'                                                                                                             | 1 | 35 | 78 |
| arCOG04111 | COG01761 | RPB11      | K | DNA-directed RNA polymerase, subunit L                                                                                                             | 1 | 35 | 78 |
| arCOG04341 | COG01996 | RPC10      | K | DNA-directed RNA polymerase, subunit RPC10 (contains C4-type Zn-finger)                                                                            | 1 | 35 | 78 |
| arCOG01863 | COG01813 | -          | K | Predicted transcription factor, homolog of eukaryotic MBF1                                                                                         | 1 | 35 | 78 |
| arCOG01580 | COG01522 | Lrp        | K | Transcriptional regulator, IclR family                                                                                                             | 1 | 35 | 77 |
| arCOG00579 | COG01594 | RPB9       | K | DNA-directed RNA polymerase, subunit M/Transcription elongation factor TFIIS                                                                       | 1 | 35 | 77 |
| arCOG04258 | COG02012 | RPB5       | K | DNA-directed RNA polymerase, subunit H, RpoH/RPB5                                                                                                  | 1 | 35 | 77 |
| arCOG01764 | COG02101 | SPT15      | K | TATA-box binding protein (TBP), component of TFIID and TFIIB                                                                                       | 1 | 35 | 74 |
| arCOG04270 | COG01675 | TFA1       | K | Transcription initiation factor IIE, alpha subunit                                                                                                 | 1 | 35 | 73 |
| arCOG01753 | COG01581 | Ssh10b     | K | Archaeal DNA-binding protein                                                                                                                       | 1 | 35 | 53 |
| arCOG04077 | COG02093 | Spt4       | K | Transcription elongation factor Spt4/RpoE2, zinc finger protein                                                                                    | 1 | 32 | 78 |
| arCOG02037 | COG01378 | -          | K | Sugar-specific transcriptional regulator TrmB                                                                                                      | 1 | 25 | 61 |
| arCOG00921 | COG01318 | -          | K | Predicted transcriptional regulator                                                                                                                | 0 | 19 | 22 |
| arCOG01526 | COG01110 | -          | L | Reverse gyrase                                                                                                                                     | 1 | 35 | 28 |
| arCOG02144 | COG02036 | HHT1       | L | Histones H3 and H4                                                                                                                                 | 0 | 4  | 73 |
| arCOG01527 | COG00550 | TopA       | L | Topoisomerase IA                                                                                                                                   | 1 | 35 | 78 |
| arCOG01183 | COG00533 | Kae1/QRI7  | L | Subunit of KEOPS complex, contains a domain with ASKHA fold and RIO-type kinase (AP-endonuclease activity)                                         | 1 | 35 | 78 |
| arCOG01347 | COG01793 | CDC9       | L | ATP-dependent DNA ligase                                                                                                                           | 1 | 35 | 76 |
| arCOG00891 | COG00084 | TatD       | L | Mg-dependent DNase                                                                                                                                 | 1 | 34 | 46 |
| arCOG00488 | COG00592 | DnaN       | L | DNA polymerase sliding clamp subunit (PCNA homolog)                                                                                                | 1 | 35 | 78 |
| arCOG00328 | COG00417 | PolB       | L | DNA polymerase elongation subunit (family B)                                                                                                       | 1 | 35 | 78 |
| arCOG00439 | COG01241 | MCM2       | L | Predicted ATPase involved in replication control, Cdc46/Mcm family                                                                                 | 1 | 35 | 78 |
| arCOG00469 | COG00470 | HolB       | L | ATPase involved in DNA replication HolB, small subunit                                                                                             | 1 | 35 | 78 |
| arCOG00470 | COG00470 | HolB       | L | ATPase involved in DNA replication HolB, large subunit                                                                                             | 1 | 35 | 78 |
| arCOG00551 | COG01711 | -          | L | DNA replication initiation complex subunit, GINS15 family                                                                                          | 1 | 35 | 78 |
| arCOG03013 | COG02219 | PR12       | L | Eukaryotic-type DNA primase, large subunit                                                                                                         | 1 | 35 | 78 |
| arCOG04121 | COG00164 | RnhB       | L | Ribonuclease HII                                                                                                                                   | 1 | 35 | 78 |
| arCOG04281 | COG00358 | DnaG       | L | DNA primase (bacterial type)                                                                                                                       | 1 | 35 | 78 |
| arCOG04050 | COG00258 | Exo        | L | 5'-3' exonuclease (including N-terminal domain of Poll)                                                                                            | 1 | 35 | 78 |
| arCOG00280 | COG00433 | -          | L | HerA helicase                                                                                                                                      | 1 | 35 | 77 |
| arCOG00397 | COG00420 | SbcD       | L | DNA repair exonuclease, SbcD                                                                                                                       | 1 | 35 | 77 |
| arCOG01165 | COG01389 | -          | L | DNA topoisomerase VI, subunit B                                                                                                                    | 1 | 35 | 74 |
| arCOG04143 | COG01697 | -          | L | DNA topoisomerase VI, subunit A                                                                                                                    | 1 | 35 | 74 |
| arCOG00928 | COG01628 | -          | L | Endonuclease V homolog                                                                                                                             | 1 | 35 | 71 |
| arCOG00467 | COG01474 | CDC6       | L | Cdc6-related protein, AAA superfamily ATPase                                                                                                       | 1 | 35 | 62 |
| arCOG00919 | COG01591 | -          | L | Holliday junction resolvase                                                                                                                        | 1 | 35 | 61 |
| arCOG00905 | COG01573 | -          | L | Uracil-DNA glycosylase                                                                                                                             | 1 | 35 | 47 |
| arCOG00368 | COG00419 | SbcC       | L | ATPase involved in DNA repair, SbcC                                                                                                                | 1 | 34 | 77 |
| arCOG01894 | COG00648 | Nfo        | L | Endonuclease IV                                                                                                                                    | 1 | 34 | 76 |
| arCOG00284 | COG00433 | -          | L | HerA helicase                                                                                                                                      | 1 | 27 | 7  |
| arCOG01510 | COG01599 | RFA1       | L | Single-stranded DNA-binding replication protein A (RPA), large (70 kD) subunit or related ssDNA-binding protein                                    | 1 | 24 | 78 |
| arCOG04144 | COG04047 | -          | L | 8-oxoguanine DNA glycosylase                                                                                                                       | 0 | 22 | 24 |
| arCOG00048 | COG00116 | -          | L | Predicted N6-adenine-specific DNA methylase                                                                                                        | 0 | 17 | 26 |
| arCOG00424 | COG00608 | -          | L | DHH superfamily phosphohydrolase/exonuclease                                                                                                       | 0 | 12 | 8  |
| arCOG04447 | COG01933 | -          | L | Archaeal DNA polymerase II, large subunit                                                                                                          | 0 | 0  | 78 |
| arCOG04455 | COG01311 | HYS2       | L | Archaeal DNA polymerase II, small subunit/DNA polymerase delta, subunit B                                                                          | 0 | 0  | 77 |
| arCOG00872 | COG01111 | MPH1       | L | ERCC4-like helicase                                                                                                                                | 0 | 0  | 76 |
| arCOG00663 | COG01208 | GCD1       | M | Nucleoside-diphosphate-sugar pyrophosphorylase involved in lipopolysaccharide biosynthesis/translation initiation factor 2B, gamma/epsilon subunit | 1 | 35 | 20 |
| arCOG02079 | COG01361 | -          | M | S-layer domain                                                                                                                                     | 1 | 5  | 55 |
| arCOG04064 | COG00750 | -          | M | Predicted membrane-associated Zn-dependent protease                                                                                                | 1 | 35 | 78 |
| arCOG03199 | COG00472 | Rfe        | M | UDP-N-acetylmuramyl pentapeptide phosphotransferase/UDP-N-acetylglucosamine-1-phosphate transferase                                                | 1 | 35 | 39 |
| arCOG01817 | COG00630 | VirB11     | N | Type IV secretory pathway, VirB11 component, or related ATPase involved in archaeal flagella biosynthesis                                          | 1 | 35 | 64 |
| arCOG01814 | COG00630 | VirB11     | N | Type II secretion system protein F                                                                                                                 | 0 | 0  | 19 |
| arCOG01818 | COG00630 | VirB11     | N | Type IV secretory pathway, VirB11 component, or related ATPase involved in archaeal flagella biosynthesis                                          | 0 | 7  | 25 |
| arCOG01308 | COG00464 | Cdc48      | O | ATPase of the AAA+ class, CDC48 family                                                                                                             | 4 | 35 | 78 |
| arCOG00970 | COG00638 | PRE1       | O | 20S proteasome, beta subunit                                                                                                                       | 1 | 35 | 78 |
| arCOG01257 | COG00459 | GroL       | O | Chaperonin GroEL (HSP60 family)                                                                                                                    | 1 | 35 | 78 |
| arCOG00980 | COG01047 | SlpA       | O | FKBP-type peptidyl-prolyl cis-trans isomerase 2                                                                                                    | 1 | 35 | 78 |

|            |          |        |   |                                                                                                                 |   |    |    |
|------------|----------|--------|---|-----------------------------------------------------------------------------------------------------------------|---|----|----|
| arCOG01341 | COG01730 | GIM5   | O | Predicted prefoldin, molecular chaperone implicated in de novo protein folding                                  | 1 | 35 | 78 |
| arCOG01342 | COG01382 | GimC   | O | Prefoldin, chaperonin cofactor                                                                                  | 1 | 35 | 78 |
| arCOG04142 | COG01899 | DYS1   | O | Deoxyhypusine synthase                                                                                          | 1 | 35 | 78 |
| arCOG00971 | COG00638 | PRE1   | O | 20S proteasome, alpha subunit                                                                                   | 1 | 35 | 77 |
| arCOG01296 | COG00492 | TrxB   | O | Thioredoxin reductase                                                                                           | 1 | 35 | 74 |
| arCOG01218 | COG00526 | TrxA   | O | Thiol-disulfide isomerase or thioredoxin                                                                        | 1 | 35 | 32 |
| arCOG00312 | COG00450 | AhpC   | O | Peroxioredoxin                                                                                                  | 1 | 34 | 56 |
| arCOG01832 | COG00071 | IbpA   | O | Molecular chaperone (HSP20 family)                                                                              | 1 | 27 | 78 |
| arCOG02160 | COG01067 | LonB   | O | Predicted ATP-dependent protease                                                                                | 0 | 0  | 77 |
| arCOG04347 | COG00500 | -      | Q | SAM-dependent methyltransferase                                                                                 | 0 | 3  | 49 |
| arCOG01937 | COG01750 | -      | R | Archaeal serine protease                                                                                        | 0 | 25 | 33 |
| arCOG00557 | COG01201 | Lhr    | R | Lhr-like helicase                                                                                               | 1 | 35 | 75 |
| arCOG01204 | COG01708 | -      | R | Minimal nucleotidyltransferase                                                                                  | 1 | 25 | 11 |
| arCOG01951 | COG01444 | -      | R | Predicted P-loop ATPase fused to an acetyltransferase                                                           | 1 | 35 | 36 |
| arCOG02155 | COG01873 | -      | R | Protein implicated in RNA metabolism, contains PRC-barrel domain                                                | 0 | 0  | 76 |
| arCOG00589 | COG00455 | -      | R | CobQ/CobB/MinD/ParA ATPase                                                                                      | 0 | 8  | 60 |
| arCOG00187 | COG01245 | -      | R | Predicted ATPase, RNase L inhibitor (RLI) homolog                                                               | 1 | 35 | 78 |
| arCOG00358 | COG01163 | DRG    | R | Predicted GTPase                                                                                                | 1 | 35 | 78 |
| arCOG00501 | COG01234 | ElaC   | R | Metal-dependent hydrolase of the beta-lactamase superfamily                                                     | 1 | 35 | 78 |
| arCOG00543 | COG01782 | -      | R | Predicted metal-dependent RNase, consists of a metallo-beta-lactamase domain and an RNA-binding KH domain       | 1 | 35 | 78 |
| arCOG04116 | COG01855 | -      | R | ATPase (PiT family)                                                                                             | 1 | 35 | 78 |
| arCOG04150 | COG01094 | -      | R | Predicted RNA-binding protein (contains KH domains)                                                             | 1 | 35 | 78 |
| arCOG04179 | COG02118 | -      | R | DNA-binding protein                                                                                             | 1 | 35 | 78 |
| arCOG00035 | COG02102 | -      | R | Predicted ATPase of PP-loop superfamily                                                                         | 1 | 35 | 78 |
| arCOG00352 | COG01084 | -      | R | Predicted GTPase                                                                                                | 1 | 35 | 78 |
| arCOG04312 | COG01412 | -      | R | PIN domain containing protein                                                                                   | 1 | 35 | 77 |
| arCOG01150 | COG01407 | -      | R | Predicted ICC-like phosphoesterase                                                                              | 1 | 35 | 74 |
| arCOG04055 | COG01371 | -      | R | SHS2 domain protein implicated in nucleic acid metabolism                                                       | 1 | 35 | 74 |
| arCOG01728 | COG01355 | -      | R | Predicted dioxygenase                                                                                           | 1 | 35 | 63 |
| arCOG01845 | COG02151 | PaaD   | R | Predicted metal-sulfur cluster biosynthetic enzyme                                                              | 1 | 35 | 56 |
| arCOG04219 | COG02433 | -      | R | Possible nuclease of RNase H fold, RuvC/YggF family                                                             | 1 | 35 | 53 |
| arCOG00969 | COG02248 | -      | R | Predicted hydrolase (metallo-beta-lactamase superfamily)                                                        | 1 | 35 | 30 |
| arCOG04265 | COG01779 | -      | R | C4-type Zn-finger protein                                                                                       | 1 | 34 | 62 |
| arCOG00324 | COG00123 | AcuC   | R | Deacetylase, including yeast histone deacetylase and acetoin utilization protein                                | 1 | 34 | 51 |
| arCOG02044 | COG01287 | -      | R | Uncharacterized membrane protein, required for N-linked glycosylation                                           | 1 | 34 | 39 |
| arCOG00350 | COG01161 | -      | R | Predicted GTPase                                                                                                | 1 | 34 | 33 |
| arCOG01145 | COG02129 | -      | R | Icc family phosphoesterase                                                                                      | 1 | 33 | 65 |
| arCOG00017 | COG02522 | -      | R | Predicted transcriptional regulator                                                                             | 1 | 32 | 33 |
| arCOG02960 | COG04882 | -      | R | Predicted aminopeptidase, lap family                                                                            | 1 | 32 | 0  |
| arCOG04702 | COG01881 | -      | R | Phospholipid-binding protein                                                                                    | 1 | 25 | 46 |
| arCOG00769 | COG00693 | ThiJ   | R | Putative intracellular protease/amidase                                                                         | 1 | 24 | 69 |
| arCOG02209 | COG02244 | RfbX   | R | Polysaccharide biosynthesis protein, Mvin family                                                                | 0 | 21 | 76 |
| arCOG02900 | COG02304 | -      | R | Uncharacterized protein containing a von Willebrand factor type A (vWA) domain                                  | 1 | 19 | 21 |
| arCOG00601 | COG00517 | -      | R | Protein containing two CBS domains (some fused to C-terminal double-stranded RNA-binding domain of RaiA family) | 1 | 18 | 57 |
| arCOG01744 | COG01988 | -      | R | Membrane-bound metal-dependent hydrolase                                                                        | 0 | 9  | 29 |
| arCOG01688 | COG01719 | -      | R | Predicted transcriptional regulator, contains HTH and 4VR domain                                                | 0 | 7  | 40 |
| arCOG00438 | COG01239 | -      | R | AAA family ATPase                                                                                               | 0 | 5  | 50 |
| arCOG02261 | -        | -      | R | Protein containing OB-fold-like and PCI domains                                                                 | 0 | 0  | 16 |
| arCOG01159 | COG01340 | -      | S | Uncharacterized archaeal coiled-coil protein                                                                    | 1 | 35 | 66 |
| arCOG01572 | -        | -      | S | Uncharacterized conserved membrane protein                                                                      | 1 | 28 | 17 |
| arCOG04214 | COG00432 | -      | S | Uncharacterized conserved protein                                                                               | 1 | 35 | 65 |
| arCOG00398 | COG02411 | -      | S | ASCH domain, predicted RNA-binding domain                                                                       | 0 | 20 | 24 |
| arCOG01994 | COG01300 | SpoIIM | S | Uncharacterized membrane protein                                                                                | 0 | 6  | 64 |
| arCOG06946 | -        | -      | S | Uncharacterized conserved membrane protein                                                                      | 0 | 3  | 0  |
| arCOG05037 | -        | -      | S | Uncharacterized conserved protein                                                                               | 0 | 0  | 27 |
| arCOG01180 | COG01718 | RIO1   | T | Serine/threonine protein kinase involved in cell cycle control                                                  | 1 | 35 | 78 |
| arCOG01185 | COG03642 | -      | T | Mn2+-dependent serine/threonine protein kinase                                                                  | 1 | 35 | 78 |
| arCOG01182 | COG02112 | -      | T | Predicted Ser/Thr protein kinase                                                                                | 1 | 34 | 31 |
| arCOG01171 | COG00467 | RAD55  | T | RecA-superfamily ATPase implicated in signal transduction                                                       | 1 | 33 | 58 |
| arCOG04471 | COG04083 | -      | U | Exosortase                                                                                                      | 0 | 2  | 55 |
| arCOG04169 | COG00201 | SecY   | U | Preprotein translocase subunit SecY                                                                             | 1 | 35 | 78 |
| arCOG02204 | COG02443 | Sss1   | U | Preprotein translocase subunit Sss1                                                                             | 1 | 35 | 78 |
| arCOG01739 | COG00681 | LepB   | U | Signal peptidase I                                                                                              | 1 | 33 | 77 |
| arCOG03054 | COG00341 | SecF   | U | Preprotein translocase subunit SecF                                                                             | 0 | 0  | 68 |
| arCOG03055 | COG00342 | SecD   | U | Preprotein translocase subunit SecD                                                                             | 0 | 0  | 68 |
| arCOG00793 | COG01468 | -      | V | CRISPR-associated protein, Cas4 family, PD-(D/E)XK superfamily nuclease                                         | 0 | 0  | 28 |
