# Supplementary material for: Insights into archaeal evolution and symbiosis from the genomes of a nanoarchaeon and its inferred crenarchaeal host from Obsidian Pool, Yellowstone National Park
Source: Springer Nature journal article supplement (doi:10.1186/1745-6150-8-9), 2013-04-22
Supplement: 13062_2013_372_MOESM7_ESM.pdf [file 13062_2013_372_MOESM7_ESM.pdf]

**Additional file 7. Gene gain and loss in Nanoarchaeota and in Sulfolobales**

|                                   | arCOG Family                      | COG correspondence | Gene Name | Functional group                   | Annotation                                                                                                |                                                                                                                |
|-----------------------------------|-----------------------------------|--------------------|-----------|------------------------------------|-----------------------------------------------------------------------------------------------------------|----------------------------------------------------------------------------------------------------------------|
| <b>Gain in both Nanoarchaeota</b> | arCOG00122                        | COG02265           | TrmA      | J                                  | SAM-dependent methyltransferase related to tRNA (uracil-5-)-methyltransferase                             |                                                                                                                |
|                                   | arCOG00284                        | COG00433           |           | L                                  | HerA helicase                                                                                             |                                                                                                                |
|                                   | arCOG00424                        | COG00608           |           | L                                  | DHH superfamily phosphohydrolase/exonuclease                                                              |                                                                                                                |
|                                   | arCOG01814                        |                    | N         | Type II secretion system protein F |                                                                                                           |                                                                                                                |
|                                   | arCOG01818                        | COG00630           | VirB11    | N                                  | Type IV secretory pathway, VirB11 component, or related ATPase involved in archaeal flagella biosynthesis |                                                                                                                |
|                                   | arCOG00438                        | COG01239           |           | R                                  | AAA family ATPase                                                                                         |                                                                                                                |
|                                   | arCOG02261                        |                    |           | R                                  | Protein containing OB-fold-like and PCI domains                                                           |                                                                                                                |
|                                   | arCOG06946                        |                    |           | S                                  | Uncharacterized conserved membrane protein                                                                |                                                                                                                |
|                                   | arCOG01572                        |                    |           | S                                  | Uncharacterized conserved membrane protein                                                                |                                                                                                                |
|                                   | arCOG05037                        |                    |           | S                                  | Uncharacterized conserved protein                                                                         |                                                                                                                |
|                                   | arCOG00793                        | COG01468           |           | V                                  | CRISPR-associated protein, Cas4 family, PD-(D/E)XK superfamily nuclease                                   |                                                                                                                |
|                                   | arCOG04471                        | COG04083           |           | U                                  | Exosortase                                                                                                |                                                                                                                |
|                                   | <b>Loss in both Nanoarchaeota</b> | arCOG00570         | COG00644  | FixC                               | C                                                                                                         | Dehydrogenase (flavoprotein)                                                                                   |
|                                   |                                   | arCOG01068         | COG01249  | Lpd                                | C                                                                                                         | Pyruvate/2-oxoglutarate dehydrogenase complex, dihydrolipoamide dehydrogenase (E3) component or related enzyme |
|                                   |                                   | arCOG00333         | COG00247  | GlpC                               | C                                                                                                         | Fe-S oxidoreductase                                                                                            |
|                                   |                                   | arCOG00335         | COG01139  | -                                  | C                                                                                                         | Uncharacterized conserved protein containing ferredoxin-like domain                                            |
| arCOG00338                        |                                   | COG02048           | SdhC      | C                                  | Succinate dehydrogenase subunit C                                                                         |                                                                                                                |
| arCOG01357                        |                                   | COG01032           | -         | C                                  | Radical SAM superfamily enzyme                                                                            |                                                                                                                |
| arCOG01491                        |                                   | COG00243           | BisC      | C                                  | Anaerobic dehydrogenase                                                                                   |                                                                                                                |
| arCOG01537                        |                                   | COG00651           | NuoM      | C                                  | NADH:ubiquinone oxidoreductase subunit 4 (chain M)                                                        |                                                                                                                |
| arCOG01539                        |                                   | COG01009           | NuoL      | C                                  | NADH dehydrogenase subunit L                                                                              |                                                                                                                |
| arCOG01554                        |                                   | COG00377           | NuoB      | C                                  | F420H2 dehydrogenase subunit, related to NADH:ubiquinone oxidoreductase 20 kD subunit                     |                                                                                                                |
| arCOG00337                        |                                   | COG00277           | GlcD      | C                                  | FAD/FMN-containing dehydrogenase                                                                          |                                                                                                                |
| arCOG00506                        |                                   | COG00426           | FpaA      | C                                  | Uncharacterized flavoprotein                                                                              |                                                                                                                |
| arCOG00571                        |                                   | COG01053           | SdhA      | C                                  | Succinate dehydrogenase/fumarate reductase, flavoprotein subunit                                          |                                                                                                                |
| arCOG00853                        |                                   | COG00281           | SfcA      | C                                  | Malic enzyme                                                                                              |                                                                                                                |
| arCOG00869                        |                                   | COG01390           | NtpE      | C                                  | Archaeal/vacuolar-type H <sup>+</sup> -ATPase subunit E                                                   |                                                                                                                |
| arCOG00934                        |                                   | COG01313           | PflX      | C                                  | Radical SAM superfamily enzyme                                                                            |                                                                                                                |
| arCOG00982                        |                                   | COG00371           | GldA      | C                                  | Glycerol dehydrogenase or related enzyme                                                                  |                                                                                                                |
| arCOG01097                        |                                   | COG01592           | -         | C                                  | Rubryerythrin                                                                                             |                                                                                                                |
| arCOG01163                        |                                   | COG00473           | LeuB      | C                                  | Isocitrate/isopropylmalate dehydrogenase                                                                  |                                                                                                                |
| arCOG01337                        |                                   | COG00045           | SucC      | C                                  | Succinyl-CoA synthetase, beta subunit                                                                     |                                                                                                                |
| arCOG01339                        |                                   | COG00074           | SucD      | C                                  | Succinyl-CoA synthetase, alpha subunit                                                                    |                                                                                                                |
| arCOG01462                        |                                   | COG01668           | NatB      | C                                  | ABC-type Na <sup>+</sup> efflux pump, permease component                                                  |                                                                                                                |
| arCOG01500                        |                                   | COG00437           | HybA      | C                                  | Fe-S-cluster-containing dehydrogenase component                                                           |                                                                                                                |
| arCOG01540                        |                                   | COG01007           | NuoN      | C                                  | NADH dehydrogenase subunit N                                                                              |                                                                                                                |
| arCOG01543                        |                                   | COG01143           | NuoI      | C                                  | NADH dehydrogenase subunit I                                                                              |                                                                                                                |
| arCOG01545                        |                                   | COG00650           | HyfC      | C                                  | Formate hydrogenlyase subunit 4                                                                           |                                                                                                                |
| arCOG01546                        |                                   | COG01005           | NuoH      | C                                  | NADH dehydrogenase subunit H                                                                              |                                                                                                                |
| arCOG01547                        |                                   | COG03261           | HycE      | C                                  | Ni,Fe-hydrogenase III large subunit and subunit G                                                         |                                                                                                                |
| arCOG01548                        |                                   | COG00649           | NuoD      | C                                  | NADH dehydrogenase subunit D                                                                              |                                                                                                                |
| arCOG01551                        |                                   | COG00852           | NuoC      | C                                  | NADH dehydrogenase subunit C                                                                              |                                                                                                                |
| arCOG01553                        |                                   | COG03260           | -         | C                                  | Ni,Fe-hydrogenase III small subunit                                                                       |                                                                                                                |
| arCOG01557                        |                                   | COG00838           | NuoA      | C                                  | NADH dehydrogenase subunit A                                                                              |                                                                                                                |

|            |          |      |   |                                                                                                  |
|------------|----------|------|---|--------------------------------------------------------------------------------------------------|
| arCOG01601 | COG01013 | PorB | C | Pyruvate:ferredoxin oxidoreductase or related 2-oxoacid:ferredoxin oxidoreductase, beta subunit  |
| arCOG01603 | COG01014 | PorG | C | Pyruvate:ferredoxin oxidoreductase or related 2-oxoacid:ferredoxin oxidoreductase, gamma subunit |
| arCOG01605 | COG01144 | -    | C | Pyruvate:ferredoxin oxidoreductase or related 2-oxoacid:ferredoxin oxidoreductase, delta subunit |
| arCOG01608 | COG00674 | PorA | C | Pyruvate:ferredoxin oxidoreductase or related 2-oxoacid:ferredoxin oxidoreductase, alpha subunit |
| arCOG01755 | COG01052 | LdhA | C | Lactate dehydrogenase or related 2-hydroxyacid dehydrogenase                                     |
| arCOG02235 | COG01148 | HdrA | C | Heterodisulfide reductase, subunit A or related polyferredoxin                                   |
| arCOG02459 | COG01527 | NtpC | C | Archaeal/vacuolar-type H <sup>+</sup> -ATPase subunit C                                          |
| arCOG03073 | COG00713 | NuoK | C | NADH dehydrogenase subunit 4L (K,kappa)                                                          |
| arCOG04102 | COG01436 | NtpG | C | Archaeal/vacuolar-type H <sup>+</sup> -ATPase subunit F                                          |
| arCOG04237 | COG00372 | GltA | C | Citrate synthase                                                                                 |
| arCOG04329 | COG02441 | -    | C | Predicted butyrate kinase                                                                        |
| arCOG04429 | COG00680 | HyaD | C | Ni,Fe-hydrogenase maturation factor                                                              |
| arCOG00024 | COG00554 | GlpK | C | Glycerol kinase                                                                                  |
| arCOG00104 | COG01795 | -    | C | Formaldehyde-activating enzyme necessary for methanogenesis                                      |
| arCOG00246 | COG00039 | Mdh  | C | Malate/lactate dehydrogenase                                                                     |
| arCOG00296 | COG01145 | NapF | C | Ferredoxin                                                                                       |
| arCOG00509 | COG00426 | FpaA | C | Uncharacterized flavoprotein                                                                     |
| arCOG00701 | COG00584 | UgpQ | C | Glycerophosphoryl diester phosphodiesterase                                                      |
| arCOG00706 | COG02414 | -    | C | Aldehyde:ferredoxin oxidoreductase                                                               |
| arCOG00762 | COG02191 | -    | C | Formylmethanofuran dehydrogenase subunit E                                                       |
| arCOG00958 | COG01145 | NapF | C | Ferredoxin                                                                                       |
| arCOG00959 | COG01146 | -    | C | Ferredoxin                                                                                       |
| arCOG00964 | COG01150 | HdrC | C | Heterodisulfide reductase, subunit C                                                             |
| arCOG00984 | COG01454 | EutG | C | Alcohol dehydrogenase, class IV                                                                  |
| arCOG01355 | COG01032 | -    | C | Radical SAM superfamily enzyme                                                                   |
| arCOG01359 | COG01031 | -    | C | Radical SAM superfamily enzyme                                                                   |
| arCOG01502 | COG01142 | HycB | C | Fe-S-cluster-containing hydrogenase component 2                                                  |
| arCOG01549 | COG03259 | FrhA | C | Coenzyme F420-reducing hydrogenase, alpha subunit                                                |
| arCOG01602 | COG01014 | PorG | C | Pyruvate:ferredoxin oxidoreductase or related 2-oxoacid:ferredoxin oxidoreductase, gamma subunit |
| arCOG01607 | COG00674 | PorA | C | Pyruvate:ferredoxin oxidoreductase or related 2-oxoacid:ferredoxin oxidoreductase, alpha subunit |
| arCOG01609 | COG04231 | -    | C | Indolepyruvate ferredoxin oxidoreductase, alpha and beta subunit                                 |
| arCOG01705 | COG01036 | -    | C | Archaeal flavoprotein                                                                            |
| arCOG02077 | COG00822 | IscU | C | NifU homolog involved in Fe-S cluster formation                                                  |
| arCOG02095 | COG05016 | -    | C | Pyruvate/oxaloacetate carboxyltransferase                                                        |
| arCOG02236 | COG01148 | HdrA | C | Heterodisulfide reductase, subunit A or related polyferredoxin                                   |
| arCOG02429 | COG01151 | -    | C | 6Fe-6S prismatic cluster-containing protein                                                      |
| arCOG02461 | COG01146 | -    | C | Ferredoxin                                                                                       |
| arCOG02472 | COG01941 | FrhG | C | Coenzyme F420-reducing hydrogenase, gamma subunit                                                |
| arCOG02475 | COG01908 | FrhD | C | Coenzyme F420-reducing hydrogenase, delta subunit                                                |
| arCOG02740 | COG01600 | -    | C | Uncharacterized Fe-S protein                                                                     |
| arCOG03363 | COG02811 | NtpF | C | Archaeal/vacuolar-type H <sup>+</sup> -ATPase subunit H                                          |
| arCOG04073 | COG01149 | -    | C | MinD superfamily P-loop ATPase containing an inserted ferredoxin domain                          |
| arCOG04279 | COG01786 | -    | C | Swiveling domain associated with predicted aconitase                                             |

|            |          |      |       |                                                                                    |
|------------|----------|------|-------|------------------------------------------------------------------------------------|
| arCOG04358 | COG01526 | FdhD | C     | Uncharacterized protein required for formate dehydrogenase activity                |
| arCOG04386 | COG01620 | LldP | C     | L-lactate permease                                                                 |
| arCOG04391 | COG01773 | -    | C     | Rubredoxin                                                                         |
| arCOG04406 | COG01838 | FumA | C     | Tartrate dehydratase beta subunit/Fumarate hydratase class I, C-terminal domain    |
| arCOG04407 | COG01951 | TtdA | C     | Tartrate dehydratase alpha subunit/Fumarate hydratase class I, N-terminal domain   |
| arCOG04537 | COG01894 | NuoF | C     | NADH:ubiquinone oxidoreductase, NADH-binding (51 kD) subunit                       |
| arCOG04874 | COG02055 | -    | C     | Malate/L-lactate dehydrogenase                                                     |
| arCOG04890 | COG01905 | NuoE | C     | NADH:ubiquinone oxidoreductase 24 kD subunit                                       |
| arCOG05014 | COG02181 | HdrE | C     | CoB--CoM heterodisulfide reductase subunit E                                       |
| arCOG05128 | COG01145 | NapF | C     | Ferredoxin                                                                         |
| arCOG06130 | COG01882 | PflD | C     | Pyruvate-formate lyase                                                             |
| arCOG03483 | COG01203 | V    | Cas3d | CRISPR system related helicase, Cas3 (C-terminal HD nuclease domain)               |
| arCOG00585 | COG00489 | Mrp  | D     | Mrp family protein, ATPase, contains iron-sulfur cluster                           |
| arCOG00586 | COG01192 | Soj  | D     | ATPase involved in chromosome partitioning, ParA family                            |
| arCOG01307 | COG00464 | Vps4 | D     | Cell division ATPase of the AAA+ class, ESCRT system component                     |
| arCOG00370 | COG01196 | Smc  | D     | Chromosome segregation ATPase                                                      |
| arCOG00587 | COG03640 | CooC | D     | CO dehydrogenase maturation factor                                                 |
| arCOG00588 | COG03640 | CooC | D     | CO dehydrogenase maturation factor                                                 |
| arCOG04701 | COG00239 | CrcB | D     | Integral membrane protein possibly involved in chromosome condensation             |
| arCOG01303 | COG00509 | GcvH | E     | Glycine cleavage system H protein (lipoyl-binding)                                 |
| arCOG01698 | COG00065 | LeuC | E     | Homoaconitate hydratase/3-isopropylmalate dehydratase large subunit family protein |
| arCOG02092 | COG00119 | LeuA | E     | Isopropylmalate/homocitrate/citramalate synthase                                   |
| arCOG00082 | COG00075 | -    | E     | Serine-pyruvate aminotransferase/archaeal aspartate aminotransferase               |
| arCOG00279 | COG01586 | SpeD | E     | S-adenosylmethionine                                                               |
| arCOG00494 | COG00136 | Asd  | E     | decarboxylase/arginine decarboxylase                                               |
| arCOG00619 | COG00069 | GltB | E     | Aspartate-semialdehyde dehydrogenase                                               |
| arCOG00912 | COG00078 | ArgF | E     | Glutamate synthase domain 2 and ferredoxin domain                                  |
| arCOG01035 | COG02423 | -    | E     | Ornithine carbamoyltransferase                                                     |
| arCOG01351 | COG00460 | ThrA | E     | Alanine dehydrogenase, mu-crystallin homolog                                       |
| arCOG01594 | COG00458 | CarB | E     | Homoserine dehydrogenase                                                           |
| arCOG01909 | COG00174 | GlnA | E     | Carbamoylphosphate synthase large subunit                                          |
| arCOG02230 | COG00066 | LeuD | E     | Glutamine synthetase                                                               |
| arCOG04273 | COG00079 | HisC | E     | 3-isopropylmalate dehydratase small subunit                                        |
| arCOG00009 | COG00531 | PotE | E     | Histidinol-phosphate/aromatic aminotransferase or cobyric acid decarboxylase       |
| arCOG00050 | COG00421 | SpeE | E     | Amino acid transporter                                                             |
| arCOG00060 | COG00626 | MetC | E     | Spermidine synthase                                                                |
| arCOG00064 | COG00505 | CarA | E     | Cystathionine beta-lyase/cystathionine gamma-synthase                              |
| arCOG00070 | COG00112 | GlyA | E     | Carbamoylphosphate synthase small subunit                                          |
| arCOG00076 | COG01003 | GcvP | E     | Glycine/serine hydroxymethyltransferase                                            |
| arCOG00077 | COG00403 | GcvP | E     | Glycine cleavage system protein P (pyridoxal-binding), C-terminal domain           |
| arCOG00086 | COG00512 | PabA | E     | Glycine cleavage system protein P (pyridoxal-binding), N-terminal domain           |
| arCOG00089 | COG00118 | HisH | E     | Anthranilate/para-aminobenzoate synthase component II                              |
| arCOG00095 | COG00067 | GltB | E     | Glutamine amidotransferase                                                         |
|            |          |      |       | Glutamate synthase domain 1                                                        |

|            |          |      |   |                                                                                                       |
|------------|----------|------|---|-------------------------------------------------------------------------------------------------------|
| arCOG00096 | COG00070 | GltB | E | Glutamate synthase domain 3                                                                           |
| arCOG00112 | COG00137 | ArgG | E | Argininosuccinate synthase                                                                            |
| arCOG00181 | COG00444 | DppD | E | ABC-type dipeptide/oligopeptide/nickel transport system, ATPase component                             |
| arCOG00184 | COG04608 | AppF | E | ABC-type oligopeptide transport system, ATPase component                                              |
| arCOG00495 | COG00002 | ArgC | E | Acetylglutamate semialdehyde dehydrogenase                                                            |
| arCOG00617 | COG00107 | HisF | E | Imidazoleglycerol-phosphate synthase                                                                  |
| arCOG00618 | COG00106 | HisA | E | Phosphoribosylformimino-5-aminoimidazole carboxamide ribonucleotide (ProFAR) isomerase                |
| arCOG00749 | COG01173 | DppC | E | ABC-type dipeptide/oligopeptide/nickel transport system, permease component                           |
| arCOG00751 | COG00601 | DppB | E | ABC-type dipeptide/oligopeptide/nickel transport system, permease component                           |
| arCOG00755 | COG00665 | DadA | E | Glycine/D-amino acid oxidase (deaminating) Glycine cleavage system T protein (aminomethyltransferase) |
| arCOG00756 | COG00404 | GcvT | E | Aspartokinase                                                                                         |
| arCOG00861 | COG00527 | LysC | E | Acetylglutamate kinase                                                                                |
| arCOG00862 | COG00548 | ArgB | E | Ornithine/acetylornithine aminotransferase                                                            |
| arCOG00914 | COG04992 | ArgD | E | Xaa-Pro aminopeptidase                                                                                |
| arCOG01000 | COG00006 | PepP | E | Archaeal shikimate kinase                                                                             |
| arCOG01025 | COG01685 | -    | E | Homoserine kinase                                                                                     |
| arCOG01027 | COG00083 | ThrB | E | Shikimate 5-dehydrogenase                                                                             |
| arCOG01033 | COG00169 | AroE | E | Tryptophan synthase alpha chain                                                                       |
| arCOG01086 | COG00159 | TrpA | E | Indole-3-glycerol phosphate synthase                                                                  |
| arCOG01088 | COG00134 | TrpC | E | Aspartate/tyrosine/aromatic aminotransferase                                                          |
| arCOG01130 | COG00436 | -    | E | Putative periplasmic protein kinase ArgK or related GTPase of G3E family                              |
| arCOG01226 | COG01703 | ArgK | E | Na <sup>+</sup> /proline symporter                                                                    |
| arCOG01316 | COG00591 | PutP | E | Cysteine synthase                                                                                     |
| arCOG01430 | COG00031 | CysK | E | Threonine synthase and cysteate synthase                                                              |
| arCOG01434 | COG00498 | ThrC | E | Threonine dehydrogenase or related Zn-dependent dehydrogenase                                         |
| arCOG01459 | COG01063 | Tdh  | E | lysine biosynthesis protein LysW                                                                      |
| arCOG01588 |          | LysW | E | Dipeptidyl aminopeptidase/acylaminoacyl-peptidase                                                     |
| arCOG01646 | COG01506 | DAP2 | E | Archaeal S-adenosylmethionine synthetase                                                              |
| arCOG01678 | COG01812 | MetK | E | Argininosuccinate lyase                                                                               |
| arCOG01748 | COG00165 | ArgH | E | Membrane associated serine protease                                                                   |
| arCOG01768 | COG00705 | GlpG | E | Methionine synthase II (cobalamin-independent)                                                        |
| arCOG01876 | COG00620 | MetE | E | Putative threonine efflux protein                                                                     |
| arCOG01947 | COG01280 | RhtB | E | Phosphoribosylanthranilate isomerase                                                                  |
| arCOG01983 | COG00135 | TrpF | E | Acetolactate synthase large subunit or other thiamine pyrophosphate-requiring enzyme                  |
| arCOG01998 | COG00028 | IlvB | E | Anthranilate phosphoribosyltransferase                                                                |
| arCOG02012 | COG00547 | TrpD | E | Anthranilate/para-aminobenzoate synthase component I                                                  |
| arCOG02014 | COG00147 | TrpE | E | ATP phosphoribosyltransferase                                                                         |
| arCOG02208 | COG00040 | HisG | E | Phosphoribosyl-AMP cyclohydrolase                                                                     |
| arCOG02676 | COG00139 | HisI | E | Phosphoribosyl-ATP pyrophosphohydrolase                                                               |
| arCOG02677 | COG00140 | HisI | E | Lactoylglutathione lyase or related enzyme                                                            |
| arCOG02706 | COG00346 | GloA | E | 2-amino-3,7-dideoxy-D-threo-hept-6-ulosonic acid synthase, DhNA-aldolase family                       |
| arCOG04044 | COG01830 |      | E | Dihydroxyacid dehydratase/phosphogluconate dehydratase                                                |
| arCOG04045 | COG00129 | IlvD | E | Chorismate synthase                                                                                   |
| arCOG04133 | COG00082 | AroC | E | 5-enolpyruvylshikimate-3-phosphate synthase                                                           |
| arCOG04134 | COG00128 | AroA | E | Dihydrodipicolinate synthase/N-acetylneuraminatase lyase                                              |
| arCOG04172 | COG00329 | DapA | E | Histidinol dehydrogenase                                                                              |
| arCOG04352 | COG00141 | HisD | E | Imidazoleglycerol-phosphate dehydratase                                                               |
| arCOG04398 | COG00131 | HisB | E | Ketol-acid reductoisomerase                                                                           |
| arCOG04465 | COG00059 | IlvC | E |                                                                                                       |

|            |          |      |   |                                                                                                                                 |
|------------|----------|------|---|---------------------------------------------------------------------------------------------------------------------------------|
| arCOG04779 | COG01446 | -    | E | Asparaginase                                                                                                                    |
| arCOG00066 | COG01104 | NifS | E | Cysteine sulfinatase desulfurase/cysteine desulfurase or related enzyme                                                         |
| arCOG00071 | COG00367 | AsnB | E | Asparagine synthase (glutamine-hydrolyzing) PAPS reductase related enzyme fused to RNA-binding PUA domain and ferredoxin domain |
| arCOG00073 | COG00175 | CysH | E | ABC-type spermidine/putrescine transport system, ATPase component                                                               |
| arCOG00177 | COG03842 | PotA | E | ABC-type dipeptide/oligopeptide/nickel transport system, ATPase component                                                       |
| arCOG00182 | COG00444 | DppD | E | Pyrroline-5-carboxylate reductase                                                                                               |
| arCOG00455 | COG00345 | ProC | E | ABC-type dipeptide/oligopeptide/nickel transport system, permease component                                                     |
| arCOG00748 | COG01173 | DppC | E | CubicO group peptidase, beta-lactamase class C family                                                                           |
| arCOG00771 | COG01680 |      | E | Acetolactate synthase, small subunit                                                                                            |
| arCOG00811 | COG00440 | IlvH | E | Carbamate kinase                                                                                                                |
| arCOG00863 | COG00549 | ArcC | E | 4-aminobutyrate aminotransferase or related aminotransferase                                                                    |
| arCOG00915 | COG00160 | GabT | E | ABC-type polar amino acid transport system, ATPase component                                                                    |
| arCOG00923 | COG01126 | GlnQ | E | ABC-type branched-chain amino acid transport system, periplasmic component                                                      |
| arCOG01021 | COG00683 | LivK | E | Phosphoserine phosphatase                                                                                                       |
| arCOG01158 | COG00560 | SerB | E | NADPH-dependent glutamate synthase beta chain or related oxidoreductase                                                         |
| arCOG01292 | COG00493 | GltD | E | N-methylhydantoinase A/acetone carboxylase, beta subunit                                                                        |
| arCOG01511 | COG00145 | HyuA | E | N-methylhydantoinase B/acetone carboxylase, alpha subunit                                                                       |
| arCOG01512 | COG00146 | HyuB | E | ABC-type transport system, periplasmic component                                                                                |
| arCOG01534 | COG00747 | DdpA | E | ABC-type amino acid transport system, permease component                                                                        |
| arCOG01798 | COG00765 | HisM | E | ABC-type amino acid transport/signal transduction system, periplasmic component/domain                                          |
| arCOG01799 | COG00834 | HisJ | E | Leucyl aminopeptidase (aminopeptidase T)                                                                                        |
| arCOG01890 | COG02309 | AmpS | E | Transglutaminase-like enzyme, putative cysteine protease                                                                        |
| arCOG02165 | COG01305 | -    | E | Transglutaminase-like enzyme, putative cysteine protease                                                                        |
| arCOG02167 | COG01305 | -    | E | Transglutaminase-like enzyme, putative cysteine protease                                                                        |
| arCOG02169 | COG01305 | -    | E | Transglutaminase-like enzyme, putative cysteine protease                                                                        |
| arCOG02255 | COG00253 | DapF | E | Diaminopimelate epimerase                                                                                                       |
| arCOG02268 | COG00019 | LysA | E | Diaminopimelate decarboxylase                                                                                                   |
| arCOG02305 | COG00347 | GlnK | E | Nitrogen regulatory protein PII                                                                                                 |
| arCOG02462 | COG01878 | -    | E | Kynurenine formamidase                                                                                                          |
| arCOG02486 | COG01305 | -    | E | Transglutaminase-like enzyme, putative cysteine protease                                                                        |
| arCOG03109 | COG01834 | -    | E | N-Dimethylarginine dimethylaminohydrolase                                                                                       |
| arCOG03377 |          |      | E | Serine protease                                                                                                                 |
| arCOG03602 | COG04690 | PepD | E | Dipeptidase                                                                                                                     |
| arCOG04333 | COG00436 | -    | E | Aspartate/tyrosine/aromatic aminotransferase                                                                                    |
| arCOG04353 | COG01465 | -    | E | 3-dehydroquinate synthase                                                                                                       |
| arCOG00087 | COG00518 | GuaA | F | GMP synthase - Glutamine amidotransferase domain                                                                                |
| arCOG00695 | COG00402 | SsnA | F | Cytosine deaminase or related metal-dependent hydrolase                                                                         |
| arCOG00858 | COG00528 | PyrH | F | Uridylate kinase                                                                                                                |
| arCOG01723 | COG01437 | CyaB | F | Adenylate cyclase, class 2 (thermophilic)                                                                                       |
| arCOG02464 | COG00041 | PurE | F | Phosphoribosylcarboxyaminoimidazole (NCAIR) mutase                                                                              |
| arCOG04309 | COG01912 | -    | F | S-adenosyl-L-methionine hydroxide adenosyltransferase                                                                           |
| arCOG04346 | COG01759 | -    | F | 5-formaminoimidazole-4-carboxamide-1-beta-D-ribofuranosyl 5'-monophosphate synthetase (purine biosynthesis)                     |
| arCOG00029 | COG00461 | PyrE | F | Orotate phosphoribosyltransferase                                                                                               |

|            |          |      |   |                                                                                           |
|------------|----------|------|---|-------------------------------------------------------------------------------------------|
| arCOG00031 | COG00503 | Apt  | F | Adenine/guanine phosphoribosyltransferase or related PRPP-binding protein                 |
| arCOG00063 | COG00504 | PyrG | F | CTP synthase (UTP-ammonia lyase)                                                          |
| arCOG00067 | COG00462 | PrsA | F | Phosphoribosylpyrophosphate synthetase                                                    |
| arCOG00081 | COG00284 | PyrF | F | Orotidine-5'-phosphate decarboxylase                                                      |
| arCOG00085 | COG00519 | GuaA | F | GMP synthase, PP-ATPase domain/subunit                                                    |
| arCOG00093 | COG00034 | PurF | F | Glutamine phosphoribosylpyrophosphate amidotransferase                                    |
| arCOG00102 | COG00047 | PurL | F | Phosphoribosylformylglycinamide (FGAM) synthase, glutamine amidotransferase domain        |
| arCOG00603 | COG00167 | PyrD | F | Dihydroorotate dehydrogenase                                                              |
| arCOG00639 | COG00150 | PurM | F | Phosphoribosylaminoimidazole (AIR) synthetase                                             |
| arCOG00641 | COG00046 | PurL | F | Phosphoribosylformylglycinamide (FGAM) synthase, synthetase domain                        |
| arCOG00689 | COG00044 | PyrC | F | Dihydroorotate or related cyclic amidohydrolase                                           |
| arCOG00692 | COG00402 | SsnA | F | Cytosine deaminase or related metal-dependent hydrolase                                   |
| arCOG00911 | COG00540 | PyrB | F | Aspartate carbamoyltransferase, catalytic chain                                           |
| arCOG01034 | COG01618 | -    | F | Predicted nucleotide kinase                                                               |
| arCOG01037 | COG01102 | Cmk  | F | Cytidylate kinase                                                                         |
| arCOG01075 | COG01051 | -    | F | NUDIX family hydrolase                                                                    |
| arCOG01221 | COG01986 | -    | F | Inosine/xanthosine triphosphatase                                                         |
| arCOG01324 | COG02820 | Udp  | F | Uridine phosphorylase                                                                     |
| arCOG01327 | COG00005 | Pnp  | F | Purine nucleoside phosphorylase                                                           |
| arCOG01747 | COG00015 | PurB | F | Adenylosuccinate lyase                                                                    |
| arCOG04184 | COG00127 | -    | F | Xanthosine triphosphate pyrophosphatase                                                   |
| arCOG04202 | COG02429 | -    | F | Archaeal GTP cyclohydrolase III                                                           |
| arCOG04229 | COG01781 | Pyrl | F | Aspartate carbamoyltransferase, regulatory subunit                                        |
| arCOG04387 | COG00104 | PurA | F | Adenylosuccinate synthase                                                                 |
| arCOG04415 | COG00151 | PurD | F | Phosphoribosylamine-glycine ligase                                                        |
| arCOG04421 | COG00152 | PurC | F | Phosphoribosylaminoimidazolesuccinocarboxamide (SAICAR) synthase                          |
| arCOG04462 | COG01828 | PurS | F | Phosphoribosylformylglycinamide (FGAM) synthase, PurS component                           |
| arCOG00612 | COG00516 | GuaB | F | IMP dehydrogenase/GMP reductase                                                           |
| arCOG00693 | COG01001 | AdeC | F | Adenine deaminase                                                                         |
| arCOG01046 | COG00563 | Adk  | F | Adenylate kinase or related kinase                                                        |
| arCOG02013 | COG00213 | DeoA | F | Thymidine phosphorylase                                                                   |
| arCOG03447 | COG01457 | CodB | F | Purine-cytosine permease or related protein                                               |
| arCOG04128 | COG00035 | Upp  | F | Uracil phosphoribosyltransferase                                                          |
| arCOG04320 | COG00274 | DeoC | F | Deoxyribose-phosphate aldolase                                                            |
| arCOG05252 | COG04741 | -    | F | Predicted secreted endonuclease distantly related to archaeal Holliday junction resolvase |
| arCOG00271 | COG00697 | RhaT | G | Permease of the drug/metabolite transporter (DMT) superfamily                             |
| arCOG02682 | COG00477 | ProP | G | Permease of the major facilitator superfamily                                             |
| arCOG00143 | COG00477 | ProP | G | Permease of the major facilitator superfamily                                             |
| arCOG03285 | COG03387 | SGA1 | G | Glycosyl hydrolase family 15                                                              |
| arCOG00016 | COG00524 | RbsK | G | Sugar kinase, ribokinase family                                                           |
| arCOG00018 | COG00063 | -    | G | Predicted sugar kinase                                                                    |
| arCOG00053 | COG00269 | SgbH | G | 3-hexulose-6-phosphate synthase or related protein                                        |
| arCOG00130 | COG00477 | ProP | G | Permease of the major facilitator superfamily                                             |
| arCOG00131 | COG00477 | ProP | G | Permease of the major facilitator superfamily                                             |
| arCOG00493 | COG00057 | GapA | G | Glyceraldehyde-3-phosphate dehydrogenase/erythrose-4-phosphate dehydrogenase              |
| arCOG00496 | COG00126 | Pgk  | G | 3-phosphoglycerate kinase                                                                 |
| arCOG00574 | COG01635 |      | G | Ribulose 1,5-bisphosphate synthetase, converts PRPP to RuBP, flavoprotein                 |

|            |          |      |   |                                                                                                                           |
|------------|----------|------|---|---------------------------------------------------------------------------------------------------------------------------|
| arCOG01051 | COG03958 | -    | G | Transketolase, C-terminal subunit                                                                                         |
| arCOG01053 | COG03959 | -    | G | Transketolase, N-terminal subunit                                                                                         |
| arCOG01122 | COG00120 | RpiA | G | Ribose 5-phosphate isomerase<br>Archaeal fructose-1,6-bisphosphatase or related enzyme of inositol monophosphatase family |
| arCOG01349 | COG00483 | SuhB | G | Putative glycerate kinase                                                                                                 |
| arCOG04170 | COG02379 | GckA | G | Phosphatase of the HAD superfamily                                                                                        |
| arCOG04221 | COG00647 | NagD | G | Phosphoenolpyruvate carboxylase                                                                                           |
| arCOG04435 | COG01892 | -    | G | Permease of the major facilitator superfamily                                                                             |
| arCOG00135 | COG00477 | ProP | G | ABC-type sugar transport system, periplasmic component                                                                    |
| arCOG00149 | COG01653 | UgpB | G | ABC-type sugar transport system, periplasmic component                                                                    |
| arCOG00151 | COG01653 | UgpB | G | ABC-type trehalose transport system, periplasmic component                                                                |
| arCOG00153 | COG01653 | UgpB | G | ABC-type sugar transport system, ATPase component                                                                         |
| arCOG00175 | COG03839 | MalK | G | ABC-type sugar transport system, ATPase component                                                                         |
| arCOG00180 | COG03839 | MalK | G | permease of the drug/metabolite transporter (DMT) superfamily                                                             |
| arCOG00272 | COG00697 | RhaT | G | Phosphoenolpyruvate synthase/pyruvate phosphate dikinase                                                                  |
| arCOG01114 | COG00574 | PpsA | G | Glycosyl transferase, related to UDP-glucuronosyltransferase                                                              |
| arCOG01393 | COG01819 | -    | G | Cellulase M or related protein                                                                                            |
| arCOG01518 | COG01363 | FrvX | G | L-fucose isomerase or related protein                                                                                     |
| arCOG01772 | COG02407 | Fucl | G | Thermophilic glucose-6-phosphate isomerase or related metalloenzyme                                                       |
| arCOG02602 | COG02140 | -    | G | Trehalose-6-phosphate synthase                                                                                            |
| arCOG02831 | COG00380 | OtsA | G | Predicted xylanase/chitin deacetylase                                                                                     |
| arCOG02876 | COG00726 | CDA1 | G | Predicted xylanase/chitin deacetylase                                                                                     |
| arCOG02878 | COG00726 | CDA1 | G | Protein containing cupin domain                                                                                           |
| arCOG03003 | COG00662 | -    | G | Alpha-mannosidase                                                                                                         |
| arCOG03661 | COG00383 | AMS1 | G | Predicted glycosylase                                                                                                     |
| arCOG04084 | COG02152 | -    | G | Mannosyl-3-phosphoglycerate synthase                                                                                      |
| arCOG04158 | -        | -    | G | Fuculose-1-phosphate aldolase                                                                                             |
| arCOG04226 | COG00235 | -    | G | Ribulose 1,5-bisphosphate carboxylase, large subunit                                                                      |
| arCOG04443 | COG01850 | RbcL | G | 2,4-dihydroxyhept-2-ene-1,7-dioic acid aldolase                                                                           |
| arCOG04974 | COG03836 | HpcH | G | Beta-galactosidase                                                                                                        |
| arCOG05856 | COG01874 | LacA | G | Alpha-galactosidase/6-phospho-beta-glucosidase, family 4 of glycosyl hydrolase                                            |
| arCOG06070 | COG01486 | CelF | G | Chitinase                                                                                                                 |
| arCOG07581 | COG03325 | ChiA | G | Lipoate-protein ligase A                                                                                                  |
| arCOG01939 | COG00095 | LplA | H | Predicted transcriptional regulator fused phosphomethylpyrimidine kinase, involved in the thiamin biosynthesis            |
| arCOG00021 | COG01992 | -    | H | Molybdopterin biosynthesis enzyme                                                                                         |
| arCOG00216 | COG00303 | MoeA | H | cob(I)alamin adenosyltransferase                                                                                          |
| arCOG00489 | COG02096 | -    | H | Molybdopterin converting factor, small subunit                                                                            |
| arCOG00536 | COG01977 | MoaD | H | Isopentenyl diphosphate isomerase                                                                                         |
| arCOG00613 | COG01304 | idi  | H | 3-polyprenyl-4-hydroxybenzoate decarboxylase or related decarboxylase                                                     |
| arCOG01671 | COG00043 | UbiD | H | Biotin-(acetyl-CoA carboxylase) ligase                                                                                    |
| arCOG01940 | COG00340 | BirA | H | Hydroxymethylpyrimidine/phosphomethylpyrimidine kinase                                                                    |
| arCOG00020 | COG00351 | ThiD | H | Predicted glutamine amidotransferase involved in pyridoxine biosynthesis                                                  |
| arCOG00034 | COG00311 | PDX2 | H | NH <sub>3</sub> -dependent NAD <sup>+</sup> synthetase                                                                    |
| arCOG00069 | COG00171 | NadE | H | Cobyrinic acid synthase                                                                                                   |
| arCOG00105 | COG01492 | CobQ | H | Cobyrinic acid a,c-diamide synthase                                                                                       |
| arCOG00106 | COG01797 | CobB | H | Molybdopterin biosynthesis enzyme                                                                                         |
| arCOG00214 | COG00521 | MoaB | H | 5-formyltetrahydrofolate cyclo-ligase                                                                                     |
| arCOG00474 | COG00212 | -    | H | 4-hydroxybenzoate polyprenyltransferase or related prenyltransferase                                                      |
| arCOG00476 | COG00382 | UbiA | H | Molybdopterin-guanine dinucleotide biosynthesis protein                                                                   |
| arCOG00532 | COG01763 | MobB | H |                                                                                                                           |

|            |          |      |   |                                                                                                             |
|------------|----------|------|---|-------------------------------------------------------------------------------------------------------------|
| arCOG00534 | COG00314 | MoaE | H | Molybdopterin converting factor, large subunit                                                              |
| arCOG00584 | COG00413 | PanB | H | Ketopantoate hydroxymethyltransferase                                                                       |
| arCOG00638 | COG00611 | ThiL | H | Thiamine monophosphate kinase                                                                               |
| arCOG00644 | COG00007 | CysG | H | Uroporphyrinogen-III methylase                                                                              |
| arCOG00650 | COG02241 | CobL | H | Precorrin-6B methylase 1<br>Glutamate-1-semialdehyde aminotransferase                                       |
| arCOG00918 | COG00001 | HemL | H |                                                                                                             |
| arCOG00930 | COG02896 | MoaA | H | Molybdenum cofactor biosynthesis enzyme                                                                     |
| arCOG01036 | COG00373 | HemA | H | Glutamyl-tRNA reductase<br>Siroheme synthase (precorrin-2 oxidase/ferrochelatase domain)                    |
| arCOG01044 | COG01648 | CysG | H |                                                                                                             |
| arCOG01045 | COG00237 | CoaE | H | Dephospho-CoA kinase<br>3,4-dihydroxy-2-butanone 4-phosphate synthase                                       |
| arCOG01320 | COG00108 | RibB | H |                                                                                                             |
| arCOG01322 | COG01731 | -    | H | Archaeal riboflavin synthase                                                                                |
| arCOG01323 | COG00054 | RibH | H | Riboflavin synthase beta-chain                                                                              |
| arCOG01348 | COG00061 | nadF | H | NAD kinase                                                                                                  |
| arCOG01481 | COG01488 | PncB | H | Nicotinic acid phosphoribosyltransferase                                                                    |
| arCOG01482 | COG00157 | NadC | H | Nicotinate-nucleotide pyrophosphorylase                                                                     |
| arCOG01484 | COG01985 | RibD | H | Pyrimidine reductase, riboflavin biosynthesis                                                               |
| arCOG01530 | COG00315 | MoaC | H | Molybdenum cofactor biosynthesis enzyme<br>3-polyprenyl-4-hydroxybenzoate decarboxylase                     |
| arCOG01703 | COG00163 | UbiX | H | Phosphopantothenoylcysteine synthetase/decarboxylase                                                        |
| arCOG01704 | COG00452 | Dfp  | H |                                                                                                             |
| arCOG01726 | COG00142 | IspA | H | Geranylgeranyl pyrophosphate synthase<br>Phosphoglycerate dehydrogenase or related dehydrogenase            |
| arCOG01754 | COG00111 | SerA | H | GTP:adenosylcobinamide-phosphate guanylyltransferase                                                        |
| arCOG01871 | COG02266 | -    | H | Molybdopterin-guanine dinucleotide biosynthesis protein A                                                   |
| arCOG01872 | COG00746 | MobA | H |                                                                                                             |
| arCOG01904 | COG01339 | -    | H | CTP-dependent Riboflavin kinase                                                                             |
| arCOG02048 | COG01587 | HemD | H | Uroporphyrinogen-III synthase                                                                               |
| arCOG02172 | COG00720 | -    | H | 6-pyruvoyl-tetrahydropterin synthase<br>2-polyprenylphenol hydroxylase or related flavodoxin oxidoreductase |
| arCOG02199 | COG00543 | UbiB | H |                                                                                                             |
| arCOG02741 | COG00422 | ThiC | H | Thiamine biosynthesis protein ThiC                                                                          |
| arCOG03838 |          | PqqD | H | Coenzyme PQQ synthesis protein D                                                                            |
| arCOG04075 | COG00214 | SNZ1 | H | Pyridoxine biosynthesis enzyme                                                                              |
| arCOG04137 | COG00499 | SAM1 | H | S-adenosylhomocysteine hydrolase<br>Triphosphoribosyl-dephospho-CoA synthetase                              |
| arCOG04238 | COG01767 | CitG | H |                                                                                                             |
| arCOG04262 | COG01701 | -    | H | Phosphopantothenate synthetase                                                                              |
| arCOG04263 | COG01829 | -    | H | Pantoate kinase                                                                                             |
| arCOG04272 | COG02038 | CobT | H | NaMN:DMB phosphoribosyltransferase                                                                          |
| arCOG04274 | COG01270 | CbiB | H | Cobalamin biosynthesis protein CobD/CbiB                                                                    |
| arCOG04299 | COG00181 | HemC | H | Porphobilinogen deaminase                                                                                   |
| arCOG04300 | COG00113 | HemB | H | Delta-aminolevulinic acid dehydratase                                                                       |
| arCOG04338 | COG00368 | CobS | H | Cobalamin-5-phosphate synthase                                                                              |
| arCOG04459 | COG00379 | NadA | H | Quinolinate synthase<br>Fe <sup>2+</sup> dependent formamide hydrolase, cofactor Fo biosynthesis enzyme     |
| arCOG04536 | COG01402 | -    | H | 7-keto-8-aminopelargonate synthetase or related enzyme                                                      |
| arCOG00113 | COG00156 | BioF | H | ABC-type tungstate transport system, periplasmic component                                                  |
| arCOG00166 | COG04662 | TupA | H |                                                                                                             |
| arCOG00217 | COG00303 | MoeA | H | Molybdopterin biosynthesis enzyme                                                                           |
| arCOG00228 | COG03585 | Mopl | H | Molybdopterin-binding protein<br>ABC-type tungstate transport system, permease component                    |
| arCOG00229 | COG02998 | TupB | H |                                                                                                             |
| arCOG00656 | COG01060 | ThiH | H | Thiamine biosynthesis enzyme ThiH, FO synthase or related uncharacterized enzyme                            |
| arCOG00954 | COG02896 | MoaA | H | Molybdenum cofactor biosynthesis enzyme                                                                     |
| arCOG01089 | COG00352 | ThiE | H | Thiamine monophosphate synthase                                                                             |
| arCOG01483 | COG00157 | NadC | H | Nicotinate-nucleotide pyrophosphorylase                                                                     |
| arCOG01870 | COG01865 | cbiZ | H | Adenosylcobinamide amidohydrolase                                                                           |
| arCOG02620 | COG01541 | PaaK | H | Coenzyme F390 synthetase                                                                                    |



|            |          |       |   |                                                                                           |
|------------|----------|-------|---|-------------------------------------------------------------------------------------------|
| arCOG02714 | COG01478 | CofE  | H | F(420)-O:gamma-glutamyl ligase, F420 coenzyme biosynthesis enzyme                         |
| arCOG02817 | COG00285 | FolC  | H | Folylpolyglutamate synthase and Dihydropteroate synthase                                  |
| arCOG04139 | COG01893 | ApbA  | H | Ketopantoate reductase                                                                    |
| arCOG04301 | COG01469 | MptA  | H | Fe(2+)-dependent GTP cyclohydrolase                                                       |
| arCOG04336 | COG01962 | MtrH  | H | Tetrahydromethanopterin S-methyltransferase, subunit H                                    |
| arCOG04678 | COG02109 | BtuR  | H | ATP:corrinoide adenosyltransferase                                                        |
| arCOG06472 | COG01240 |       | H | Mg-chelatase subunit ChlD                                                                 |
| arCOG01529 | COG00365 | Acs   | I | Acyl-coenzyme A synthetase/AMP-(fatty) acid ligase                                        |
| arCOG01590 | COG00439 | AccC  | I | Biotin carboxylase                                                                        |
| arCOG02705 | COG04799 | -     | I | Acetyl-CoA carboxylase, carboxyltransferase component                                     |
| arCOG04213 | COG01260 | INO1  | I | Myo-inositol-1-phosphate synthase                                                         |
| arCOG00247 | COG02084 | MmsB  | I | 3-hydroxyisobutyrate dehydrogenase or related beta-hydroxyacid dehydrogenase              |
| arCOG00670 | COG00558 | PgsA  | I | Phosphatidylglycerophosphate synthase                                                     |
| arCOG01028 | COG01577 | ERG12 | I | Mevalonate kinase                                                                         |
| arCOG01278 | COG00183 | PaaJ  | I | Acetyl-CoA acetyltransferase                                                              |
| arCOG01532 | COG00020 | UppS  | I | Undecaprenyl pyrophosphate synthase                                                       |
| arCOG01710 | COG02185 | Sbm   | I | Methylmalonyl-CoA mutase, C-terminal domain/subunit (cobalamin-binding)                   |
| arCOG01767 | COG03425 | PksG  | I | 3-hydroxy-3-methylglutaryl CoA synthase                                                   |
| arCOG01879 | COG00170 |       | I | Dolichol kinase family protein                                                            |
| arCOG04106 | COG00575 | CdsA  | I | CDP-diglyceride synthetase                                                                |
| arCOG04232 | COG01884 | Sbm   | I | Methylmalonyl-CoA mutase                                                                  |
| arCOG04260 | COG01257 | HMG1  | I | Hydroxymethylglutaryl-CoA reductase                                                       |
| arCOG00674 | COG00558 | PgsA  | I | Phosphatidylglycerophosphate synthase                                                     |
| arCOG00856 | COG00318 | CaiC  | I | Acyl-CoA synthetase (AMP-forming)/AMP-acid ligase II                                      |
| arCOG00860 | COG01608 | -     | I | Isopentenyl phosphate kinase, enzyme of modified mevalonate pathway                       |
| arCOG01650 | COG02267 | PldB  | I | Lysophospholipase, alpha-beta hydrolase superfamily                                       |
| arCOG01842 | COG03255 | -     | I | Putative sterol carrier protein                                                           |
| arCOG01869 | COG01267 | PgpA  | I | Phosphatidylglycerophosphatase A fused to adenosylcobinamide amidohydrolase, CbiZ         |
| arCOG01986 | COG04670 | -     | I | Acyl CoA:acetate/3-ketoacid CoA transferase                                               |
| arCOG02039 | COG01502 | Cls   | I | Phosphatidylserine/phosphatidylglycerophosphate/cardiolipin synthase or related enzyme    |
| arCOG02041 | COG01502 | Cls   | I | Phosphatidylserine/phosphatidylglycerophosphate/cardiolipin synthase or related enzyme    |
| arCOG02678 | COG01924 | -     | I | Activator of 2-hydroxyglutaryl-CoA dehydratase (HSP70-class ATPase domain)                |
| arCOG04438 | COG01689 | -     | I | Class II terpene cyclase family protein                                                   |
| arCOG07147 | COG01657 | SqhC  | I | Squalene cyclase                                                                          |
| arCOG00975 | COG00144 | Sun   | J | tRNA or rRNA cytosine-C5-methylase                                                        |
| arCOG01115 | COG01571 | TiaS  | J | tRNA(Ile2) 2-azmatinylcytidine synthetase; containing Zn-ribbon domain and OB-fold domain |
| arCOG01630 | COG00251 | TdcF  | J | Putative translation initiation inhibitor, yjgF family                                    |
| arCOG01952 | COG00009 | SUA5  | J | Putative translation factor (SUA5)                                                        |
| arCOG04307 | COG01530 | CafA  | J | Ribonuclease G and E                                                                      |
| arCOG00110 | COG02813 | RsmC  | J | 16S RNA G1207 methylase RsmC                                                              |
| arCOG00541 | COG01236 | YSH1  | J | Predicted exonuclease of the beta-lactamase fold involved in RNA processing               |
| arCOG00545 | COG01236 | YSH1  | J | Predicted exonuclease of the beta-lactamase fold involved in RNA processing               |
| arCOG00676 | COG01096 | -     | J | Predicted RNA-binding protein (consists of S1 domain and a Zn-ribbon domain)              |
| arCOG00986 | COG00144 | Sun   | J | RNA methylase associated PUA domain                                                       |
| arCOG01015 | COG01258 | -     | J | Predicted pseudouridylylase synthase                                                      |
| arCOG01123 | COG00182 | -     | J | Translation initiation factor eIF-2B alpha subunit                                        |
| arCOG01354 | COG02892 | -     | J | Subunit of KEOPS complex (Cgi121BUD32KAE1)                                                |

|            |          |        |   |                                                                                                             |
|------------|----------|--------|---|-------------------------------------------------------------------------------------------------------------|
| arCOG01564 | COG03276 | SelB   | J | Selenocysteine-specific translation elongation factor or SelB-II domain                                     |
| arCOG01616 | COG01650 | GEK1   | J | D-aminoacyl-tRNA deacylase, involved in ethanol tolerance                                                   |
| arCOG02466 | COG03277 | GAR1   | J | RNA-binding protein involved in rRNA processing                                                             |
| arCOG03247 | COG02136 | IMP4   | J | Predicted exosome subunit/U3 small nucleolar ribonucleoprotein (snoRNP) component, contains IMP4 domain     |
| arCOG04122 | COG01756 | Mra1   | J | EMG1/NEP1 rRNA methyltransferase                                                                            |
| arCOG04125 | COG00430 | RCL1   | J | RNA 3'-terminal phosphate cyclase                                                                           |
| arCOG04131 | COG00030 | KsgA   | J | Dimethyladenosine transferase (rRNA methylation)                                                            |
| arCOG00547 | COG00595 | -      | J | mRNA degradation ribonuclease J1/J2 (metallo-beta-lactamase superfamily)                                    |
| arCOG00953 | COG00731 | TYW3   | J | Homolog of Wybutosine (yW) biosynthesis enzyme, Fe-S oxidoreductase                                         |
| arCOG01124 | COG01184 | GCD2   | J | Translation initiation factor 2B subunit, eIF-2B alpha/beta/delta family                                    |
| arCOG01125 | COG01184 | GCD2   | J | Translation initiation factor 2B subunit, eIF-2B alpha/beta/delta family                                    |
| arCOG02197 | COG01617 | Cgi121 | J | Subunit of KEOPS complex, involved (Cgi121BUD32KAE1)                                                        |
| arCOG03218 | COG04021 | Thg1   | J | tRNAHis guanylyltransferase                                                                                 |
| arCOG04063 | COG01859 | KptA   | J | RNA:NAD 2'-phosphotransferase                                                                               |
| arCOG04414 | COG02892 | Pcc1   | J | Subunit of KEOPS complex (Cgi121BUD32KAE1)                                                                  |
| arCOG00815 | COG02002 | AbrB   | K | Transcriptional regulator AbrB                                                                              |
| arCOG00492 | COG01167 | ARO8   | K | Transcriptional regulators containing a DNA-binding HTH domain and an aminotransferase domain (MocR family) |
| arCOG00770 | COG01199 | DinG   | K | Rad3-related DNA helicase                                                                                   |
| arCOG01055 | COG03432 | -      | K | Predicted transcriptional regulator                                                                         |
| arCOG02103 |          |        | K | Transcriptional regulator, contains wHTH domain                                                             |
| arCOG03182 | COG01846 | MarR   | K | Transcriptional regulator, MarR family                                                                      |
| arCOG00002 | COG01695 | -      | K | Predicted transcriptional regulator, PadR family                                                            |
| arCOG00610 | COG02524 | -      | K | Predicted transcriptional regulator, contains C-terminal CBS domains                                        |
| arCOG00724 | COG01695 |        | K | Predicted transcriptional regulator, PadR family                                                            |
| arCOG00812 | COG02002 | AbrB   | K | Transcriptional regulator AbrB                                                                              |
| arCOG00874 | COG01061 | xpb    | K | ssDNA-dependent ATPase, helicase superfamily II                                                             |
| arCOG01446 | COG00640 | ArsR   | K | Transcriptional regulator containing HTH domain, ArsR family                                                |
| arCOG01679 | COG00640 | ArsR   | K | Transcriptional regulator containing HTH domain, ArsR family                                                |
| arCOG01761 | COG00195 | NusA   | K | Transcription elongation factor                                                                             |
| arCOG02099 | COG01321 | TroR   | K | Mn-dependent transcriptional regulator (DtxR family)                                                        |
| arCOG02100 | COG01321 | TroR   | K | Mn-dependent transcriptional regulator (DtxR family)                                                        |
| arCOG02271 | COG03413 | -      | K | Predicted transcriptional regulator, C-terminal HTH-like domain                                             |
| arCOG04060 | COG01709 | -      | K | Predicted transcriptional regulator                                                                         |
| arCOG04061 | COG01308 | EGD2   | K | Transcription factor homologous to NACalpha-BTF3                                                            |
| arCOG04081 | COG01224 | TIP49  | K | DNA helicase TIP49, TBP-interacting protein                                                                 |
| arCOG04152 | COG01395 | -      | K | Predicted transcriptional regulator                                                                         |
| arCOG00001 | COG01695 | -      | K | Predicted transcriptional regulator, PadR family                                                            |
| arCOG00374 | COG02512 | -      | K | Predicted membrane-associated transcriptional regulator                                                     |
| arCOG00394 | COG00640 | ArsR   | K | Transcriptional regulator containing HTH domain, ArsR family                                                |
| arCOG00608 | COG03620 | -      | K | Predicted transcriptional regulator with C-terminal CBS domains                                             |
| arCOG00732 | COG01846 | MarR   | K | Transcriptional regulator, MarR family                                                                      |
| arCOG00818 | COG02002 | AbrB   | K | Transcriptional regulator AbrB                                                                              |
| arCOG00826 | COG00454 | WecD   | K | Acetyltransferase (GNAT) family                                                                             |
| arCOG00844 | COG00454 | WecD   | K | Acetyltransferase (GNAT) family                                                                             |

|            |          |      |   |                                                                       |
|------------|----------|------|---|-----------------------------------------------------------------------|
| arCOG00871 | COG00553 | HepA | K | Superfamily II DNA/RNA helicase, SNF2 family                          |
| arCOG01057 | COG01733 | -    | K | Predicted transcriptional regulator                                   |
| arCOG01361 | COG01243 | ELP3 | K | Histone acetyltransferase                                             |
| arCOG01665 | COG02026 | RelE | K | Cytotoxic translational repressor of toxin-antitoxin stability system |
| arCOG01680 | COG00640 | ArsR | K | Transcriptional regulator containing HTH domain, ArsR family          |
| arCOG01681 | COG00640 | ArsR | K | Transcriptional regulator containing HTH domain, ArsR family          |
| arCOG01683 | COG00640 | ArsR | K | Transcriptional regulator containing HTH domain, ArsR family          |
| arCOG01684 | COG01777 | -    | K | Predicted transcriptional regulator                                   |
| arCOG01686 | COG00640 | ArsR | K | Transcriptional regulator containing HTH domain, ArsR family          |
| arCOG01687 | COG00640 | ArsR | K | Transcriptional regulator containing HTH domain, ArsR family          |
| arCOG01804 | COG03888 | -    | K | Predicted transcriptional regulator                                   |
| arCOG02038 | COG01378 | -    | K | Sugar-specific transcriptional regulator TrmB                         |
| arCOG02611 | COG03398 | -    | K | Predicted transcriptional regulator, contained two HTH domains        |
| arCOG02613 | COG01386 | -    | K | Chromosome segregation and condensation protein B                     |
| arCOG02795 | COG01510 | -    | K | Predicted transcriptional regulator                                   |
| arCOG03880 | COG02880 | -    | K | DNA-binding protein, potential antitoxin AbrB/MazE fold               |
| arCOG03936 | COG02002 | AbrB | K | Transcriptional regulator AbrB                                        |
| arCOG04248 | COG00846 | SIR2 | K | NAD-dependent protein deacetylase, SIR2 family                        |
| arCOG04280 | COG01940 | NagC | K | Transcriptional regulator/sugar kinase                                |
| arCOG04362 | COG04742 | -    | K | Predicted transcriptional regulator                                   |
| arCOG04518 |          |      | K | Predicted transcriptional regulator, contains HTH domain              |
| arCOG04554 | COG01356 | txf  | K | Transcriptional regulator                                             |
| arCOG04818 | COG00553 | HepA | K | Superfamily II DNA/RNA helicase, SNF2 family                          |
| arCOG07152 | COG02880 | -    | K | DNA-binding protein, potential antitoxin AbrB/MazE fold               |
| arCOG07495 | COG01497 | -    | K | Predicted transcriptional regulator                                   |
| arCOG07561 | COG02512 | -    | K | Predicted regulatory protein containing HTH domain                    |
| arCOG10049 | COG02880 |      | K | DNA-binding protein, potential antitoxin AbrB/MazE fold               |
| arCOG04157 | COG00270 | Dcm  | L | Site-specific DNA methylase                                           |
| arCOG00679 | COG00675 | -    | L | Transposase                                                           |
| arCOG03164 | COG02452 | -    | L | Predicted site-specific integrase-resolvase                           |
| arCOG04298 | COG01839 | -    | L | Predicted adenosine-specific kinase                                   |
| arCOG00553 | COG01204 | -    | L | Replicative SFII helicase                                             |
| arCOG00792 | COG01112 | -    | L | Superfamily I DNA/RNA helicase                                        |
| arCOG04110 | COG01467 | PR1  | L | Eukaryotic-type DNA primase, catalytic (small) subunit                |
| arCOG04357 | COG01059 | -    | L | Thermostable 8-oxoguanine DNA glycosylase                             |
| arCOG00115 | COG00863 | -    | L | DNA modification methylase                                            |
| arCOG00426 | COG00608 | RecJ | L | DHH superfamily phosphohydrolase/exonuclease                          |
| arCOG00464 | COG00122 | AlkA | L | 3-methyladenine DNA glycosylase/8-oxoguanine DNA glycosylase          |
| arCOG00558 | COG00513 | SrmB | L | Superfamily II DNA and RNA helicase                                   |
| arCOG00806 | COG01112 | -    | L | Superfamily I DNA/RNA helicase fused to RecB family endonuclease      |
| arCOG00890 | COG00863 | -    | L | DNA modification methylase                                            |
| arCOG01244 | COG04342 | -    | L | Integrase/Recombinase                                                 |
| arCOG01290 | COG01533 | SplB | L | DNA repair photolyase                                                 |
| arCOG01304 | COG01637 | NucS | L | RecB family endonuclease acting on branched DNA substrates            |
| arCOG01442 | COG02254 | -    | L | HD superfamily nuclease                                               |
| arCOG02129 | COG03335 | -    | L | Transposase                                                           |
| arCOG02610 | COG01354 | -    | L | Rec8/ScpA/Sccl-like protein (kleisin family)                          |
| arCOG02636 | COG00827 | -    | L | Adenine-specific DNA methylase                                        |
| arCOG02759 | COG01943 | -    | L | Transposase                                                           |
| arCOG03145 | COG01372 | -    | L | Intein/homing endonuclease                                            |

|            |          |        |   |                                                                                                                                                           |
|------------|----------|--------|---|-----------------------------------------------------------------------------------------------------------------------------------------------------------|
| arCOG03146 | COG01372 |        | L | Intein/homing endonuclease                                                                                                                                |
| arCOG03147 | COG01372 |        | L | Intein/homing endonuclease                                                                                                                                |
| arCOG03151 | COG01372 | -      | L | Intein/homing endonuclease                                                                                                                                |
| arCOG03154 | COG01372 | -      | L | Intein/homing endonuclease                                                                                                                                |
| arCOG03155 | COG01241 | MCM2   | L | Cdc46/Mcm family protein (inactivated)<br>DNA endonuclease related to intein-<br>encoded endonuclease                                                     |
| arCOG03156 | COG03780 | -      | L | Site-specific recombinase, DNA invertase Pin<br>homolog                                                                                                   |
| arCOG03162 | COG01961 | PinR   | L | Predicted ATP-dependent endonuclease of<br>the OLD family                                                                                                 |
| arCOG03235 | COG03593 | -      | L | ATP-dependent RNA ligase                                                                                                                                  |
| arCOG04218 | COG01423 | -      | L | Predicted endonuclease (RecB family)                                                                                                                      |
| arCOG04306 | COG04998 | -      | L |                                                                                                                                                           |
| arCOG04356 | COG03372 | Bax1   | L | Nuclease of restriction endonuclease-like<br>fold, implicated in nucleotide excision repair                                                               |
| arCOG07683 | COG01637 | -      | L | Predicted nuclease of the RecB family<br>DNA sulfur modification protein DndD,<br>ATPase                                                                  |
| arCOG00373 | COG01196 |        | L |                                                                                                                                                           |
| arCOG00666 | COG01208 | GCD1   | M | N-acetylglucosamine-1-phosphate<br>uridylyltransferase                                                                                                    |
| arCOG00057 | COG00449 | GlmS   | M | Glucosamine 6-phosphate synthetase                                                                                                                        |
| arCOG01369 | COG00451 | WcaG   | M | Nucleoside-diphosphate-sugar epimerase<br>Predicted sugar phosphate isomerase<br>involved in capsule formation                                            |
| arCOG00068 | COG00794 | GutQ   | M | dTDP-glucose pyrophosphorylase                                                                                                                            |
| arCOG00667 | COG01209 | RfbA   | M | Glycosyltransferase                                                                                                                                       |
| arCOG00895 | COG00463 | WcaA   | M | Cytidylyltransferase fused to conserved<br>domain of DUF357 family                                                                                        |
| arCOG01222 | COG00615 | TagD   | M | dTDP-D-glucose 4,6-dehydratase                                                                                                                            |
| arCOG01371 | COG01088 | RfbB   | M | Glycosyltransferase                                                                                                                                       |
| arCOG01385 | COG00463 | WcaA   | M | S-layer domain                                                                                                                                            |
| arCOG04400 | COG01361 | -      | M | Predicted pyridoxal phosphate-dependent<br>enzyme apparently involved in regulation of<br>cell wall biogenesis                                            |
| arCOG00118 | COG00399 | WecE   | M | UDP-N-acetyl-D-mannosaminuronate<br>dehydrogenase                                                                                                         |
| arCOG00252 | COG00677 | WecC   | M | Predicted UDP-glucose 6-dehydrogenase                                                                                                                     |
| arCOG00253 | COG01004 | Ugd    | M | 4-amino-4-deoxy-L-arabinose transferase or<br>related glycosyltransferase of PMT family                                                                   |
| arCOG00566 | COG01807 | ArnT   | M | Predicted membrane-associated Zn-<br>dependent protease                                                                                                   |
| arCOG00609 | COG00750 | -      | M | UDP-glucose pyrophosphorylase                                                                                                                             |
| arCOG00665 | COG01210 | GalU   | M | Predicted sugar nucleotidyltransferase                                                                                                                    |
| arCOG00673 | COG01213 | -      | M | Glycosyltransferase                                                                                                                                       |
| arCOG00896 | COG00463 | WcaA   | M | L-alanine-DL-glutamate epimerase or related<br>enzyme of enolase superfamily                                                                              |
| arCOG01168 | COG04948 | -      | M | Nucleoside-diphosphate-sugar epimerase                                                                                                                    |
| arCOG01376 | COG00451 | WcaG   | M | Glycosyltransferase                                                                                                                                       |
| arCOG01386 | COG01215 | -      | M | UDP-N-acetylglucosamine 2-epimerase                                                                                                                       |
| arCOG01392 | COG00381 | WecB   | M | Glycosyltransferase                                                                                                                                       |
| arCOG01405 | COG00438 | RfaG   | M | Glycosyltransferase                                                                                                                                       |
| arCOG01407 | COG00438 | RfaG   | M | Glycosyltransferase                                                                                                                                       |
| arCOG01408 | COG00438 | RfaG   | M | Glycosyltransferase                                                                                                                                       |
| arCOG01409 | COG00438 | RfaG   | M | Glycosyltransferase                                                                                                                                       |
| arCOG02427 | COG00836 | {ManC} | M | Mannose-1-phosphate guanylyltransferase<br>fused to cupin domain                                                                                          |
| arCOG04468 | COG00451 | WcaG   | M | Nucleoside-diphosphate-sugar epimerase<br>Putative glycosyl/glycerophosphate<br>transferase involved in teichoic acid<br>biosynthesis TagF/TagB/EpsJ/RodC |
| arCOG04827 | COG01887 | TagB   | M | Peptidase A24A, prepilin type IV                                                                                                                          |
| arCOG02298 | COG01989 | PulO   | N | Methylase of chemotaxis methyl-accepting<br>protein, contains Pas and CheB domains                                                                        |
| arCOG04921 | COG01352 | CheR   | N | Predicted redox protein, regulator of<br>disulfide bond formation                                                                                         |
| arCOG02062 | COG00425 | SirA   | O | Polyprenyltransferase (cytochrome oxidase<br>assembly factor)                                                                                             |
| arCOG00479 | COG00109 | CyoE   | O | Protein-L-isoaspartate<br>carboxylmethyltransferase                                                                                                       |
| arCOG00976 | COG02518 | Pcm    | O | Thiol-disulfide isomerase or thioredoxin                                                                                                                  |
| arCOG01972 | COG00526 | TrxA   | O | Highly conserved protein containing a<br>thioredoxin domain                                                                                               |
| arCOG02007 | COG01331 | -      | O |                                                                                                                                                           |

|            |          |        |   |                                                                                                                     |
|------------|----------|--------|---|---------------------------------------------------------------------------------------------------------------------|
| arCOG00065 | COG00520 | csdA   | O | Selenocysteine lyase/Cysteine desulfurase                                                                           |
| arCOG00164 | COG00555 | CysU   | O | ABC-type sulfate transport system, permease component                                                               |
| arCOG00310 | COG01225 | Bcp    | O | Peroxisredoxin                                                                                                      |
| arCOG00636 | COG00309 | HypE   | O | Hydrogenase maturation factor                                                                                       |
| arCOG01187 | COG00068 | HypF   | O | Hydrogenase maturation factor<br>Zn-dependent protease with chaperone function                                      |
| arCOG01331 | COG00501 | HtpX   | O |                                                                                                                     |
| arCOG01833 | COG00071 | IbpA   | O | Molecular chaperone (HSP20 family)                                                                                  |
| arCOG02173 | COG00602 | NrdG   | O | Organic radical activating enzyme<br>Predicted redox protein, regulator of disulfide bond formation                 |
| arCOG03686 | COG01765 | -      | O |                                                                                                                     |
| arCOG04427 | COG00298 | HypC   | O | Hydrogenase maturation factor                                                                                       |
| arCOG04428 | COG00409 | HypD   | O | Hydrogenase maturation factor                                                                                       |
| arCOG00702 | COG01404 | AprE   | O | Subtilisin-like serine protease                                                                                     |
| arCOG00936 | COG01180 | PfIA   | O | Pyruvate-formate lyase-activating enzyme                                                                            |
| arCOG00947 | COG01180 | PfIA   | O | Pyruvate-formate lyase-activating enzyme<br>Zn-dependent protease with chaperone function                           |
| arCOG01333 | COG00501 | HtpX   | O |                                                                                                                     |
| arCOG01334 | COG00501 | HtpX   | O | Zn-dependent protease with chaperone function                                                                       |
| arCOG01910 | COG01030 | NfeD   | O | Short-chain alcohol dehydrogenase                                                                                   |
| arCOG01911 | COG00616 | SppA   | O | Periplasmic serine protease (ClpP class)<br>Membrane protein implicated in regulation of membrane protease activity |
| arCOG01912 | COG01585 | -      | O |                                                                                                                     |
| arCOG02163 | COG04930 | -      | O | Predicted ATP-dependent Lon-type protease                                                                           |
| arCOG02833 | COG00265 | DegQ   | O | Serine protease Do (heat-shock protein)                                                                             |
| arCOG04933 | COG04826 | -      | O | Serine protease inhibitor                                                                                           |
| arCOG06880 | COG00484 | DnaJ   | O | DnaJ type Zn finger domain                                                                                          |
| arCOG00318 | COG00704 | PhoU   | P | Phosphate uptake regulator<br>ABC-type phosphate transport system, permease component                               |
| arCOG00167 | COG00573 | PstC   | P |                                                                                                                     |
| arCOG00168 | COG00581 | PstA   | P | ABC-type phosphate transport system, permease component                                                             |
| arCOG00193 | COG01116 | TauB   | P | ABC-type nitrate/sulfonate/bicarbonate transport system, ATPase component                                           |
| arCOG00213 | COG00226 | PstS   | P | ABC-type phosphate transport system, periplasmic component                                                          |
| arCOG01576 | COG02217 | ZntA   | P | Cation transport ATPase                                                                                             |
| arCOG01868 | COG00735 | Fur    | P | Fe <sup>2+</sup> /Zn <sup>2+</sup> uptake regulation protein, fur/PerR                                              |
| arCOG02640 | COG01392 | -      | P | Phosphate transport regulator (distant homolog of PhoU)                                                             |
| arCOG04233 | COG00614 | FepB   | P | ABC-type Fe <sup>3+</sup> -hydroxamate transport system, periplasmic component                                      |
| arCOG04531 | COG01914 | MntH   | P | Mn <sup>2+</sup> and Fe <sup>2+</sup> transporter of the NRAMF family                                               |
| arCOG00198 | COG01120 | FepC   | P | ABC-type cobalamin/Fe <sup>3+</sup> -siderophores transport system, ATPase component                                |
| arCOG00219 | COG00725 | ModA   | P | ABC-type molybdate transport system, periplasmic component                                                          |
| arCOG00231 | COG01117 | PstB   | P | ABC-type phosphate transport system, ATPase component                                                               |
| arCOG00238 | COG01055 | ArsB   | P | Na <sup>+</sup> /H <sup>+</sup> antiporter NhaD or related arsenite permease                                        |
| arCOG01007 | COG00609 | FepD   | P | ABC-type Fe <sup>3+</sup> -siderophore transport system, permease component                                         |
| arCOG01069 | COG00446 |        | P | CoA-dependent NAD(P)H Sulfur Oxidoreductase                                                                         |
| arCOG01953 | COG00475 | KefB   | P | Kef-type K <sup>+</sup> transport system, membrane component                                                        |
| arCOG02021 | COG00607 | PspE   | P | Rhodanese-related sulfurtransferase                                                                                 |
| arCOG02267 | COG00306 | PitA   | P | Phosphate/sulphate permease                                                                                         |
| arCOG02763 | COG02217 |        | P | Heavy-metal-associated domain (HMA)                                                                                 |
| arCOG02852 | COG02146 | {NirD} | P | Ferredoxin subunit of nitrite reductase or ring-hydroxylating dioxygenase                                           |
| arCOG04397 | COG00004 | AmtB   | P | Ammonia permease                                                                                                    |
| arCOG00163 | COG01178 | ThiP   | P | ABC-type Fe <sup>3+</sup> transport system, permease component                                                      |
| arCOG00169 | COG00600 | TauC   | P | ABC-type nitrate/sulfonate/bicarbonate transport system, permease component                                         |

|            |          |      |   |                                                                                       |
|------------|----------|------|---|---------------------------------------------------------------------------------------|
| arCOG00188 | COG01122 | CbiO | P | ABC-type cobalt transport system, ATPase component                                    |
| arCOG00201 | COG01121 | ZnuC | P | ABC-type Mn/Zn transport system, ATPase component                                     |
| arCOG00202 | COG01122 | CbiO | P | ABC-type cobalt transport system, ATPase component                                    |
| arCOG00230 | COG01910 | -    | P | Periplasmic molybdate-binding protein/domain                                          |
| arCOG00232 | COG00704 | PhoU | P | Phosphate uptake regulator                                                            |
| arCOG00237 | COG00471 | CitT | P | Di- and tricarboxylate transporter                                                    |
| arCOG00359 | COG00370 | FeoB | P | Fe <sup>2+</sup> transport system protein B                                           |
| arCOG00576 | COG00428 | -    | P | Predicted divalent heavy-metal cations transporter                                    |
| arCOG00624 | COG01824 | -    | P | Permease, similar to cation transporter                                               |
| arCOG00625 | COG02239 | MgtE | P | Mg/Co/Ni transporter MgtE (contains CBS domain)                                       |
| arCOG01005 | COG00803 | Lral | P | ABC-type metal ion transport system, periplasmic component/surface adhesin            |
| arCOG01006 | COG01108 | ZnuB | P | ABC-type Mn <sup>2+</sup> /Zn <sup>2+</sup> transport system, permease component      |
| arCOG01040 | COG00529 | CysC | P | Adenylylsulfate kinase or related kinase                                              |
| arCOG01094 | COG02193 | Bfr  | P | Bacterioferritin (cytochrome b1)                                                      |
| arCOG01095 | COG01528 | Ftn  | P | Ferritin                                                                              |
| arCOG01474 | COG00053 | MMT1 | P | Predicted Co/Zn/Cd cation transporter                                                 |
| arCOG01477 | COG01230 | CzcD | P | Co/Zn/Cd efflux system component                                                      |
| arCOG01585 | COG01522 | Lrp  | P | Transcriptional regulator (Lrp/AsnC family)                                           |
| arCOG01803 | COG00715 | TauA | P | ABC-type nitrate/sulfonate/bicarbonate transport system, periplasmic component        |
| arCOG01957 | COG00569 | TrkA | P | K <sup>+</sup> transport system, NAD-binding component                                |
| arCOG01958 | COG01226 | Kch  | P | Kef-type K <sup>+</sup> transport system, predicted NAD binding component             |
| arCOG02102 | COG01918 | FeoA | P | Fe <sup>2+</sup> transport system protein A                                           |
| arCOG02190 | COG00798 | ACR3 | P | Arsenite efflux pump ACR3 or related permease                                         |
| arCOG02248 | COG00310 | CbiM | P | ABC-type Co <sup>2+</sup> transport system, permease component                        |
| arCOG02250 | COG00619 | CbiQ | P | ABC-type cobalt transport system, permease component CbiQ or related transporter      |
| arCOG02569 | COG00038 | Eric | P | Chloride channel protein Eric                                                         |
| arCOG02764 | COG02608 | CopZ | P | Copper-ion-binding protein                                                            |
| arCOG02849 | COG00003 | ArsA | P | Oxyanion-translocating ATPase                                                         |
| arCOG03072 | COG01006 | MnhC | P | Multisubunit Na <sup>+</sup> /H <sup>+</sup> antiporter, MnhC subunit                 |
| arCOG03076 | COG01563 | -    | P | Predicted subunit of the Multisubunit Na <sup>+</sup> /H <sup>+</sup> antiporter      |
| arCOG03077 | COG02111 | MnhB | P | Multisubunit Na <sup>+</sup> /H <sup>+</sup> antiporter, MnhB subunit                 |
| arCOG03078 | COG01563 | -    | P | Predicted subunit of the Multisubunit Na <sup>+</sup> /H <sup>+</sup> antiporter      |
| arCOG03079 | COG02111 | MnhB | P | Multisubunit Na <sup>+</sup> /H <sup>+</sup> antiporter, MnhB subunit                 |
| arCOG03082 | COG01320 | MnhG | P | Multisubunit Na <sup>+</sup> /H <sup>+</sup> antiporter, MnhG subunit                 |
| arCOG03099 | COG01863 | MnhE | P | Multisubunit Na <sup>+</sup> /H <sup>+</sup> antiporter, MnhE subunit                 |
| arCOG03127 | COG01226 | Kch  | P | Ion channel fused to ion transporting domain                                          |
| arCOG03159 | COG00310 | CbiM | P | ABC-type Co <sup>2+</sup> transport system, permease component                        |
| arCOG03303 | COG00614 | FepB | P | ABC-type Fe <sup>3+</sup> -hydroxamate transport system, periplasmic component        |
| arCOG03454 | COG02116 | FocA | P | Formate/nitrite family of transporter                                                 |
| arCOG04145 | COG00168 | TrkG | P | Trk-type K <sup>+</sup> transport system, membrane component                          |
| arCOG04191 | COG02046 | MET3 | P | ATP sulfurylase (sulfate adenylyltransferase)                                         |
| arCOG04330 | COG00672 | FTR1 | P | High-affinity Fe <sup>2+</sup> /Pb <sup>2+</sup> permease                             |
| arCOG05758 |          |      | P | TrkA-C domain containing protein                                                      |
| arCOG00777 | COG02050 | Paal | Q | HGG motif-containing thioesterase, possibly involved in aromatic compounds catabolism |

|            |          |      |   |                                                                                            |
|------------|----------|------|---|--------------------------------------------------------------------------------------------|
| arCOG01521 | COG01233 | -    | Q | Phytoene dehydrogenase or related enzyme                                                   |
| arCOG04507 | COG03350 | -    | Q | Methane/Phenol/Toluene Hydroxylase component                                               |
| arCOG00235 | COG00179 | MhpD | Q | 2-keto-4-pentenoate hydratase/2-oxohepta-3-ene-1,7-dioic acid hydratase (catechol pathway) |
| arCOG01773 | COG00500 |      | Q | SAM-dependent methyltransferase                                                            |
| arCOG01791 | COG00500 |      | Q | SAM-dependent methyltransferase                                                            |
| arCOG02702 | COG00500 |      | Q | SAM-dependent methyltransferase                                                            |
| arCOG00696 | COG01228 | HutI | Q | Imidazolonepropionase or related amidohydrolase                                            |
| arCOG01402 | COG00500 |      | Q | SAM-dependent methyltransferase                                                            |
| arCOG01790 | COG00500 |      | Q | SAM-dependent methyltransferase                                                            |
| arCOG00600 | COG00517 | -    | R | CBS domain                                                                                 |
| arCOG03169 | COG01672 | -    | R | Predicted ATPase (AAA+ superfamily)                                                        |
| arCOG00662 | COG02516 | -    | R | Biotin synthase-related enzyme                                                             |
| arCOG03682 | COG00515 | SPS1 | R | Membrane associated serine/threonine protein kinase                                        |
| arCOG00039 | COG00603 | -    | R | Predicted PP-loop superfamily ATPase                                                       |
| arCOG00503 | COG01237 | -    | R | Metal-dependent hydrolase of the beta-lactamase superfamily II                             |
| arCOG01350 | COG03199 | -    | R | Predicted inorganic polyphosphate/ATP-NAD kinase                                           |
| arCOG03239 | COG01106 | -    | R | ATPase, predicted component of phage defense system                                        |
| arCOG05825 | COG01856 | -    | R | Radical SAM superfamily enzyme                                                             |
| arCOG00040 | COG02236 | -    | R | Predicted phosphoribosyltransferase                                                        |
| arCOG00062 | COG00388 | -    | R | Predicted amidohydrolase                                                                   |
| arCOG00321 | COG00312 | TldD | R | Predicted Zn-dependent protease or their inactivated homolog                               |
| arCOG00322 | COG00312 | TldD | R | Predicted Zn-dependent protease or their inactivated homolog                               |
| arCOG00347 | COG01938 | -    | R | Archaeal enzyme of ATP-grasp superfamily                                                   |
| arCOG00833 | COG00456 | RimI | R | Acetyltransferase (GNAT) family                                                            |
| arCOG00940 | COG00535 | -    | R | Radical SAM superfamily enzyme                                                             |
| arCOG00968 | COG02428 | -    | R | Alpha/beta-knot SAM-dependent RNA methyltransferase                                        |
| arCOG01085 | COG01646 | -    | R | Predicted phosphate-binding enzyme, TIM-barrel fold                                        |
| arCOG01213 | COG00561 | Cof  | R | HAD superfamily hydrolase                                                                  |
| arCOG01492 | COG03383 | -    | R | Uncharacterized anaerobic dehydrogenase                                                    |
| arCOG01648 | COG00596 | MhpC | R | Alpha/beta superfamily hydrolase                                                           |
| arCOG02231 | COG02509 | -    | R | Uncharacterized FAD-dependent dehydrogenase                                                |
| arCOG03639 | COG00121 | -    | R | Predicted glutamine amidotransferase                                                       |
| arCOG04115 | COG01489 | SfsA | R | DNA-binding protein, stimulates sugar fermentation                                         |
| arCOG04227 | COG01832 | -    | R | Predicted CoA-binding protein                                                              |
| arCOG07416 | COG00596 | MhpC | R | Alpha/beta superfamily hydrolase                                                           |
| arCOG00084 | COG01818 | -    | R | Predicted RNA-binding protein, contains THUMP domain                                       |
| arCOG00215 | COG01058 | CinA | R | Predicted nucleotide-utilizing enzyme related to molybdopterin-biosynthesis enzyme MoeA    |
| arCOG00223 | COG02005 | ModE | R | N-terminal domain of molybdenum-binding protein                                            |
| arCOG00302 | COG00613 | -    | R | Metal-dependent phosphoesterase (PHP family)                                               |
| arCOG00353 | COG02262 | HflX | R | GTP-binding protein protease modulator                                                     |
| arCOG00436 | COG00714 | -    | R | MoxR-like ATPase                                                                           |
| arCOG00442 | COG02425 | -    | R | Uncharacterized protein containing a von Willebrand factor type A (vWA) domain             |
| arCOG00500 | COG01234 | ElaC | R | Metal-dependent hydrolase of the beta-lactamase superfamily                                |
| arCOG00504 | COG00491 | GloB | R | Metal-dependent hydrolase of the beta-lactamase superfamily II                             |
| arCOG00578 | COG01645 | -    | R | Uncharacterized Zn-finger containing protein                                               |
| arCOG00932 | COG02108 | -    | R | Uncharacterized conserved protein related to pyruvate formate-lyase activating enzyme      |
| arCOG00933 | COG01964 | -    | R | Radical SAM superfamily enzyme                                                             |

|            |          |        |   |                                                                                  |
|------------|----------|--------|---|----------------------------------------------------------------------------------|
| arCOG01019 | COG04080 | -      | R | SpoU rRNA Methylase family enzyme                                                |
| arCOG01026 | COG01907 | -      | R | Predicted sugar kinase                                                           |
| arCOG01043 | COG01931 | -      | R | Predicted RNA binding protein with dsRBD fold                                    |
| arCOG01084 | COG01694 | MazG   | R | Predicted pyrophosphatase                                                        |
| arCOG01138 | COG01310 | -      | R | Predicted metal-dependent protease of the PAD1/JAB1 superfamily                  |
| arCOG01225 | COG01100 | -      | R | GTPase SAR1 or related small G protein                                           |
| arCOG01285 | COG01545 | -      | R | Predicted nucleic-acid-binding protein containing a Zn-ribbon                    |
| arCOG01377 | COG03379 | -      | R | Phosphodiesterase of AP superfamily                                              |
| arCOG01432 | COG01350 | -      | R | Tryptophan synthase beta-subunit                                                 |
| arCOG01562 | COG05258 | GTPBP1 | R | GTPase                                                                           |
| arCOG01619 | COG00656 | ARA1   | R | Aldo/keto reductase, related to diketogulonate reductase                         |
| arCOG01672 | COG03889 | -      | R | Predicted solute binding protein                                                 |
| arCOG01831 | COG01665 | -      | R | Predicted nucleotidyltransferase                                                 |
| arCOG01849 | COG00663 | PaaY   | R | Isoleucine patch superfamily protein                                             |
| arCOG01857 | COG01303 | -      | R | SpoU rRNA Methylase family enzyme                                                |
| arCOG02064 | COG02210 | -      | R | Peroxisredoxin family protein                                                    |
| arCOG02291 | COG01011 | -      | R | HAD superfamily hydrolase                                                        |
| arCOG02727 | COG01673 | -      | R | Predicted RNA-binding protein containing PUA-domain                              |
| arCOG03042 | COG00457 | NrfG   | R | TPR repeats containing protein                                                   |
| arCOG03233 | COG04938 | -      | R | Predicted ATPase                                                                 |
| arCOG04066 | COG02413 | -      | R | Minimal nucleotidyltransferase                                                   |
| arCOG04127 | COG01341 | -      | R | Predicted GTPase or GTP-binding protein                                          |
| arCOG04151 | COG02237 | -      | R | ABC-type multidrug transport system, permease component                          |
| arCOG04250 | COG03382 | -      | R | Solo B3/4 domain (OB-fold DNA/RNA-binding) of Phe-aaRS-beta                      |
| arCOG04290 | COG01656 | -      | R | PIN-domain and Zn ribbon                                                         |
| arCOG04303 | COG01634 | -      | R | Uncharacterized Rossmann fold enzyme                                             |
| arCOG04311 | COG01896 | -      | R | Predicted hydrolase of HD superfamily                                            |
| arCOG04426 | COG00375 | HybF   | R | Zn finger protein HypA/HybF (possibly regulating hydrogenase expression)         |
| arCOG04458 | COG02457 | -      | R | Uncharacterized protein of DIM6/NTAB family                                      |
| arCOG00036 | COG02102 | -      | R | Predicted ATPase of PP-loop superfamily                                          |
| arCOG00043 | COG01606 | -      | R | ATP-utilizing enzyme of the PP-loop superfamily                                  |
| arCOG00054 | COG02521 | -      | R | Predicted archaeal methyltransferase                                             |
| arCOG00056 | COG01818 | -      | R | Predicted RNA-binding protein, contains THUMP domain                             |
| arCOG00185 | COG01123 | -      | R | ATPase component of various ABC-type transport system, contain duplicated ATPase |
| arCOG00260 | COG04603 | -      | R | ABC-type uncharacterized transport system, permease component                    |
| arCOG00261 | COG01079 | -      | R | Uncharacterized ABC-type transport system, permease component                    |
| arCOG00266 | COG02041 | -      | R | Sulfite oxidase or related enzyme                                                |
| arCOG00354 | COG01100 | -      | R | GTPase SAR1 or related small G protein                                           |
| arCOG00362 | COG02229 | -      | R | Predicted GTPase                                                                 |
| arCOG00441 | COG00714 | -      | R | MoxR-like ATPase                                                                 |
| arCOG00498 | COG00491 | GloB   | R | Metal-dependent hydrolase of the beta-lactamase superfamily II                   |
| arCOG00606 | COG00517 | -      | R | CBS domain                                                                       |
| arCOG00691 | COG01574 | -      | R | Predicted metal-dependent hydrolase with the TIM-barrel fold                     |
| arCOG00754 | COG00579 | -      | R | Malate/quinone oxidoreductase or related dehydrogenase                           |
| arCOG00887 | COG01483 | -      | R | Predicted ATPase (AAA+ superfamily)                                              |
| arCOG00888 | COG01483 | -      | R | Predicted ATPase (AAA+ superfamily)                                              |
| arCOG00893 | COG01831 | -      | R | Predicted metal-dependent hydrolase (urease superfamily)                         |
| arCOG00951 | COG02100 | -      | R | Radical SAM superfamily enzyme                                                   |
| arCOG01093 | COG02406 | -      | R | Protein distantly related to bacterial ferritins                                 |
| arCOG01108 | COG01473 | AbgB   | R | Metal-dependent amidase/aminoacylase/carboxypeptidase                            |



|            |          |      |   |                                                                                                 |
|------------|----------|------|---|-------------------------------------------------------------------------------------------------|
| arCOG01139 | COG01310 | -    | R | Predicted metal-dependent protease of the PADI1/JAB1 superfamily                                |
| arCOG01141 | COG00622 | -    | R | Phosphoesterase                                                                                 |
| arCOG01153 | COG01409 | Icc  | R | Predicted phosphohydrolase                                                                      |
| arCOG01156 | COG01408 | -    | R | Calcineurin-like phosphohydrolase                                                               |
| arCOG01195 | COG01708 | -    | R | Minimal nucleotidyltransferase                                                                  |
| arCOG01201 | COG01708 | -    | R | Minimal nucleotidyltransferase                                                                  |
| arCOG01202 | COG01708 | -    | R | Minimal nucleotidyltransferase                                                                  |
| arCOG01208 | COG01708 | -    | R | Minimal nucleotidyltransferase                                                                  |
| arCOG01211 | COG01708 | -    | R | Minimal nucleotidyltransferase                                                                  |
| arCOG01215 | COG03769 | -    | R | HAD superfamily hydrolase                                                                       |
| arCOG01223 | COG01019 | -    | R | Predicted nucleotidyltransferase                                                                |
| arCOG01229 | COG02403 | -    | R | Predicted GTPase                                                                                |
| arCOG01383 | COG01216 | -    | R | Predicted glycosyltransferase                                                                   |
| arCOG01395 | COG01817 | -    | R | Lipid-A-disaccharide synthase related glycosyltransferase                                       |
| arCOG01425 |          |      | R | RecB family nuclease with coiled-coil N-terminal domain                                         |
| arCOG01565 | COG00618 | -    | R | Exopolyphosphatase-related protein                                                              |
| arCOG01622 | COG00673 | MviM | R | Predicted dehydrogenase                                                                         |
| arCOG01801 | COG02358 | Imp  | R | TRAP-type uncharacterized transport system, periplasmic component                               |
| arCOG01806 |          |      | R | ACT domain containing protein                                                                   |
| arCOG01848 | COG00110 | WbbJ | R | Acetyltransferase (isoleucine patch superfamily)                                                |
| arCOG01860 | COG01418 | -    | R | Predicted HD superfamily hydrolase                                                              |
| arCOG01906 | COG04666 | -    | R | TRAP-type uncharacterized transport system, fused permease component                            |
| arCOG01931 | COG02159 | -    | R | Predicted metal-dependent hydrolase of the TIM-barrel fold                                      |
| arCOG01963 | COG03273 | -    | R | PhoU-like domain fused to TrkA-C domain                                                         |
| arCOG01982 | COG00434 | SgcQ | R | Predicted TIM-barrel enzyme                                                                     |
| arCOG02016 | COG01853 | -    | R | Conserved protein/domain typically associated with flavoprotein oxygenase, DIM6/NTAB family     |
| arCOG02017 | COG01853 | -    | R | Conserved protein/domain typically associated with flavoprotein oxygenase, DIM6/NTAB family     |
| arCOG02028 | COG05012 | -    | R | Predicted cobalamin binding protein                                                             |
| arCOG02035 | COG03894 | -    | R | Uncharacterized metal-binding protein                                                           |
| arCOG02105 | COG01708 | -    | R | Minimal nucleotidyltransferase                                                                  |
| arCOG02107 | COG01708 | -    | R | Minimal nucleotidyltransferase                                                                  |
| arCOG02238 | COG01342 | -    | R | Predicted DNA-binding protein                                                                   |
| arCOG02240 | COG01942 | -    | R | 4-oxalocrotonate tautomerase related protein                                                    |
| arCOG02258 | COG03390 | -    | R | RPA family protein, a subunit of RPA complex in <i>P. uriosus</i>                               |
| arCOG02284 | COG04880 | -    | R | Secreted protein containing C-terminal beta-propeller domain distantly related to WD-40 repeats |
| arCOG02303 | COG00496 | SurE | R | Predicted acid phosphatase                                                                      |
| arCOG02412 | COG01598 | -    | R | Predicted nuclease of the RNase H fold, HicB family                                             |
| arCOG02431 | COG01611 | -    | R | Predicted Rossmann fold nucleotide-binding protein                                              |
| arCOG02465 | COG01691 | -    | R | NCAIR mutase (PurE)-related protein                                                             |
| arCOG02579 | COG00727 | -    | R | Predicted Fe-S-cluster oxidoreductase                                                           |
| arCOG02616 | COG00535 | -    | R | Radical SAM superfamily enzyme                                                                  |
| arCOG02767 | COG01266 | -    | R | Metal-dependent membrane protease, CAAX family                                                  |
| arCOG02768 | COG01266 | -    | R | Metal-dependent membrane protease, CAAX family                                                  |
| arCOG02828 | COG03367 | -    | R | NAD dependent epimerase/dehydratase family                                                      |
| arCOG02902 | COG02304 | -    | R | Uncharacterized protein containing a von Willebrand factor type A (vWA) domain                  |
| arCOG02959 | COG02234 | Iap  | R | Predicted aminopeptidase                                                                        |
| arCOG02986 | COG01268 | BioY | R | Uncharacterized conserved protein                                                               |
| arCOG02999 | COG01917 | -    | R | Cupin domain containing protein                                                                 |
| arCOG03045 | COG00457 | NrfG | R | TPR repeats containing protein                                                                  |
| arCOG03086 | COG01724 | -    | R | Predicted RNA binding protein (dsRBD-like fold), HicA family                                    |

|            |          |         |   |                                                                                                                                           |
|------------|----------|---------|---|-------------------------------------------------------------------------------------------------------------------------------------------|
| arCOG03241 | COG04637 | -       | R | Predicted ATPase                                                                                                                          |
| arCOG03509 | COG03291 | -       | R | Cell surface protein, containing PKD repeats                                                                                              |
| arCOG03647 | COG02388 | -       | R | Acetyltransferase (GNAT) family                                                                                                           |
| arCOG03850 | COG04122 | -       | R | Predicted O-methyltransferase                                                                                                             |
| arCOG04004 | COG00666 | Arp     | R | Ankyrin repeats containing protein                                                                                                        |
| arCOG04052 | COG04756 | -       | R | Predicted cation transporter                                                                                                              |
| arCOG04197 |          |         | R | Transposase related protein                                                                                                               |
| arCOG04212 | COG01661 | -       | R | Predicted DNA-binding protein with PD1-like DNA-binding motif                                                                             |
| arCOG04225 | COG02110 | -       | R | Predicted phosphatase homologous to the C-terminal domain of histone macroH2A1                                                            |
| arCOG04230 | COG03294 | -       | R | HD superfamily hydrolase                                                                                                                  |
| arCOG04278 | COG01679 | -       | R | Predicted aconitase                                                                                                                       |
| arCOG04297 | COG02401 | -       | R | ABC-type ATPase fused to a predicted acetyltransferase domain                                                                             |
| arCOG04359 | COG02517 | -       | R | Predicted RNA-binding protein containing a C-terminal EMAP domain                                                                         |
| arCOG04410 | COG01578 | -       | R | Predicted ATP-grasp domain fused to redox center                                                                                          |
| arCOG04463 | COG03389 | -       | R | Presenilin-like membrane protease, A22 family                                                                                             |
| arCOG04756 | COG00679 | -       | R | Predicted permease                                                                                                                        |
| arCOG05120 | COG05014 | -       | R | Radical SAM superfamily enzyme                                                                                                            |
| arCOG05346 |          |         | R | PP-loop superfamily ATPase fused to Zn-finger domain                                                                                      |
| arCOG05613 |          |         | R | Predicted DEAD-box helicase/ATPase                                                                                                        |
| arCOG05741 |          |         | R | Nucleic acid binding, OB-fold                                                                                                             |
| arCOG06126 | COG01811 | -       | R | Uncharacterized membrane protein, possible Na <sup>+</sup> channel or pump                                                                |
| arCOG06897 | COG03919 | -       | R | Predicted ATP-grasp enzyme                                                                                                                |
| arCOG07501 | COG01994 | SpoIVFB | R | Zn-dependent protease                                                                                                                     |
| arCOG07614 | COG00121 | -       | R | Predicted glutamine amidotransferase                                                                                                      |
| arCOG07790 |          |         | R | D-glucuronyl C5-epimerase C-terminal domain related protein                                                                               |
| arCOG07957 | COG02342 | -       | R | Uncharacterized TIM barrel protein                                                                                                        |
| arCOG07960 | COG02607 | -       | R | ATPase (AAA+ superfamily)                                                                                                                 |
| arCOG08578 |          |         | R | P-loop NTPase                                                                                                                             |
| arCOG04321 | COG02848 | -       | S | Uncharacterized conserved protein with similarity to Ribonucleotide reductase and Pyruvate formate lyase                                  |
| arCOG01096 | COG01814 | -       | S | Ferritin-like domain containing protein                                                                                                   |
| arCOG01091 | COG01814 | -       | S | Uncharacterized membrane protein                                                                                                          |
| arCOG04733 | COG02042 | -       | S | Uncharacterized conserved protein, contains Fer4-like metal-binding domain ortholog of eukaryotic RNase L inhibitor RLI N-terminal domain |
| arCOG01302 | COG01531 | -       | S | Uncharacterized conserved protein                                                                                                         |
| arCOG01907 | COG02013 | -       | S | Uncharacterized conserved protein                                                                                                         |
| arCOG01921 | COG02083 | -       | S | Uncharacterized conserved protein                                                                                                         |
| arCOG02159 | COG04089 | -       | S | Predicted membrane protein                                                                                                                |
| arCOG02734 | COG01433 | -       | S | NifX family protein                                                                                                                       |
| arCOG02994 | COG01917 | -       | S | Cupin domain containing protein                                                                                                           |
| arCOG03117 | COG00586 | DedA    | S | Uncharacterized membrane-associated protein, DedA family                                                                                  |
| arCOG03142 |          |         | S | Uncharacterized conserved protein                                                                                                         |
| arCOG03216 | COG02014 | -       | S | Uncharacterized conserved protein                                                                                                         |
| arCOG03229 | COG02454 | -       | S | Uncharacterized conserved protein                                                                                                         |
| arCOG04076 | COG01909 | -       | S | Uncharacterized conserved protein                                                                                                         |
| arCOG04124 | COG02835 | -       | S | Uncharacterized conserved protein                                                                                                         |
| arCOG04140 | COG01888 | -       | S | Uncharacterized conserved protein                                                                                                         |
| arCOG04308 | COG01698 | -       | S | Uncharacterized conserved protein                                                                                                         |
| arCOG04351 | COG03356 | -       | S | Predicted membrane protein                                                                                                                |
| arCOG04373 | COG00011 | -       | S | Uncharacterized conserved protein                                                                                                         |
| arCOG05978 |          |         | S | Extracellular protein containing Kelch and FN3 domains                                                                                    |
| arCOG06027 | COG03189 | -       | S | Uncharacterized conserved protein                                                                                                         |
| arCOG07088 |          |         | S | Uncharacterized conserved protein                                                                                                         |
| arCOG00369 | COG04717 | -       | S | Uncharacterized conserved protein                                                                                                         |
| arCOG00372 |          |         | S | Uncharacterized conserved protein                                                                                                         |
| arCOG00723 | COG05483 | -       | S | Uncharacterized conserved protein                                                                                                         |
| arCOG00761 | COG01720 | -       | S | Uncharacterized conserved protein                                                                                                         |

|            |          |        |   |                                                                               |
|------------|----------|--------|---|-------------------------------------------------------------------------------|
| arCOG00899 | COG00392 | -      | S | Uncharacterized conserved membrane protein                                    |
| arCOG00908 | COG03286 | -      | S | Uncharacterized conserved protein                                             |
| arCOG01119 | COG04274 | -      | S | GYP domain, alpha/beta barrel superfamily                                     |
| arCOG01314 |          |        | S | Uncharacterized conserved membrane protein                                    |
| arCOG01471 | COG03945 | -      | S | Hemerythrin HHE cation binding domain containing protein                      |
| arCOG01472 | COG02461 | -      | S | Hemerythrin HHE cation binding domain containing protein                      |
| arCOG01668 | COG03370 | -      | S | Uncharacterized conserved protein                                             |
| arCOG01724 | COG04072 | -      | S | Uncharacterized conserved protein                                             |
| arCOG01734 | COG04933 | -      | S | Uncharacterized conserved protein                                             |
| arCOG01917 |          |        | S | Zn-ribbon domain containing protein                                           |
| arCOG01996 | COG01300 | SpolIM | S | Uncharacterized membrane protein                                              |
| arCOG02008 | COG03371 | -      | S | Predicted membrane protein                                                    |
| arCOG02024 | COG04881 | -      | S | Predicted membrane protein                                                    |
| arCOG02078 | COG01852 | -      | S | Uncharacterized conserved protein                                             |
| arCOG02081 | COG01470 | -      | S | Predicted membrane protein                                                    |
| arCOG02087 | COG01470 | -      | S | Predicted membrane protein                                                    |
| arCOG02108 | COG02445 | -      | S | HEPN domain containing protein                                                |
| arCOG02109 | COG02445 | -      | S | HEPN domain containing protein                                                |
| arCOG02245 | COG01836 | -      | S | Predicted membrane protein                                                    |
| arCOG02264 | COG01808 | -      | S | Predicted membrane protein                                                    |
| arCOG02270 | COG05428 | -      | S | Uncharacterized conserved small protein                                       |
| arCOG02287 | COG00393 | -      | S | Uncharacterized beta/alpha-propeller protein, likely forms oligomers          |
| arCOG02396 |          |        | S | Uncharacterized conserved protein                                             |
| arCOG02408 | COG01432 | -      | S | Uncharacterized conserved protein                                             |
| arCOG02487 |          |        | S | Cell surface protein                                                          |
| arCOG02488 |          |        | S | Cell surface protein                                                          |
| arCOG02491 | COG02319 | -      | S | WD40 repeats containing protein                                               |
| arCOG02497 | COG03420 | -      | S | S-layer protein                                                               |
| arCOG02508 | COG03291 | -      | S | PKD repeats containing protein                                                |
| arCOG02510 | COG03291 | -      | S | PKD repeats containing protein                                                |
| arCOG02532 | COG03291 | -      | S | beta-propeller repeat protein fused to CARDB-like adhesion domain             |
| arCOG02540 | COG03291 | -      | S | PKD repeats containing protein                                                |
| arCOG02545 | COG03291 | -      | S | NosD-like periplasmic protein fused to PKD repeat domain                      |
| arCOG02556 | COG01520 | -      | S | WD40-like repeat                                                              |
| arCOG02559 |          |        | S | Cell surface protein                                                          |
| arCOG02701 | COG01641 | -      | S | Uncharacterized conserved protein                                             |
| arCOG02835 | COG02324 | -      | S | Uncharacterized conserved membrane protein                                    |
| arCOG02879 |          |        | S | Uncharacterized conserved protein                                             |
| arCOG02884 | COG04743 | -      | S | Predicted membrane protein                                                    |
| arCOG03005 | COG04997 | -      | S | Uncharacterized conserved protein, contains double-stranded beta-helix domain |
| arCOG03188 |          |        | S | Uncharacterized conserved protein                                             |
| arCOG03206 | COG01822 | -      | S | Predicted archaeal membrane protein                                           |
| arCOG03270 |          |        | S | Uncharacterized conserved protein, contains DUF11 domain                      |
| arCOG03333 | COG04273 | -      | S | DGC domain implicated in zinc binding                                         |
| arCOG03414 |          |        | S | Uncharacterized conserved protein                                             |
| arCOG03427 | COG02510 | -      | S | Predicted membrane protein                                                    |
| arCOG03442 |          |        | S | Uncharacterized conserved membrane protein                                    |
| arCOG03460 | COG02120 | -      | S | Uncharacterized protein, LmbE homolog                                         |
| arCOG03511 | COG05306 | -      | S | Uncharacterized conserved protein                                             |
| arCOG03633 | COG01714 | -      | S | Predicted membrane protein/domain                                             |
| arCOG03754 |          |        | S | Uncharacterized conserved protein                                             |
| arCOG03794 | COG03601 | -      | S | Predicted membrane protein                                                    |
| arCOG03829 |          |        | S | Uncharacterized conserved protein                                             |
| arCOG03835 |          |        | S | Uncharacterized conserved membrane protein                                    |
| arCOG03841 | COG03535 | -      | S | Uncharacterized conserved protein                                             |
| arCOG03911 | COG03462 | -      | S | Predicted membrane protein                                                    |
| arCOG03942 |          |        | S | Uncharacterized conserved protein                                             |
| arCOG03957 | COG04902 | -      | S | Uncharacterized conserved protein                                             |

|            |          |   |   |                                                                    |
|------------|----------|---|---|--------------------------------------------------------------------|
| arCOG04002 |          |   | S | Uncharacterized conserved protein                                  |
| arCOG04024 |          |   | S | Uncharacterized conserved protein                                  |
| arCOG04025 |          |   | S | Uncharacterized conserved protein                                  |
| arCOG04039 |          |   | S | Uncharacterized conserved protein                                  |
| arCOG04058 | COG01872 | - | S | Uncharacterized conserved protein                                  |
| arCOG04317 | COG04732 | - | S | Predicted membrane protein                                         |
| arCOG04337 | COG01504 | - | S | Uncharacterized conserved protein                                  |
| arCOG04343 | COG01751 | - | S | Uncharacterized conserved protein                                  |
| arCOG04344 | COG04818 | - | S | Predicted membrane protein                                         |
| arCOG04354 | COG01906 | - | S | Uncharacterized conserved protein                                  |
| arCOG04394 | COG01416 | - | S | Uncharacterized conserved protein                                  |
| arCOG04437 | COG03863 | - | S | Uncharacterized distant relative of cell wall-associated hydrolase |
| arCOG04467 |          |   | S | Uncharacterized conserved protein                                  |
| arCOG04477 | COG01860 | - | S | Uncharacterized conserved protein                                  |
| arCOG04483 | COG04739 | - | S | Uncharacterized protein containing a ferredoxin domain             |
| arCOG04484 | COG05658 | - | S | Predicted integral membrane protein                                |
| arCOG04488 | COG02164 | - | S | Uncharacterized conserved protein                                  |
| arCOG04492 | COG02028 | - | S | Uncharacterized conserved protein                                  |
| arCOG04500 |          |   | S | Uncharacterized conserved protein                                  |
| arCOG04609 |          |   | S | Predicted lipoprotein                                              |
| arCOG04612 | COG04044 | - | S | Uncharacterized conserved protein                                  |
| arCOG04705 | COG02098 | - | S | Uncharacterized conserved protein                                  |
| arCOG04797 |          |   | S | Uncharacterized conserved protein                                  |
| arCOG04807 | COG01297 | - | S | Predicted membrane protein                                         |
| arCOG04811 | COG02383 | - | S | Uncharacterized conserved membrane protein, Fun14 family           |
| arCOG04849 |          |   | S | Uncharacterized conserved protein                                  |
| arCOG04883 |          |   | S | Uncharacterized conserved protein                                  |
| arCOG04893 | COG04022 | - | S | Uncharacterized conserved protein                                  |
| arCOG04938 |          |   | S | Uncharacterized conserved protein                                  |
| arCOG05048 |          |   | S | Uncharacterized conserved protein                                  |
| arCOG05079 | COG01542 | - | S | Uncharacterized conserved protein                                  |
| arCOG05763 | COG04003 | - | S | Uncharacterized conserved protein                                  |
| arCOG05783 |          |   | S | Uncharacterized conserved protein                                  |
| arCOG05791 |          |   | S | Uncharacterized cell surface protein, containing DUF11 domain      |
| arCOG05908 | COG01633 | - | S | Ferritin-like domain                                               |
| arCOG06053 |          |   | S | Uncharacterized conserved protein                                  |
| arCOG06115 |          |   | S | Uncharacterized conserved protein                                  |
| arCOG06133 |          |   | S | Uncharacterized conserved protein                                  |
| arCOG06147 |          |   | S | Uncharacterized conserved protein                                  |
| arCOG06398 |          |   | S | Uncharacterized conserved protein                                  |
| arCOG06529 |          |   | S | Uncharacterized conserved protein                                  |
| arCOG06566 |          |   | S | Uncharacterized conserved membrane protein                         |
| arCOG06655 |          |   | S | Uncharacterized conserved protein                                  |
| arCOG06883 |          |   | S | Zn-ribbon domain containing protein                                |
| arCOG06986 |          |   | S | Uncharacterized conserved protein                                  |
| arCOG07110 | COG05617 | - | S | Predicted integral membrane protein                                |
| arCOG07169 |          |   | S | Uncharacterized conserved protein                                  |
| arCOG07425 |          |   | S | Uncharacterized conserved protein                                  |
| arCOG07491 |          |   | S | Uncharacterized conserved protein                                  |
| arCOG07492 |          |   | S | Uncharacterized conserved protein                                  |
| arCOG07520 | COG02442 | - | S | Uncharacterized conserved protein                                  |
| arCOG07527 |          |   | S | Predicted metal-binding protein                                    |
| arCOG07532 |          |   | S | Uncharacterized conserved protein                                  |
| arCOG07571 |          |   | S | Uncharacterized conserved membrane protein                         |
| arCOG07626 |          |   | S | Uncharacterized conserved protein                                  |
| arCOG07703 |          |   | S | Uncharacterized conserved protein                                  |
| arCOG07842 |          |   | S | Uncharacterized conserved protein                                  |
| arCOG08221 |          |   | S | Uncharacterized conserved protein                                  |
| arCOG08303 | COG02880 | - | S | Uncharacterized conserved protein                                  |
| arCOG08358 |          |   | S | Uncharacterized conserved protein                                  |
| arCOG09164 | COG01266 | - | S | Uncharacterized conserved protein                                  |
| arCOG09425 |          |   | S | Uncharacterized conserved protein                                  |
| arCOG09431 |          |   | S | Uncharacterized conserved protein                                  |
| arCOG09434 |          |   | S | Uncharacterized conserved protein                                  |

|            |          |           |   |                                                                                                      |
|------------|----------|-----------|---|------------------------------------------------------------------------------------------------------|
| arCOG09748 |          |           | S | Uncharacterized conserved protein                                                                    |
| arCOG10126 | COG01422 |           | S | Uncharacterized conserved protein                                                                    |
| arCOG10150 |          |           | S | Uncharacterized conserved protein                                                                    |
| arCOG10161 |          |           | S | Uncharacterized conserved protein                                                                    |
| arCOG10167 |          |           | S | Uncharacterized conserved protein                                                                    |
| arCOG10269 |          |           | S | Uncharacterized conserved protein                                                                    |
| arCOG02053 | COG00589 | UspA      | T | Nucleotide-binding protein, UspA family                                                              |
| arCOG04941 | COG03830 | -         | T | ACT domain-containing protein                                                                        |
| arCOG03413 | COG02453 | CDC14     | T | Protein-tyrosine phosphatase<br>Serine/threonine protein phosphatase PP2A family                     |
| arCOG01143 | COG00639 | ApaH      | T |                                                                                                      |
| arCOG00449 | COG00589 | UspA      | T | Nucleotide-binding protein, UspA family<br>RecA-superfamily ATPase implicated in signal transduction |
| arCOG01174 | COG00467 | RAD55     | T |                                                                                                      |
| arCOG05302 | COG00631 | PTC1      | T | Serine/threonine protein phosphatase<br>Sec-independent protein secretion pathway component TatC     |
| arCOG01919 | COG00805 | TatC      | U | Sec-independent protein secretion pathway component                                                  |
| arCOG02694 | COG01826 | TatA      | U |                                                                                                      |
| arCOG02957 | COG04023 | SBH1      | U | Preprotein translocase subunit Sec61beta                                                             |
| arCOG01217 | COG01400 | SEC65     | U | Signal recognition particle 19 kDa protein                                                           |
| arCOG01227 | COG00552 | FtsY      | U | Signal recognition particle GTPase                                                                   |
| arCOG01228 | COG00541 | Ffh       | U | Signal recognition particle GTPase<br>Periplasmic component of the Tol biopolymer transport system   |
| arCOG03383 | COG00823 | TolB      | U | Type IV secretory pathway, VirB4 component                                                           |
| arCOG04035 | COG03451 | VirB4     | U | Type IV secretory pathway, VirB4 component                                                           |
| arCOG07496 | COG03451 | VirB4     | U | Type IV secretory pathway, VirB4 component                                                           |
| arCOG00194 | COG01131 | CcmA      | V | ABC-type multidrug transport system, ATPase component                                                |
| arCOG02730 | COG01848 | -         | V | PIN domain containing protein<br>CRISPR-associated protein Cas4, RecB family exonuclease             |
| arCOG00790 | COG01468 | Cas4      | V |                                                                                                      |
| arCOG01009 | COG03609 | -         | V | Ribbon-helix-helix protein, copG family                                                              |
| arCOG03779 | COG01401 | McrB      | V | GTPase subunit of restriction endonuclease                                                           |
| arCOG07589 | COG01848 | -         | V | PIN domain containing protein                                                                        |
| arCOG00713 | COG01848 | -         | V | PIN domain containing protein                                                                        |
| arCOG00715 | COG01848 | -         | V | PIN domain containing protein<br>ABC-type multidrug transport system, permease component             |
| arCOG01463 | COG00842 | -         | V |                                                                                                      |
| arCOG02219 | COG01487 | VapC      | V | PIN domain containing protein<br>Type I restriction-modification system methyltransferase subunit    |
| arCOG02632 | COG00286 | HsdM      | V |                                                                                                      |
| arCOG02681 | COG01753 | -         | V | Predicted antitoxin, copG family<br>CRISPR system related protein, RAMP superfamily Cas7 group       |
| arCOG03482 |          | Cas7/Csc2 | V |                                                                                                      |
| arCOG04502 | COG02402 | -         | V | PIN domain containing protein                                                                        |
| arCOG08216 |          | -         | V | Antitoxin MazE superfamily protein                                                                   |
| arCOG00710 | COG01848 | -         | V | PIN domain containing protein                                                                        |
| arCOG00711 | COG01848 | -         | V | PIN domain containing protein                                                                        |
| arCOG00717 | COG02405 | -         | V | PIN domain containing protein                                                                        |
| arCOG00719 | COG02405 | -         | V | PIN domain containing protein                                                                        |
| arCOG00720 | COG01458 | -         | V | PIN domain containing protein<br>Predicted antitoxins containing the HTH domain                      |
| arCOG00722 | COG02886 | -         | V |                                                                                                      |
| arCOG00730 | COG01848 | -         | V | PIN domain containing protein<br>CRISPR-associated protein Cas4, RecB family exonuclease             |
| arCOG00786 | COG01468 | Cas4      | V | Transcriptional regulator, CopG/Arc/MetJ family (DNA-binding and a metal-binding domains)            |
| arCOG01008 | COG00864 | NikR      | V | CRISPR system related protein, large subunit of CASCADE complex                                      |
| arCOG01441 |          | Cas8a2    | V |                                                                                                      |
| arCOG01444 | COG01203 | Cas3      | V | CRISPR-associated helicase Cas3                                                                      |
| arCOG01731 | COG00534 | NorM      | V | Na <sup>+</sup> -driven multidrug efflux pump                                                        |
| arCOG02121 | COG05378 | -         | V | PIN domain containing protein<br>Type II restriction enzyme, methylase subunit                       |
| arCOG02635 | COG01002 | -         | V | CRISPR system related protein, small subunit of CASCADE complex                                      |
| arCOG02654 | COG03337 | -         | V |                                                                                                      |

|                     |          |           |   |                                                                                     |
|---------------------|----------|-----------|---|-------------------------------------------------------------------------------------|
| arCOG02658          | COG01337 | Cas7/Csm3 | V | CRISPR system related protein, RAMP superfamily Cas7 group                          |
| arCOG02666          | COG01353 | Cas10     | V | CRISPR associated protein, polymerase-related domain and HD family nuclease         |
| arCOG02672          | COG01688 | Cas5      | V | CRISPR system related protein Cas5, RAMP superfamily                                |
| arCOG03222          | COG01567 | Cas5/Csm4 | V | CRISPR system related protein, RAMP superfamily Cas5 group                          |
| arCOG03590          |          |           | V | Addiction module toxin, Txe/YoeB family                                             |
| arCOG03718          | COG01332 | Cas7/Csm5 | V | CRISPR system related protein, RAMP superfamily Cas7 group                          |
| arCOG03788          | COG05608 |           | V | LEA14-like desiccation related protein                                              |
| arCOG03823          |          |           | V | CRISPR system associated protein, predicted small subunit of CASCADE complex        |
| arCOG03839          | COG02253 | -         | V | Predicted component of viral defense system                                         |
| arCOG03847          | COG01517 |           | V | CRISPR system related protein, COG1517 family                                       |
| arCOG03886          |          |           | V | CopG family DNA-binding protein                                                     |
| arCOG03891          | COG01367 | Cas7/Cmr1 | V | CRISPR system related protein, RAMP superfamily Cas7 group                          |
| arCOG04793          | COG05340 | -         | V | Transcriptional regulator, predicted component of viral defense system              |
| arCOG05206          |          |           | V | Addiction module toxin, Txe/YoeB family, similar to arCOG03590                      |
| arCOG05269          |          | Cas8a1    | V | CRISPR-associated protein, large subunit of CASCADE complex, MTH1090 family         |
| arCOG05297          | COG02402 | -         | V | PIN domain containing protein                                                       |
| arCOG05724          | COG02810 | -         | V | Predicted type IV restriction endonuclease                                          |
| arCOG06487          | COG01421 |           | V | CRISPR system related protein, small subunit of CASCADE complex                     |
| arCOG06948          |          |           | V | PIN domain                                                                          |
| arCOG06987          |          |           | V | CopG-family DNA-binding protein                                                     |
| arCOG07235          |          |           | V | RHH/CopG DNA binding protein                                                        |
| arCOG07514          |          |           | V | RHH/CopG family DNA-binding protein                                                 |
| arCOG07641          | COG01517 |           | V | CRISPR system related protein, COG1517 family                                       |
| arCOG07794          | COG01401 | McrB      | V | GTPase subunit of restriction endonuclease                                          |
| arCOG07904          | COG04634 |           | V | PIN domain                                                                          |
| arCOG10147          |          |           | V | CRISPR-associated endoribonuclease Cas6                                             |
| <b>Gain in Nst1</b> |          |           |   |                                                                                     |
| arCOG00420          | COG01085 | GalT      | C | Galactose-1-phosphate uridylyltransferase                                           |
| arCOG02721          | COG01271 | CydA      | C | Cytochrome bd-type quinol oxidase, subunit 1                                        |
| arCOG05072          | COG02414 | -         | C | Aldehyde:ferredoxin oxidoreductase                                                  |
| arCOG03672          |          |           | E | Thermopain-like protease                                                            |
| arCOG01770          | COG00705 |           | E | Rhomboid family membrane associated serine protease                                 |
| arCOG03611          |          |           | E | Peptidase C1A subfamily                                                             |
| arCOG04490          | COG01945 | -         | E | Pyruvoyl-dependent arginine decarboxylase (PvlArgDC)                                |
| arCOG03713          | COG00209 | NrdA      | F | Ribonucleotide reductase associated ATP-cone domain                                 |
| arCOG00090          | COG00518 | GuaA      | F | GMP synthase - Glutamine amidotransferase domain                                    |
| arCOG03214          | COG00207 | ThyA      | F | Thymidylate synthase                                                                |
| arCOG03287          | COG03408 | GDB1      | G | Glycogen debranching enzyme                                                         |
| arCOG00052          | COG00166 | Pgi       | G | Glucose-6-phosphate isomerase                                                       |
| arCOG01993          | COG00588 | GpmA      | G | Phosphoglycerate mutase 1                                                           |
| arCOG05412          | COG02723 | BglB      | G | Beta-glucosidase/6-phospho-beta-glucosidase/beta-galactosidase                      |
| arCOG00408          | COG01190 | LysU      | J | Lysyl-tRNA synthetase (class II)                                                    |
| arCOG03698          | COG04344 | -         | K | Predicted transcriptional regulator, contains HTH domain                            |
| arCOG00395          | COG02512 | -         | K | Predicted membrane-associated transcriptional regulator                             |
| arCOG02217          |          |           | K | Predicted antitoxin associated with PIN domain                                      |
| arCOG04032          |          |           | L | Eukaryotic-type DNA primase, catalytic (small) subunit homolog, fused to HTH domain |

|            |          |      |   |                                                                           |
|------------|----------|------|---|---------------------------------------------------------------------------|
| arCOG00461 | COG02231 | -    | L | Uncharacterized protein related to Endonuclease III                       |
| arCOG02207 | COG00708 | XthA | L | Exonuclease III                                                           |
| arCOG01397 | COG00463 | WcaA | M | Glycosyltransferase                                                       |
| arCOG01391 | COG01215 | -    | M | Glycosyltransferase                                                       |
| arCOG01573 | COG00668 | MscS | M | Small-conductance mechanosensitive channel                                |
| arCOG05398 | COG00463 |      | M | Glycosyltransferase family A                                              |
| arCOG01417 | COG00438 | RfaG | M | Glycosyltransferase                                                       |
| arCOG04922 | COG00438 | RfaG | M | Glycosyltransferase                                                       |
| arCOG07390 | COG00438 | RfaG | M | Glycosyltransferase                                                       |
| arCOG02964 | COG03351 | FlaD | N | Putative archaeal flagellar protein D/E                                   |
| arCOG03871 |          |      | N | Flagellar protein G                                                       |
| arCOG02868 | COG01651 | DsbG | O | Protein-disulfide isomerase                                               |
| arCOG01400 | COG00500 |      | Q | SAM-dependent methyltransferase                                           |
| arCOG00423 | COG02404 | -    | R | Predicted phosphohydrolase (DHH superfamily)                              |
| arCOG01154 | COG04186 | -    | R | Calcineurin-like phosphoesterase superfamily protein                      |
| arCOG00607 | COG01994 | -    | R | Zn-dependent protease fused to CBS domain                                 |
| arCOG01197 | COG01708 | -    | R | Minimal nucleotidyltransferase                                            |
| arCOG03461 | COG04049 | -    | R | Uncharacterized protein containing archaeal-type C2H2 Zn-finger           |
| arCOG10265 |          |      | S | Uncharacterized conserved protein                                         |
| arCOG10353 |          |      | S | Uncharacterized conserved protein                                         |
| arCOG01667 | COG03369 | -    | S | Zinc finger domain containing protein (CDGSH-type)                        |
| arCOG01669 | COG03370 | -    | S | Uncharacterized conserved protein                                         |
| arCOG03119 |          |      | S | DedA family membrane protein                                              |
| arCOG03869 |          |      | S | Uncharacterized conserved protein                                         |
| arCOG03113 | COG01430 | -    | S | Uncharacterized conserved protein                                         |
| arCOG03749 | COG04243 | -    | S | Predicted membrane protein                                                |
| arCOG03962 | COG02340 | -    | S | Uncharacterized protein with SCP/PR1 domains                              |
| arCOG04574 | COG01704 | LemA | S | Uncharacterized conserved protein                                         |
| arCOG05350 |          |      | S | Uncharacterized conserved protein                                         |
| arCOG05360 |          |      | S | Uncharacterized conserved protein                                         |
| arCOG05419 |          |      | S | Uncharacterized conserved protein                                         |
| arCOG05534 |          |      | S | Uncharacterized conserved protein                                         |
| arCOG05631 |          |      | S | Uncharacterized conserved protein                                         |
| arCOG06218 |          |      | S | Uncharacterized conserved protein                                         |
| arCOG06957 |          |      | S | Uncharacterized conserved protein                                         |
| arCOG07442 |          |      | S | Uncharacterized conserved protein                                         |
| arCOG07455 |          |      | S | Uncharacterized conserved protein                                         |
| arCOG00729 | COG04113 | -    | V | PIN domain containing protein                                             |
| arCOG03521 | COG01002 | -    | V | Type II restriction enzyme, methylase subunit                             |
| arCOG02218 |          |      | V | RHH/CopG DNA binding protein                                              |
| arCOG00726 | COG04113 | -    | V | PIN domain containing protein                                             |
| arCOG06139 | COG02250 |      | V | HEPN domain containing protein                                            |
| arCOG03769 |          |      | S | Uncharacterized conserved membrane protein                                |
| arCOG00865 | COG01156 | NtpB | C | Archaeal/vacuolar-type H <sup>+</sup> -ATPase subunit B                   |
| arCOG00868 | COG01155 | NtpA | C | Archaeal/vacuolar-type H <sup>+</sup> -ATPase subunit A                   |
| arCOG02455 | COG00636 | AtpK | C | Archaeal/vacuolar-type Na <sup>+</sup> /H <sup>+</sup> -ATPase, subunit K |
| arCOG04101 | COG01394 | NtpD | C | Archaeal/vacuolar-type H <sup>+</sup> -ATPase subunit D                   |
| arCOG04138 | COG01269 | NtpI | C | Archaeal/vacuolar-type H <sup>+</sup> -ATPase subunit I                   |
| arCOG01356 | COG01032 | -    | C | Radical SAM superfamily enzyme                                            |
| arCOG02146 | COG02033 | -    | C | Desulfoferredoxin                                                         |
| arCOG04247 | COG02317 | -    | E | Zn-dependent carboxypeptidase                                             |
| arCOG00245 | COG00287 | TyrA | E | Prephenate dehydrogenase                                                  |
| arCOG01352 | COG00334 | GdhA | E | Glutamate dehydrogenase/leucine dehydrogenase                             |
| arCOG02098 | COG01605 | PheA | E | Chorismate mutase                                                         |

**Loss in Nst1**

|            |          |         |   |                                                                                   |
|------------|----------|---------|---|-----------------------------------------------------------------------------------|
| arCOG02297 | COG00115 | IlvE    | E | Branched-chain amino acid aminotransferase/4-amino-4-deoxychorismate lyase        |
| arCOG01883 | COG01351 | THY1    | F | Thymidylate synthase                                                              |
| arCOG04889 | COG01328 | NrdD    | F | Oxygen-sensitive ribonucleoside-triphosphate reductase                            |
| arCOG07813 |          |         | G | Glycosyl hydrolases family 43                                                     |
| arCOG00972 | COG01056 | NadR    | H | Nicotinamide mononucleotide adenyltransferase                                     |
| arCOG01259 | COG01028 | FabG    | I | Short-chain alcohol dehydrogenase                                                 |
| arCOG01717 | COG00154 | GatA    | J | Asp-tRNAAsn/Glu-tRNA <sup>Gln</sup> amidotransferase A subunit or related amidase |
| arCOG00910 | COG02263 | -       | J | Predicted RNA methylase                                                           |
| arCOG00993 | COG01374 | NIP7    | J | Protein involved in ribosomal biogenesis, contains PUA domain                     |
| arCOG01346 | COG01534 | -       | J | Predicted RNA-binding protein containing KH domain, possibly ribosomal protein    |
| arCOG01718 | COG00064 | GatB    | J | Asp-tRNAAsn/Glu-tRNA <sup>Gln</sup> amidotransferase B subunit                    |
| arCOG02726 | COG00721 | GatC    | J | Asp-tRNAAsn/Glu-tRNA <sup>Gln</sup> amidotransferase C subunit                    |
| arCOG04108 | COG02051 | RPS27A  | J | Ribosomal protein S27E                                                            |
| arCOG04154 | COG02007 | RPS8A   | J | Ribosomal protein S8E                                                             |
| arCOG04209 | COG01632 | RPL15A  | J | Ribosomal protein L15E                                                            |
| arCOG04240 | COG00100 | RpsK    | J | Ribosomal protein S11                                                             |
| arCOG04277 | COG00231 | Efp     | J | Translation elongation factor P (EF-P)/translation initiation factor 5A (eIF-5A)  |
| arCOG00485 | COG01384 | LysS    | J | Lysyl-tRNA synthetase (class I)                                                   |
| arCOG00990 | COG01549 | -       | J | Queuine tRNA-ribosyltransferase, contain PUA domain                               |
| arCOG01117 | COG01522 | Lrp     | K | Lrp/AsnC family C-terminal domain                                                 |
| arCOG02242 | COG03355 | -       | K | Transcriptional regulator, contains HTH domain                                    |
| arCOG00998 | COG01958 | LSM1    | K | Small nuclear ribonucleoprotein (snRNP) homolog                                   |
| arCOG01760 | COG00195 | NusA    | K | Transcription elongation factor                                                   |
| arCOG04479 | COG03357 | -       | K | Predicted transcriptional regulator containing an HTH domain fused to a Zn-ribbon |
| arCOG02724 | COG00350 | Ada     | L | Methylated DNA-protein cysteine methyltransferase                                 |
| arCOG00463 | COG01833 | -       | L | Uri superfamily endonuclease                                                      |
| arCOG00929 | COG01515 | Nfi     | L | Deoxyinosine 3'endonuclease (endonuclease V)                                      |
| arCOG00047 | COG01041 | -       | L | Predicted DNA modification methylase                                              |
| arCOG00415 | COG00468 | RecA    | L | RecA/RadA recombinase                                                             |
| arCOG00459 | COG00177 | Nth     | L | EndoIII-related endonuclease                                                      |
| arCOG03192 | COG01525 | -       | L | Micrococcal nuclease (thermonuclease)                                             |
| arCOG01568 | COG00668 | MscS    | M | Small-conductance mechanosensitive channel                                        |
| arCOG01403 | COG00438 | RfaG    | M | Glycosyltransferase                                                               |
| arCOG01381 | COG00463 | WcaA    | M | Glycosyltransferase                                                               |
| arCOG01811 | COG02064 | TadC    | N | Flp pilus assembly protein TadC                                                   |
| arCOG01812 | COG02064 | TadC    | N | Flp pilus assembly protein TadC                                                   |
| arCOG00946 | COG01180 | PflA    | O | Pyruvate-formate lyase-activating enzyme                                          |
| arCOG01306 | COG01222 | RPT1    | O | ATP-dependent 26S proteasome regulatory subunit                                   |
| arCOG00952 | COG01180 | PflA    | O | Pyruvate-formate lyase-activating enzyme                                          |
| arCOG01311 | COG00616 | SppA    | O | Periplasmic serine protease (ClpP class)                                          |
| arCOG04236 | COG00396 | sufC    | O | Cysteine desulfurase activator ATPase                                             |
| arCOG02881 | COG00530 | ECM27   | P | Ca <sup>2+</sup> /Na <sup>+</sup> antiporter                                      |
| arCOG02265 | COG00598 | CorA    | P | Mg <sup>2+</sup> and Co <sup>2+</sup> transporter                                 |
| arCOG04430 | COG01078 | -       | R | HD superfamily phosphohydrolase                                                   |
| arCOG00497 | COG02220 | -       | R | Zn-dependent hydrolase of the beta-lactamase fold                                 |
| arCOG00458 | COG01913 | -       | R | Predicted Zn-dependent protease                                                   |
| arCOG00614 | COG01994 | SpoIVFB | R | Zn-dependent protease                                                             |
| arCOG00434 | COG00714 | -       | R | MoxR-like ATPase                                                                  |
| arCOG00499 | COG01235 | PhnP    | R | Metal-dependent hydrolase of the beta-lactamase superfamily                       |
| arCOG00938 | COG00535 | -       | R | Radical SAM superfamily enzyme                                                    |



|            |          |         |   |                                                                                         |
|------------|----------|---------|---|-----------------------------------------------------------------------------------------|
| arCOG01360 | COG01244 | -       | R | MiaB family, Radical SAM enzyme                                                         |
| arCOG02292 | COG00546 | Gph     | R | HAD superfamily hydrolase<br>Predicted permease, member of the PurR regulon             |
| arCOG02642 | COG00628 | yhhT    | R | Uncharacterized conserved protein, DUF58 family, contains vWF domain                    |
| arCOG02742 | COG01721 | -       | R | Predicted surface protease of transglutaminase family                                   |
| arCOG03450 |          |         | R | Uncharacterized conserved protein                                                       |
| arCOG01336 | COG02078 | AMMECR1 | S | Predicted membrane protein                                                              |
| arCOG02177 | COG01967 | -       | S | Predicted membrane protein                                                              |
| arCOG04469 | COG01784 | -       | S | RIO-like serine/threonine protein kinase fused to N-terminal HTH domain                 |
| arCOG01181 | COG00478 | -       | T | Predicted nucleic acid-binding protein, consists of a PIN domain and a Zn-ribbon module |
| arCOG00721 | COG01439 | -       | V | ABC-type antimicrobial peptide transport system, ATPase component                       |
| arCOG00922 | COG01136 | SalX    | V | CRISPR-associated protein Cas1                                                          |
| arCOG01452 | COG01518 | Cas1    | V | ABC-type antimicrobial peptide transport system, permease component                     |
| arCOG02312 | COG00577 | SalY    | V | CRISPR-associated protein Cas4, RecB family exonuclease                                 |
| arCOG00794 | COG01468 | Cas4    | V | CRISPR system related protein Cas7, RAMP superfamily                                    |
| arCOG03617 | COG01857 | Cas7    | V | CRISPR-associated protein Cas2                                                          |
| arCOG04194 | COG01343 | Cas2    | V |                                                                                         |

#### Gain in *N.equitans*

|            |          |       |   |                                                                                                          |
|------------|----------|-------|---|----------------------------------------------------------------------------------------------------------|
| arCOG02200 | COG01018 | Hmp   | C | Flavodoxin reductase (ferredoxin-NADPH reductase) family 1                                               |
| arCOG00072 | COG00175 | CysH  | E | 3'-phosphoadenosine 5'-phosphosulfate sulfotransferase (PAPS reductase)/FAD synthetase or related enzyme |
| arCOG04322 | COG00260 | PepB  | E | Leucyl aminopeptidase                                                                                    |
| arCOG00014 | COG00524 | RbsK  | G | Sugar kinase, ribokinase family                                                                          |
| arCOG00877 | COG01061 | SSL2  | K | DNA or RNA helicase of superfamily II                                                                    |
| arCOG06583 | COG00648 | Nfo   | L | Endonuclease IV                                                                                          |
| arCOG00331 | COG00417 | PolB  | L | DNA polymerase elongation subunit (family B), C-terminal domain                                          |
| arCOG01188 | COG02192 | -     | O | Predicted carbamoyl transferase, NodU family                                                             |
| arCOG01716 | COG00719 | sufB  | O | Cysteine desulfurase activator SufB                                                                      |
| arCOG02404 | COG00785 | CcdA  | O | Cytochrome c biogenesis protein                                                                          |
| arCOG04355 | COG01275 | TehA  | P | Tellurite resistance protein or related permease                                                         |
| arCOG09607 | COG02761 | FrnE  | Q | Predicted dithiol-disulfide isomerase involved in polyketide biosynthesis                                |
| arCOG01065 | COG00446 | HcaD  | R | NAD(FAD)-dependent dehydrogenase                                                                         |
| arCOG01378 | COG01524 | -     | R | Uncharacterized protein of the AP superfamily                                                            |
| arCOG00626 | COG01253 | TlyC  | R | Hemolysins or related protein containing CBS domains                                                     |
| arCOG04065 | COG00612 | PqqL  | R | Predicted Zn-dependent peptidase                                                                         |
| arCOG00428 | COG00608 | Cdc45 | S | Protein similar to exonuclease RecJ central domain                                                       |
| arCOG02737 | COG01433 | -     | S | NifX family protein                                                                                      |
| arCOG03648 |          |       | S | Uncharacterized conserved protein                                                                        |
| arCOG05748 |          |       | S | Uncharacterized conserved protein                                                                        |
| arCOG06945 |          |       | S | Uncharacterized conserved protein                                                                        |
| arCOG09421 |          |       | S | Uncharacterized conserved protein                                                                        |
| arCOG01445 | COG01203 | Cas3  | V | CRISPR-associated helicase Cas3                                                                          |
| arCOG02758 | COG01688 | Cas5  | V | CRISPR system related protein Cas5, RAMP superfamily                                                     |
| arCOG04342 | COG01583 | -     | V | CRISPR system related protein, RAMP superfamily                                                          |

#### Loss in *N.equitans*

|            |          |      |   |                                                   |
|------------|----------|------|---|---------------------------------------------------|
| arCOG01340 | COG01042 | -    | C | Acyl-CoA synthetase (NDP forming)                 |
| arCOG01338 | COG01042 | -    | C | Acyl-CoA synthetase, ATP-grasp containing subunit |
| arCOG00288 | COG00778 | NfnB | C | Nitroreductase                                    |

|            |          |            |   |                                                                                                                |
|------------|----------|------------|---|----------------------------------------------------------------------------------------------------------------|
| arCOG01252 | COG01012 | PutA       | C | Lactaldehyde dehydrogenase, Succinate semialdehyde dehydrogenase or other NAD-dependent aldehyde dehydrogenase |
| arCOG01599 | COG01013 | PorB       | C | Pyruvate:ferredoxin oxidoreductase or related 2-oxoacid:ferredoxin oxidoreductase, beta subunit                |
| arCOG01606 | COG00674 | PorA       | C | Pyruvate:ferredoxin oxidoreductase or related 2-oxoacid:ferredoxin oxidoreductase, alpha subunit and gamma     |
| arCOG01674 | COG01254 | AcyP       | C | Acylphosphatase                                                                                                |
| arCOG00371 | COG01196 | Smc        | D | Chromosome segregation ATPase                                                                                  |
| arCOG02097 | COG00710 | AroD       | E | 3-dehydroquinate dehydratase                                                                                   |
| arCOG02969 | COG00308 | PepN       | E | Aminopeptidase N                                                                                               |
| arCOG04276 | COG00209 | NrdA       | F | Ribonucleotide reductase, alpha subunit                                                                        |
| arCOG01891 | COG00125 | Tmk        | F | Thymidylate kinase                                                                                             |
| arCOG03714 | COG01328 | NrdD       | F | ATP cone domain                                                                                                |
| arCOG01696 | COG03635 | -          | G | 2,3-bisphosphoglycerate-independent phosphoglycerate mutase                                                    |
| arCOG00144 | COG00477 | ProP       | G | Permease of the major facilitator superfamily                                                                  |
| arCOG01421 | COG00058 | GlgP       | G | Glucan phosphorylase                                                                                           |
| arCOG03278 | COG01449 | -          | G | Glycosyl hydrolase family 57                                                                                   |
| arCOG00132 | COG00477 | ProP       | G | Permease of the major facilitator superfamily                                                                  |
| arCOG00767 | COG01109 | {ManB}     | G | Phosphomannomutase                                                                                             |
| arCOG01087 | COG00149 | TpiA       | G | Triosephosphate isomerase                                                                                      |
| arCOG01169 | COG00148 | Eno        | G | Enolase                                                                                                        |
| arCOG04180 | COG01980 | -          | G | Bifunctional fructose-1,6-bisphosphate aldolase/phosphatase FBPA/FBPase                                        |
| arCOG01895 | COG01082 | IolE       | G | Sugar phosphate isomerase/epimerase                                                                            |
| arCOG04120 | COG00469 | PykF       | G | Pyruvate kinase                                                                                                |
| arCOG01589 | COG00189 | RimK       | H | Glutathione synthase/glutaminyl transferase/alpha-L-glutamate ligase                                           |
| arCOG01978 | COG00294 | FolP       | H | Dihydropteroate synthase or related enzyme                                                                     |
| arCOG04761 | COG01968 | UppP       | I | Undecaprenyl pyrophosphate phosphatase                                                                         |
| arCOG03056 | COG00671 | PgpB       | I | Membrane-associated phospholipid phosphatase                                                                   |
| arCOG01365 | COG01369 | POP5       | J | RNase P/RNase MRP subunit POP5                                                                                 |
| arCOG00784 | COG01588 | POP4       | J | RNase P/RNase MRP subunit p29                                                                                  |
| arCOG04345 | COG02023 | RPR2       | J | RNase P subunit RPR2                                                                                           |
| arCOG00307 | COG01603 | RPP1       | J | RNase P/RNase MRP subunit p30                                                                                  |
| arCOG00407 | COG00017 | AsnS       | J | Aspartyl/asparaginyl-tRNA synthetase                                                                           |
| arCOG00409 | COG00017 | AsnS       | J | Aspartyl/asparaginyl-tRNA synthetase                                                                           |
| arCOG01239 | COG01901 | RsmE       | J | RNA base methyltransferase family enzyme                                                                       |
| arCOG04332 | COG02606 | Ybak       | J | Cys-tRNA(Pro)/Cys-tRNA(Cys) deacylase, ybaK family                                                             |
| arCOG01663 | COG02026 | RelE       | K | Cytotoxic translational repressor of toxin-antitoxin stability system                                          |
| arCOG00367 | COG01630 | -          | L | NurA 5'-3' nuclease                                                                                            |
| arCOG00417 | COG00468 | RecA       | L | RecA/RadA recombinase                                                                                          |
| arCOG00427 | COG00608 | RecJ/Cdc45 | L | Single-stranded DNA-specific exonuclease                                                                       |
| arCOG01241 | COG00582 | XerC       | L | RecJ                                                                                                           |
| arCOG05276 |          |            | L | Integrase                                                                                                      |
| arCOG00472 | COG01474 |            | L | Pyrimidine dimer DNA glycosylase, T4 endoV family                                                              |
| arCOG01486 | COG01658 | -          | L | orc1/cdc6 family replication initiation protein fused to HTH domain                                            |
| arCOG03158 | COG01372 | -          | L | Ribonuclease M5 (contains TOPRIM domain)                                                                       |
| arCOG01411 | COG00438 | RfaG       | M | Intein/homing endonuclease                                                                                     |
| arCOG01389 | COG01215 | -          | M | Glycosyltransferase                                                                                            |
| arCOG01367 | COG01091 | RfbD       | M | Glycosyltransferase                                                                                            |
| arCOG04188 | COG01898 | RfbC       | M | dTDP-4-dehydrorhamnose reductase                                                                               |
| arCOG00894 | COG00463 | WcaA       | M | dTDP-4-dehydrorhamnose 3,5-epimerase or related enzyme                                                         |
| arCOG01410 | COG00438 | RfaG       | M | Glycosyltransferase                                                                                            |
| arCOG01808 | COG02064 | TadC       | N | Glycosyltransferase                                                                                            |
| arCOG01829 | COG01681 | FlaB       | N | Flp pilus assembly protein TadC                                                                                |
| arCOG01809 | COG01955 | FlaJ       | N | Archaeal flagellins                                                                                            |
| arCOG01822 | COG03354 | FlaG       | N | Archaeal flagella assembly protein J                                                                           |
|            |          |            | N | Putative archaeal flagellar protein G                                                                          |

|            |          |       |   |                                                                                                                 |
|------------|----------|-------|---|-----------------------------------------------------------------------------------------------------------------|
| arCOG01824 | COG03353 | FlaF  | N | Putative archaeal flagellar protein F                                                                           |
| arCOG04148 | COG02874 | FlaH  | N | Predicted ATPase involved in biogenesis of archaeal flagella                                                    |
| arCOG01715 | COG00719 | sufB  | O | Cysteine desulfurase activator SufB                                                                             |
| arCOG00561 | COG04346 | -     | O | Predicted membrane-bound dolichyl-phosphate-mannose-protein mannosyltransferase                                 |
| arCOG01915 | COG00330 | HflC  | O | Membrane protease subunit, stomatin/prohibitin homolog                                                          |
| arCOG03580 | COG02020 | STE14 | O | Putative protein-S-isoprenylcysteine methyltransferase                                                          |
| arCOG01578 | COG00474 | MgtA  | P | Cation transport ATPase                                                                                         |
| arCOG04147 | COG00605 | SodA  | P | Superoxide dismutase                                                                                            |
| arCOG04231 | COG01324 | CutA  | P | Uncharacterized protein involved in tolerance to divalent cations                                               |
| arCOG01943 | COG01335 | PncA  | Q | Amidase related to nicotinamidase                                                                               |
| arCOG03167 | COG01373 | -     | R | Predicted ATPase (AAA+ superfamily)                                                                             |
| arCOG00555 | COG01205 | -     | R | Distinct helicase family with a unique C-terminal domain including a metal-binding cysteine cluster             |
| arCOG02050 | COG00730 | -     | R | Predicted permease                                                                                              |
| arCOG01254 | COG02872 | -     | R | Predicted metal-dependent hydrolase related to alanyl-tRNA synthetase HxxxH domain and second additional domain |
| arCOG01263 | COG00300 | DltE  | R | Short-chain dehydrogenase                                                                                       |
| arCOG02293 | COG00637 | -     | R | HAD superfamily hydrolase                                                                                       |
| arCOG04069 | COG02106 | -     | R | RNA methyltransferase, SPOUT superfamily                                                                        |
| arCOG04409 | COG02410 | -     | R | Predicted nuclease (RNase H fold)                                                                               |
| arCOG00032 | COG01092 | -     | R | SAM-dependent methyltransferase fused to PUA domain                                                             |
| arCOG00348 | COG02047 | -     | R | Archaeal enzyme of ATP-grasp superfamily                                                                        |
| arCOG01205 | COG01708 | -     | R | Minimal nucleotidyltransferase                                                                                  |
| arCOG01641 | COG03269 | -     | R | Predicted RNA-binding protein, contains TRAM domain                                                             |
| arCOG03166 | COG01672 | -     | R | AAA+ superfamily ATPase fused to HTH nad                                                                        |
| arCOG03168 | COG01373 | -     | R | RecB nuclease domains                                                                                           |
| arCOG04253 | COG01415 | -     | S | Predicted ATPase (AAA+ superfamily)                                                                             |
| arCOG04269 | COG01602 | -     | S | Uncharacterized conserved protein                                                                               |
| arCOG04291 | COG01801 | -     | S | Uncharacterized conserved protein                                                                               |
| arCOG01224 | COG01849 | -     | S | Uncharacterized conserved protein                                                                               |
| arCOG02228 | COG02246 | -     | S | Predicted membrane protein                                                                                      |
| arCOG04051 | COG02412 | -     | S | Uncharacterized conserved protein                                                                               |
| arCOG04171 | COG02090 | -     | S | Uncharacterized conserved protein                                                                               |
| arCOG00385 | COG01895 | -     | S | Uncharacterized conserved protein                                                                               |
| arCOG02123 | COG03420 | -     | S | HEPN domain containing protein                                                                                  |
| arCOG02499 | COG03420 | -     | S | NosD-like periplasmic protein                                                                                   |
| arCOG03881 | COG02095 | MarC  | S | Uncharacterized conserved protein                                                                               |
| arCOG01997 | COG02095 | MarC  | U | Multiple antibiotic transporter                                                                                 |
| arCOG02673 | COG01422 | -     | U | OxaA/SpoJ/YigC translocase/secretase, sec-independent integration of nascent membrane proteins into membrane    |
| arCOG00196 | COG01131 | CcmA  | V | ABC-type multidrug transport system, ATPase component                                                           |
| arCOG01191 | COG02250 | -     | V | HEPN domain containing protein                                                                                  |
| arCOG01467 | COG00842 | -     | V | ABC-type multidrug transport system, permease component                                                         |
| arCOG02841 | COG01132 | MdlB  | V | ABC-type multidrug transport system, ATPase and permease component                                              |
| arCOG00340 | COG00277 | GlcD  | C | FAD/FMN-containing dehydrogenase fused to Heterodisulfide reductase, subunit B                                  |
| arCOG00342 | COG02048 | HdrB  | C | Heterodisulfide reductase, subunit B                                                                            |
| arCOG00343 | COG00247 | GlpC  | C | Fe-S oxidoreductase                                                                                             |
| arCOG00345 | COG00277 | GlcD  | C | FAD/FMN-containing dehydrogenase                                                                                |
| arCOG00965 | COG01150 | HdrC  | C | Heterodisulfide reductase, subunit C                                                                            |
| arCOG00966 | COG01150 | HdrC  | C | Heterodisulfide reductase, subunit C                                                                            |
| arCOG01456 | COG01062 | AdhC  | C | Zn-dependent alcohol dehydrogenase                                                                              |
| arCOG01496 | COG00243 | BisC  | C | Molybdopterin oxidoreductase, contains molybdopterin-binding domain                                             |

**Gain in Acd1 and other Sulfolobales**

|            |          |          |   |                                                                                                                                    |
|------------|----------|----------|---|------------------------------------------------------------------------------------------------------------------------------------|
| arCOG01928 | COG03427 | -        | C | Carbon monoxide dehydrogenase subunit G, CoxG                                                                                      |
| arCOG03626 | COG04237 | HyfE     | C | Hydrogenase 4 membrane component (E)                                                                                               |
| arCOG03696 | COG00348 | NapH     | C | Polyferredoxin                                                                                                                     |
| arCOG04548 | COG01146 | -        | C | Ferredoxin                                                                                                                         |
| arCOG05375 |          |          | C | Archaeal succinate dehydrogenase subunit D                                                                                         |
| arCOG05891 |          |          | C | Terminal oxidase, subunit doxC                                                                                                     |
| arCOG05892 |          |          | C | Terminal oxidase, subunit doxE                                                                                                     |
| arCOG05916 |          |          | C | Predicted heterodisulfide reductase subunit                                                                                        |
| arCOG06015 |          |          | C | Cytochrome b558/566, subunit A                                                                                                     |
| arCOG06016 |          |          | C | Cytochrome b558/566, subunit B                                                                                                     |
| arCOG02234 | COG01148 | HdrA     | C | Heterodisulfide reductase, subunit A, polyferredoxin                                                                               |
| arCOG07285 |          | NtpF     | C | Archaeal/vacuolar-type H <sup>+</sup> -ATPase subunit H                                                                            |
| arCOG00454 | COG05491 | ESCRTIII | D | Crenarchaeal division protein ESCRT-III                                                                                            |
| arCOG00758 | COG00665 | DadA     | E | Glycine/D-amino acid oxidase (deaminating) Acetylornithine deacetylase/Succinyl-diaminopimelate desuccinylase or related deacylase |
| arCOG01110 | COG00624 | ArgE     | E | Amino acid transporter                                                                                                             |
| arCOG03465 | COG00531 | PotE     | E | Amino acid transporter                                                                                                             |
| arCOG03652 | COG00531 | PotE     | E | Amino acid transporter                                                                                                             |
| arCOG03657 | COG00028 |          | E | Acetolactate synthase large subunit or other thiamine pyrophosphate-requiring enzyme                                               |
| arCOG03670 |          |          | E | Thermopsin-like protease                                                                                                           |
| arCOG03674 |          |          | E | Thermopsin-like protease                                                                                                           |
| arCOG05937 | COG00028 | IlvB     | E | Acetolactate synthase large subunit or other thiamine pyrophosphate-requiring enzyme                                               |
| arCOG05991 |          |          | E | ACT domain                                                                                                                         |
| arCOG01597 | COG00026 | PurK     | F | Phosphoribosylaminoimidazole carboxylase (NCAIR synthetase)                                                                        |
| arCOG03658 | COG00208 | NrdF     | F | Ribonucleotide reductase, beta subunit                                                                                             |
| arCOG03713 | COG00209 | NrdA     | F | Ribonucleotide reductase associated ATP-cone domain                                                                                |
| arCOG04558 | COG01957 | URH1     | F | Inosine-uridine nucleoside N-ribohydrolase                                                                                         |
| arCOG05138 | COG00248 | GppA     | F | Exopolyphosphatase                                                                                                                 |
| arCOG02683 | COG00477 | ProP     | G | Permease of the major facilitator superfamily                                                                                      |
| arCOG02687 | COG00477 | ProP     | G | Permease of the major facilitator superfamily                                                                                      |
| arCOG02689 | COG00477 | ProP     | G | Permease of the major facilitator superfamily                                                                                      |
| arCOG03287 | COG03408 | GDB1     | G | Glycogen debranching enzyme                                                                                                        |
| arCOG05705 | COG03839 | MalK     | G | ABC-type sugar transport system, ATPase component                                                                                  |
| arCOG05971 | COG00477 |          | G | MFS family permease                                                                                                                |
| arCOG00572 | COG00029 | NadB     | H | Aspartate oxidase                                                                                                                  |
| arCOG00645 | COG02875 | CobM     | H | Precorrin-4 methylase                                                                                                              |
| arCOG00647 | COG01010 | CobJ     | H | Precorrin-3B methylase                                                                                                             |
| arCOG00648 | COG02243 | CobF     | H | Precorrin-2 methylase                                                                                                              |
| arCOG00651 | COG02073 | CbiG     | H | Cobalamin biosynthesis protein CbiG                                                                                                |
| arCOG00652 | COG02073 | CbiG     | H | Cobalamin biosynthesis protein CbiG                                                                                                |
| arCOG00977 | COG02242 | CobL     | H | Precorrin-6B methylase 2                                                                                                           |
| arCOG02247 | COG02082 | CobH     | H | Precorrin isomerase                                                                                                                |
| arCOG04383 | COG01903 | CbiD     | H | Cobalamin biosynthesis protein CbiD                                                                                                |
| arCOG05973 | COG02226 | UbiE     | H | Methylase involved in ubiquinone/menaquinone biosynthesis                                                                          |
| arCOG00251 | COG01250 | FadB     | I | 3-hydroxyacyl-CoA dehydrogenase                                                                                                    |
| arCOG01032 | COG03890 | ERG8     | I | Phosphomevalonate kinase                                                                                                           |
| arCOG02937 | COG03407 | MVD1     | I | Mevalonate pyrophosphate decarboxylase                                                                                             |
| arCOG01702 | COG01676 | SEN2     | J | tRNA splicing endonuclease                                                                                                         |
| arCOG07849 |          |          | J | Ribosome associated protein L45a                                                                                                   |
| arCOG00817 | COG02002 | AbrB     | K | Transcriptional regulator AbrB                                                                                                     |
| arCOG01010 | COG02161 | StbD     | K | Antitoxin (DNA-binding domain) of toxin-antitoxin stability system                                                                 |
| arCOG03737 |          |          | K | Transcriptional regulator of GntR family                                                                                           |
| arCOG04480 | COG02002 | AbrB     | K | Transcriptional regulator AbrB                                                                                                     |
| arCOG05938 |          | Rpo13    | K | DNA-directed RNA polymerase subunit 13                                                                                             |

|            |          |        |   |                                                                                  |
|------------|----------|--------|---|----------------------------------------------------------------------------------|
| arCOG05961 | COG01321 | TroR   | K | Mn-dependent transcriptional regulator (DtxR family)                             |
| arCOG07936 | COG04742 | -      | K | HTH containing transcriptional regulator                                         |
| arCOG00283 | COG00433 | -      | L | HerA helicase                                                                    |
| arCOG00461 | COG02231 | -      | L | Uncharacterized protein related to Endonuclease III                              |
| arCOG02134 | COG03316 | -      | L | Transposase                                                                      |
| arCOG02207 | COG00708 | XthA   | L | Exonuclease III                                                                  |
| arCOG04357 | COG01059 | -      | L | Thermostable 8-oxoguanine DNA glycosylase                                        |
| arCOG05888 |          |        | L | Chromosomal protein Sac7d/Sso7d                                                  |
| arCOG05927 |          |        | L | NurA family nuclease                                                             |
| arCOG00664 | COG01209 | RfbA   | M | dTDP-glucose pyrophosphorylase                                                   |
| arCOG01397 | COG00463 | WcaA   | M | Glycosyltransferase                                                              |
| arCOG04762 | COG00451 | WcaG   | M | Nucleoside-diphosphate-sugar epimerase                                           |
| arCOG05943 | COG00463 | WcaA   | M | Glycosyltransferase                                                              |
| arCOG05986 |          |        | N | Predicted component of pili system                                               |
| arCOG07276 |          |        | N | Pilin/Flagellin                                                                  |
| arCOG00637 | COG01973 | HypE   | O | Hydrogenase maturation factor                                                    |
| arCOG02072 | COG00425 | SirA   | O | Predicted redox protein, regulator of disulfide bond formation                   |
| arCOG03202 | COG00826 | -      | O | Collagenase family protease                                                      |
| arCOG03665 | COG04934 | -      | O | Subtilase family protease                                                        |
| arCOG06207 | COG03526 | -      | O | Rdx family selenoprotein                                                         |
| arCOG02246 | COG02138 | -      | P | Sirohydrochlorin ferrochelatase                                                  |
| arCOG02853 | COG02146 | {NirD} | P | Ferredoxin subunit of nitrite reductase or ring-hydroxylating dioxygenase        |
| arCOG02860 | COG00288 | CynT   | P | Carbonic anhydrase                                                               |
| arCOG06003 | COG00226 | PstS   | P | ABC-type phosphate transport system, periplasmic component                       |
| arCOG06023 | COG03376 | HoxN   | P | High-affinity nickel permease                                                    |
| arCOG01776 | COG00500 |        | Q | SAM-dependent methyltransferase                                                  |
| arCOG02869 | COG02761 | FrnE   | Q | Predicted dithiol-disulfide isomerase                                            |
| arCOG03000 | COG03435 | -      | Q | involved in polyketide biosynthesis                                              |
| arCOG06004 | COG03971 |        | Q | Genitase 1,2-dioxygenase                                                         |
| arCOG07335 | COG00500 |        | Q | 2-keto-4-pentenoate hydratase                                                    |
| arCOG00326 | COG00123 | AcuC   | R | SAM-dependent methyltransferase                                                  |
| arCOG00945 | COG00641 | AslB   | R | Deacetylase, including yeast histone deacetylase and acetoin utilization protein |
| arCOG01154 | COG04186 | -      | R | Radical SAM superfamily enzyme                                                   |
| arCOG01189 | COG00661 | AarF   | R | Calcineurin-like phosphoesterase superfamily protein                             |
| arCOG01457 | COG01064 | AdhP   | R | Predicted unusual protein kinase                                                 |
| arCOG01505 | COG03381 | TorD   | R | D-arabinose 1-dehydrogenase or another Zn-dependent alcohol dehydrogenase        |
| arCOG01991 | COG00406 | phoE   | R | Uncharacterized component of anaerobic dehydrogenase                             |
| arCOG02066 | COG02044 | -      | R | Broad specificity phosphatase PhoE or related phosphatase                        |
| arCOG02067 | COG02044 | -      | R | Predicted peroxiredoxin                                                          |
| arCOG03038 | COG00457 | NrfG   | R | Predicted peroxiredoxin                                                          |
| arCOG03233 | COG04938 | -      | R | TPR repeats containing protein                                                   |
| arCOG03428 | COG00457 | NrfG   | R | Predicted ATPase                                                                 |
| arCOG03738 |          |        | R | TPR repeats containing protein                                                   |
| arCOG03844 |          |        | R | P-loop NTPase superfamily protein                                                |
| arCOG05348 | COG00446 | HcaD   | R | TlpA/TrxA-like family protein                                                    |
| arCOG05403 | COG02329 | -      | R | NAD(FAD)-dependent dehydrogenase                                                 |
| arCOG05919 | COG00546 | Gph    | R | Uncharacterized enzyme involved in biosynthesis of extracellular polysaccharides |
| arCOG05932 | COG00491 | GloB   | R | HAD superfamily hydrolase                                                        |
| arCOG05933 |          |        | R | Zn-dependent hydrolase, glyoxylase family                                        |
| arCOG05959 | COG00622 |        | R | Rossmann-fold NAD(P)(+)-binding protein                                          |
| arCOG05985 | COG02107 |        | R | Predicted ICC-like phosphoesterase                                               |
| arCOG06001 | COG03889 |        | R | Predicted periplasmic solute-binding protein                                     |
| arCOG06026 | COG01011 |        | R | Predicted periplasmic protein                                                    |
| arCOG07183 | COG02244 | RfbX   | R | HAD superfamily hydrolase                                                        |
| arCOG07273 |          |        | R | Polysaccharide biosynthesis protein, Mvin family                                 |
| arCOG07852 |          |        | R | Predicted periplasmic protein                                                    |
|            |          |        | R | Predicted regulatory ATPase                                                      |

|            |          |   |   |                                             |
|------------|----------|---|---|---------------------------------------------|
| arCOG01098 |          |   | S | Uncharacterized conserved protein           |
| arCOG01106 |          |   | S | Uncharacterized conserved protein           |
| arCOG01212 |          |   | S | Uncharacterized conserved protein           |
| arCOG01669 | COG03370 | - | S | Uncharacterized conserved protein           |
| arCOG01714 | COG05440 | - | S | Uncharacterized conserved protein           |
| arCOG02114 | COG02427 | - | S | Uncharacterized conserved protein           |
| arCOG02115 | COG02427 | - | S | Uncharacterized conserved protein           |
| arCOG02738 | COG01433 | - | S | NifX family protein                         |
| arCOG02979 |          |   | S | Uncharacterized conserved protein           |
| arCOG03692 |          |   | S | Uncharacterized conserved protein           |
| arCOG03699 |          |   | S | Uncharacterized conserved protein           |
| arCOG03778 |          |   | S | Uncharacterized conserved protein           |
| arCOG03851 |          |   | S | Uncharacterized conserved protein           |
| arCOG03852 |          |   | S | Uncharacterized conserved protein           |
| arCOG03853 |          |   | S | Uncharacterized conserved protein           |
| arCOG03854 |          |   | S | Uncharacterized conserved protein           |
| arCOG03855 |          |   | S | Uncharacterized conserved protein           |
| arCOG03861 |          |   | S | Uncharacterized conserved protein           |
| arCOG03869 |          |   | S | Uncharacterized conserved protein           |
| arCOG04886 |          |   | S | Uncharacterized conserved protein           |
| arCOG05323 |          |   | S | Uncharacterized conserved protein           |
| arCOG05380 | COG02149 | - | S | Predicted membrane protein                  |
|            |          |   |   | Uncharacterized conserved protein, contains |
| arCOG05495 | COG04911 | - | S | N-terminal coiled-coil domain               |
| arCOG05546 |          |   | S | Uncharacterized conserved protein           |
| arCOG05883 |          |   | S | Uncharacterized conserved protein           |
| arCOG05884 |          |   | S | Uncharacterized conserved protein           |
| arCOG05885 |          |   | S | Uncharacterized conserved protein           |
| arCOG05886 |          |   | S | Uncharacterized conserved protein           |
| arCOG05894 |          |   | S | Uncharacterized conserved protein           |
| arCOG05895 | COG02427 | - | S | Uncharacterized conserved protein           |
| arCOG05897 |          |   | S | Uncharacterized conserved protein           |
| arCOG05898 |          |   | S | Uncharacterized conserved protein           |
| arCOG05899 |          |   | S | Cell surface protein                        |
|            |          |   |   | Uncharacterized conserved membrane          |
| arCOG05903 |          |   | S | protein                                     |
| arCOG05904 |          |   | S | Uncharacterized conserved protein           |
| arCOG05905 |          |   | S | Uncharacterized conserved protein           |
| arCOG05907 |          |   | S | Uncharacterized conserved protein           |
| arCOG05912 |          |   | S | Uncharacterized conserved protein           |
| arCOG05913 |          |   | S | Uncharacterized conserved protein           |
| arCOG05917 |          |   | S | Uncharacterized conserved protein           |
| arCOG05918 |          |   | S | Uncharacterized conserved protein           |
| arCOG05920 |          |   | S | Uncharacterized conserved protein           |
| arCOG05921 |          |   | S | Uncharacterized conserved protein           |
| arCOG05922 |          |   | S | Uncharacterized conserved protein           |
| arCOG05923 |          |   | S | Uncharacterized conserved protein           |
| arCOG05925 |          |   | S | Uncharacterized conserved protein           |
| arCOG05926 |          |   | S | Uncharacterized conserved protein           |
| arCOG05928 |          |   | S | Uncharacterized conserved protein           |
| arCOG05929 |          |   | S | Uncharacterized conserved protein           |
| arCOG05939 |          |   | S | Uncharacterized conserved protein           |
| arCOG05942 |          |   | S | Uncharacterized conserved protein           |
| arCOG05946 |          |   | S | Uncharacterized conserved protein           |
| arCOG05947 |          |   | S | Uncharacterized conserved protein           |
| arCOG05948 |          |   | S | Uncharacterized conserved protein           |
| arCOG05949 |          |   | S | Uncharacterized conserved protein           |
| arCOG05950 |          |   | S | Uncharacterized conserved protein           |
| arCOG05951 |          |   | S | Uncharacterized conserved protein           |
| arCOG05952 |          |   | S | Uncharacterized conserved protein           |
| arCOG05953 |          |   | S | Uncharacterized conserved protein           |
| arCOG05954 |          |   | S | Uncharacterized conserved protein           |
| arCOG05955 |          |   | S | Uncharacterized conserved protein           |
| arCOG05958 |          |   | S | Uncharacterized conserved protein           |
| arCOG05967 |          |   | S | Uncharacterized conserved protein           |
| arCOG05972 |          |   | S | Uncharacterized conserved protein           |
| arCOG05974 |          |   | S | Uncharacterized conserved protein           |
| arCOG05975 |          |   | S | Uncharacterized conserved protein           |
| arCOG05979 |          |   | S | Uncharacterized conserved protein           |
| arCOG05980 |          |   | S | Uncharacterized conserved protein           |

|            |          |      |   |                                                                |
|------------|----------|------|---|----------------------------------------------------------------|
| arCOG05981 |          |      | S | Uncharacterized conserved protein                              |
| arCOG05983 |          |      | S | Uncharacterized conserved protein                              |
| arCOG05984 |          |      | S | Uncharacterized conserved protein                              |
| arCOG05997 |          |      | S | Uncharacterized conserved protein                              |
| arCOG05998 |          |      | S | Uncharacterized conserved helical repeat protein               |
| arCOG05999 |          |      | S | Uncharacterized conserved protein                              |
| arCOG06000 |          |      | S | Uncharacterized conserved protein                              |
| arCOG06002 |          |      | S | Cell surface protein                                           |
| arCOG06007 |          |      | S | Uncharacterized conserved protein                              |
| arCOG06029 |          |      | S | Uncharacterized conserved protein                              |
| arCOG06032 |          |      | S | Uncharacterized conserved protein                              |
| arCOG06034 |          |      | S | Uncharacterized conserved protein                              |
| arCOG06035 |          |      | S | Uncharacterized conserved protein                              |
| arCOG06038 |          |      | S | Uncharacterized conserved protein, contains thioredoxin domain |
| arCOG06039 |          | SlaA | M | S-layer protein SlaA                                           |
| arCOG06040 |          |      | S | Uncharacterized conserved protein                              |
| arCOG06041 |          |      | S | Uncharacterized conserved protein                              |
| arCOG06046 | COG05592 | -    | S | Hemerythrin HHE cation binding domain containing protein       |
| arCOG06050 | COG03431 | -    | S | Predicted membrane protein                                     |
| arCOG07173 |          |      | S | Uncharacterized conserved protein                              |
| arCOG07174 |          |      | S | Uncharacterized conserved protein                              |
| arCOG07176 |          |      | S | Uncharacterized conserved protein                              |
| arCOG07177 |          |      | S | Uncharacterized conserved protein                              |
| arCOG07180 |          |      | S | Uncharacterized conserved protein                              |
| arCOG07184 |          |      | S | Uncharacterized conserved protein                              |
| arCOG07188 |          |      | S | Uncharacterized conserved protein                              |
| arCOG07194 |          |      | S | Uncharacterized conserved protein                              |
| arCOG07195 |          |      | S | Uncharacterized conserved protein                              |
| arCOG07197 |          |      | S | Uncharacterized conserved protein                              |
| arCOG07210 |          |      | S | Uncharacterized conserved protein                              |
| arCOG07214 |          |      | S | Uncharacterized conserved protein                              |
| arCOG07215 |          |      | S | Uncharacterized conserved protein                              |
| arCOG07217 |          |      | S | Uncharacterized conserved protein                              |
| arCOG07219 |          |      | S | Uncharacterized conserved protein                              |
| arCOG07220 |          |      | S | Uncharacterized conserved protein                              |
| arCOG07225 |          |      | S | Uncharacterized conserved protein                              |
| arCOG07254 | COG05607 | -    | S | Uncharacterized conserved protein                              |
| arCOG07262 |          |      | S | Uncharacterized conserved protein                              |
| arCOG07269 |          |      | S | Uncharacterized conserved protein                              |
| arCOG07271 |          |      | S | Uncharacterized conserved protein                              |
| arCOG07274 |          |      | S | Uncharacterized conserved protein                              |
| arCOG07278 |          |      | S | Uncharacterized conserved membrane protein                     |
| arCOG07283 |          |      | S | Uncharacterized conserved protein                              |
| arCOG07284 |          |      | S | Uncharacterized conserved protein                              |
| arCOG07286 |          |      | S | Uncharacterized conserved protein                              |
| arCOG07287 |          |      | S | Uncharacterized conserved protein                              |
| arCOG07296 |          |      | S | Uncharacterized conserved protein                              |
| arCOG07305 |          |      | S | Uncharacterized conserved protein                              |
| arCOG07314 |          |      | S | Uncharacterized conserved protein                              |
| arCOG07321 |          |      | S | Uncharacterized conserved protein                              |
| arCOG07323 |          |      | S | Uncharacterized conserved protein                              |
| arCOG07329 |          |      | S | Uncharacterized conserved protein                              |
| arCOG07716 |          |      | S | SWIM Zn-finger                                                 |
| arCOG07718 |          |      | S | Uncharacterized conserved protein                              |
| arCOG07731 |          |      | S | Uncharacterized conserved protein                              |
| arCOG07847 |          |      | S | Uncharacterized conserved protein                              |
| arCOG07934 |          |      | S | Uncharacterized protein                                        |
| arCOG08078 |          |      | S | TRASH domain-containing protein, metal-binding                 |
| arCOG08305 |          |      | S | Uncharacterized conserved protein                              |
| arCOG08308 |          |      | S | Uncharacterized conserved protein                              |
| arCOG08309 |          |      | S | Uncharacterized conserved protein                              |
| arCOG08315 |          |      | S | Uncharacterized conserved protein                              |
| arCOG08320 |          |      | S | Uncharacterized conserved protein                              |
| arCOG08322 |          |      | S | Zn finger protein                                              |
| arCOG08324 |          |      | S | Uncharacterized conserved protein                              |

|            |          |           |   |                                                            |
|------------|----------|-----------|---|------------------------------------------------------------|
| arCOG08332 |          |           | S | Uncharacterized conserved protein                          |
| arCOG08333 |          |           | S | Uncharacterized conserved protein                          |
| arCOG08334 |          |           | S | Uncharacterized conserved protein                          |
| arCOG08341 |          |           | S | Uncharacterized conserved protein                          |
| arCOG08342 |          |           | S | Uncharacterized conserved protein                          |
| arCOG08372 |          |           | S | Uncharacterized conserved protein                          |
| arCOG08380 |          |           | S | Uncharacterized conserved protein                          |
| arCOG08458 |          |           | S | Uncharacterized conserved protein                          |
| arCOG08462 |          |           | S | Uncharacterized conserved protein                          |
| arCOG08475 |          |           | S | Uncharacterized conserved protein                          |
| arCOG08476 |          |           | S | Uncharacterized conserved protein                          |
| arCOG08479 |          |           | S | Uncharacterized conserved protein                          |
| arCOG08538 |          |           | S | Uncharacterized conserved protein                          |
| arCOG08560 |          |           | S | Uncharacterized conserved protein                          |
| arCOG09871 |          |           | S | SWIM Zn-finger                                             |
| arCOG09929 |          |           | S | Uncharacterized conserved protein                          |
| arCOG09970 |          |           | S | Uncharacterized conserved protein                          |
| arCOG09993 |          |           | S | Uncharacterized conserved protein                          |
| arCOG10002 |          |           | S | Uncharacterized conserved protein                          |
| arCOG10132 |          |           | S | Uncharacterized conserved protein                          |
| arCOG10265 |          |           | S | Uncharacterized conserved protein                          |
| arCOG05042 |          |           | S | Uncharacterized conserved protein                          |
| arCOG07198 |          |           | S | Uncharacterized conserved membrane protein                 |
| arCOG07213 |          |           | S | Uncharacterized conserved protein                          |
| arCOG05911 | COG01826 | TatA      | U | Sec-independent protein secretion pathway component        |
| arCOG00713 | COG01848 | -         | V | PIN domain containing protein                              |
| arCOG02657 | COG01336 | Cas7/Cmr4 | V | CRISPR system related protein, RAMP superfamily Cas7 group |
| arCOG02681 | COG01753 | -         | V | Predicted antitoxin, copG family                           |
| arCOG03436 | COG01517 | -         | V | CRISPR system related protein, COG1517 family              |
| arCOG07237 |          |           | V | Uncharacterized protein contains PIN domain                |
| arCOG07309 |          | PlrA      | V | Plasmid regulatory DNA-binding protein                     |

**Loss in Acd1 and other Sulfolobales**

|            |          |      |   |                                                                                                  |
|------------|----------|------|---|--------------------------------------------------------------------------------------------------|
| arCOG00104 | COG01795 | -    | C | Formaldehyde-activating enzyme necessary for methanogenesis                                      |
| arCOG00296 | COG01145 | NapF | C | Ferredoxin                                                                                       |
| arCOG00349 | COG01141 | Fer  | C | Ferredoxin                                                                                       |
| arCOG00422 | COG01085 | GalT | C | Galactose-1-phosphate uridylyltransferase                                                        |
| arCOG00509 | COG00426 | FpaA | C | Uncharacterized flavoprotein                                                                     |
| arCOG00706 | COG02414 | -    | C | Aldehyde:ferredoxin oxidoreductase                                                               |
| arCOG00707 | COG02414 | -    | C | Aldehyde:ferredoxin oxidoreductase                                                               |
| arCOG00709 | COG02414 | -    | C | Aldehyde:ferredoxin oxidoreductase                                                               |
| arCOG00762 | COG02191 | -    | C | Formylmethanofuran dehydrogenase subunit E                                                       |
| arCOG00961 | COG01145 | GlpC | C | Ferredoxin                                                                                       |
| arCOG01355 | COG01032 | -    | C | Radical SAM superfamily enzyme                                                                   |
| arCOG01359 | COG01031 | -    | C | Radical SAM superfamily enzyme                                                                   |
| arCOG01364 | COG01032 | -    | C | Radical SAM superfamily enzyme                                                                   |
| arCOG01497 | COG05013 | NarG | C | Nitrate reductase alpha subunit                                                                  |
| arCOG01501 | COG01140 | NarY | C | Nitrate reductase beta subunit                                                                   |
| arCOG01502 | COG01142 | HycB | C | Fe-S-cluster-containing hydrogenase component 2                                                  |
| arCOG01504 | COG02180 | NarJ | C | Nitrate reductase delta subunit                                                                  |
| arCOG01607 | COG00674 | PorA | C | Pyruvate:ferredoxin oxidoreductase or related 2-oxoacid:ferredoxin oxidoreductase, alpha subunit |
| arCOG01705 | COG01036 | -    | C | Archaeal flavoprotein                                                                            |
| arCOG02077 | COG00822 | IscU | C | NifU homolog involved in Fe-S cluster formation                                                  |
| arCOG02095 | COG05016 | -    | C | Pyruvate/oxaloacetate carboxyltransferase                                                        |
| arCOG02146 | COG02033 | -    | C | Desulfoferredoxin                                                                                |
| arCOG02461 | COG01146 | -    | C | Ferredoxin                                                                                       |
| arCOG02472 | COG01941 | FrhG | C | Coenzyme F420-reducing hydrogenase, gamma subunit                                                |



|            |          |      |   |                                                                                                                                 |
|------------|----------|------|---|---------------------------------------------------------------------------------------------------------------------------------|
| arCOG02720 | COG01271 | CydA | C | Cytochrome bd-type quinol oxidase, subunit 1                                                                                    |
| arCOG02721 | COG01271 | CydA | C | Cytochrome bd-type quinol oxidase, subunit 1                                                                                    |
| arCOG03363 | COG02811 | NtpF | C | Archaeal/vacuolar-type H <sup>+</sup> -ATPase subunit H                                                                         |
| arCOG04073 | COG01149 | -    | C | MinD superfamily P-loop ATPase containing an inserted ferredoxin domain                                                         |
| arCOG04162 | COG02142 | SdhD | C | Succinate dehydrogenase, hydrophobic anchor subunit                                                                             |
| arCOG04279 | COG01786 | -    | C | Swiveling domain associated with predicted aconitase                                                                            |
| arCOG04406 | COG01838 | FumA | C | Tartrate dehydratase beta subunit/Fumarate hydratase class I, C-terminal domain                                                 |
| arCOG04407 | COG01951 | TtdA | C | Tartrate dehydratase alpha subunit/Fumarate hydratase class I, N-terminal domain                                                |
| arCOG04537 | COG01894 | NuoF | C | NADH:ubiquinone oxidoreductase, NADH-binding (51 kD) subunit                                                                    |
| arCOG04949 | COG03808 | OVP1 | C | Inorganic pyrophosphatase                                                                                                       |
| arCOG05014 | COG02181 | HdrE | C | CoB-CoM heterodisulfide reductase subunit E                                                                                     |
| arCOG05072 | COG02414 | -    | C | Aldehyde:ferredoxin oxidoreductase                                                                                              |
| arCOG06549 |          |      | C | Membrane-bound multiheme cytochrome c subunit                                                                                   |
| arCOG00370 | COG01196 | Smc  | D | Chromosome segregation ATPase                                                                                                   |
| arCOG00371 | COG01196 | Smc  | D | Chromosome segregation ATPase                                                                                                   |
| arCOG04701 | COG00239 | CrcB | D | Integral membrane protein possibly involved in chromosome condensation                                                          |
| arCOG00055 | COG00421 | SpeE | E | Spermidine synthase                                                                                                             |
| arCOG00066 | COG01104 | NifS | E | Cysteine sulfinate desulfinase/cysteine desulfurase or related enzyme                                                           |
| arCOG00071 | COG00367 | AsnB | E | Asparagine synthase (glutamine-hydrolyzing) PAPS reductase related enzyme fused to RNA-binding PUA domain and ferredoxin domain |
| arCOG00073 | COG00175 | CysH | E | 3'-phosphoadenosine 5'-phosphosulfate sulfotransferase (PAPS reductase)/FAD synthetase or related enzyme                        |
| arCOG00075 | COG00175 | CysH | E | ABC-type spermidine/putrescine transport system, permease component I                                                           |
| arCOG00161 | COG01176 | PotB | E | ABC-type spermidine/putrescine transport system, permease component II                                                          |
| arCOG00162 | COG01177 | PotC | E | Spermidine/putrescine-binding periplasmic protein                                                                               |
| arCOG00220 | COG00687 | PotD | E | Saccharopine dehydrogenase or related enzyme                                                                                    |
| arCOG00243 | COG01748 | LYS9 | E | CubicO group peptidase, beta-lactamase class C family                                                                           |
| arCOG00771 | COG01680 |      | E | Acetolactate synthase, small subunit                                                                                            |
| arCOG00811 | COG00440 | IlvH | E | Carbamate kinase                                                                                                                |
| arCOG00863 | COG00549 | ArcC | E | ABC-type polar amino acid transport system, ATPase component                                                                    |
| arCOG00923 | COG01126 | GlnQ | E | ABC-type branched-chain amino acid transport system, ATPase component                                                           |
| arCOG00926 | COG00411 | LivG | E | ABC-type branched-chain amino acid transport system, periplasmic component                                                      |
| arCOG01020 | COG00683 | LivK | E | Phosphoserine phosphatase                                                                                                       |
| arCOG01158 | COG00560 | SerB | E | Branched-chain amino acid ABC-type transport system, permease component                                                         |
| arCOG01270 | COG00559 | LivH | E | ABC-type branched-chain amino acid transport system, permease component                                                         |
| arCOG01274 | COG04177 | LivM | E | ABC-type amino acid transport system, permease component                                                                        |
| arCOG01798 | COG00765 | HisM | E | ABC-type amino acid transport/signal transduction system, periplasmic component/domain                                          |
| arCOG01799 | COG00834 | HisJ | E | Isopropylmalate/homocitrate/citramalate synthase                                                                                |
| arCOG02093 | COG00119 | LeuA | E | Transglutaminase-like enzyme, putative cysteine protease                                                                        |
| arCOG02167 | COG01305 | -    | E |                                                                                                                                 |

|            |          |      |   |                                                                                |
|------------|----------|------|---|--------------------------------------------------------------------------------|
| arCOG02169 | COG01305 | -    | E | Transglutaminase-like enzyme, putative cysteine protease                       |
| arCOG02297 | COG00115 | IlvE | E | Branched-chain amino acid aminotransferase/4-amino-4-deoxychorismate lyase     |
| arCOG02305 | COG00347 | GlnK | E | Nitrogen regulatory protein PII                                                |
| arCOG02486 | COG01305 | -    | E | Transglutaminase-like enzyme, putative cysteine protease                       |
| arCOG03109 | COG01834 | -    | E | N-Dimethylarginine dimethylaminohydrolase                                      |
| arCOG03377 |          |      | E | Serine protease                                                                |
| arCOG03602 | COG04690 | PepD | E | Dipeptidase                                                                    |
| arCOG05680 | COG03978 |      | E | Acetolactate synthase small subunit (ACT domain)                               |
| arCOG05757 | COG04377 |      | E | Metal-dependent membrane protease, CAAX family, DUF2324 subfamily              |
| arCOG00612 | COG00516 | GuaB | F | IMP dehydrogenase/GMP reductase                                                |
| arCOG00693 | COG01001 | AdeC | F | Adenine deaminase                                                              |
| arCOG00700 | COG00402 | SsnA | F | Cytosine deaminase related metal-dependent hydrolase fused to KH domain        |
| arCOG01046 | COG00563 | Adk  | F | Adenylate kinase or related kinase                                             |
| arCOG02013 | COG00213 | DeoA | F | Thymidine phosphorylase                                                        |
| arCOG03214 | COG00207 | ThyA | F | Thymidylate synthase                                                           |
| arCOG04320 | COG00274 | DeoC | F | Deoxyribose-phosphate aldolase                                                 |
| arCOG04889 | COG01328 | NrdD | F | Oxygen-sensitive ribonucleoside-triphosphate reductase                         |
| arCOG00026 | COG01070 | XylB | G | Sugar (pentulose and hexulose) kinase                                          |
| arCOG00139 | COG00477 | ProP | G | Permease of the major facilitator superfamily                                  |
| arCOG00146 | COG02211 | MelB | G | Na <sup>+</sup> /melibiose symporter or related transporter                    |
| arCOG00149 | COG01653 | UgpB | G | ABC-type sugar transport system, periplasmic component                         |
| arCOG00151 | COG01653 | UgpB | G | ABC-type sugar transport system, periplasmic component                         |
| arCOG00152 | COG02182 | MalE | G | Maltose-binding periplasmic protein                                            |
| arCOG00180 | COG03839 | MalK | G | ABC-type sugar transport system, ATPase component                              |
| arCOG00272 | COG00697 | RhaT | G | permease of the drug/metabolite transporter (DMT) superfamily                  |
| arCOG01029 | COG00153 | GalK | G | Galactokinase                                                                  |
| arCOG01518 | COG01363 | FrvX | G | Cellulase M or related protein                                                 |
| arCOG01772 | COG02407 | Fucl | G | L-fucose isomerase or related protein                                          |
| arCOG01895 | COG01082 | IolE | G | Sugar phosphate isomerase/epimerase                                            |
| arCOG01900 | COG01082 | IolE | G | Sugar phosphate isomerase/epimerase                                            |
| arCOG02831 | COG00380 | OtsA | G | Trehalose-6-phosphate synthase                                                 |
| arCOG02876 | COG00726 | CDA1 | G | Predicted xylanase/chitin deacetylase                                          |
| arCOG02877 | COG00726 | CDA1 | G | Predicted xylanase/chitin deacetylase                                          |
| arCOG02878 | COG00726 | CDA1 | G | Predicted xylanase/chitin deacetylase                                          |
| arCOG02948 | COG00366 | AmyA | G | Glycosidase                                                                    |
| arCOG03003 | COG00662 |      | G | Protein containing cupin domain                                                |
| arCOG04084 | COG02152 | -    | G | Predicted glycosylase                                                          |
| arCOG04158 |          |      | G | Mannosyl-3-phosphoglycerate synthase                                           |
| arCOG04226 | COG00235 |      | G | Fuculose-1-phosphate aldolase                                                  |
| arCOG04296 | COG00477 | ProP | G | Permease of the major facilitator superfamily                                  |
| arCOG04443 | COG01850 | RbcL | G | Ribulose 1,5-bisphosphate carboxylase, large subunit                           |
| arCOG04934 | COG00726 |      | G | Polysaccharide deacetylase                                                     |
| arCOG04974 | COG03836 | HpcH | G | 2,4-dihydroxyhept-2-ene-1,7-dioic acid aldolase                                |
| arCOG05856 | COG01874 | LacA | G | Beta-galactosidase                                                             |
| arCOG06070 | COG01486 | CelF | G | Alpha-galactosidase/6-phospho-beta-glucosidase, family 4 of glycosyl hydrolase |
| arCOG07158 | COG01554 | ATH1 | G | Sugar hydrolase/phosphorylase                                                  |
| arCOG07452 | COG03525 | Chb  | G | N-acetyl-beta-hexosaminidase                                                   |
| arCOG07490 | COG03281 | Ble  | G | Uncharacterized protein, probably involved in trehalose biosynthesis           |
| arCOG07700 | COG02730 | BglC | G | Endoglucanase                                                                  |
| arCOG07813 |          |      | G | Glycosyl hydrolases family 43                                                  |
| arCOG08882 | COG00698 | RpiB | G | Ribose 5-phosphate isomerase RpiB                                              |

|            |          |        |   |                                                                                        |
|------------|----------|--------|---|----------------------------------------------------------------------------------------|
| arCOG00166 | COG04662 | TupA   | H | ABC-type tungstate transport system, periplasmic component                             |
| arCOG00229 | COG02998 | TupB   | H | ABC-type tungstate transport system, permease component                                |
| arCOG00480 | COG01575 | MenA   | H | 1,4-dihydroxy-2-naphthoate octaprenyltransferase                                       |
| arCOG00656 | COG01060 | ThiH   | H | Thiamine biosynthesis enzyme ThiH, FO synthase or related uncharacterized enzyme       |
| arCOG00954 | COG02896 | MoaA   | H | Molybdenum cofactor biosynthesis enzyme                                                |
| arCOG01089 | COG00352 | ThiE   | H | Thiamine monophosphate synthase                                                        |
| arCOG01483 | COG00157 | NadC   | H | Nicotinate-nucleotide pyrophosphorylase                                                |
| arCOG01861 | COG03481 | MptB   | H | Methanopterin biosynthesis cyclic phosphodiesterase, HD-superfamily hydrolase          |
| arCOG02049 | COG01587 | HemD   | H | Uroporphyrinogen-III synthase                                                          |
| arCOG04139 | COG01893 | ApbA   | H | Ketopantoate reductase                                                                 |
| arCOG04301 | COG01469 | MptA   | H | Fe(2+)-dependent GTP cyclohydrolase                                                    |
| arCOG04336 | COG01962 | MtrH   | H | Tetrahydromethanopterin S-methyltransferase, subunit H                                 |
| arCOG06472 | COG01240 |        | H | Mg-chelatase subunit ChID                                                              |
| arCOG08631 | COG01995 | PdxA   | H | Pyridoxal phosphate biosynthesis protein                                               |
| arCOG00674 | COG00558 | PgsA   | I | Phosphatidylglycerophosphate synthase                                                  |
| arCOG01650 | COG02267 | PldB   | I | Lysophospholipase, alpha-beta hydrolase superfamily                                    |
| arCOG01843 | COG03255 | -      | I | Putative sterol carrier protein                                                        |
| arCOG01869 | COG01267 | PgpA   | I | Phosphatidylglycerophosphatase A fused to adenosylcobinamide amidohydrolase, CbiZ      |
| arCOG01882 | COG00170 | SEC59  | I | Dolichol kinase                                                                        |
| arCOG01986 | COG04670 | -      | I | Acyl CoA:acetate/3-ketoacid CoA transferase                                            |
| arCOG02041 | COG01502 | Cls    | I | Phosphatidylserine/phosphatidylglycerophosphate/cardiolipin synthase or related enzyme |
| arCOG03058 | COG00671 | PgpB   | I | Membrane-associated phospholipid phosphatase                                           |
| arCOG08627 |          |        | I | Alkaline ceramidase                                                                    |
| arCOG00407 | COG00017 | AsnS   | J | Aspartyl/asparaginyl-tRNA synthetase                                                   |
| arCOG00409 | COG00017 | AsnS   | J | Aspartyl/asparaginyl-tRNA synthetase                                                   |
| arCOG00485 | COG01384 | LysS   | J | Lysyl-tRNA synthetase (class I)                                                        |
| arCOG00547 | COG00595 | -      | J | mRNA degradation ribonuclease J1/J2 (metallo-beta-lactamase superfamily)               |
| arCOG00953 | COG00731 | TYW3   | J | Homolog of Wybutosine (yW) biosynthesis enzyme, Fe-S oxidoreductase                    |
| arCOG00974 | COG00144 | Sun    | J | tRNA or rRNA cytosine-C5-methylase                                                     |
| arCOG00990 | COG01549 | -      | J | Queuine tRNA-ribosyltransferase, contain PUA domain                                    |
| arCOG01124 | COG01184 | GCD2   | J | Translation initiation factor 2B subunit, eIF-2B alpha/beta/delta family               |
| arCOG01125 | COG01184 | GCD2   | J | Translation initiation factor 2B subunit, eIF-2B alpha/beta/delta family               |
| arCOG01239 | COG01901 | RsmE   | J | RNA base methyltransferase family enzyme                                               |
| arCOG02197 | COG01617 | Cgi121 | J | Subunit of KEOPS complex, involved (Cgi121BUD32KAE1)                                   |
| arCOG03218 | COG04021 | Thg1   | J | tRNAHis guanylyltransferase                                                            |
| arCOG04057 |          |        | J | Ribosomal L38E                                                                         |
| arCOG04063 | COG01859 | KptA   | J | RNA:NAD 2'-phosphotransferase                                                          |
| arCOG04304 | COG02451 | -      | J | Ribosomal protein L35AE/L33A                                                           |
| arCOG04332 | COG02606 | Ybak   | J | Cys-tRNA(Pro)/Cys-tRNA(Cys) deacylase, ybaK family                                     |
| arCOG00743 |          |        | K | Predicted transcriptional regulator                                                    |
| arCOG00844 | COG00454 | WecD   | K | Acetyltransferase (GNAT) family                                                        |
| arCOG00876 | COG01061 | SSL2   | K | DNA or RNA helicase of superfamily II                                                  |
| arCOG00921 | COG01318 | -      | K | Predicted transcriptional regulator                                                    |
| arCOG01680 | COG00640 | ArsR   | K | Transcriptional regulator containing HTH domain, ArsR family                           |
| arCOG01683 | COG00640 | ArsR   | K | Transcriptional regulator containing HTH domain, ArsR family                           |
| arCOG01687 | COG00640 | ArsR   | K | Transcriptional regulator containing HTH domain, ArsR family                           |
| arCOG02038 | COG01378 | -      | K | Sugar-specific transcriptional regulator TrmB                                          |

|            |          |      |   |                                                                                                          |
|------------|----------|------|---|----------------------------------------------------------------------------------------------------------|
| arCOG02611 | COG03398 | -    | K | Predicted transcriptional regulator, contained two HTH domains                                           |
| arCOG02795 | COG01510 | -    | K | Predicted transcriptional regulator DNA-binding protein, potential antitoxin                             |
| arCOG03880 | COG02880 | -    | K | AbrB/MazE fold                                                                                           |
| arCOG03936 | COG02002 | AbrB | K | Transcriptional regulator AbrB                                                                           |
| arCOG04280 | COG01940 | NagC | K | Transcriptional regulator/sugar kinase                                                                   |
| arCOG04554 | COG01356 | txf  | K | Transcriptional regulator Superfamily II DNA/RNA helicase, SNF2 family                                   |
| arCOG04818 | COG00553 | HepA | K | DNA-binding protein, potential antitoxin                                                                 |
| arCOG07152 | COG02880 | -    | K | AbrB/MazE fold                                                                                           |
| arCOG07561 | COG02512 | -    | K | Predicted regulatory protein containing HTH domain                                                       |
| arCOG10049 | COG02880 | -    | K | DNA-binding protein, potential antitoxin                                                                 |
| arCOG00048 | COG00116 | -    | L | AbrB/MazE fold                                                                                           |
| arCOG00282 | COG00433 | -    | L | Predicted N6-adenine-specific DNA methylase                                                              |
| arCOG00424 | COG00608 | -    | L | HerA helicase                                                                                            |
| arCOG00426 | COG00608 | RecJ | L | DHH superfamily phosphohydrolase/exonuclease                                                             |
| arCOG00464 | COG00122 | AlkA | L | DHH superfamily phosphohydrolase/exonuclease                                                             |
| arCOG00465 | COG02231 | -    | L | 3-methyladenine DNA glycosylase/8-oxoguanine DNA glycosylase                                             |
| arCOG00472 | COG01474 | -    | L | Uncharacterized protein related to Endonuclease III                                                      |
| arCOG00560 | COG00514 | RecQ | L | orc1/cdc6 family replication initiation protein fused to HTH domain                                      |
| arCOG01291 | COG01533 | SplB | L | Superfamily II DNA helicase                                                                              |
| arCOG02636 | COG00827 | -    | L | DNA repair photolyase                                                                                    |
| arCOG03145 | COG01372 | -    | L | Adenine-specific DNA methylase                                                                           |
| arCOG03151 | COG01372 | -    | L | Intein/homing endonuclease                                                                               |
| arCOG03154 | COG01372 | -    | L | Intein/homing endonuclease                                                                               |
| arCOG03155 | COG01241 | MCM2 | L | Intein/homing endonuclease                                                                               |
| arCOG03156 | COG03780 | -    | L | Cdc46/Mcm family protein (inactivated) DNA endonuclease related to intein-encoded endonuclease           |
| arCOG03158 | COG01372 | -    | L | Intein/homing endonuclease                                                                               |
| arCOG03192 | COG01525 | -    | L | Micrococcal nuclease (thermonuclease)                                                                    |
| arCOG03242 | COG01195 | RecF | L | Recombinational DNA repair ATPase RecF                                                                   |
| arCOG03727 | COG01591 | -    | L | Restriction endonuclease family enzyme                                                                   |
| arCOG04144 | COG04047 | -    | L | 8-oxoguanine DNA glycosylase                                                                             |
| arCOG04155 | COG00177 | -    | L | HhH-GPD superfamily base excision DNA repair protein                                                     |
| arCOG04295 | COG02094 | Mpg  | L | 3-methyladenine DNA glycosylase                                                                          |
| arCOG04306 | COG04998 | -    | L | Predicted endonuclease (RecB family)                                                                     |
| arCOG00118 | COG00399 | WecE | M | Predicted pyridoxal phosphate-dependent enzyme apparently involved in regulation of cell wall biogenesis |
| arCOG00252 | COG00677 | WecC | M | UDP-N-acetyl-D-mannosaminuronate dehydrogenase                                                           |
| arCOG00566 | COG01807 | ArnT | M | 4-amino-4-deoxy-L-arabinose transferase or related glycosyltransferase of PMT family                     |
| arCOG00609 | COG00750 | -    | M | Predicted membrane-associated Zn-dependent protease                                                      |
| arCOG00673 | COG01213 | -    | M | Predicted sugar nucleotidyltransferase                                                                   |
| arCOG00836 | COG01247 | -    | M | Sortase or related acyltransferase                                                                       |
| arCOG01310 | COG00451 | WcaG | M | Uncharacterized conserved protein                                                                        |
| arCOG01376 | COG00451 | WcaG | M | Nucleoside-diphosphate-sugar epimerase                                                                   |
| arCOG01390 | COG00463 | WcaA | M | Glycosyltransferase                                                                                      |
| arCOG01392 | COG00381 | WecB | M | Glycosyltransferase                                                                                      |
| arCOG01405 | COG00438 | RfaG | M | UDP-N-acetylglucosamine 2-epimerase                                                                      |
| arCOG01410 | COG00438 | RfaG | M | Glycosyltransferase                                                                                      |
| arCOG01418 | COG00438 | RfaG | M | Glycosyltransferase                                                                                      |
| arCOG04468 | COG00451 | WcaG | M | Glycosyltransferase                                                                                      |
| arCOG01811 | COG02064 | TadC | N | Nucleoside-diphosphate-sugar epimerase                                                                   |
| arCOG01812 | COG02064 | TadC | N | Flp pilus assembly protein TadC                                                                          |
| arCOG00299 | COG01404 | AprE | O | Flp pilus assembly protein TadC                                                                          |
| arCOG00702 | COG01404 | AprE | O | DsbA family protein                                                                                      |
| arCOG00704 | COG01404 | AprE | O | Subtilisin-like serine protease                                                                          |
|            |          |      |   | Ssurface layer-associated subtilisin-like serine protease                                                |

|            |          |      |   |                                                                                                     |
|------------|----------|------|---|-----------------------------------------------------------------------------------------------------|
| arCOG00936 | COG01180 | PflA | O | Pyruvate-formate lyase-activating enzyme                                                            |
| arCOG00947 | COG01180 | PflA | O | Pyruvate-formate lyase-activating enzyme                                                            |
| arCOG00948 | COG01180 | PflA | O | Pyruvate-formate lyase-activating enzyme                                                            |
| arCOG00949 | COG01180 | PflA | O | Pyruvate-formate lyase-activating enzyme                                                            |
| arCOG00952 | COG01180 | PflA | O | Pyruvate-formate lyase-activating enzyme                                                            |
| arCOG01311 | COG00616 | SppA | O | Periplasmic serine protease (ClpP class)                                                            |
| arCOG01911 | COG00616 | SppA | O | Periplasmic serine protease (ClpP class)                                                            |
| arCOG02163 | COG04930 | -    | O | Predicted ATP-dependent Lon-type protease                                                           |
| arCOG02406 | COG00785 | CcdA | O | Cytochrome c biogenesis protein                                                                     |
| arCOG02407 | COG00526 | TrxA | O | Thioredoxin fused to Cytochrome c biogenesis protein                                                |
| arCOG02868 | COG01651 | DsbG | O | Protein-disulfide isomerase                                                                         |
| arCOG02872 | COG01651 | DsbG | O | Protein-disulfide isomerase                                                                         |
| arCOG03741 | COG05550 | -    | O | Predicted aspartyl protease                                                                         |
| arCOG03742 | COG05550 | -    | O | Predicted aspartyl protease                                                                         |
| arCOG03744 | COG05550 | -    | O | Predicted aspartyl protease                                                                         |
| arCOG03745 | COG05550 | -    | O | Predicted aspartyl protease                                                                         |
| arCOG04933 | COG04826 | -    | O | Serine protease inhibitor                                                                           |
| arCOG05634 | COG03058 | FdhE | O | Uncharacterized protein involved in formate dehydrogenase formation                                 |
| arCOG06075 | COG00526 | TrxA | O | Thiol-disulfide isomerase or thioredoxin                                                            |
| arCOG06823 | COG01404 | AprE | O | Subtilisin-like serine protease                                                                     |
| arCOG00163 | COG01178 | ThiP | P | ABC-type Fe <sup>3+</sup> transport system, permease component                                      |
| arCOG00169 | COG00600 | TauC | P | ABC-type nitrate/sulfonate/bicarbonate transport system, permease component                         |
| arCOG00201 | COG01121 | ZnuC | P | ABC-type Mn/Zn transport system, ATPase component                                                   |
| arCOG00202 | COG01122 | CbiO | P | ABC-type cobalt transport system, ATPase component                                                  |
| arCOG00221 | COG01840 | AfuA | P | ABC-type Fe <sup>3+</sup> transport system, periplasmic component                                   |
| arCOG00232 | COG00704 | PhoU | P | Phosphate uptake regulator                                                                          |
| arCOG00237 | COG00471 | CitT | P | Di- and tricarboxylate transporter                                                                  |
| arCOG00359 | COG00370 | FeoB | P | Fe <sup>2+</sup> transport system protein B                                                         |
| arCOG00624 | COG01824 | -    | P | Permease, similar to cation transporter                                                             |
| arCOG01005 | COG00803 | Lral | P | ABC-type metal ion transport system, periplasmic component/surface adhesin                          |
| arCOG01006 | COG01108 | ZnuB | P | ABC-type Mn <sup>2+</sup> /Zn <sup>2+</sup> transport system, permease component                    |
| arCOG01040 | COG00529 | CysC | P | Adenylylsulfate kinase or related kinase                                                            |
| arCOG01094 | COG02193 | Bfr  | P | Bacterioferritin (cytochrome b1)                                                                    |
| arCOG01095 | COG01528 | Ftn  | P | Ferritin                                                                                            |
| arCOG01474 | COG00053 | MMT1 | P | Predicted Co/Zn/Cd cation transporter                                                               |
| arCOG01803 | COG00715 | TauA | P | ABC-type nitrate/sulfonate/bicarbonate transport system, periplasmic component                      |
| arCOG01957 | COG00569 | TrkA | P | K <sup>+</sup> transport system, NAD-binding component                                              |
| arCOG01964 | COG01226 | Kch  | P | Kef-type K <sup>+</sup> transport system, predicted NAD-binding component                           |
| arCOG01970 | COG00490 | -    | P | Putative regulatory, ligand-binding protein related to C-terminal domain of K <sup>+</sup> channels |
| arCOG02102 | COG01918 | FeoA | P | Fe <sup>2+</sup> transport system protein A                                                         |
| arCOG02248 | COG00310 | CbiM | P | ABC-type Co <sup>2+</sup> transport system, permease component                                      |
| arCOG02252 | COG00619 | CbiQ | P | ABC-type cobalt transport system, permease component CbiQ or related transporter                    |
| arCOG02265 | COG00598 | CorA | P | Mg <sup>2+</sup> and Co <sup>2+</sup> transporter                                                   |
| arCOG02787 | COG03119 | AslA | P | Arylsulfatase A or related enzyme                                                                   |
| arCOG02849 | COG00003 | ArsA | P | Oxyanion-translocating ATPase                                                                       |
| arCOG03072 | COG01006 | MnhC | P | Multisubunit Na <sup>+</sup> /H <sup>+</sup> antiporter, MnhC subunit                               |
| arCOG03076 | COG01563 | -    | P | Predicted subunit of the Multisubunit Na <sup>+</sup> /H <sup>+</sup> antiporter                    |
| arCOG03077 | COG02111 | MnhB | P | Multisubunit Na <sup>+</sup> /H <sup>+</sup> antiporter, MnhB subunit                               |
| arCOG03078 | COG01563 | -    | P | Predicted subunit of the Multisubunit Na <sup>+</sup> /H <sup>+</sup> antiporter                    |

|            |          |      |   |                                                                                      |
|------------|----------|------|---|--------------------------------------------------------------------------------------|
| arCOG03079 | COG02111 | MnhB | P | Multisubunit Na <sup>+</sup> /H <sup>+</sup> antiporter, MnhB subunit                |
| arCOG03082 | COG01320 | MnhG | P | Multisubunit Na <sup>+</sup> /H <sup>+</sup> antiporter, MnhG subunit                |
| arCOG03099 | COG01863 | MnhE | P | Multisubunit Na <sup>+</sup> /H <sup>+</sup> antiporter, MnhE subunit                |
| arCOG03121 | COG02212 | MnhF | P | Multisubunit Na <sup>+</sup> /H <sup>+</sup> antiporter, MnhF subunit                |
| arCOG03159 | COG00310 | CbiM | P | ABC-type Co <sup>2+</sup> transport system, permease component                       |
| arCOG03303 | COG00614 | FepB | P | ABC-type Fe <sup>3+</sup> -hydroxamate transport system, periplasmic component       |
| arCOG03304 | COG00614 | FepB | P | ABC-type Fe <sup>3+</sup> -hydroxamate transport system, periplasmic component       |
| arCOG03454 | COG02116 | FocA | P | Formate/nitrite family of transporter                                                |
| arCOG04118 |          |      | P | Mn <sup>2+</sup> /Fe <sup>2+</sup> transporter, NRAMP family                         |
| arCOG04145 | COG00168 | TrkG | P | Trk-type K <sup>+</sup> transport system, membrane component                         |
| arCOG04330 | COG00672 | FTR1 | P | High-affinity Fe <sup>2+</sup> /Pb <sup>2+</sup> permease                            |
| arCOG05758 |          |      | P | TrkA-C domain containing protein                                                     |
| arCOG06434 | COG02059 | ChrA | P | Chromate transport protein ChrA                                                      |
| arCOG07018 | COG02847 | -    | P | Copper(I)-binding protein                                                            |
| arCOG01774 | COG00500 |      | Q | SAM-dependent methyltransferase                                                      |
| arCOG03773 | COG00500 |      | Q | SAM-dependent methyltransferase                                                      |
| arCOG04198 |          |      | Q | Ethylbenzene dehydrogenase                                                           |
| arCOG04347 | COG00500 |      | Q | SAM-dependent methyltransferase                                                      |
| arCOG00032 | COG01092 | -    | R | SAM-dependent methyltransferase fused to PUA domain                                  |
| arCOG00036 | COG02102 | -    | R | Predicted ATPase of PP-loop superfamily                                              |
| arCOG00041 | COG01926 | -    | R | Predicted phosphoribosyltransferase                                                  |
| arCOG00043 | COG01606 | -    | R | ATP-utilizing enzyme of the PP-loop superfamily                                      |
| arCOG00054 | COG02521 | -    | R | Predicted archaeal methyltransferase                                                 |
| arCOG00056 | COG01818 | -    | R | Predicted RNA-binding protein, contains THUMP domain                                 |
| arCOG00186 | COG03845 | -    | R | ABC-type uncharacterized transport system, ATPase component                          |
| arCOG00257 | COG01744 | Med  | R | Uncharacterized ABC-type transport system, periplasmic component/surface lipoprotein |
| arCOG00258 | COG01744 | Med  | R | Uncharacterized ABC-type transport system, periplasmic component/surface lipoprotein |
| arCOG00259 | COG04603 | -    | R | ABC-type uncharacterized transport system, permease component                        |
| arCOG00260 | COG04603 | -    | R | ABC-type uncharacterized transport system, permease component                        |
| arCOG00261 | COG01079 | -    | R | Uncharacterized ABC-type transport system, permease component                        |
| arCOG00281 | COG00433 | -    | R | Predicted ATPase                                                                     |
| arCOG00348 | COG02047 | -    | R | Archaeal enzyme of ATP-grasp superfamily                                             |
| arCOG00435 | COG00714 | -    | R | MoxR-like ATPase                                                                     |
| arCOG00441 | COG00714 | -    | R | MoxR-like ATPase                                                                     |
| arCOG00655 | COG01427 | -    | R | Predicted periplasmic solute-binding protein                                         |
| arCOG00691 | COG01574 | -    | R | Predicted metal-dependent hydrolase with the TIM-barrel fold                         |
| arCOG00754 | COG00579 | -    | R | Malate/quinone oxidoreductase or related dehydrogenase                               |
| arCOG00828 | COG03393 | -    | R | Predicted acetyltransferase                                                          |
| arCOG00893 | COG01831 | -    | R | Predicted metal-dependent hydrolase (urease superfamily)                             |
| arCOG00951 | COG02100 | -    | R | Radical SAM superfamily enzyme                                                       |
| arCOG01144 | COG01409 | lcc  | R | Predicted phosphohydrolase                                                           |
| arCOG01156 | COG01408 | -    | R | Calcineurin-like phosphohydrolase                                                    |
| arCOG01210 |          |      | R | Predicted nucleotidyltransferase and HTH domain                                      |
| arCOG01211 | COG01708 | -    | R | Minimal nucleotidyltransferase                                                       |
| arCOG01215 | COG03769 | -    | R | HAD superfamily hydrolase                                                            |
| arCOG01229 | COG02403 | -    | R | Predicted GTPase                                                                     |
| arCOG01293 | COG00446 | HcaD | R | NAD(FAD)-dependent dehydrogenase                                                     |
| arCOG01294 | COG00446 | HcaD | R | NAD(FAD)-dependent dehydrogenase                                                     |

|            |          |      |   |                                                                                                 |
|------------|----------|------|---|-------------------------------------------------------------------------------------------------|
| arCOG01395 | COG01817 | -    | R | Lipid-A-disaccharide synthase related glycosyltransferase                                       |
| arCOG01565 | COG00618 | -    | R | Exopolyphosphatase-related protein                                                              |
| arCOG01641 | COG03269 | -    | R | Predicted RNA-binding protein, contains TRAM domain                                             |
| arCOG01649 | COG01073 | -    | R | Alpha/beta superfamily hydrolase                                                                |
| arCOG01651 | COG01073 | -    | R | Alpha/beta superfamily hydrolase                                                                |
| arCOG01688 | COG01719 | -    | R | Predicted transcriptional regulator, contains HTH and 4VR domain                                |
| arCOG01744 | COG01988 | -    | R | Membrane-bound metal-dependent hydrolase                                                        |
| arCOG01801 | COG02358 | Imp  | R | TRAP-type uncharacterized transport system, periplasmic component                               |
| arCOG01806 |          |      | R | ACT domain containing protein                                                                   |
| arCOG01848 | COG00110 | WbbJ | R | Acetyltransferase (isoleucine patch superfamily)                                                |
| arCOG01860 | COG01418 | -    | R | Predicted HD superfamily hydrolase                                                              |
| arCOG01906 | COG04666 | -    | R | TRAP-type uncharacterized transport system, fused permease component                            |
| arCOG01963 | COG03273 | -    | R | PhoU-like domain fused to TrkA-C domain                                                         |
| arCOG02016 | COG01853 | -    | R | Conserved protein/domain typically associated with flavoprotein oxygenase, DIM6/NTAB family     |
| arCOG02028 | COG05012 | -    | R | Predicted cobalamin binding protein                                                             |
| arCOG02035 | COG03894 | -    | R | Uncharacterized metal-binding protein                                                           |
| arCOG02105 | COG01708 | -    | R | Minimal nucleotidyltransferase                                                                  |
| arCOG02106 | COG01708 | -    | R | Minimal nucleotidyltransferase                                                                  |
| arCOG02112 | COG01708 | -    | R | Minimal nucleotidyltransferase fused to HEPN domain                                             |
| arCOG02164 | COG01800 | -    | R | Predicted transglutaminase-like protease                                                        |
| arCOG02210 | COG02244 | RfbX | R | Polysaccharide biosynthesis protein, Mvin family                                                |
| arCOG02214 | COG02244 | RfbX | R | Polysaccharide biosynthesis protein, Mvin family                                                |
| arCOG02238 | COG01342 | -    | R | Predicted DNA-binding protein                                                                   |
| arCOG02240 | COG01942 | -    | R | 4-oxalocrotonate tautomerase related protein                                                    |
| arCOG02284 | COG04880 | -    | R | Secreted protein containing C-terminal beta-propeller domain distantly related to WD-40 repeats |
| arCOG02292 | COG00546 | Gph  | R | HAD superfamily hydrolase                                                                       |
| arCOG02295 | COG01011 | -    | R | HAD superfamily hydrolase                                                                       |
| arCOG02303 | COG00496 | SurE | R | Predicted acid phosphatase                                                                      |
| arCOG02465 | COG01691 | -    | R | NCAIR mutase (PurE)-related protein                                                             |
| arCOG02578 | COG00655 | WrbA | R | Multimeric flavodoxin WrbA                                                                      |
| arCOG02579 | COG00727 | -    | R | Predicted Fe-S-cluster oxidoreductase                                                           |
| arCOG02584 | COG00727 | -    | R | Predicted Fe-S-cluster oxidoreductase                                                           |
| arCOG02603 | COG02018 | -    | R | Roadblock/LC7 domain                                                                            |
| arCOG02616 | COG00535 | -    | R | Radical SAM superfamily enzyme                                                                  |
| arCOG02742 | COG01721 | -    | R | Uncharacterized conserved protein, DUF58 family, contains vWF domain                            |
| arCOG02768 | COG01266 | -    | R | Metal-dependent membrane protease, CAAX family                                                  |
| arCOG02828 | COG03367 | -    | R | NAD dependent epimerase/dehydratase family                                                      |
| arCOG02902 | COG02304 | -    | R | Uncharacterized protein containing a von Willebrand factor type A (vWA) domain                  |
| arCOG02959 | COG02234 | lap  | R | Predicted aminopeptidase                                                                        |
| arCOG02986 | COG01268 | BioY | R | Uncharacterized conserved protein                                                               |
| arCOG02999 | COG01917 | -    | R | Cupin domain containing protein                                                                 |
| arCOG03045 | COG00457 | NrfG | R | TPR repeats containing protein                                                                  |
| arCOG03408 | COG01672 | -    | R | Predicted ATPase (AAA+ superfamily)                                                             |
| arCOG03409 |          |      | R | Predicted ATPase (AAA+ superfamily)                                                             |
| arCOG03450 |          |      | R | Predicted surface protease of transglutaminase family                                           |
| arCOG03509 | COG03291 | -    | R | Cell surface protein, containing PKD repeats                                                    |
| arCOG03647 | COG02388 | -    | R | Acetyltransferase (GNAT) family                                                                 |
| arCOG03723 |          |      | R | HEPN domain                                                                                     |
| arCOG04052 | COG04756 | -    | R | Predicted cation transporter                                                                    |
| arCOG04065 | COG00612 | PqqL | R | Predicted Zn-dependent peptidase                                                                |
| arCOG04159 | COG00714 | -    | R | MoxR-like ATPase                                                                                |
| arCOG04210 | COG00780 | -    | R | Enzyme related to GTP cyclohydrolase I                                                          |

|            |          |        |   |                                                                                      |
|------------|----------|--------|---|--------------------------------------------------------------------------------------|
| arCOG04212 | COG01661 | -      | R | Predicted DNA-binding protein with PD1-like DNA-binding motif                        |
| arCOG04215 | COG03375 | -      | R | Acetyltransferase (GNAT) family                                                      |
| arCOG04230 | COG03294 | -      | R | HD supefamily hydrolase                                                              |
| arCOG04278 | COG01679 | -      | R | Predicted aconitase                                                                  |
| arCOG04284 | COG01738 | yhhQ   | R | Uncharacterized member of the PurR regulon                                           |
| arCOG04297 | COG02401 | -      | R | ABC-type ATPase fused to a predicted acetyltransferase domain                        |
| arCOG04359 | COG02517 | -      | R | Predicted RNA-binding protein containing a C-terminal EMAP domain                    |
| arCOG04410 | COG01578 | -      | R | Predicted ATP-grasp domain fused to redox center                                     |
| arCOG05120 | COG05014 | -      | R | Radical SAM superfamily enzyme                                                       |
| arCOG05346 |          |        | R | PP-loop superfamily ATPase fused to Zn-finger domain                                 |
| arCOG05422 |          |        | R | Predicted ATPase                                                                     |
| arCOG05529 | COG02118 |        | R | DNA-binding TFAR19-related protein                                                   |
| arCOG05613 |          |        | R | Predicted DEAD-box helicase/ATPase                                                   |
| arCOG05666 | COG02908 | -      | R | Calcineurin-like phosphoesterase                                                     |
| arCOG06106 | COG02514 | -      | R | Predicted ring-cleavage extradiol dioxygenase                                        |
| arCOG06126 | COG01811 | -      | R | Uncharacterized membrane protein, possible Na <sup>+</sup> channel or pump           |
| arCOG06897 | COG03919 | -      | R | Predicted ATP-grasp enzyme                                                           |
| arCOG06982 |          |        | R | ABC-type ATPase                                                                      |
| arCOG07159 | COG00637 | -      | R | HAD superfamily hydrolase                                                            |
| arCOG07435 |          |        | R | HAD superfamily hydrolase                                                            |
| arCOG07448 | COG01719 |        | R | Predicted hydrocarbon binding protein, contains 4VR domain                           |
| arCOG07451 | COG04821 | -      | R | Uncharacterized protein containing SIS (Sugar ISomerase) phosphosugar binding domain |
| arCOG07466 | COG01266 | -      | R | Predicted metal-dependent membrane protease                                          |
| arCOG07858 | COG02244 | RfbX   | R | Polysaccharide biosynthesis protein, Mvin family                                     |
| arCOG07859 | COG01708 | -      | R | Minimal nucleotidyltransferase                                                       |
| arCOG08705 | COG02373 | -      | R | Large extracellular alpha-helical protein                                            |
| arCOG00022 |          |        | S | Uncharacterized conserved protein                                                    |
| arCOG00372 |          |        | S | Uncharacterized conserved protein                                                    |
| arCOG00379 |          |        | S | Uncharacterized conserved protein                                                    |
| arCOG00398 | COG02411 | -      | S | ASCH domain, predicted RNA-binding domain                                            |
| arCOG00491 |          |        | S | Uncharacterized conserved protein                                                    |
| arCOG00653 |          |        | S | Uncharacterized conserved protein                                                    |
| arCOG00899 | COG00392 | -      | S | Uncharacterized conserved membrane protein                                           |
| arCOG00908 | COG03286 | -      | S | Uncharacterized conserved protein                                                    |
| arCOG01048 |          |        | S | Uncharacterized conserved protein                                                    |
| arCOG01330 | COG02426 | -      | S | Predicted membrane protein                                                           |
| arCOG01466 |          |        | S | Uncharacterized conserved protein                                                    |
| arCOG01472 | COG02461 | -      | S | Hemerythrin HHE cation binding domain containing protein                             |
| arCOG01507 | COG04904 | -      | S | Uncharacterized conserved protein                                                    |
| arCOG01644 | COG02245 | -      | S | Predicted membrane protein                                                           |
| arCOG01724 | COG04072 | -      | S | Uncharacterized conserved protein                                                    |
| arCOG01734 | COG04933 | -      | S | Uncharacterized conserved protein                                                    |
| arCOG01766 | COG02430 | -      | S | Uncharacterized conserved protein                                                    |
| arCOG01994 | COG01300 | SpollM | S | Uncharacterized membrane protein                                                     |
| arCOG02024 | COG04881 | -      | S | Predicted membrane protein                                                           |
| arCOG02081 | COG01470 | -      | S | Predicted membrane protein                                                           |
| arCOG02087 | COG01470 | -      | S | Predicted membrane protein                                                           |
| arCOG02088 |          |        | S | Uncharacterized conserved protein                                                    |
| arCOG02109 | COG02445 | -      | S | HEPN domain containing protein                                                       |
| arCOG02123 | COG01895 | -      | S | HEPN domain containing protein                                                       |
| arCOG02216 |          |        | S | Uncharacterized conserved protein                                                    |
| arCOG02270 | COG05428 | -      | S | Uncharacterized conserved small protein                                              |
| arCOG02396 |          |        | S | Uncharacterized conserved protein                                                    |
| arCOG02487 |          |        | S | Cell suface protein                                                                  |
| arCOG02488 |          |        | S | Cell suface protein                                                                  |
| arCOG02499 | COG03420 |        | S | NosD-like periplasmic protein                                                        |



|            |          |   |   |                                                                                              |
|------------|----------|---|---|----------------------------------------------------------------------------------------------|
| arCOG02532 | COG03291 | - | S | beta-propeller repeat protein fused to CARDB-like adhesion domain                            |
| arCOG02545 | COG03291 | - | S | NosD-like periplasmic protein fused to PKD repeat domain                                     |
| arCOG02559 |          | - | S | Cell surface protein                                                                         |
| arCOG02701 | COG01641 | - | S | Uncharacterized conserved protein                                                            |
| arCOG02745 | COG01721 | - | S | Uncharacterized conserved protein, DUF58 family, contains vWF domain                         |
| arCOG02747 | COG01721 | - | S | Uncharacterized conserved protein, DUF58 family, contains vWF domain                         |
| arCOG03005 | COG04997 | - | S | Uncharacterized conserved protein, contains double-stranded beta-helix domain                |
| arCOG03188 |          | - | S | Uncharacterized conserved protein                                                            |
| arCOG03270 |          | - | S | Uncharacterized conserved protein, contains DUF11 domain                                     |
| arCOG03333 | COG04273 | - | S | DGC domain implicated in zinc binding                                                        |
| arCOG03349 | COG01633 | - | S | Ferritin-like domain                                                                         |
| arCOG03427 | COG02510 | - | S | Predicted membrane protein                                                                   |
| arCOG03442 |          | - | S | Uncharacterized conserved membrane protein                                                   |
| arCOG03511 | COG05306 | - | S | Uncharacterized conserved protein                                                            |
| arCOG03733 |          | - | S | Uncharacterized conserved protein                                                            |
| arCOG03754 |          | - | S | Uncharacterized conserved protein                                                            |
| arCOG03755 |          | - | S | paREP6 family protein                                                                        |
| arCOG03776 |          | - | S | Zn finger protein                                                                            |
| arCOG03777 |          | - | S | Zn finger protein                                                                            |
| arCOG03794 | COG03601 | - | S | Predicted membrane protein                                                                   |
| arCOG03829 |          | - | S | Uncharacterized conserved protein                                                            |
| arCOG03835 |          | - | S | Uncharacterized conserved membrane protein                                                   |
| arCOG03876 |          | - | S | Uncharacterized conserved protein                                                            |
| arCOG03877 |          | - | S | Uncharacterized conserved protein                                                            |
| arCOG03881 |          | - | S | Uncharacterized conserved protein                                                            |
| arCOG03889 | COG03465 | - | S | Uncharacterized conserved protein                                                            |
| arCOG03911 | COG03462 | - | S | Predicted membrane protein                                                                   |
| arCOG03942 |          | - | S | Uncharacterized conserved protein                                                            |
| arCOG04002 |          | - | S | Uncharacterized conserved protein                                                            |
| arCOG04008 |          | - | S | Uncharacterized conserved protein                                                            |
| arCOG04016 |          | - | S | Uncharacterized conserved protein                                                            |
| arCOG04024 |          | - | S | Uncharacterized conserved protein                                                            |
| arCOG04037 |          | - | S | Uncharacterized conserved protein                                                            |
| arCOG04058 | COG01872 | - | S | Uncharacterized conserved protein                                                            |
| arCOG04079 |          | - | S | Uncharacterized conserved protein                                                            |
| arCOG04085 | COG01649 | - | S | Uncharacterized protein conserved, contains glutamine amidotransferase (GATase1)-like domain |
| arCOG04189 | COG05625 | - | S | Membrane protein                                                                             |
| arCOG04264 |          | - | S | Uncharacterized conserved protein, predicted prefoldin                                       |
| arCOG04267 |          | - | S | Uncharacterized conserved protein                                                            |
| arCOG04275 |          | - | S | Uncharacterized conserved protein                                                            |
| arCOG04316 |          | - | S | Uncharacterized conserved protein                                                            |
| arCOG04317 | COG04732 | - | S | Predicted membrane protein                                                                   |
| arCOG04337 | COG01504 | - | S | Uncharacterized conserved protein                                                            |
| arCOG04344 | COG04818 | - | S | Predicted membrane protein                                                                   |
| arCOG04354 | COG01906 | - | S | Uncharacterized conserved protein                                                            |
| arCOG04374 | COG03804 | - | S | Uncharacterized conserved protein related to dihydrodipicolinate reductase                   |
| arCOG04437 | COG03863 | - | S | Uncharacterized distant relative of cell wall-associated hydrolase                           |
| arCOG04467 |          | - | S | Uncharacterized conserved protein                                                            |
| arCOG04477 | COG01860 | - | S | Uncharacterized conserved protein                                                            |
| arCOG04483 | COG04739 | - | S | Uncharacterized protein containing a ferredoxin domain                                       |
| arCOG04488 | COG02164 | - | S | Uncharacterized conserved protein                                                            |
| arCOG04609 |          | - | S | Predicted lipoprotein                                                                        |
| arCOG04705 | COG02098 | - | S | Uncharacterized conserved protein                                                            |
| arCOG04797 |          | - | S | Uncharacterized conserved protein                                                            |
| arCOG04807 | COG01297 | - | S | Predicted membrane protein                                                                   |
| arCOG04849 |          | - | S | Uncharacterized conserved protein                                                            |

|            |          |   |   |                                            |
|------------|----------|---|---|--------------------------------------------|
| arCOG04938 |          |   | S | Uncharacterized conserved protein          |
| arCOG04939 |          |   | S | Uncharacterized conserved protein          |
| arCOG05025 |          |   | S | Uncharacterized conserved protein          |
| arCOG05079 | COG01542 | - | S | Uncharacterized conserved protein          |
| arCOG05429 |          |   | S | Uncharacterized conserved protein          |
| arCOG05506 |          |   | S | Uncharacterized conserved protein          |
| arCOG05517 |          |   | S | Uncharacterized conserved protein          |
| arCOG05561 |          |   | S | Uncharacterized conserved protein          |
| arCOG05631 |          |   | S | Uncharacterized conserved protein          |
| arCOG05661 |          |   | S | Uncharacterized conserved protein          |
| arCOG05752 | COG04720 | - | S | Predicted membrane protein                 |
| arCOG06053 |          |   | S | Uncharacterized conserved protein          |
| arCOG06071 |          |   | S | Uncharacterized conserved protein          |
| arCOG06078 |          |   | S | Uncharacterized conserved protein          |
| arCOG06086 |          |   | S | Uncharacterized conserved protein          |
| arCOG06087 |          |   | S | Uncharacterized conserved protein          |
| arCOG06093 |          |   | S | Uncharacterized conserved protein          |
| arCOG06105 |          |   | S | Uncharacterized conserved protein          |
| arCOG06107 |          |   | S | Uncharacterized conserved protein          |
| arCOG06115 |          |   | S | Uncharacterized conserved protein          |
| arCOG06133 |          |   | S | Uncharacterized conserved protein          |
| arCOG06134 |          |   | S | Uncharacterized conserved protein          |
| arCOG06398 |          |   | S | Uncharacterized conserved protein          |
| arCOG06529 |          |   | S | Uncharacterized conserved protein          |
| arCOG06655 |          |   | S | Uncharacterized conserved protein          |
| arCOG06861 |          |   | S | Uncharacterized conserved protein          |
| arCOG06883 |          |   | S | Zn-ribbon domain containing protein        |
| arCOG06957 |          |   | S | Uncharacterized conserved protein          |
| arCOG06980 | COG03864 |   | S | vWFA domain containing protein             |
| arCOG06985 |          |   | S | Zn finger protein                          |
| arCOG06986 |          |   | S | Uncharacterized conserved protein          |
| arCOG07011 | COG03600 |   | S | Uncharacterized phage-associated protein   |
| arCOG07069 |          |   | S | Uncharacterized conserved protein          |
| arCOG07070 |          |   | S | Uncharacterized conserved protein          |
| arCOG07086 |          |   | S | Cell surface protein                       |
| arCOG07110 | COG05617 | - | S | Predicted integral membrane protein        |
| arCOG07425 |          |   | S | Uncharacterized conserved protein          |
| arCOG07427 |          |   | S | Uncharacterized conserved protein          |
| arCOG07428 |          |   | S | Uncharacterized conserved protein          |
| arCOG07430 | COG01814 | - | S | Uncharacterized membrane protein           |
| arCOG07453 |          |   | S | Uncharacterized conserved protein          |
| arCOG07455 |          |   | S | Uncharacterized conserved protein          |
| arCOG07458 |          |   | S | Uncharacterized conserved protein          |
| arCOG07460 |          |   | S | Uncharacterized conserved protein          |
| arCOG07465 |          |   | S | Uncharacterized conserved protein          |
| arCOG07487 | COG04708 | - | S | Predicted membrane protein                 |
| arCOG07488 |          |   | S | Uncharacterized conserved protein          |
| arCOG07489 |          |   | S | Uncharacterized conserved protein          |
| arCOG07491 |          |   | S | Uncharacterized conserved protein          |
| arCOG07492 |          |   | S | Uncharacterized conserved protein          |
| arCOG07510 |          |   | S | Uncharacterized conserved protein          |
|            |          |   |   | Uncharacterized conserved membrane protein |
| arCOG07571 |          |   | S | Uncharacterized conserved protein          |
| arCOG07626 |          |   | S | Uncharacterized conserved protein          |
| arCOG07632 |          |   | S | Uncharacterized conserved protein          |
| arCOG07678 |          |   | S | Uncharacterized conserved protein          |
| arCOG07690 |          |   | S | Uncharacterized conserved protein          |
| arCOG07703 |          |   | S | Uncharacterized conserved protein          |
| arCOG07746 |          |   | S | Uncharacterized conserved protein          |
| arCOG07750 |          |   | S | Uncharacterized conserved protein          |
| arCOG07752 |          |   | S | Uncharacterized conserved protein          |
| arCOG07753 |          |   | S | Uncharacterized conserved protein          |
| arCOG07756 |          |   | S | Uncharacterized conserved protein          |
| arCOG07757 |          |   | S | Uncharacterized conserved protein          |
| arCOG07758 |          |   | S | Uncharacterized conserved protein          |
| arCOG07831 |          |   | S | Uncharacterized conserved protein          |
| arCOG07843 |          |   | S | Uncharacterized conserved protein          |
| arCOG07865 |          |   | S | Uncharacterized conserved protein          |
| arCOG08060 |          |   | S | transmembrane protein                      |
| arCOG08088 |          |   | S | Uncharacterized conserved protein          |

|            |          |       |   |                                                              |
|------------|----------|-------|---|--------------------------------------------------------------|
| arCOG08215 |          |       | S | Uncharacterized conserved protein                            |
| arCOG08221 |          |       | S | Uncharacterized conserved protein                            |
| arCOG08303 | COG02880 | -     | S | Uncharacterized conserved protein                            |
| arCOG08358 |          |       | S | Uncharacterized conserved protein                            |
| arCOG08625 | COG01904 |       | S | Uncharacterized conserved protein                            |
| arCOG08629 | COG03395 | -     | S | Uncharacterized conserved protein                            |
| arCOG08832 |          |       | S | Uncharacterized conserved protein                            |
| arCOG08858 |          |       | S | Uncharacterized conserved protein                            |
| arCOG08872 |          |       | S | Uncharacterized conserved protein                            |
| arCOG09389 |          |       | S | Uncharacterized conserved protein                            |
| arCOG09422 | COG04720 |       | S | Predicted membrane protein                                   |
| arCOG09424 |          |       | S | Uncharacterized conserved protein                            |
| arCOG09425 |          |       | S | Uncharacterized conserved protein                            |
| arCOG09426 |          |       | S | Uncharacterized conserved membrane protein                   |
| arCOG09429 |          |       | S | Uncharacterized conserved protein                            |
| arCOG09431 |          |       | S | Uncharacterized conserved protein                            |
| arCOG09435 |          |       | S | Uncharacterized conserved membrane protein                   |
| arCOG09748 |          |       | S | Uncharacterized conserved protein                            |
| arCOG09797 |          |       | S | Uncharacterized conserved protein                            |
| arCOG09808 |          |       | S | Uncharacterized conserved protein                            |
| arCOG09847 |          |       | S | Uncharacterized conserved protein                            |
| arCOG09922 |          |       | S | Uncharacterized conserved protein                            |
| arCOG10126 | COG01422 |       | S | Uncharacterized conserved protein                            |
| arCOG10149 |          |       | S | Uncharacterized conserved protein                            |
| arCOG10150 |          |       | S | Uncharacterized conserved protein                            |
| arCOG10161 |          |       | S | Uncharacterized conserved protein                            |
| arCOG10167 |          |       | S | Uncharacterized conserved protein                            |
| arCOG10177 |          |       | S | Uncharacterized conserved protein                            |
| arCOG10276 |          |       | S | Uncharacterized conserved protein                            |
| arCOG10286 |          |       | S | Uncharacterized conserved protein                            |
| arCOG10288 |          |       | S | Uncharacterized conserved protein                            |
| arCOG10417 |          |       | S | Uncharacterized conserved protein                            |
| arCOG10423 |          |       | S | Uncharacterized conserved protein                            |
| arCOG10428 |          |       | S | Uncharacterized conserved protein                            |
| arCOG10481 |          |       | S | Uncharacterized conserved protein                            |
| arCOG10611 |          |       | S | Uncharacterized conserved protein                            |
| arCOG10656 |          |       | S | Uncharacterized conserved protein                            |
| arCOG10860 |          |       | S | Uncharacterized conserved protein                            |
| arCOG10867 |          |       | S | Uncharacterized conserved protein                            |
| arCOG10888 |          |       | S | Uncharacterized conserved protein                            |
| arCOG10919 |          |       | S | Uncharacterized conserved protein                            |
| arCOG10940 |          |       | S | Uncharacterized conserved protein                            |
| arCOG10989 |          |       | S | Uncharacterized conserved protein                            |
| arCOG10990 |          |       | S | Uncharacterized conserved protein                            |
| arCOG11052 |          |       | S | Uncharacterized conserved protein                            |
| arCOG11053 |          |       | S | Uncharacterized conserved protein                            |
| arCOG11063 |          |       | S | Uncharacterized conserved protein                            |
| arCOG11224 |          |       | S | Uncharacterized conserved protein                            |
| arCOG11225 |          |       | S | Uncharacterized conserved protein                            |
| arCOG11243 |          |       | S | Uncharacterized conserved protein                            |
| arCOG11244 |          |       | S | Uncharacterized conserved protein                            |
| arCOG00449 | COG00589 | UspA  | T | Nucleotide-binding protein, UspA family                      |
| arCOG01174 | COG00467 | RAD55 | T | RecA-superfamily ATPase implicated in signal transduction    |
| arCOG01694 | COG01716 | -     | T | FHA domain and HTH domain                                    |
| arCOG04078 | COG02346 |       | T | Globin-like domain                                           |
| arCOG05302 | COG00631 | PTC1  | T | Serine/threonine protein phosphatase                         |
| arCOG03383 | COG00823 | ToIB  | U | Periplasmic component of the Tol biopolymer transport system |
| arCOG00710 | COG01848 | -     | V | PIN domain containing protein                                |
| arCOG00711 | COG01848 | -     | V | PIN domain containing protein                                |
| arCOG00717 | COG02405 | -     | V | PIN domain containing protein                                |
| arCOG00719 | COG02405 | -     | V | PIN domain containing protein                                |
| arCOG00720 | COG01458 | -     | V | PIN domain containing protein                                |
| arCOG00722 | COG02886 | -     | V | Predicted antitoxins containing the HTH domain               |
| arCOG00730 | COG01848 | -     | V | PIN domain containing protein                                |

|            |          |           |   |                                                                              |
|------------|----------|-----------|---|------------------------------------------------------------------------------|
| arCOG01437 | COG05551 | Cas6      | V | CRISPR system related protein, RAMP superfamily Cas6 group                   |
| arCOG01441 |          | Cas8a2    | V | CRISPR system related protein, large subunit of CASCADE complex              |
| arCOG01731 | COG00534 | NorM      | V | Na <sup>+</sup> -driven multidrug efflux pump                                |
| arCOG02121 | COG05378 | -         | V | PIN domain containing protein                                                |
| arCOG02224 | COG01487 | VapC      | V | PIN domain containing protein                                                |
| arCOG02672 | COG01688 | Cas5      | V | CRISPR system related protein Cas5, RAMP superfamily                         |
| arCOG03222 | COG01567 | Cas5/Csm4 | V | CRISPR system related protein, RAMP superfamily Cas5 group                   |
| arCOG03223 | COG01567 | Cas5/Csm4 | V | CRISPR system related protein, RAMP superfamily Cas5 group                   |
| arCOG03435 | COG01517 | -         | V | CRISPR system related protein, COG1517 family                                |
| arCOG03521 | COG01002 | -         | V | Type II restriction enzyme, methylase subunit                                |
| arCOG03590 |          |           | V | Addiction module toxin, Txe/YoeB family                                      |
| arCOG03718 | COG01332 | Cas7/Csm5 | V | CRISPR system related protein, RAMP superfamily Cas7 group                   |
| arCOG03719 | COG01332 | Cas7/Csm5 | V | CRISPR system related protein, RAMP superfamily Cas7 group                   |
| arCOG03788 | COG05608 |           | V | LEA14-like desiccation related protein                                       |
| arCOG03886 |          |           | V | CopG family DNA-binding protein                                              |
| arCOG04193 |          |           | V | CRISPR system associated protein, predicted small subunit of CASCADE complex |
| arCOG05297 | COG02402 | -         | V | PIN domain containing protein                                                |
| arCOG05724 | COG02810 | -         | V | Predicted type IV restriction endonuclease                                   |
| arCOG06143 |          |           | V | CRISPR system associated protein, predicted small subunit of CASCADE complex |
| arCOG06144 |          | Cas8a2    | V | CRISPR system related protein, large subunit of CASCADE complex              |
| arCOG06987 |          |           | V | CopG-family DNA-binding protein                                              |
| arCOG07131 | COG01131 | CcmA      | V | ABC-type multidrug transport system, ATPase component                        |
| arCOG07514 |          |           | V | RHH/CopG family DNA-binding protein                                          |
| arCOG07641 | COG01517 |           | V | CRISPR system related protein, COG1517 family                                |
| arCOG07759 | COG01487 | VapC      | V | PIN domain containing protein                                                |
| arCOG07904 | COG04634 |           | V | PIN domain                                                                   |
| arCOG08616 |          |           | V | Ribbon-helix-helix protein, copG family                                      |
| arCOG08881 |          |           | V | Ribbon-helix-helix protein, copG family                                      |
| arCOG10147 |          |           | V | CRISPR-associated endonuclease Cas6                                          |

#### Gain inAcd1

|            |          |      |   |                                                                                                         |
|------------|----------|------|---|---------------------------------------------------------------------------------------------------------|
| arCOG06057 |          |      | C | Membrane-bound NiFe hydrogenase subunit                                                                 |
| arCOG00834 | COG00454 | WecD | K | Acetyltransferase (GNAT) family                                                                         |
| arCOG01242 | COG00582 | XerC | L | Integrase                                                                                               |
| arCOG01373 | COG01089 | Gmd  | M | GDP-D-mannose dehydratase                                                                               |
| arCOG01955 | COG00475 | KefB | P | Kef-type K <sup>+</sup> transport system, membrane component fused TrkA K <sup>+</sup> transport system |
| arCOG06513 | COG05485 | -    | R | Predicted ester cyclase                                                                                 |
| arCOG07416 | COG00596 | MhpC | R | Alpha/beta superfamily hydrolase                                                                        |
| arCOG05099 | COG02105 |      | S | AIG2-like family protein                                                                                |
| arCOG06076 |          |      | S | Uncharacterized conserved protein                                                                       |
| arCOG07199 |          |      | S | Uncharacterized conserved protein                                                                       |
| arCOG07226 |          |      | S | Uncharacterized conserved protein                                                                       |
| arCOG07348 |          |      | S | Uncharacterized conserved protein                                                                       |
| arCOG07536 | COG03055 | -    | S | Uncharacterized conserved protein                                                                       |
| arCOG08456 |          |      | S | Uncharacterized conserved protein                                                                       |
| arCOG09897 |          |      | S | Uncharacterized conserved protein                                                                       |
| arCOG10353 |          |      | S | Uncharacterized conserved protein                                                                       |
| arCOG10437 |          |      | S | Uncharacterized conserved protein                                                                       |
| arCOG11297 |          |      | S | Uncharacterized conserved protein                                                                       |
| arCOG07245 |          |      | S | Uncharacterized conserved protein                                                                       |
| arCOG02782 | COG01787 | -    | V | Endonuclease, HJR/Mrr/RecB family                                                                       |

#### Loss in Acd1

|            |          |      |   |                 |
|------------|----------|------|---|-----------------|
| arCOG00024 | COG00554 | GlpK | C | Glycerol kinase |
|------------|----------|------|---|-----------------|

|            |          |          |   |                                                                                                                      |
|------------|----------|----------|---|----------------------------------------------------------------------------------------------------------------------|
| arCOG00246 | COG00039 | Mdh      | C | Malate/lactate dehydrogenase                                                                                         |
| arCOG00446 | COG02086 | FixA     | C | Electron transfer flavoprotein, beta subunit                                                                         |
| arCOG00447 | COG02025 | FixB     | C | Electron transfer flavoprotein, alpha subunit                                                                        |
| arCOG00701 | COG00584 | UgpQ     | C | Glycerophosphoryl diester phosphodiesterase                                                                          |
| arCOG00959 | COG01146 | -        | C | Ferredoxin                                                                                                           |
| arCOG00984 | COG01454 | EutG     | C | Alcohol dehydrogenase, class IV                                                                                      |
| arCOG01004 | COG02421 | -        | C | Predicted acetamidase/formamidase                                                                                    |
| arCOG01052 | COG00022 | AcoB     | C | Pyruvate/2-oxoglutarate/acetoin dehydrogenase complex, dehydrogenase (E1) component                                  |
| arCOG01054 | COG01071 | AcoA     | C | Pyruvate/2-oxoglutarate/acetoin dehydrogenase complex, dehydrogenase (E1) component, eukaryotic type, alpha subunit  |
| arCOG01067 | COG01252 | Ndh      | C | NADH dehydrogenase, FAD-containing subunit                                                                           |
| arCOG01235 | COG01622 | CyoA     | C | Heme/copper-type cytochrome/quinol oxidase, subunit 2                                                                |
| arCOG01236 | COG01622 | CyoA     | C | Heme/copper-type cytochrome/quinol oxidase, subunit 2                                                                |
| arCOG01237 | COG00843 | CyoB     | C | Heme/copper-type cytochrome/quinol oxidase, subunit 1 and 3                                                          |
| arCOG01356 | COG01032 | -        | C | Radical SAM superfamily enzyme                                                                                       |
| arCOG01458 | COG00604 | Qor      | C | NADPH:quinone reductase or related Zn-dependent oxidoreductase                                                       |
| arCOG01495 | COG00243 | BisC     | C | Molybdopterin oxidoreductase                                                                                         |
| arCOG01503 | COG00437 | HybA     | C | Fe-S-cluster-containing dehydrogenase component                                                                      |
| arCOG01602 | COG01014 | PorG     | C | Pyruvate:ferredoxin oxidoreductase or related 2-oxoacid:ferredoxin oxidoreductase, gamma subunit                     |
| arCOG01604 | COG01144 | -        | C | Pyruvate:ferredoxin oxidoreductase or related 2-oxoacid:ferredoxin oxidoreductase, gamma and delta subunit           |
| arCOG01609 | COG04231 | -        | C | Indolepyruvate ferredoxin oxidoreductase, alpha and beta subunit                                                     |
| arCOG01706 | COG00508 | AceF     | C | Pyruvate/2-oxoglutarate dehydrogenase complex, dihydrolipoamide acyltransferase (E2) component or related enzyme     |
| arCOG01984 | COG02440 | FixX     | C | Ferredoxin-like protein                                                                                              |
| arCOG02026 | COG05557 | -        | C | Polysulphide reductase                                                                                               |
| arCOG02236 | COG01148 | HdrA     | C | Heterodisulfide reductase, subunit A or related polyferredoxin                                                       |
| arCOG02244 | COG02009 | SdhC     | C | Succinate dehydrogenase/fumarate reductase, cytochrome b subunit                                                     |
| arCOG02304 | COG01804 | Mct/CaiB | C | Succinyl-CoA:mesaconate CoA-transferase or predicted acyl-CoA transferase/carnitine dehydratase or                   |
| arCOG02700 | COG00508 | AceF     | C | Pyruvate/2-oxoglutarate dehydrogenase complex, dihydrolipoamide acyltransferase (E2) component (C-terminal fragment) |
| arCOG02772 | COG00348 | NapH     | C | Polyferredoxin                                                                                                       |
| arCOG04358 | COG01526 | FdhD     | C | Uncharacterized protein required for formate dehydrogenase activity                                                  |
| arCOG04386 | COG01620 | LldP     | C | L-lactate permease                                                                                                   |
| arCOG04874 | COG02055 | -        | C | Malate/L-lactate dehydrogenase                                                                                       |
| arCOG05498 | COG02225 | AceB     | C | Malate synthase                                                                                                      |
| arCOG05636 | COG02864 | -        | C | Formate dehydrogenase, cytochrome b556 subunit                                                                       |
| arCOG05865 | COG01274 | PckA     | C | Phosphoenolpyruvate carboxykinase (GTP)                                                                              |
| arCOG06033 | COG01274 | -        | C | Predicted subunit of heme/copper-type cytochrome/quinol oxidase                                                      |
| arCOG02235 | COG01148 | HdrA     | C | Heterodisulfide reductase, subunit A or related polyferredoxin                                                       |
| arCOG00177 | COG03842 | PotA     | E | ABC-type spermidine/putrescine transport system, ATPase component                                                    |
| arCOG00182 | COG00444 | DppD     | E | ABC-type dipeptide/oligopeptide/nickel transport system, ATPase component                                            |
| arCOG00204 | COG04608 | AppF     | E | ABC-type oligopeptide transport system, ATPase component                                                             |
| arCOG00455 | COG00345 | ProC     | E | Pyrrroline-5-carboxylate reductase                                                                                   |

|            |          |      |   |                                                                                           |
|------------|----------|------|---|-------------------------------------------------------------------------------------------|
| arCOG00748 | COG01173 | DppC | E | ABC-type dipeptide/oligopeptide/nickel transport system, permease component               |
| arCOG00915 | COG00160 | GabT | E | 4-aminobutyrate aminotransferase or related aminotransferase                              |
| arCOG00924 | COG00410 | LivF | E | ABC-type branched-chain amino acid transport system, ATPase component                     |
| arCOG00925 | COG00411 | LivG | E | ABC-type branched-chain amino acid transport system, ATPase component                     |
| arCOG01021 | COG00683 | LivK | E | ABC-type branched-chain amino acid transport system, periplasmic component                |
| arCOG01269 | COG00559 | LivH | E | Branched-chain amino acid ABC-type transport system, permease component                   |
| arCOG01273 | COG04177 | LivM | E | ABC-type branched-chain amino acid transport system, permease component                   |
| arCOG01292 | COG00493 | GltD | E | NADPH-dependent glutamate synthase beta chain or related oxidoreductase                   |
| arCOG01511 | COG00145 | HyuA | E | N-methylhydantoinase A/acetone carboxylase, beta subunit                                  |
| arCOG01512 | COG00146 | HyuB | E | N-methylhydantoinase B/acetone carboxylase, alpha subunit                                 |
| arCOG01533 | COG00747 | DdpA | E | ABC-type transport system, periplasmic component                                          |
| arCOG01534 | COG00747 | DdpA | E | ABC-type transport system, periplasmic component                                          |
| arCOG01535 | COG00747 | DdpA | E | ABC-type transport system, periplasmic component                                          |
| arCOG02165 | COG01305 | -    | E | Transglutaminase-like enzyme, putative cysteine protease                                  |
| arCOG02462 | COG01878 | -    | E | Kynurenine formamidase                                                                    |
| arCOG03462 | COG00531 | PotE | E | Amino acid transporter                                                                    |
| arCOG03466 | COG00531 | PotE | E | Amino acid transporter                                                                    |
| arCOG03650 | COG00531 | PotE | E | Amino acid transporter                                                                    |
| arCOG03651 | COG00531 | PotE | E | Amino acid transporter                                                                    |
| arCOG03673 |          |      | E | Thermopsin-like protease                                                                  |
| arCOG04029 | COG05550 |      | E | Pepsin-like aspartate protease                                                            |
| arCOG04083 | COG02355 | -    | E | Zn-dependent dipeptidase, microsomal dipeptidase homolog                                  |
| arCOG04333 | COG00436 | -    | E | Aspartate/tyrosine/aromatic aminotransferase                                              |
| arCOG05121 | COG02755 | TesA | E | Lysophospholipase L1 or related esterase                                                  |
| arCOG03447 | COG01457 | CodB | F | Purine-cytosine permease or related protein                                               |
| arCOG03448 | COG01953 | FU1  | F | Cytosine/uracil/thiamine/allantoin permease                                               |
| arCOG03714 | COG01328 | NrdD | F | ATP cone domain                                                                           |
| arCOG04128 | COG00035 | Upp  | F | Uracil phosphoribosyltransferase                                                          |
| arCOG04173 | COG00295 | Cdd  | F | Cytidine deaminase                                                                        |
| arCOG05252 | COG04741 | -    | F | Predicted secreted endonuclease distantly related to archaeal Holliday junction resolvase |
| arCOG00025 | COG01070 | XylB | G | Sugar (pentulose and hexulose) kinase                                                     |
| arCOG00150 | COG01653 | UgpB | G | ABC-type sugar transport system, periplasmic component                                    |
| arCOG00153 | COG01653 | UgpB | G | ABC-type trehalose transport system, periplasmic component                                |
| arCOG00154 | COG02182 | MalE | G | Maltose-binding periplasmic protein                                                       |
| arCOG00156 | COG01653 | UgpB | G | ABC-type sugar transport system, periplasmic component                                    |
| arCOG00157 | COG01175 | UgpA | G | ABC-type sugar transport system, permease component                                       |
| arCOG00158 | COG00395 | UgpE | G | ABC-type sugar transport system, permease component                                       |
| arCOG00159 | COG00395 | UgpE | G | ABC-type sugar transport system, permease component                                       |
| arCOG00160 | COG03833 | MalG | G | ABC-type maltose transport system, permease component                                     |
| arCOG00175 | COG03839 | MalK | G | ABC-type sugar transport system, ATPase component                                         |
| arCOG00263 | COG01172 | AraH | G | Ribose/xylose/arabinose/galactoside ABC-type transport system, permease component         |
| arCOG00581 | COG02513 | PrpB | G | PEP phosphonmutase or related enzyme                                                      |

|            |          |          |   |                                                                                                   |
|------------|----------|----------|---|---------------------------------------------------------------------------------------------------|
| arCOG00699 | COG01820 | NagA     | G | N-acetylglucosamine-6-phosphate deacetylase                                                       |
| arCOG00760 | COG02301 | Mcl/CitE | G | Beta-methylmalyl-CoA lyase (Citrate lyase beta subunit family)                                    |
| arCOG01114 | COG00574 | PpsA     | G | Phosphoenolpyruvate synthase/pyruvate phosphate dikinase                                          |
| arCOG02685 | COG00477 | ProP     | G | Permease of the major facilitator superfamily                                                     |
| arCOG02688 | COG00477 | ProP     | G | Permease of the major facilitator superfamily                                                     |
| arCOG02792 | COG00477 | ProP     | G | Permease of the major facilitator superfamily                                                     |
| arCOG03284 | COG01449 | -        | G | Glycosyl hydrolase family 57                                                                      |
| arCOG03661 | COG00383 | AMS1     | G | Alpha-mannosidase                                                                                 |
| arCOG03663 | COG01501 | -        | G | Alpha-glucosidase, family 31 of glycosyl hydrolase                                                |
| arCOG03858 |          |          | G | Glycosyl hydrolase family 12                                                                      |
| arCOG03863 | COG04354 | -        | G | Predicted bile acid beta-glucosidase                                                              |
| arCOG03867 | COG04354 | -        | G | Predicted bile acid beta-glucosidase                                                              |
| arCOG04120 | COG00469 | PykF     | G | Pyruvate kinase                                                                                   |
| arCOG04634 | COG01472 | BglX     | G | Bifunctional b-D-xylosidase/a-L-arabinosidase or related glycosidase                              |
| arCOG05317 | COG02721 | UxaA     | G | Altronate dehydratase                                                                             |
| arCOG05318 | COG02721 |          | G | SAF domain, altronate dehydratase related                                                         |
| arCOG05341 | COG00477 | ProP     | G | Permease of the major facilitator superfamily                                                     |
| arCOG05361 | COG02017 | GalM     | G | Galactose mutarotase or related enzyme                                                            |
| arCOG05411 | COG03934 | -        | G | Endo-beta-mannanase                                                                               |
| arCOG05412 | COG02723 | BglB     | G | Beta-glucosidase/6-phospho-beta-glucosidase/beta-galactosidase                                    |
| arCOG06049 | COG03345 |          | G | Alpha-galactosidase                                                                               |
| arCOG07337 | COG03250 | LacZ     | G | Beta-galactosidase/beta-glucuronidase                                                             |
| arCOG07338 | COG03669 | -        | G | Alpha-L-fucosidase                                                                                |
| arCOG07728 | COG01879 | RbsB     | G | ABC-type sugar transport system, periplasmic component, contains N-terminal xre family HTH domain |
| arCOG00217 | COG00303 | MoeA     | H | Molybdopterin biosynthesis enzyme                                                                 |
| arCOG00660 | COG00320 | LipA     | H | Lipoate synthase                                                                                  |
| arCOG01870 | COG01865 | cbiZ     | H | Adenosylcobinamide amidohydrolase                                                                 |
| arCOG02620 | COG01541 | PaaK     | H | Coenzyme F390 synthetase                                                                          |
| arCOG02939 | COG02154 | -        | H | Pterin-4a-carbinolamine dehydratase                                                               |
| arCOG00239 | COG01024 | CaiD     | I | Enoyl-CoA hydratase/carnithine racemase                                                           |
| arCOG00774 | COG02030 | Mch      | I | Mesaconyl-CoA hydratase (Acyl dehydratase family)                                                 |
| arCOG00856 | COG00318 | CaiC     | I | Acyl-CoA synthetase (AMP-forming)/AMP-acid ligase II                                              |
| arCOG00860 | COG01608 | -        | I | Isopentenyl phosphate kinase, enzyme of modified mevalonate pathway                               |
| arCOG01259 | COG01028 | FabG     | I | Short-chain alcohol dehydrogenase                                                                 |
| arCOG01279 | COG00183 | PaaJ     | I | Acetyl-CoA acetyltransferase                                                                      |
| arCOG01280 | COG00183 | PaaJ     | I | Acetyl-CoA acetyltransferase                                                                      |
| arCOG01842 | COG03255 | -        | I | Putative sterol carrier protein                                                                   |
| arCOG01987 | COG01788 | AtoD     | I | Acyl CoA:acetate/3-ketoacid CoA transferase, alpha subunit                                        |
| arCOG02638 | COG00657 | Aes      | I | Esterase/lipase                                                                                   |
| arCOG03056 | COG00671 | PgpB     | I | Membrane-associated phospholipid phosphatase                                                      |
| arCOG04100 | COG01960 | CaiA     | I | Acyl-CoA dehydrogenase                                                                            |
| arCOG04201 | COG00365 | Acs      | I | Acyl-coenzyme A synthetase/AMP-(fatty) acid ligase                                                |
| arCOG04310 | COG01960 | CaiA     | I | Acyl-CoA dehydrogenase                                                                            |
| arCOG04350 | COG01960 | CaiA     | I | Acyl-CoA dehydrogenase                                                                            |
| arCOG05316 | COG02057 | AtoA     | I | Acyl CoA:acetate/3-ketoacid CoA transferase, beta subunit                                         |
| arCOG06112 | COG00365 | Acs      | I | Acyl-coenzyme A synthetase/AMP-(fatty) acid ligase                                                |
| arCOG07204 | COG02267 | PldB     | I | Lysophospholipase, alpha-beta hydrolase superfamily                                               |
| arCOG07315 | COG01502 |          | I | Phospholipase D/Transphosphatidylase                                                              |
| arCOG00995 | COG01549 | -        | J | Queuine tRNA-ribosyltransferase related protein                                                   |

|            |          |        |   |                                                                                          |
|------------|----------|--------|---|------------------------------------------------------------------------------------------|
| arCOG00996 | COG00343 | Tgt    | J | Queuine/archaeosine tRNA-ribosyltransferase                                              |
| arCOG01013 | COG04352 | -      | J | Ribosomal protein L13E                                                                   |
| arCOG04168 | COG02174 | RPL34A | J | Ribosomal protein L34E                                                                   |
| arCOG00001 | COG01695 | -      | K | Predicted transcriptional regulator, PadR family                                         |
| arCOG00374 | COG02512 | -      | K | Predicted membrane-associated transcriptional regulator                                  |
| arCOG00394 | COG00640 | ArsR   | K | Transcriptional regulator containing HTH domain, ArsR family                             |
| arCOG00608 | COG03620 | -      | K | Predicted transcriptional regulator with C-terminal CBS domains                          |
| arCOG00732 | COG01846 | MarR   | K | Transcriptional regulator, MarR family                                                   |
| arCOG00816 | COG02002 | AbrB   | K | Transcriptional regulator AbrB                                                           |
| arCOG00818 | COG02002 | AbrB   | K | Transcriptional regulator AbrB                                                           |
| arCOG00820 | COG02002 | AbrB   | K | Transcriptional regulator AbrB                                                           |
| arCOG00825 | COG02002 | AbrB   | K | Transcriptional regulator AbrB                                                           |
| arCOG00826 | COG00454 | WecD   | K | Acetyltransferase (GNAT) family                                                          |
| arCOG00877 | COG01061 | SSL2   | K | DNA or RNA helicase of superfamily II                                                    |
| arCOG01057 | COG01733 | -      | K | Predicted transcriptional regulator                                                      |
| arCOG01128 | COG00819 | TenA   | K | Transcriptional activator TenA                                                           |
| arCOG01129 | COG00819 | TenA   | K | Transcriptional activator TenA                                                           |
| arCOG01361 | COG01243 | ELP3   | K | Histone acetyltransferase                                                                |
| arCOG01665 | COG02026 | RelE   | K | Cytotoxic translational repressor of toxin-antitoxin stability system                    |
| arCOG01681 | COG00640 | ArsR   | K | Transcriptional regulator containing HTH domain, ArsR family                             |
| arCOG01804 | COG03888 | -      | K | Predicted transcriptional regulator                                                      |
| arCOG02217 |          |        | K | Predicted antitoxin associated with PIN domain                                           |
| arCOG02272 | COG03413 | -      | K | Predicted transcriptional regulator, C-terminal HTH-like domain                          |
| arCOG03358 | COG03355 | -      | K | Predicted transcriptional regulator                                                      |
| arCOG03748 | COG01846 | MarR   | K | Transcriptional regulator, MarR family                                                   |
| arCOG03859 | COG00640 | ArsR   | K | Transcriptional regulator containing HTH domain, ArsR family                             |
| arCOG04056 | COG00640 | ArsR   | K | Transcriptional regulator containing HTH domain, ArsR family                             |
| arCOG04248 | COG00846 | SIR2   | K | NAD-dependent protein deacetylase, SIR2 family                                           |
| arCOG04362 | COG04742 | -      | K | Predicted transcriptional regulator                                                      |
| arCOG05969 | COG03355 | -      | K | Predicted transcriptional regulator                                                      |
| arCOG06044 | COG01802 | GntR   | K | Transcriptional regulators                                                               |
| arCOG00115 | COG00863 | -      | L | DNA modification methylase                                                               |
| arCOG00558 | COG00513 | SrmB   | L | Superfamily II DNA and RNA helicase                                                      |
| arCOG00890 | COG00863 | -      | L | DNA modification methylase                                                               |
| arCOG01244 | COG04342 | -      | L | Integrase/Recombinase                                                                    |
| arCOG01247 | COG04974 | XerD   | L | Site-specific recombinase XerD                                                           |
| arCOG01290 | COG01533 | SplB   | L | DNA repair photolyase                                                                    |
| arCOG01304 | COG01637 | NucS   | L | RecB family endonuclease acting on branched DNA substrates                               |
| arCOG01442 | COG02254 | -      | L | HD superfamily nuclease                                                                  |
| arCOG01443 | COG02254 | Cas3'' | L | HD superfamily nuclease                                                                  |
| arCOG02129 | COG03335 | -      | L | Transposase                                                                              |
| arCOG02759 | COG01943 | -      | L | Transposase                                                                              |
| arCOG02942 | COG00328 | RnhA   | L | Ribonuclease HI                                                                          |
| arCOG03162 | COG01961 | PinR   | L | Site-specific recombinase, DNA invertase Pin homolog                                     |
| arCOG04032 |          |        | L | Eukaryotic-type DNA primase, catalytic (small) subunit homolog, fused to HTH domain      |
| arCOG04356 | COG03372 | Bax1   | L | Nuclease of restriction endonuclease-like fold, implicated in nucleotide excision repair |
| arCOG07735 |          |        | L | HNH superfamily endonuclease                                                             |
| arCOG08402 |          |        | L | Transposase DNA-binding domain                                                           |
| arCOG00059 | COG02222 | AgaS   | M | Predicted phosphosugar isomerase                                                         |
| arCOG00253 | COG01004 | Ugd    | M | Predicted UDP-glucose 6-dehydrogenase                                                    |
| arCOG00665 | COG01210 | GalU   | M | UDP-glucose pyrophosphorylase                                                            |
| arCOG00894 | COG00463 | WcaA   | M | Glycosyltransferase                                                                      |
| arCOG01168 | COG04948 | -      | M | L-alanine-DL-glutamate epimerase or related enzyme of enolase superfamily                |



|            |          |        |   |                                                                                                                |
|------------|----------|--------|---|----------------------------------------------------------------------------------------------------------------|
| arCOG01381 | COG00463 | WcaA   | M | Glycosyltransferase                                                                                            |
| arCOG01398 | COG00463 | WcaA   | M | Glycosyltransferase                                                                                            |
| arCOG01403 | COG00438 | RfaG   | M | Glycosyltransferase                                                                                            |
| arCOG01407 | COG00438 | RfaG   | M | Glycosyltransferase                                                                                            |
| arCOG01408 | COG00438 | RfaG   | M | Glycosyltransferase                                                                                            |
| arCOG01409 | COG00438 | RfaG   | M | Glycosyltransferase                                                                                            |
| arCOG01417 | COG00438 | RfaG   | M | Glycosyltransferase                                                                                            |
| arCOG07240 | COG00463 | WcaA   | M | Glycosyltransferase                                                                                            |
| arCOG07450 |          |        | M | O-Glycosyl hydrolase family 16                                                                                 |
| arCOG01809 | COG01955 | FlaJ   | N | Archaeal flagella assembly protein J                                                                           |
| arCOG01822 | COG03354 | FlaG   | N | Putative archaeal flagellar protein G                                                                          |
| arCOG01824 | COG03353 | FlaF   | N | Putative archaeal flagellar protein F                                                                          |
| arCOG01829 | COG01681 | FlaB   | N | Archaeal flagellins                                                                                            |
| arCOG03872 |          |        | N | Flagellar protein G                                                                                            |
| arCOG04148 | COG02874 | FlaH   | N | Predicted ATPase involved in biogenesis of archaeal flagella                                                   |
| arCOG01231 | COG00378 | HypB   | O | Ni <sup>2+</sup> -binding GTPase involved in regulation of expression and maturation of urease and hydrogenase |
| arCOG01333 | COG00501 | HtpX   | O | Zn-dependent protease with chaperone function                                                                  |
| arCOG01334 | COG00501 | HtpX   | O | Zn-dependent protease with chaperone function                                                                  |
| arCOG01910 | COG01030 | NfeD   | O | Short-chain alcohol dehydrogenase                                                                              |
| arCOG01912 | COG01585 | -      | O | Membrane protein implicated in regulation of membrane protease activity                                        |
| arCOG01915 | COG00330 | HflC   | O | Membrane protease subunit, stomatin/prohibitin homolog                                                         |
| arCOG02833 | COG00265 | DegQ   | O | Serine protease Do (heat-shock protein)                                                                        |
| arCOG03580 | COG02020 | STE14  | O | Putative protein-S-isoprenylcysteine methyltransferase                                                         |
| arCOG03743 | COG05550 | -      | O | Predicted aspartyl protease                                                                                    |
| arCOG04028 | COG05550 | -      | O | Predicted aspartyl protease                                                                                    |
| arCOG04236 | COG00396 | sufC   | O | Cysteine desulfurase activator ATPase                                                                          |
| arCOG05850 | COG02039 | Pcp    | O | Pyrrolidone-carboxylate peptidase (N-terminal pyroglutamyl peptidase)                                          |
| arCOG07052 | COG00425 |        | O | Predicted redox protein, regulator of disulfide bond formation                                                 |
| arCOG00188 | COG01122 | CbiO   | P | ABC-type cobalt transport system, ATPase component                                                             |
| arCOG00576 | COG00428 | -      | P | Predicted divalent heavy-metal cations transporter                                                             |
| arCOG00625 | COG02239 | MgtE   | P | Mg/Co/Ni transporter MgtE (contains CBS domain)                                                                |
| arCOG01477 | COG01230 | CzcD   | P | Co/Zn/Cd efflux system component                                                                               |
| arCOG01478 | COG00053 | MMT1   | P | Predicted Co/Zn/Cd cation transporter                                                                          |
| arCOG01585 | COG01522 | Lrp    | P | Transcriptional regulator (Lrp/AsnC family)                                                                    |
| arCOG01956 | COG00475 | KefB   | P | Kef-type K <sup>+</sup> transport system, membrane component fused to CBS domains                              |
| arCOG01958 | COG01226 | Kch    | P | Kef-type K <sup>+</sup> transport system, predicted NAD binding component                                      |
| arCOG01969 | COG00475 | KefB   | P | Kef-type K <sup>+</sup> transport system, membrane component                                                   |
| arCOG02019 | COG02897 | SseA   | P | Rhodanese-related sulfurtransferase                                                                            |
| arCOG02250 | COG00619 | CbiQ   | P | ABC-type cobalt transport system, permease component CbiQ or related transporter                               |
| arCOG02569 | COG00038 | EriC   | P | Chloride channel protein EriC                                                                                  |
| arCOG02764 | COG02608 | CopZ   | P | Copper-ion-binding protein                                                                                     |
| arCOG02854 | COG02146 | {NirD} | P | Ferredoxin subunit of nitrite reductase or ring-hydroxylating dioxygenase                                      |
| arCOG04191 | COG02046 | MET3   | P | ATP sulfurylase (sulfate adenyltransferase)                                                                    |
| arCOG04703 | COG03256 | NorB   | P | Nitric oxide reductase large subunit                                                                           |
| arCOG05372 | COG01121 | ZnuC   | P | ABC-type Mn/Zn transport system, ATPase component                                                              |
| arCOG00696 | COG01228 | HutI   | Q | Imidazolonepropionase or related amidohydrolase                                                                |
| arCOG01401 | COG00500 |        | Q | SAM-dependent methyltransferase                                                                                |
| arCOG01402 | COG00500 |        | Q | SAM-dependent methyltransferase                                                                                |
| arCOG01790 | COG00500 |        | Q | SAM-dependent methyltransferase                                                                                |
| arCOG02004 | COG03473 | -      | Q | Maleate cis-trans isomerase                                                                                    |

|            |          |      |   |                                                                                             |
|------------|----------|------|---|---------------------------------------------------------------------------------------------|
| arCOG04489 | COG04689 | -    | Q | Acetoacetate decarboxylase related enzyme                                                   |
| arCOG04583 | COG00500 | -    | Q | SAM-dependent methyltransferase                                                             |
| arCOG00589 | COG00455 | -    | R | CobQ/CobB/MinD/ParA ATPase                                                                  |
| arCOG00185 | COG01123 | -    | R | ATPase component of various ABC-type transport system, contain duplicated ATPase            |
| arCOG00236 | COG03970 | -    | R | Fumarylacetoacetate (FAA) hydrolase family protein                                          |
| arCOG00266 | COG02041 | -    | R | Sulfite oxidase or related enzyme                                                           |
| arCOG00434 | COG00714 | -    | R | MoxR-like ATPase                                                                            |
| arCOG00498 | COG00491 | GloB | R | Metal-dependent hydrolase of the beta-lactamase superfamily II                              |
| arCOG00505 | COG00491 | GloB | R | Metal-dependent hydrolase of the beta-lactamase superfamily II                              |
| arCOG00606 | COG00517 | -    | R | CBS domain                                                                                  |
| arCOG00654 | COG02107 | -    | R | Predicted periplasmic solute-binding protein                                                |
| arCOG00837 | COG00456 | RimI | R | Acetyltransferase (GNAT) family                                                             |
| arCOG00938 | COG00535 | -    | R | Radical SAM superfamily enzyme                                                              |
| arCOG01093 | COG02406 | -    | R | Protein distantly related to bacterial ferritins                                            |
| arCOG01108 | COG01473 | AbgB | R | Metal-dependent amidase/aminoacylase/carboxypeptidase                                       |
| arCOG01137 | COG00824 | FcbC | R | Thioesterase superfamily enzyme                                                             |
| arCOG01141 | COG00622 | -    | R | Phosphoesterase                                                                             |
| arCOG01149 | COG01708 | -    | R | Calcineurin-like phosphoesterase                                                            |
| arCOG01195 | COG01708 | -    | R | Minimal nucleotidyltransferase                                                              |
| arCOG01197 | COG01708 | -    | R | Minimal nucleotidyltransferase                                                              |
| arCOG01202 | COG01708 | -    | R | Minimal nucleotidyltransferase                                                              |
| arCOG01205 | COG01708 | -    | R | Minimal nucleotidyltransferase                                                              |
| arCOG01283 | COG01545 | -    | R | Predicted nucleic-acid-binding protein containing a Zn-ribbon                               |
| arCOG01287 | COG01545 | -    | R | Predicted nucleic-acid-binding protein containing a Zn-ribbon                               |
| arCOG01288 | COG01545 | -    | R | OB-fold domain and Zn-ribbon containing protein, possible acyl-CoA-binding protein          |
| arCOG01383 | COG01216 | -    | R | Predicted glycosyltransferase                                                               |
| arCOG01422 | COG05493 | -    | R | RecB-like nuclease fused to coiled-coil domain                                              |
| arCOG01424 | COG05493 | -    | R | RecB-nuclease fused to coiled-coil domain                                                   |
| arCOG01425 | COG05493 | -    | R | RecB family nuclease with coiled-coil N-terminal domain                                     |
| arCOG01426 | COG05493 | -    | R | RecB family nuclease with coiled-coil N-terminal domain, paREP7 family protein              |
| arCOG01506 | COG03381 | TorD | R | Uncharacterized component of anaerobic dehydrogenase                                        |
| arCOG01618 | COG00656 | ARA1 | R | Aldo/keto reductase, related to diketogulonate reductase                                    |
| arCOG01622 | COG00673 | MviM | R | Predicted dehydrogenase                                                                     |
| arCOG01852 | COG02151 | PaaD | R | Predicted metal-sulfur cluster biosynthetic enzyme                                          |
| arCOG01930 | COG02159 | -    | R | Predicted metal-dependent hydrolase of the TIM-barrel fold                                  |
| arCOG01931 | COG02159 | -    | R | Predicted metal-dependent hydrolase of the TIM-barrel fold                                  |
| arCOG01937 | COG01750 | -    | R | Archaeal serine protease                                                                    |
| arCOG01982 | COG00434 | SgcQ | R | Predicted TIM-barrel enzyme                                                                 |
| arCOG02017 | COG01853 | -    | R | Conserved protein/domain typically associated with flavoprotein oxygenase, DIM6/NTAB family |
| arCOG02110 | COG01708 | -    | R | Minimal nucleotidyltransferase                                                              |
| arCOG02431 | COG01611 | -    | R | Predicted Rossmann fold nucleotide-binding protein                                          |
| arCOG02586 | COG00727 | -    | R | Predicted Fe-S-cluster oxidoreductase                                                       |
| arCOG02935 | COG01741 | -    | R | Pirin-related protein                                                                       |
| arCOG03166 | COG01672 | -    | R | AAA+ superfamily ATPase fused to HTH nad                                                    |
| arCOG03168 | COG01373 | -    | R | RecB nuclease domains                                                                       |
| arCOG03237 | COG01106 | -    | R | Predicted ATPase (AAA+ superfamily)                                                         |
| arCOG03850 | COG04122 | -    | R | ATPase, predicted component of phage defense system                                         |
| arCOG04004 | COG00666 | Arp  | R | Predicted O-methyltransferase                                                               |
|            |          |      | R | Ankyrin repeats containing protein                                                          |

|            |          |         |   |                                                                                                     |
|------------|----------|---------|---|-----------------------------------------------------------------------------------------------------|
| arCOG04082 | COG02366 | -       | R | Protein related to penicillin acylase                                                               |
| arCOG04197 |          |         | R | Transposase related protein                                                                         |
| arCOG04204 | COG03342 | -       | R | N-terminal nucleophile hydrolase superfamily protein                                                |
| arCOG04225 | COG02110 | -       | R | Predicted phosphatase homologous to the C-terminal domain of histone macroH2A1                      |
| arCOG04285 | COG02079 | PrpD    | R | Uncharacterized protein involved in propionate catabolism                                           |
| arCOG04328 | COG04028 | -       | R | Predicted P-loop ATPase/GTPase                                                                      |
| arCOG04756 | COG00679 | -       | R | Predicted permease                                                                                  |
| arCOG05331 | COG02391 | -       | R | Predicted transporter component                                                                     |
| arCOG05632 | COG02391 | -       | R | Predicted transporter component                                                                     |
| arCOG06914 | COG03378 | -       | R | Phage associated DNA primase                                                                        |
| arCOG07054 | COG03193 | GlcG    | R | Uncharacterized protein, possibly involved in utilization of glycolate and propanediol              |
| arCOG07331 | COG02433 | -       | R | Uncharacterized conserved protein                                                                   |
| arCOG07501 | COG01994 | SpoIVFB | R | Zn-dependent protease                                                                               |
| arCOG07957 | COG02342 | -       | R | Uncharacterized TIM barrel protein                                                                  |
| arCOG07960 | COG02607 | -       | R | ATPase (AAA+ superfamily)                                                                           |
| arCOG02209 | COG02244 | RfbX    | R | Polysaccharide biosynthesis protein, Mvin family                                                    |
| arCOG00385 |          |         | S | Uncharacterized conserved protein                                                                   |
| arCOG00723 | COG05483 | -       | S | Uncharacterized conserved protein                                                                   |
| arCOG00761 | COG01720 | -       | S | Uncharacterized conserved protein                                                                   |
| arCOG01119 | COG04274 | -       | S | GYP domain, alpha/beta barrel superfamily                                                           |
| arCOG01314 |          |         | S | Uncharacterized conserved membrane protein                                                          |
| arCOG01471 | COG03945 | -       | S | Hemerythrin HHE cation binding domain containing protein                                            |
| arCOG01668 | COG03370 | -       | S | Uncharacterized conserved protein                                                                   |
| arCOG01917 |          |         | S | Zn-ribbon domain containing protein                                                                 |
| arCOG02008 | COG03371 | -       | S | Predicted membrane protein                                                                          |
| arCOG02113 | COG02427 | -       | S | Uncharacterized conserved protein                                                                   |
| arCOG02149 | COG00599 | -       | S | Uncharacterized homolog of gamma-carboxymuconolactone decarboxylase subunit                         |
| arCOG02287 | COG00393 | -       | S | Uncharacterized beta/alpha-propeller protein, likely forms oligomers                                |
| arCOG02527 | COG03291 | -       | S | PKD repeats containing protein                                                                      |
| arCOG02556 | COG01520 | -       | S | WD40-like repeat                                                                                    |
| arCOG02562 | COG03391 | -       | S | Beta-propeller repeat containing protein                                                            |
| arCOG02739 | COG01433 | -       | S | NifX family protein                                                                                 |
| arCOG02835 | COG02324 | -       | S | Uncharacterized conserved membrane protein                                                          |
| arCOG02884 | COG04743 | -       | S | Predicted membrane protein                                                                          |
| arCOG02887 | COG04743 | -       | S | Predicted membrane protein                                                                          |
| arCOG03176 | COG01584 | -       | S | Predicted membrane protein                                                                          |
| arCOG03384 | COG04946 | -       | S | Uncharacterized protein related to the periplasmic component of the Tol biopolymer transport system |
| arCOG03460 | COG02120 | -       | S | Uncharacterized protein, LmbE homolog                                                               |
| arCOG03704 |          |         | S | Uncharacterized conserved protein                                                                   |
| arCOG03724 |          |         | S | KID-like repeats containing protein, paREP15 family                                                 |
| arCOG03749 | COG04243 | -       | S | Predicted membrane protein                                                                          |
| arCOG03769 |          |         | S | Uncharacterized conserved membrane protein                                                          |
| arCOG03824 |          |         | S | Uncharacterized conserved protein                                                                   |
| arCOG03841 | COG03535 | -       | S | Uncharacterized conserved protein                                                                   |
| arCOG04017 |          |         | S | Uncharacterized conserved protein                                                                   |
| arCOG04025 |          |         | S | Uncharacterized conserved protein                                                                   |
| arCOG04033 |          |         | S | Uncharacterized conserved protein                                                                   |
| arCOG04039 |          |         | S | Uncharacterized conserved protein                                                                   |
| arCOG04132 | COG04697 | -       | S | Uncharacterized conserved protein                                                                   |
| arCOG04216 |          |         | S | Uncharacterized conserved protein                                                                   |
| arCOG04394 | COG01416 | -       | S | Uncharacterized conserved protein                                                                   |
| arCOG04474 |          |         | S | Uncharacterized conserved protein                                                                   |
| arCOG04811 | COG02383 | -       | S | Uncharacterized conserved membrane protein, Fun14 family                                            |
| arCOG05127 |          |         | S | Uncharacterized conserved protein                                                                   |
| arCOG05371 |          |         | S | Uncharacterized conserved protein                                                                   |

|            |          |           |   |                                                                                           |
|------------|----------|-----------|---|-------------------------------------------------------------------------------------------|
| arCOG05400 |          |           | S | Protein containing potential lipid transfer domain, START superfamily                     |
| arCOG05472 |          |           | S | Uncharacterized conserved protein                                                         |
| arCOG05906 |          |           | S | Uncharacterized conserved protein                                                         |
| arCOG05908 | COG01633 | -         | S | Ferritin-like domain                                                                      |
| arCOG06019 |          |           | S | Uncharacterized conserved protein                                                         |
| arCOG06043 |          |           | S | Uncharacterized conserved protein                                                         |
| arCOG06052 |          |           | S | Uncharacterized conserved protein                                                         |
| arCOG06085 |          |           | S | Uncharacterized conserved protein                                                         |
| arCOG06103 |          |           | S | Uncharacterized conserved protein                                                         |
| arCOG06975 |          |           | S | Uncharacterized conserved protein                                                         |
| arCOG07053 |          |           | S | Uncharacterized conserved membrane protein                                                |
| arCOG07182 |          |           | S | Uncharacterized conserved protein                                                         |
| arCOG07221 |          |           | S | Zn-finger protein                                                                         |
| arCOG07247 |          |           | S | Uncharacterized conserved protein                                                         |
| arCOG07288 |          |           | S | Uncharacterized conserved protein                                                         |
| arCOG07304 |          |           | S | Uncharacterized conserved protein                                                         |
| arCOG07332 |          |           | S | Uncharacterized conserved protein                                                         |
| arCOG07334 |          |           | S | Uncharacterized conserved protein                                                         |
| arCOG07347 |          |           | S | Uncharacterized conserved protein                                                         |
| arCOG07461 |          |           | S | Uncharacterized conserved protein                                                         |
| arCOG07493 |          |           | S | Uncharacterized conserved protein                                                         |
| arCOG07520 | COG02442 | -         | S | Uncharacterized conserved protein                                                         |
| arCOG07527 |          |           | S | Predicted metal-binding protein                                                           |
| arCOG07930 |          |           | S | Zinc finger C2H2-type                                                                     |
| arCOG08554 |          |           | S | Uncharacterized conserved protein                                                         |
| arCOG08585 |          |           | S | Uncharacterized conserved protein                                                         |
| arCOG09701 |          |           | S | Uncharacterized conserved protein                                                         |
| arCOG09893 |          |           | S | Uncharacterized conserved protein                                                         |
| arCOG09902 |          |           | S | Uncharacterized conserved protein                                                         |
| arCOG09905 |          |           | S | Uncharacterized conserved protein                                                         |
| arCOG10174 |          |           | S | Uncharacterized conserved protein                                                         |
| arCOG10215 |          |           | S | Uncharacterized conserved protein                                                         |
| arCOG10434 |          |           | S | Uncharacterized conserved protein                                                         |
| arCOG10508 |          |           | S | Uncharacterized conserved protein                                                         |
| arCOG11038 |          |           | S | Uncharacterized conserved protein                                                         |
| arCOG04325 | COG01702 | PhoH      | T | Phosphate starvation-inducible protein PhoH, predicted ATPase                             |
| arCOG04035 | COG03451 | VirB4     | U | Type IV secretory pathway, VirB4 component                                                |
| arCOG07496 | COG03451 | VirB4     | U | Type IV secretory pathway, VirB4 component                                                |
| arCOG00726 | COG04113 | -         | V | PIN domain containing protein                                                             |
| arCOG00727 | COG04113 | -         | V | PIN domain containing protein                                                             |
| arCOG00786 | COG01468 | Cas4      | V | CRISPR-associated protein Cas4, RecB family exonuclease                                   |
| arCOG01008 | COG00864 | NikR      | V | Transcriptional regulator, CopG/Arc/MetJ family (DNA-binding and a metal-binding domains) |
| arCOG01199 | COG01708 | -         | V | Minimal nucleotidyltransferase                                                            |
| arCOG01439 | COG05551 | Cas6      | V | CRISPR system related protein, RAMP superfamily Cas6 group                                |
| arCOG01444 | COG01203 | Cas3      | V | CRISPR-associated helicase Cas3                                                           |
| arCOG01465 | COG00842 | -         | V | ABC-type multidrug transport system, permease component                                   |
| arCOG01468 | COG00842 | -         | V | ABC-type multidrug transport system, permease component                                   |
| arCOG01469 | COG00842 | -         | V | ABC-type multidrug transport system, permease component                                   |
| arCOG01935 | COG04006 | -         | V | CRISPR system related protein, COG1517 family                                             |
| arCOG02222 | COG01848 | -         | V | PIN domain containing protein                                                             |
| arCOG02654 | COG03337 | -         | V | CRISPR system related protein, small subunit of CASCADE complex                           |
| arCOG02656 | COG03337 | -         | V | CRISPR system related protein, small subunit of CASCADE complex                           |
| arCOG02659 | COG01337 | Cas7/Csm3 | V | CRISPR system related protein, RAMP superfamily Cas7 group                                |
| arCOG02660 | COG01337 | Cas7/Csm3 | V | CRISPR system related protein, RAMP superfamily Cas7 group                                |

|                                   |          |           |   |                                                                                                          |
|-----------------------------------|----------|-----------|---|----------------------------------------------------------------------------------------------------------|
| arCOG02665                        | COG01769 | Cas5/Cmr3 | V | CRISPR system related protein, RAMP superfamily Cas5 group                                               |
| arCOG02666                        | COG01353 | Cas10     | V | CRISPR associated protein, polymerase-related domain and HD family nuclease                              |
| arCOG02670                        | COG01688 | Cas5      | V | CRISPR system related protein Cas5, RAMP superfamily                                                     |
| arCOG02731                        | COG01487 | VapC      | V | PIN domain containing protein                                                                            |
| arCOG02841                        | COG01132 | MdIB      | V | ABC-type multidrug transport system, ATPase and permease component                                       |
| arCOG03433                        | COG01517 | -         | V | CRISPR system related protein, COG1517 family                                                            |
| arCOG03617                        | COG01857 | Cas7      | V | CRISPR system related protein Cas7, RAMP superfamily                                                     |
| arCOG03706                        | COG01848 |           | V | PIN domain containing protein                                                                            |
| arCOG03707                        |          |           | V | HEPN domain                                                                                              |
| arCOG03722                        |          |           | V | HEPN domain                                                                                              |
| arCOG03823                        |          |           | V | CRISPR system associated protein, predicted small subunit of CASCADE complex                             |
| arCOG03847                        | COG01517 |           | V | CRISPR system related protein, COG1517 family                                                            |
| arCOG04194                        | COG01343 | Cas2      | V | CRISPR-associated protein Cas2                                                                           |
| arCOG04195                        | COG04343 | -         | V | CRISPR-associated protein, RecB family exonuclease                                                       |
| arCOG05414                        |          |           | V | CopG/RHH family DNA binding protein, antitoxin                                                           |
| arCOG05545                        |          |           | V | PIN domain containing protein                                                                            |
| arCOG06020                        | COG02250 |           | V | HEPN domain                                                                                              |
| arCOG06028                        | COG01487 | VapC      | V | PIN domain containing protein                                                                            |
| arCOG06164                        |          |           | V | Inactivated PIWI domain containing phage-defense protein                                                 |
| arCOG07235                        |          |           | V | RHH/CopG DNA binding protein                                                                             |
| arCOG07256                        |          |           | V | CRISPR-associated protein                                                                                |
| arCOG07723                        |          |           | V | RHH/CopG DNA binding protein                                                                             |
| arCOG08086                        | COG01848 |           | V | PIN domain containing protein                                                                            |
| arCOG08357                        |          |           | V | CopG/RHH family DNA binding protein                                                                      |
| <b>Gain in other Sulfolobales</b> |          |           |   |                                                                                                          |
| arCOG00341                        | COG00277 | GlcD      | C | FAD/FMN-containing dehydrogenase                                                                         |
| arCOG00448                        | COG02086 | FixA      | C | Electron transfer flavoprotein, alpha and beta subunits                                                  |
| arCOG00583                        | COG02224 | AceA      | C | Isocitrate lyase                                                                                         |
| arCOG00615                        | COG01902 | NemA      | C | NADH:flavin oxidoreductase, Old Yellow Enzyme family                                                     |
| arCOG00753                        | COG00578 | GlpA      | C | Glycerol-3-phosphate dehydrogenase                                                                       |
| arCOG01985                        | COG02440 | FixX      | C | Ferredoxin-like protein                                                                                  |
| arCOG03700                        |          | SoxE      | C | Sulfocyanin                                                                                              |
| arCOG06967                        |          |           | C | Sulphur oxygenase/reductase                                                                              |
| arCOG07293                        | COG01192 | Soj       | D | ATPase involved in chromosome partitioning, ParA family                                                  |
| arCOG00124                        | COG00175 | CysH      | E | 3'-phosphoadenosine 5'-phosphosulfate sulfotransferase (PAPS reductase)/FAD synthetase or related enzyme |
| arCOG00698                        | COG00804 | UreC      | E | Urea amidohydrolase (urease) alpha subunit                                                               |
| arCOG00759                        | COG00665 | DadA      | E | Glycine/D-amino acid oxidase (deaminating)                                                               |
| arCOG01109                        | COG00624 | ArgE      | E | Acetylornithine deacetylase/Succinyl-diaminopimelate desuccinylase or related deacylase                  |
| arCOG01647                        | COG01505 | -         | E | Serine protease of the peptidase family S9A                                                              |
| arCOG01673                        | COG00747 | DdpA      | E | ABC-type transport system, periplasmic component                                                         |
| arCOG01730                        | COG03384 | -         | E | Aromatic ring-opening dioxygenase, catalytic LigB subunit related enzyme                                 |
| arCOG02001                        | COG00028 | IlvB      | E | Acetolactate synthase large subunit or other thiamine pyrophosphate-requiring enzyme                     |
| arCOG03108                        | COG02235 | ArcA      | E | Arginine deiminase                                                                                       |
| arCOG03463                        | COG00531 | PotE      | E | Amino acid transporter                                                                                   |
| arCOG03464                        | COG00531 | PotE      | E | Amino acid transporter                                                                                   |
| arCOG03649                        | COG00531 | PotE      | E | Amino acid transporter                                                                                   |

|            |          |      |   |                                                                                  |
|------------|----------|------|---|----------------------------------------------------------------------------------|
| arCOG03656 | COG00028 |      | E | Thiamine pyrophosphate-requiring enzyme, carboxylase                             |
| arCOG04527 | COG00832 | UreB | E | Urea amidohydrolase (urease) beta subunit                                        |
| arCOG04528 | COG00831 | UreA | E | Urea amidohydrolase (urease) gamma subunit                                       |
| arCOG05410 | COG00444 | DppD | E | ABC-type dipeptide/oligopeptide/nickel transport system, ATPase component        |
| arCOG06037 | COG00346 | GloA | E | Catechol 2,3-dioxygenase or other lactoylglutathione lyase family enzyme         |
| arCOG07260 | COG03191 | DmpA | E | L-aminopeptidase/D-esterase                                                      |
| arCOG00090 | COG00518 | GuaA | F | GMP synthase - Glutamine amidotransferase domain                                 |
| arCOG00697 | COG00402 | SsnA | F | Cytosine deaminase or related metal-dependent hydrolase                          |
| arCOG01325 | COG00813 | DeoD | F | Purine-nucleoside phosphorylase                                                  |
| arCOG00135 | COG00477 | ProP | G | Permease of the major facilitator superfamily                                    |
| arCOG00140 | COG00477 | ProP | G | Permease of the major facilitator superfamily                                    |
| arCOG01896 | COG01082 | IolE | G | Sugar phosphate isomerase/epimerase                                              |
| arCOG01902 | COG01082 | IolE | G | Sugar phosphate isomerase/epimerase                                              |
| arCOG01999 | COG00028 |      | G | Pyruvate oxidase                                                                 |
| arCOG02684 | COG00477 | ProP | G | Permease of the major facilitator superfamily                                    |
| arCOG02690 | COG00477 | ProP | G | Permease of the major facilitator superfamily                                    |
| arCOG02692 | COG00477 | ProP | G | Permease of the major facilitator superfamily                                    |
| arCOG02693 | COG00477 | ProP | G | Permease of the major facilitator superfamily                                    |
| arCOG02794 | COG00477 | ProP | G | Permease of the major facilitator superfamily                                    |
| arCOG02949 | COG01523 | PulA | G | Bifunctional 4-alpha-glucanotransferase/ amylo-alpha-1,6-glucosidase             |
| arCOG02951 | COG00296 | GlgB | G | 1,4-alpha-glucan branching enzyme                                                |
| arCOG02955 | COG03280 | TreY | G | Maltooligosyl trehalose synthase                                                 |
| arCOG03286 | COG03387 | SGA1 | G | Glycosyl hydrolase family 15                                                     |
| arCOG03864 | COG04354 | -    | G | Predicted bile acid beta-glucosidase                                             |
| arCOG03865 | COG04354 | -    | G | Predicted bile acid beta-glucosidase                                             |
| arCOG04431 | COG00580 | GlpF | G | Glycerol uptake facilitator or related permease (Major Intrinsic Protein Family) |
| arCOG05344 | COG00477 | ProP | G | Permease of the major facilitator superfamily                                    |
| arCOG05370 | COG03386 | -    | G | Gluconolactonase                                                                 |
| arCOG06047 | COG00477 | ProP | G | Permease of the major facilitator superfamily                                    |
| arCOG00646 | COG00007 | CysG | H | Uroporphyrinogen-III methylase                                                   |
| arCOG05415 |          |      | H | Carotene hydroxylase                                                             |
| arCOG06031 | COG05424 | -    | H | Pyrrroloquinoline quinone (Coenzyme PQQ) biosynthesis protein C                  |
| arCOG01262 | COG01028 | FabG | I | Short-chain alcohol dehydrogenase                                                |
| arCOG01281 | COG00183 | PaaJ | I | Acetyl-CoA acetyltransferase                                                     |
| arCOG02936 | COG01562 | ERG9 | I | Phytoene/squalene synthetase                                                     |
| arCOG05964 | COG01960 | CaiA | I | Acyl-CoA dehydrogenase                                                           |
| arCOG05965 | COG01960 | CaiA | I | Acyl-CoA dehydrogenase                                                           |
| arCOG06051 | COG01960 | CaiA | I | Acyl-CoA dehydrogenase                                                           |
| arCOG06122 | COG00365 | Acs  | I | Acyl-coenzyme A synthetase/AMP-(fatty) acid ligase                               |
| arCOG07349 | COG01670 | RimL | J | Acetyltransferase, RimL family                                                   |
| arCOG00871 | COG00553 | HepA | K | Superfamily II DNA/RNA helicase, SNF2 family                                     |
| arCOG00883 | COG00553 | HepA | K | Superfamily II DNA/RNA helicase, SNF2 family                                     |
| arCOG01586 | COG01522 | Lrp  | K | Transcriptional regulator (Lrp/AsnC family)                                      |
| arCOG01587 | COG01522 | Lrp  | K | Transcriptional regulator (Lrp/AsnC family)                                      |
| arCOG01905 | COG04189 | -    | K | Predicted transcriptional regulator                                              |
| arCOG02273 | COG03413 | -    | K | Predicted transcriptional regulator, C-terminal HTH-like domain                  |
| arCOG02647 | COG01309 | AcrR | K | Transcriptional regulator, TetR/AcrR family                                      |
| arCOG03181 | COG01846 | MarR | K | Transcriptional regulator, MarR family                                           |
| arCOG03423 | COG01846 | MarR | K | Transcriptional regulator, MarR family                                           |
| arCOG04027 | COG01725 | -    | K | Transcriptional regulator (GntR family)                                          |

|            |          |        |   |                                                                                                |
|------------|----------|--------|---|------------------------------------------------------------------------------------------------|
| arCOG07233 | COG03327 | PaaX   | K | Phenylacetic acid-responsive transcriptional repressor                                         |
| arCOG07251 |          |        | K | Predicted transcriptional regulator                                                            |
| arCOG07311 |          |        | K | Predicted transcriptional regulator, HTH domain                                                |
| arCOG07935 | COG01475 | Spo0J  | K | Chromosome partitioning protein ParB                                                           |
| arCOG08306 | COG01497 | -      | K | Predicted transcriptional regulator, HTH domain                                                |
| arCOG09713 | COG01846 |        | K | Predicted transcriptional regulator, contains ATP-binding and HTH domains                      |
| arCOG00680 | COG00675 | -      | L | Transposase                                                                                    |
| arCOG00683 | COG00675 | -      | L | Transposase                                                                                    |
| arCOG00684 | COG00675 | -      | L | Transposase                                                                                    |
| arCOG00889 | COG01743 | -      | L | Adenine-specific DNA methylase containing a Zn-ribbon                                          |
| arCOG02127 | COG03335 | -      | L | Transposase                                                                                    |
| arCOG02130 | COG03335 | -      | L | Transposase                                                                                    |
| arCOG02133 | COG01662 | InsB   | L | Transposase and inactivated derivatives, IS1 family                                            |
| arCOG02754 | COG03039 | -      | L | Transposase, IS5 family                                                                        |
| arCOG02840 | COG00415 | PhrB   | L | Deoxyribodipyrimidine photolyase                                                               |
| arCOG03240 | COG01195 | RecF   | L | Recombinational DNA repair ATPase RecF                                                         |
| arCOG03586 | COG03547 | -      | L | Transposase                                                                                    |
| arCOG03587 | COG03547 | -      | L | Transposase                                                                                    |
| arCOG03902 | COG03385 | -      | L | Transposase                                                                                    |
| arCOG04582 | COG00389 | DinP   | L | Nucleotidyltransferase/DNA polymerase involved in DNA repair                                   |
| arCOG04918 | COG03328 | -      | L | Transposase                                                                                    |
| arCOG06508 | COG03039 | -      | L | Transposase and inactivated derivatives, IS5 family                                            |
| arCOG06915 |          |        | L | Primase-polymerase (primpol) domain                                                            |
| arCOG07300 |          |        | L | Uncharacterized conserved protein associated with DNA polymerase II                            |
| arCOG07303 | COG00675 | -      | L | Transposase                                                                                    |
| arCOG07312 |          |        | L | NurA-like nuclease                                                                             |
| arCOG07730 |          |        | L | DEDD family 3'-5' exonuclease                                                                  |
| arCOG07732 | COG05558 | -      | L | Transposase                                                                                    |
| arCOG07922 |          |        | L | Transposase ISC1217                                                                            |
| arCOG07925 |          |        | L | Transposase ISC1234                                                                            |
| arCOG07929 |          |        | L | Transposon ISC1160                                                                             |
| arCOG08574 |          |        | L | Viral/Archaeal nuclease                                                                        |
| arCOG09995 |          |        | L | Transposon-associated protein                                                                  |
| arCOG05431 | COG00438 | RfaG   | M | Glycosyltransferase                                                                            |
| arCOG05966 | COG03511 | PlcC   | M | Phospholipase C                                                                                |
| arCOG00540 | COG05131 | URM1   | O | Ubiquitin-like protein                                                                         |
| arCOG02074 | COG00425 | SirA   | O | Predicted redox protein, regulator of disulfide bond formation                                 |
| arCOG02816 | COG00225 | MsrA   | O | Peptide methionine sulfoxide reductase                                                         |
| arCOG03669 | COG04934 | -      | O | Subtilase family protease                                                                      |
| arCOG04530 | COG00830 | UreF   | O | Urease accessory protein UreF                                                                  |
| arCOG06188 | COG02371 | UreE   | O | Urease accessory protein UreE                                                                  |
| arCOG08336 | COG00425 | SirA   | O | Predicted redox protein, regulator of disulfide bond formation                                 |
| arCOG00320 | COG00704 | PhoU   | P | Phosphate uptake regulator                                                                     |
| arCOG02055 | COG00155 | CysI   | P | Sulfite reductase, beta subunit (hemoprotein)                                                  |
| arCOG02855 | COG02146 | {NirD} | P | Ferredoxin subunit of nitrite reductase or ring-hydroxylating dioxygenase                      |
| arCOG04355 | COG01275 | TehA   | P | Tellurite resistance protein or related permease                                               |
| arCOG05356 | COG02382 | Fes    | P | Enterochelin esterase or related enzyme                                                        |
| arCOG07228 | COG02608 |        | P | Heavy-metal-associated domain                                                                  |
| arCOG07339 |          |        | P | DsrE/DsrF-like family                                                                          |
| arCOG07775 | COG04638 | HcaE   | P | Phenylpropionate dioxygenase or related ring-hydroxylating dioxygenase, large terminal subunit |
| arCOG01659 | COG00412 | -      | Q | Dienelactone hydrolase or related enzyme                                                       |
| arCOG01786 | COG00500 |        | Q | SAM-dependent methyltransferase                                                                |
| arCOG02703 | COG00500 |        | Q | SAM-dependent methyltransferase                                                                |
| arCOG04786 | COG03396 | -      | Q | Phenylacetic acid catabolic protein                                                            |
| arCOG05303 | COG04829 |        | Q | Muconolactone delta-isomerase                                                                  |

|            |          |      |   |                                                                                     |
|------------|----------|------|---|-------------------------------------------------------------------------------------|
| arCOG07263 | COG01735 | Php  | Q | Thermostable phosphotriesterase, metal-dependent hydrolase with the TIM-barrel fold |
| arCOG07267 | COG03733 | TynA | Q | Cu <sup>2+</sup> -containing amine oxidase                                          |
| arCOG08361 | COG04228 | TmoE | Q | Methane/Phenol/Toluene Hydroxylase component, ferritin superfamily                  |
| arCOG08362 |          | TmoD | Q | MmoB/DmpM family, monooxygenase component                                           |
| arCOG08363 |          |      | Q | Methane/Phenol/Toluene Hydroxylase component                                        |
| arCOG08364 | COG04228 | TmoA | Q | Methane/Phenol/Toluene Hydroxylase component, ferritin superfamily                  |
| arCOG08438 | COG05517 | -    | Q | Small subunit of phenylpropionate dioxygenase                                       |
| arCOG00323 | COG00312 | TldD | R | Predicted Zn-dependent protease or their inactivated homolog                        |
| arCOG00507 | COG00491 | GloB | R | Zn-dependent hydrolase, glyoxylase family                                           |
| arCOG00510 | COG00655 | WrbA | R | Multimeric flavodoxin WrbA                                                          |
| arCOG00511 | COG00491 | GloB | R | Metal-dependent hydrolase of the beta-lactamase superfamily II                      |
| arCOG00517 | COG00491 | GloB | R | Rhodanese Homology Domain fused to Zn-dependent hydrolase of glyoxylase family      |
| arCOG00887 | COG01483 | -    | R | Predicted ATPase (AAA+ superfamily)                                                 |
| arCOG00931 | COG00535 | -    | R | Radical SAM superfamily enzyme                                                      |
| arCOG01070 | COG00446 | HcaD | R | NAD(FAD)-dependent dehydrogenase                                                    |
| arCOG01256 | COG02872 | -    | R | Predicted metal-dependent hydrolase related to alanyl-tRNA synthetase HxxxH domain  |
| arCOG01284 | COG01545 | -    | R | Predicted nucleic-acid-binding protein containing a Zn-ribbon                       |
| arCOG01289 | COG01545 | -    | R | Predicted nucleic-acid-binding protein containing a Zn-ribbon                       |
| arCOG01299 | COG00446 | HcaD | R | NAD(FAD)-dependent dehydrogenase                                                    |
| arCOG01670 | COG02044 |      | R | Predicted peroxiredoxin                                                             |
| arCOG01932 | COG02159 | -    | R | Predicted metal-dependent hydrolase of the TIM-barrel fold                          |
| arCOG01933 | COG02159 | -    | R | Predicted metal-dependent hydrolase of the TIM-barrel fold                          |
| arCOG01934 | COG02159 | -    | R | Predicted metal-dependent hydrolase of the TIM-barrel fold                          |
| arCOG02065 | COG02210 | -    | R | Peroxioredoxin family protein                                                       |
| arCOG02076 | COG02044 | -    | R | Predicted peroxiredoxin                                                             |
| arCOG03031 | COG03253 | ywfl | R | Chlorite dismutase                                                                  |
| arCOG03032 | COG00457 | NrfG | R | TPR repeats containing protein                                                      |
| arCOG03431 | COG04279 | -    | R | SWIM zinc finger containing protein                                                 |
| arCOG03842 | COG00526 |      | R | TlpA/TrxA-like family protein                                                       |
| arCOG03843 |          |      | R | TlpA/TrxA-like family protein                                                       |
| arCOG05628 | COG00730 | -    | R | Predicted permease                                                                  |
| arCOG06005 | COG03975 | -    | R | Predicted protease with the C-terminal PDZ domain                                   |
| arCOG06009 |          |      | R | Predicted permease                                                                  |
| arCOG06014 | COG04194 | -    | R | Predicted membrane protein                                                          |
| arCOG07181 | COG03889 |      | R | Predicted solute binding protein                                                    |
| arCOG07202 | COG01988 |      | R | Predicted membrane-bound metal-dependent hydrolase, DUF457                          |
| arCOG07281 | COG00457 | NrfG | R | TPR repeats containing protein                                                      |
| arCOG07313 |          |      | R | ATPase, uncharacterized                                                             |
| arCOG07719 | COG00535 | -    | R | Radical SAM superfamily enzyme                                                      |
| arCOG00023 | COG02522 |      | S | Uncharacterized conserved protein                                                   |
| arCOG02108 | COG02445 | -    | S | HEPN domain containing protein                                                      |
| arCOG02560 | COG03391 | -    | S | Beta-propeller repeat containing protein                                            |
| arCOG02617 |          |      | S | Uncharacterized conserved protein                                                   |
| arCOG02719 | COG02034 | -    | S | Predicted membrane protein                                                          |
| arCOG02761 | COG03439 | -    | S | Uncharacterized conserved protein                                                   |
| arCOG02863 | COG02259 | -    | S | Predicted membrane protein, DoxD family                                             |
| arCOG03002 | COG01917 | -    | S | Cupin domain fused to uncharacterized domain of COG4309                             |
| arCOG03560 |          |      | S | Uncharacterized conserved protein                                                   |
| arCOG03693 |          |      | S | Uncharacterized conserved protein                                                   |
| arCOG03701 | COG05650 | -    | S | Predicted integral membrane protein                                                 |
| arCOG03703 | COG05650 | -    | S | Predicted integral membrane protein                                                 |
| arCOG03840 | COG03535 | -    | S | Uncharacterized conserved protein                                                   |



|            |          |   |   |                                                          |
|------------|----------|---|---|----------------------------------------------------------|
| arCOG03856 |          |   | S | Uncharacterized conserved protein                        |
| arCOG03857 |          |   | S | Uncharacterized conserved protein                        |
| arCOG03862 |          |   | S | Uncharacterized conserved protein                        |
| arCOG03868 |          |   | S | Uncharacterized conserved protein                        |
| arCOG04030 |          |   | S | Uncharacterized conserved protein                        |
| arCOG04031 |          |   | S | Uncharacterized conserved protein                        |
| arCOG04697 |          |   | S | Selenium binding protein SBP56 homolog                   |
| arCOG05211 | COG04831 | - | S | Roadblock/LC7 domain                                     |
| arCOG05278 | COG05466 | - | S | Predicted small metal-binding protein                    |
| arCOG05328 |          |   | S | Uncharacterized conserved protein                        |
| arCOG05339 |          |   | S | Uncharacterized conserved protein                        |
| arCOG05360 |          |   | S | Uncharacterized conserved protein                        |
| arCOG05362 |          |   | S | Uncharacterized conserved protein                        |
| arCOG05367 | COG05592 | - | S | Hemerythrin HHE cation binding domain containing protein |
| arCOG05416 |          |   | S | Uncharacterized conserved protein                        |
| arCOG05633 |          |   | S | Uncharacterized conserved protein                        |
| arCOG05707 |          |   | S | Uncharacterized conserved protein                        |
| arCOG05881 |          |   | S | Uncharacterized conserved protein, DUF1177               |
| arCOG05887 |          |   | S | Uncharacterized conserved protein                        |
| arCOG05889 |          |   | S | Uncharacterized conserved protein                        |
| arCOG05893 |          |   | S | Uncharacterized conserved protein                        |
| arCOG05901 |          |   | S | Uncharacterized conserved protein                        |
| arCOG05910 |          |   | S | Uncharacterized conserved protein                        |
| arCOG05914 |          |   | S | Uncharacterized conserved protein                        |
| arCOG05915 |          |   | S | Uncharacterized conserved protein                        |
| arCOG05944 |          |   | S | Uncharacterized conserved protein                        |
| arCOG05945 |          |   | S | Uncharacterized conserved protein                        |
| arCOG05962 |          |   | S | Uncharacterized conserved protein                        |
| arCOG05963 |          |   | S | Uncharacterized conserved protein                        |
| arCOG05968 |          |   | S | Uncharacterized conserved protein                        |
| arCOG05970 |          |   | S | Uncharacterized conserved protein                        |
| arCOG05982 |          |   | S | Uncharacterized conserved protein                        |
| arCOG06006 |          |   | S | Uncharacterized conserved membrane protein               |
| arCOG06010 | COG04280 | - | S | Predicted membrane protein                               |
| arCOG06012 |          |   | S | Uncharacterized conserved protein                        |
| arCOG06013 |          |   | S | Uncharacterized conserved protein                        |
| arCOG06018 |          |   | S | Uncharacterized conserved protein                        |
| arCOG06021 |          |   | S | Uncharacterized conserved protein                        |
| arCOG06030 |          |   | S | Uncharacterized conserved protein                        |
| arCOG06036 | COG00208 |   | S | Uncharacterized conserved protein                        |
| arCOG06045 | COG03589 | - | S | Uncharacterized conserved protein                        |
| arCOG06096 |          |   | S | Uncharacterized conserved protein                        |
| arCOG06946 |          |   | S | Uncharacterized conserved membrane protein               |
| arCOG06947 |          |   | S | Zn finger protein                                        |
| arCOG06952 |          |   | S | Uncharacterized conserved protein                        |
| arCOG07178 |          |   | S | Uncharacterized conserved protein                        |
| arCOG07179 |          |   | S | Uncharacterized conserved protein                        |
| arCOG07185 |          |   | S | Uncharacterized conserved protein                        |
| arCOG07187 |          |   | S | Uncharacterized conserved protein                        |
| arCOG07189 |          |   | S | Uncharacterized conserved protein                        |
| arCOG07190 |          |   | S | Uncharacterized conserved protein                        |
| arCOG07191 |          |   | S | Uncharacterized conserved protein                        |
| arCOG07196 |          |   | S | Uncharacterized conserved protein                        |
| arCOG07200 |          |   | S | Uncharacterized conserved protein                        |
| arCOG07205 |          |   | S | Uncharacterized conserved protein                        |
| arCOG07206 |          |   | S | Uncharacterized conserved protein                        |
| arCOG07209 |          |   | S | Uncharacterized conserved protein                        |
| arCOG07211 |          |   | S | Uncharacterized conserved protein                        |
| arCOG07218 |          |   | S | Uncharacterized conserved protein                        |
| arCOG07222 |          |   | S | Uncharacterized conserved protein                        |
| arCOG07224 |          |   | S | Uncharacterized conserved protein                        |
| arCOG07227 |          |   | S | Uncharacterized conserved protein                        |
| arCOG07229 |          |   | S | Uncharacterized conserved protein                        |
| arCOG07230 |          |   | S | Uncharacterized conserved protein                        |
| arCOG07231 |          |   | S | Uncharacterized conserved protein                        |
| arCOG07232 |          |   | S | Uncharacterized conserved protein                        |

|            |          |   |                                                                |
|------------|----------|---|----------------------------------------------------------------|
| arCOG07234 |          | S | Uncharacterized conserved protein                              |
| arCOG07238 |          | S | Uncharacterized conserved protein                              |
| arCOG07239 |          | S | Uncharacterized conserved protein                              |
| arCOG07243 |          | S | Uncharacterized conserved protein                              |
| arCOG07244 |          | S | Uncharacterized conserved protein                              |
| arCOG07246 |          | S | Uncharacterized conserved protein                              |
| arCOG07249 |          | S | Uncharacterized conserved protein                              |
| arCOG07250 |          | S | Uncharacterized conserved protein                              |
| arCOG07252 |          | S | Uncharacterized conserved protein                              |
| arCOG07253 |          | S | Uncharacterized conserved protein                              |
| arCOG07255 |          | S | Uncharacterized conserved protein                              |
| arCOG07257 |          | S | Uncharacterized conserved protein                              |
| arCOG07258 |          | S | Uncharacterized conserved protein                              |
| arCOG07259 |          | S | Uncharacterized conserved protein                              |
| arCOG07264 |          | S | Predicted membrane protein with C-terminal Zn ribbon domain    |
| arCOG07265 |          | S | Uncharacterized conserved protein                              |
| arCOG07268 |          | S | Uncharacterized conserved protein                              |
| arCOG07275 |          | S | Uncharacterized conserved protein                              |
| arCOG07277 |          | S | SSV1_ORF_D-335, predicted GIY-YIG nuclease superfamily protein |
| arCOG07279 |          | S | Uncharacterized conserved protein                              |
| arCOG07280 |          | S | Uncharacterized conserved protein                              |
| arCOG07282 |          | S | Uncharacterized conserved protein                              |
| arCOG07289 |          | S | Uncharacterized conserved protein                              |
| arCOG07290 |          | S | Uncharacterized conserved protein                              |
| arCOG07291 |          | S | Uncharacterized conserved protein                              |
| arCOG07294 | COG02308 | S | Uncharacterized conserved protein                              |
| arCOG07295 | COG02307 | S | Uncharacterized conserved protein                              |
| arCOG07298 |          | S | Uncharacterized conserved protein                              |
| arCOG07299 |          | S | CRISPR-associated protein CsaX                                 |
| arCOG07301 |          | S | Uncharacterized conserved protein                              |
| arCOG07307 |          | S | Uncharacterized conserved protein                              |
| arCOG07308 |          | S | Uncharacterized conserved protein                              |
| arCOG07310 |          | S | Uncharacterized conserved protein                              |
| arCOG07316 |          | S | Uncharacterized conserved protein                              |
| arCOG07317 |          | S | Uncharacterized conserved protein                              |
| arCOG07318 |          | S | Uncharacterized conserved protein                              |
| arCOG07319 |          | S | Uncharacterized conserved protein                              |
| arCOG07324 |          | S | Uncharacterized conserved protein                              |
| arCOG07325 |          | S | Uncharacterized conserved protein                              |
| arCOG07326 |          | S | Uncharacterized conserved protein                              |
| arCOG07327 |          | S | Uncharacterized conserved protein                              |
| arCOG07330 |          | S | Uncharacterized conserved protein                              |
| arCOG07333 |          | S | Uncharacterized conserved protein                              |
| arCOG07340 |          | S | Uncharacterized conserved protein                              |
| arCOG07341 |          | S | Uncharacterized conserved protein                              |
| arCOG07342 |          | S | Uncharacterized conserved protein                              |
| arCOG07343 |          | S | Uncharacterized conserved protein                              |
| arCOG07351 |          | S | Uncharacterized conserved membrane protein                     |
| arCOG07523 |          | S | Uncharacterized conserved protein                              |
| arCOG07714 |          | S | Uncharacterized conserved protein                              |
| arCOG07715 |          | S | Uncharacterized conserved protein                              |
| arCOG07717 |          | S | Uncharacterized conserved protein                              |
| arCOG07720 |          | S | Uncharacterized conserved protein                              |
| arCOG07721 |          | S | Uncharacterized conserved protein                              |
| arCOG07722 |          | S | Uncharacterized conserved protein                              |
| arCOG07724 |          | S | Uncharacterized conserved protein                              |
| arCOG07726 |          | S | Uncharacterized conserved protein                              |
| arCOG07727 |          | S | Uncharacterized conserved protein                              |
| arCOG07733 |          | S | Uncharacterized conserved protein                              |
| arCOG07734 |          | S | Uncharacterized conserved protein                              |
| arCOG07844 |          | S | PKD domain containing protein                                  |
| arCOG07848 |          | S | Uncharacterized conserved protein                              |
| arCOG07850 |          | S | Uncharacterized conserved protein                              |
| arCOG07851 |          | S | Uncharacterized conserved protein                              |
| arCOG07853 |          | S | Uncharacterized conserved protein                              |
| arCOG07940 |          | S | Uncharacterized protein                                        |
| arCOG08073 |          | S | Uncharacterized protein                                        |



|            |          |      |   |                                                                                                        |
|------------|----------|------|---|--------------------------------------------------------------------------------------------------------|
| arCOG08562 |          |      | S | Uncharacterized conserved protein                                                                      |
| arCOG08563 |          |      | S | Uncharacterized conserved protein                                                                      |
| arCOG08569 |          |      | S | Virus associated protein, V1 family<br>Sulfolobus virus associated uncharacterized<br>membrane protein |
| arCOG08572 |          |      | S | Uncharacterized conserved protein                                                                      |
| arCOG08576 |          |      | S | Uncharacterized conserved protein                                                                      |
| arCOG08583 |          |      | S | Uncharacterized conserved protein                                                                      |
| arCOG08584 |          |      | S | Uncharacterized conserved protein                                                                      |
| arCOG08587 |          |      | S | Uncharacterized conserved protein                                                                      |
| arCOG08588 |          |      | S | Uncharacterized conserved protein<br>associated with transposon                                        |
| arCOG09692 |          |      | S | Uncharacterized conserved protein<br>Uncharacterized conserved membrane<br>protein                     |
| arCOG09693 |          |      | S | Uncharacterized conserved protein                                                                      |
| arCOG09694 |          |      | S | Uncharacterized conserved protein                                                                      |
| arCOG09695 |          |      | S | Uncharacterized conserved protein                                                                      |
| arCOG09696 |          |      | S | Uncharacterized conserved protein                                                                      |
| arCOG09697 |          |      | S | Uncharacterized conserved protein                                                                      |
| arCOG09698 |          |      | S | Uncharacterized conserved protein                                                                      |
| arCOG09699 |          |      | S | Uncharacterized conserved protein                                                                      |
| arCOG09703 |          |      | S | Uncharacterized conserved protein                                                                      |
| arCOG09704 |          |      | S | Uncharacterized conserved protein                                                                      |
| arCOG09705 |          |      | S | Uncharacterized conserved protein                                                                      |
| arCOG09706 |          |      | S | Uncharacterized conserved protein                                                                      |
| arCOG09707 |          |      | S | Uncharacterized conserved protein                                                                      |
| arCOG09709 |          |      | S | Uncharacterized conserved protein                                                                      |
| arCOG09710 |          |      | S | Uncharacterized conserved protein                                                                      |
| arCOG09711 |          |      | S | Uncharacterized conserved protein                                                                      |
| arCOG09712 |          |      | S | Uncharacterized conserved protein                                                                      |
| arCOG09855 |          |      | S | Uncharacterized conserved protein                                                                      |
| arCOG09856 |          |      | S | Uncharacterized conserved protein                                                                      |
| arCOG09862 |          |      | S | Uncharacterized conserved protein                                                                      |
| arCOG09866 |          |      | S | Uncharacterized conserved protein                                                                      |
| arCOG09879 |          |      | S | Uncharacterized conserved protein                                                                      |
| arCOG09882 | COG02192 |      | S | Uncharacterized conserved protein                                                                      |
| arCOG09883 |          |      | S | Uncharacterized conserved protein                                                                      |
| arCOG09884 |          |      | S | Uncharacterized conserved protein                                                                      |
| arCOG09923 |          |      | S | Uncharacterized conserved protein                                                                      |
| arCOG09924 |          |      | S | Uncharacterized conserved protein                                                                      |
| arCOG09928 |          |      | S | Uncharacterized conserved protein                                                                      |
| arCOG09933 |          |      | S | Uncharacterized conserved protein                                                                      |
| arCOG09934 |          |      | S | Uncharacterized conserved protein                                                                      |
| arCOG09948 |          |      | S | Uncharacterized conserved protein                                                                      |
| arCOG09962 |          |      | S | Uncharacterized conserved protein                                                                      |
| arCOG09968 |          |      | S | Uncharacterized conserved protein                                                                      |
| arCOG09969 |          |      | S | Uncharacterized conserved protein                                                                      |
| arCOG09989 |          |      | S | Uncharacterized conserved protein                                                                      |
| arCOG09991 |          |      | S | Uncharacterized conserved protein                                                                      |
| arCOG10005 |          |      | S | Uncharacterized conserved protein                                                                      |
| arCOG10007 | COG00829 |      | S | Uncharacterized conserved protein                                                                      |
| arCOG10013 |          |      | S | Uncharacterized conserved protein                                                                      |
| arCOG10014 |          |      | S | Uncharacterized conserved protein                                                                      |
| arCOG10015 | COG04278 | -    | S | Uncharacterized conserved protein                                                                      |
| arCOG10016 |          |      | S | Uncharacterized conserved protein                                                                      |
| arCOG10022 |          |      | S | Uncharacterized conserved protein                                                                      |
| arCOG10266 |          |      | S | Uncharacterized conserved protein                                                                      |
| arCOG10299 |          |      | S | Uncharacterized conserved protein                                                                      |
| arCOG10433 |          |      | S | Uncharacterized conserved protein                                                                      |
| arCOG10507 |          |      | S | Uncharacterized conserved protein                                                                      |
| arCOG10885 |          |      | S | Uncharacterized conserved protein                                                                      |
| arCOG11006 |          |      | S | Uncharacterized conserved protein                                                                      |
| arCOG11043 |          |      | S | Uncharacterized conserved protein                                                                      |
| arCOG11294 |          |      | S | Uncharacterized conserved protein                                                                      |
| arCOG11295 |          |      | S | Uncharacterized conserved protein                                                                      |
| arCOG11298 |          |      | S | Uncharacterized conserved protein                                                                      |
| arCOG11361 |          |      | S | Uncharacterized conserved protein                                                                      |
| arCOG01740 | COG00681 | LepB | U | Signal peptidase I                                                                                     |
| arCOG00208 | COG01131 | CcmA | V | ABC-type multidrug transport system,<br>ATPase component                                               |
| arCOG00716 | COG01848 | -    | V | PIN domain containing protein                                                                          |

|            |          |           |   |                                                                  |
|------------|----------|-----------|---|------------------------------------------------------------------|
| arCOG02227 | COG01487 | VapC      | V | PIN domain containing protein                                    |
| arCOG02658 | COG01337 | Cas7/Csm3 | V | CRISPR system related protein, RAMP superfamily Cas7 group       |
| arCOG02661 | COG01604 | Cas7/Cmr6 | V | CRISPR system related protein, RAMP superfamily Cas7 group       |
| arCOG03437 | COG01517 |           | V | CRISPR system related protein, COG1517 family                    |
| arCOG03891 | COG01367 | Cas7/Cmr1 | V | CRISPR system related protein, RAMP superfamily Cas7 group       |
| arCOG03893 | COG01367 | Cas7/Cmr1 | V | CRISPR system related protein, RAMP superfamily Cas7 group       |
| arCOG06024 |          | Cas5/Cmr3 | V | CRISPR-associated protein, RAMP family Cas5 group                |
| arCOG07186 |          |           | V | PIN domain                                                       |
| arCOG07248 |          |           | V | PIN domain                                                       |
| arCOG07297 |          |           | V | CRISPR associated protein                                        |
| arCOG07736 |          |           | V | TOPRIM domain containing protein, predicted phage defense system |
| arCOG07846 | COG01604 | Cas7/Cmr6 | V | CRISPR system related protein, RAMP superfamily Cas7 group       |
| arCOG08378 |          |           | V | CopG/RHH family DNA binding protein                              |
| arCOG08805 | COG05304 |           | V | CopG/RHH family DNA binding protein                              |

**Loss in other Sulfolobales**

|            |          |       |   |                                                                  |
|------------|----------|-------|---|------------------------------------------------------------------|
| arCOG00934 | COG01313 | PflX  | C | Radical SAM superfamily enzyme                                   |
| arCOG01550 | COG00374 | HyaB  | C | Ni,Fe-hydrogenase I large subunit                                |
| arCOG02474 | COG01740 | HyaA  | C | Ni,Fe-hydrogenase I small subunit                                |
| arCOG00143 | COG00477 | ProP  | G | Permease of the major facilitator superfamily                    |
| arCOG03664 | COG01215 |       | G | Glycosyltransferase                                              |
| arCOG00462 | COG01194 | MutY  | L | A/G-specific DNA glycosylase                                     |
| arCOG02079 | COG01361 | -     | M | S-layer domain                                                   |
| arCOG04400 | COG01361 | -     | M | S-layer domain                                                   |
| arCOG01187 | COG00068 | HypF  | O | Hydrogenase maturation factor                                    |
| arCOG04427 | COG00298 | HypC  | O | Hydrogenase maturation factor                                    |
| arCOG04428 | COG00409 | HypD  | O | Hydrogenase maturation factor                                    |
| arCOG00940 | COG00535 | -     | R | Radical SAM superfamily enzyme                                   |
| arCOG00968 | COG02428 | -     | R | Alpha/beta-knot SAM-dependent RNA methyltransferase              |
| arCOG01423 | COG05493 | -     | R | RecB-like nuclease fused to coiled-coil domain                   |
| arCOG06089 |          |       | R | SAM-dependent methyltransferase                                  |
| arCOG03812 | COG03463 | -     | S | Predicted membrane protein                                       |
| arCOG06072 |          |       | S | Uncharacterized conserved protein                                |
| arCOG05482 | COG00467 | RAD55 | T | RecA-superfamily ATPase implicated in signal transduction        |
| arCOG02632 | COG00286 | HsdM  | V | Type I restriction-modification system methyltransferase subunit |

## Ancestral Genes in Sulfolobales

| <b>arCOG Family</b> | <b>present in Acd1</b> | <b>COG correspondence</b> | <b>Gene Name</b> |
|---------------------|------------------------|---------------------------|------------------|
| arCOG00001          | no                     | COG01695                  |                  |
| arCOG00002          | Yes                    | COG01695                  |                  |
| arCOG00009          | Yes                    | COG00531                  | PotE             |
| arCOG00014          | Yes                    | COG00524                  | RbsK             |
| arCOG00016          | Yes                    | COG00524                  | RbsK             |
| arCOG00017          | Yes                    | COG02522                  |                  |
| arCOG00018          | Yes                    | COG00063                  |                  |
| arCOG00020          | Yes                    | COG00351                  | ThiD             |
| arCOG00021          | Yes                    | COG01992                  |                  |
| arCOG00023          | no                     | COG02522                  |                  |
| arCOG00024          | no                     | COG00554                  | GlpK             |
| arCOG00025          | no                     | COG01070                  | XylB             |
| arCOG00029          | Yes                    | COG00461                  | PyrE             |
| arCOG00031          | Yes                    | COG00503                  | Apt              |
| arCOG00033          | Yes                    | COG02520                  | Trm5             |
| arCOG00034          | Yes                    | COG00311                  | PDX2             |
| arCOG00035          | Yes                    | COG02102                  |                  |
| arCOG00038          | Yes                    | COG00301                  | Thil             |
| arCOG00039          | Yes                    | COG00603                  |                  |
| arCOG00040          | Yes                    | COG02236                  |                  |
| arCOG00042          | Yes                    | COG00037                  | MesJ             |
| arCOG00047          | Yes                    | COG01041                  |                  |
| arCOG00050          | Yes                    | COG00421                  | SpeE             |
| arCOG00052          | Yes                    | COG00166                  | Pgi              |
| arCOG00053          | Yes                    | COG00269                  | SgbH             |
| arCOG00057          | Yes                    | COG00449                  | GlmS             |
| arCOG00059          | no                     | COG02222                  | AgaS             |
| arCOG00060          | Yes                    | COG00626                  | MetC             |
| arCOG00062          | Yes                    | COG00388                  |                  |
| arCOG00063          | Yes                    | COG00504                  | PyrG             |
| arCOG00064          | Yes                    | COG00505                  | CarA             |
| arCOG00065          | Yes                    | COG00520                  | csdA             |
| arCOG00067          | Yes                    | COG00462                  | PrsA             |
| arCOG00068          | Yes                    | COG00794                  | GutQ             |
| arCOG00069          | Yes                    | COG00171                  | NadE             |
| arCOG00070          | Yes                    | COG00112                  | GlyA             |
| arCOG00076          | Yes                    | COG01003                  | GcvP             |
| arCOG00077          | Yes                    | COG00403                  | GcvP             |
| arCOG00078          | Yes                    | COG01889                  | NOP1             |
| arCOG00081          | Yes                    | COG00284                  | PyrF             |
| arCOG00082          | Yes                    | COG00075                  |                  |
| arCOG00084          | Yes                    | COG01818                  |                  |
| arCOG00085          | Yes                    | COG00519                  | GuaA             |
| arCOG00086          | Yes                    | COG00512                  | PabA             |
| arCOG00087          | Yes                    | COG00518                  | GuaA             |
| arCOG00089          | Yes                    | COG00118                  | HisH             |

|            |     |          |      |
|------------|-----|----------|------|
| arCOG00090 | no  | COG00518 | GuaA |
| arCOG00093 | Yes | COG00034 | PurF |
| arCOG00094 | Yes | COG00034 | PurF |
| arCOG00095 | Yes | COG00067 | GltB |
| arCOG00096 | Yes | COG00070 | GltB |
| arCOG00102 | Yes | COG00047 | PurL |
| arCOG00105 | Yes | COG01492 | CobQ |
| arCOG00106 | Yes | COG01797 | CobB |
| arCOG00109 | Yes | COG02890 | HemK |
| arCOG00110 | Yes | COG02813 | RsmC |
| arCOG00112 | Yes | COG00137 | ArgG |
| arCOG00115 | no  | COG00863 |      |
| arCOG00124 | no  | COG00175 | CysH |
| arCOG00130 | Yes | COG00477 | ProP |
| arCOG00131 | Yes | COG00477 | ProP |
| arCOG00132 | Yes | COG00477 | ProP |
| arCOG00135 | no  | COG00477 | ProP |
| arCOG00138 | Yes | COG00477 | ProP |
| arCOG00140 | no  | COG00477 | ProP |
| arCOG00144 | Yes | COG00477 | ProP |
| arCOG00147 | Yes | COG00477 | ProP |
| arCOG00150 | no  | COG01653 | UgpB |
| arCOG00153 | no  | COG01653 | UgpB |
| arCOG00154 | no  | COG02182 | MalE |
| arCOG00156 | no  | COG01653 | UgpB |
| arCOG00157 | no  | COG01175 | UgpA |
| arCOG00158 | no  | COG00395 | UgpE |
| arCOG00159 | no  | COG00395 | UgpE |
| arCOG00160 | no  | COG03833 | MalG |
| arCOG00164 | Yes | COG00555 | CysU |
| arCOG00167 | Yes | COG00573 | PstC |
| arCOG00168 | Yes | COG00581 | PstA |
| arCOG00174 | Yes | COG04986 |      |
| arCOG00175 | no  | COG03839 | MalK |
| arCOG00177 | no  | COG03842 | PotA |
| arCOG00181 | Yes | COG00444 | DppD |
| arCOG00182 | no  | COG00444 | DppD |
| arCOG00184 | Yes | COG04608 | AppF |
| arCOG00185 | no  | COG01123 |      |
| arCOG00187 | Yes | COG01245 |      |
| arCOG00188 | no  | COG01122 | CbiO |
| arCOG00193 | Yes | COG01116 | TauB |
| arCOG00194 | Yes | COG01131 | CcmA |
| arCOG00196 | Yes | COG01131 | CcmA |
| arCOG00198 | Yes | COG01120 | FepC |
| arCOG00204 | no  | COG04608 | AppF |
| arCOG00208 | no  | COG01131 | CcmA |
| arCOG00213 | Yes | COG00226 | PstS |

|            |     |          |      |
|------------|-----|----------|------|
| arCOG00214 | Yes | COG00521 | MoaB |
| arCOG00215 | Yes | COG01058 | CinA |
| arCOG00216 | Yes | COG00303 | MoeA |
| arCOG00217 | no  | COG00303 | MoeA |
| arCOG00219 | Yes | COG00725 | ModA |
| arCOG00223 | Yes | COG02005 | ModE |
| arCOG00231 | Yes | COG01117 | PstB |
| arCOG00235 | Yes | COG00179 | MhpD |
| arCOG00236 | no  | COG03970 |      |
| arCOG00238 | Yes | COG01055 | ArsB |
| arCOG00239 | no  | COG01024 | CaiD |
| arCOG00242 | Yes | COG01024 | CaiD |
| arCOG00245 | Yes | COG00287 | TyrA |
| arCOG00246 | no  | COG00039 | Mdh  |
| arCOG00247 | Yes | COG02084 | MmsB |
| arCOG00249 | Yes | COG01250 | FadB |
| arCOG00251 | Yes | COG01250 | FadB |
| arCOG00253 | no  | COG01004 | Ugd  |
| arCOG00255 | Yes | COG00077 | PheA |
| arCOG00263 | no  | COG01172 | AraH |
| arCOG00264 | Yes | COG02041 |      |
| arCOG00266 | no  | COG02041 |      |
| arCOG00271 | Yes | COG00697 | RhaT |
| arCOG00279 | Yes | COG01586 | SpeD |
| arCOG00280 | Yes | COG00433 |      |
| arCOG00283 | Yes | COG00433 |      |
| arCOG00284 | Yes | COG00433 |      |
| arCOG00285 | Yes | COG00433 |      |
| arCOG00286 | Yes | COG00433 |      |
| arCOG00287 | Yes | SC.00240 |      |
| arCOG00288 | Yes | COG00778 | NfnB |
| arCOG00302 | Yes | COG00613 |      |
| arCOG00307 | Yes | COG01603 | RPP1 |
| arCOG00310 | Yes | COG01225 | Bcp  |
| arCOG00312 | Yes | COG00450 | AhpC |
| arCOG00317 | Yes | COG04847 |      |
| arCOG00318 | Yes | COG00704 | PhoU |
| arCOG00320 | no  | COG00704 | PhoU |
| arCOG00321 | Yes | COG00312 | TldD |
| arCOG00322 | Yes | COG00312 | TldD |
| arCOG00323 | no  | COG00312 | TldD |
| arCOG00324 | Yes | COG00123 | AcuC |
| arCOG00326 | Yes | COG00123 | AcuC |
| arCOG00328 | Yes | COG00417 | PolB |
| arCOG00329 | Yes | COG00417 | PolB |
| arCOG00332 | Yes | COG00247 | GlpC |
| arCOG00333 | Yes | COG00247 | GlpC |
| arCOG00335 | Yes | COG01139 |      |



|            |     |          |            |
|------------|-----|----------|------------|
| arCOG00337 | Yes | COG00277 | GlcD       |
| arCOG00338 | Yes | COG02048 | SdhC       |
| arCOG00340 | Yes | COG00277 | GlcD       |
| arCOG00341 | no  | COG00277 | GlcD       |
| arCOG00342 | Yes | COG02048 | HdrB       |
| arCOG00343 | Yes | COG00247 | GlpC       |
| arCOG00344 | Yes | COG00277 | GlcD       |
| arCOG00345 | Yes | COG00277 | GlcD       |
| arCOG00347 | Yes | COG01938 |            |
| arCOG00350 | Yes | COG01161 |            |
| arCOG00352 | Yes | COG01084 |            |
| arCOG00353 | Yes | COG02262 | HflX       |
| arCOG00357 | Yes | COG00012 |            |
| arCOG00358 | Yes | COG01163 | DRG        |
| arCOG00367 | Yes | COG01630 |            |
| arCOG00368 | Yes | COG00419 | SbcC       |
| arCOG00373 | Yes | COG01196 |            |
| arCOG00374 | no  | COG02512 |            |
| arCOG00385 | no  |          |            |
| arCOG00393 | Yes | COG02512 |            |
| arCOG00394 | no  | COG00640 | ArsR       |
| arCOG00397 | Yes | COG00420 | SbcD       |
| arCOG00401 | Yes | COG00441 | ThrS       |
| arCOG00402 | Yes | COG00442 | ProS       |
| arCOG00403 | Yes | COG00172 | SerS       |
| arCOG00404 | Yes | COG00124 | HisS       |
| arCOG00405 | Yes | COG00423 | GRS1       |
| arCOG00406 | Yes | COG00017 | AsnS       |
| arCOG00408 | Yes | COG01190 | LysU       |
| arCOG00410 | Yes | COG00016 | PheS       |
| arCOG00412 | Yes | COG00072 | PheT       |
| arCOG00415 | Yes | COG00468 | RecA       |
| arCOG00417 | Yes | COG00468 | RecA       |
| arCOG00419 | Yes | COG00537 | Hit        |
| arCOG00423 | Yes | COG02404 |            |
| arCOG00427 | Yes | COG00608 | RecJ/Cdc45 |
| arCOG00434 | no  | COG00714 |            |
| arCOG00436 | Yes | COG00714 |            |
| arCOG00439 | Yes | COG01241 | MCM2       |
| arCOG00442 | Yes | COG02425 |            |
| arCOG00446 | no  | COG02086 | FixA       |
| arCOG00447 | no  | COG02025 | FixB       |
| arCOG00448 | no  | COG02086 | FixA       |
| arCOG00452 | Yes | COG05491 | ESCRTIII   |
| arCOG00453 | Yes | COG05491 | ESCRTIII   |
| arCOG00454 | Yes | COG05491 | ESCRTIII   |
| arCOG00455 | no  | COG00345 | ProC       |
| arCOG00458 | Yes | COG01913 |            |

|            |     |          |      |
|------------|-----|----------|------|
| arCOG00459 | Yes | COG00177 | Nth  |
| arCOG00461 | Yes | COG02231 |      |
| arCOG00463 | Yes | COG01833 |      |
| arCOG00467 | Yes | COG01474 | CDC6 |
| arCOG00469 | Yes | COG00470 | HolB |
| arCOG00470 | Yes | COG00470 | HolB |
| arCOG00474 | Yes | COG00212 |      |
| arCOG00475 | Yes | COG00685 | MetF |
| arCOG00476 | Yes | COG00382 | UbiA |
| arCOG00477 | Yes | COG00382 | UbiA |
| arCOG00479 | Yes | COG00109 | CyoE |
| arCOG00486 | Yes | COG00215 | CysS |
| arCOG00487 | Yes | COG00018 | ArgS |
| arCOG00488 | Yes | COG00592 | DnaN |
| arCOG00489 | Yes | COG02096 |      |
| arCOG00492 | Yes | COG01167 | ARO8 |
| arCOG00493 | Yes | COG00057 | GapA |
| arCOG00494 | Yes | COG00136 | Asd  |
| arCOG00495 | Yes | COG00002 | ArgC |
| arCOG00496 | Yes | COG00126 | Pgk  |
| arCOG00497 | Yes | COG02220 |      |
| arCOG00498 | no  | COG00491 | GloB |
| arCOG00500 | Yes | COG01234 | ElaC |
| arCOG00501 | Yes | COG01234 | ElaC |
| arCOG00503 | Yes | COG01237 |      |
| arCOG00504 | Yes | COG00491 | GloB |
| arCOG00505 | no  | COG00491 | GloB |
| arCOG00506 | Yes | COG00426 | FpaA |
| arCOG00507 | no  | COG00491 | GloB |
| arCOG00510 | no  | COG00655 | WrbA |
| arCOG00511 | no  | COG00491 | GloB |
| arCOG00517 | no  | COG00491 | GloB |
| arCOG00532 | Yes | COG01763 | MobB |
| arCOG00534 | Yes | COG00314 | MoaE |
| arCOG00535 | Yes | COG02104 | ThiS |
| arCOG00536 | Yes | COG01977 | MoaD |
| arCOG00540 | no  | COG05131 | URM1 |
| arCOG00541 | Yes | COG01236 | YSH1 |
| arCOG00543 | Yes | COG01782 |      |
| arCOG00545 | Yes | COG01236 | YSH1 |
| arCOG00551 | Yes | COG01711 |      |
| arCOG00553 | Yes | COG01204 |      |
| arCOG00555 | Yes | COG01205 |      |
| arCOG00557 | Yes | COG01201 | Lhr  |
| arCOG00558 | no  | COG00513 | SrmB |
| arCOG00561 | Yes | COG04346 |      |
| arCOG00569 | Yes |          |      |
| arCOG00570 | Yes | COG00644 | FixC |

|            |     |          |         |
|------------|-----|----------|---------|
| arCOG00571 | Yes | COG01053 | SdhA    |
| arCOG00572 | Yes | COG00029 | NadB    |
| arCOG00574 | Yes | COG01635 |         |
| arCOG00576 | no  | COG00428 |         |
| arCOG00578 | Yes | COG01645 |         |
| arCOG00579 | Yes | COG01594 | RPB9    |
| arCOG00580 | Yes | COG01594 | RPB9    |
| arCOG00581 | no  | COG02513 | PrpB    |
| arCOG00583 | no  | COG02224 | AceA    |
| arCOG00584 | Yes | COG00413 | PanB    |
| arCOG00585 | Yes | COG00489 | Mrp     |
| arCOG00586 | Yes | COG01192 | Soj     |
| arCOG00589 | no  | COG00455 |         |
| arCOG00600 | Yes | COG00517 |         |
| arCOG00601 | Yes | COG00517 |         |
| arCOG00603 | Yes | COG00167 | PyrD    |
| arCOG00606 | no  | COG00517 |         |
| arCOG00608 | no  | COG03620 |         |
| arCOG00610 | Yes | COG02524 |         |
| arCOG00613 | Yes | COG01304 | idi     |
| arCOG00614 | Yes | COG01994 | SpoIVFB |
| arCOG00615 | no  | COG01902 | NemA    |
| arCOG00617 | Yes | COG00107 | HisF    |
| arCOG00618 | Yes | COG00106 | HisA    |
| arCOG00619 | Yes | COG00069 | GltB    |
| arCOG00625 | no  | COG02239 | MgtE    |
| arCOG00631 | Yes | COG00517 |         |
| arCOG00636 | Yes | COG00309 | HypE    |
| arCOG00637 | Yes | COG01973 | HypE    |
| arCOG00638 | Yes | COG00611 | ThiL    |
| arCOG00639 | Yes | COG00150 | PurM    |
| arCOG00641 | Yes | COG00046 | PurL    |
| arCOG00643 | Yes | COG00709 | SelD    |
| arCOG00644 | Yes | COG00007 | CysG    |
| arCOG00645 | Yes | COG02875 | CobM    |
| arCOG00646 | no  | COG00007 | CysG    |
| arCOG00647 | Yes | COG01010 | CobJ    |
| arCOG00648 | Yes | COG02243 | CobF    |
| arCOG00650 | Yes | COG02241 | CobL    |
| arCOG00651 | Yes | COG02073 | CbiG    |
| arCOG00652 | Yes | COG02073 | CbiG    |
| arCOG00654 | no  | COG02107 |         |
| arCOG00660 | no  | COG00320 | LipA    |
| arCOG00662 | Yes | COG02516 |         |
| arCOG00663 | Yes | COG01208 | GCD1    |
| arCOG00664 | Yes | COG01209 | RfbA    |
| arCOG00665 | no  | COG01210 | GalU    |
| arCOG00666 | Yes | COG01208 | GCD1    |

|            |     |          |          |
|------------|-----|----------|----------|
| arCOG00667 | Yes | COG01209 | RfbA     |
| arCOG00670 | Yes | COG00558 | PgsA     |
| arCOG00675 | Yes | COG01095 | RPB7     |
| arCOG00676 | Yes | COG01096 |          |
| arCOG00678 | Yes | COG01097 | RRP4     |
| arCOG00679 | Yes | COG00675 |          |
| arCOG00680 | no  | COG00675 |          |
| arCOG00683 | no  | COG00675 |          |
| arCOG00684 | no  | COG00675 |          |
| arCOG00689 | Yes | COG00044 | PyrC     |
| arCOG00692 | Yes | COG00402 | SsnA     |
| arCOG00695 | Yes | COG00402 | SsnA     |
| arCOG00696 | no  | COG01228 | HutI     |
| arCOG00697 | no  | COG00402 | SsnA     |
| arCOG00698 | no  | COG00804 | UreC     |
| arCOG00699 | no  | COG01820 | NagA     |
| arCOG00701 | no  | COG00584 | UgpQ     |
| arCOG00713 | Yes | COG01848 |          |
| arCOG00715 | Yes | COG01848 |          |
| arCOG00716 | no  | COG01848 |          |
| arCOG00721 | Yes | COG01439 | Nob1     |
| arCOG00723 | no  | COG05483 |          |
| arCOG00724 | Yes | COG01695 |          |
| arCOG00726 | no  | COG04113 |          |
| arCOG00727 | no  | COG04113 |          |
| arCOG00729 | Yes | COG04113 |          |
| arCOG00731 | Yes | COG00640 | ArsR     |
| arCOG00732 | no  | COG01846 | MarR     |
| arCOG00744 | Yes |          |          |
| arCOG00748 | no  | COG01173 | DppC     |
| arCOG00749 | Yes | COG01173 | DppC     |
| arCOG00751 | Yes | COG00601 | DppB     |
| arCOG00753 | no  | COG00578 | GlpA     |
| arCOG00755 | Yes | COG00665 | DadA     |
| arCOG00756 | Yes | COG00404 | GcvT     |
| arCOG00758 | Yes | COG00665 | DadA     |
| arCOG00759 | no  | COG00665 | DadA     |
| arCOG00760 | no  | COG02301 | Mcl/CitE |
| arCOG00761 | no  | COG01720 |          |
| arCOG00767 | Yes | COG01109 | {ManB}   |
| arCOG00769 | Yes | COG00693 | ThiJ     |
| arCOG00770 | Yes | COG01199 | DinG     |
| arCOG00773 | Yes | COG01607 |          |
| arCOG00774 | no  | COG02030 | Mch      |
| arCOG00777 | Yes | COG02050 | Paal     |
| arCOG00779 | Yes | COG00200 | RplO     |
| arCOG00780 | Yes | COG01727 | RPL18A   |
| arCOG00781 | Yes | COG01717 | RPL32    |

|            |     |          |      |
|------------|-----|----------|------|
| arCOG00782 | Yes | COG00199 | RpsN |
| arCOG00784 | Yes | COG01588 | POP4 |
| arCOG00785 | Yes | COG00255 | RpmC |
| arCOG00786 | no  | COG01468 | Cas4 |
| arCOG00790 | Yes | COG01468 | Cas4 |
| arCOG00792 | Yes | COG01112 |      |
| arCOG00807 | Yes | COG00060 | IleS |
| arCOG00808 | Yes | COG00525 | ValS |
| arCOG00809 | Yes | COG00495 | LeuS |
| arCOG00810 | Yes | COG00143 | MetG |
| arCOG00812 | Yes | COG02002 | AbrB |
| arCOG00815 | Yes | COG02002 | AbrB |
| arCOG00816 | no  | COG02002 | AbrB |
| arCOG00817 | Yes | COG02002 | AbrB |
| arCOG00818 | no  | COG02002 | AbrB |
| arCOG00820 | no  | COG02002 | AbrB |
| arCOG00823 | Yes | COG02002 | AbrB |
| arCOG00824 | Yes | COG02002 | AbrB |
| arCOG00825 | no  | COG02002 | AbrB |
| arCOG00826 | no  | COG00454 | WecD |
| arCOG00833 | Yes | COG00456 | RimI |
| arCOG00837 | no  | COG00456 | RimI |
| arCOG00853 | Yes | COG00281 | SfcA |
| arCOG00856 | no  | COG00318 | CaiC |
| arCOG00857 | Yes | COG00318 | CaiC |
| arCOG00858 | Yes | COG00528 | PyrH |
| arCOG00860 | no  | COG01608 |      |
| arCOG00861 | Yes | COG00527 | LysC |
| arCOG00862 | Yes | COG00548 | ArgB |
| arCOG00865 | Yes | COG01156 | NtpB |
| arCOG00868 | Yes | COG01155 | NtpA |
| arCOG00869 | Yes | COG01390 | NtpE |
| arCOG00871 | no  | COG00553 | HepA |
| arCOG00874 | Yes | COG01061 | xpb  |
| arCOG00877 | no  | COG01061 | SSL2 |
| arCOG00883 | no  | COG00553 | HepA |
| arCOG00887 | no  | COG01483 |      |
| arCOG00889 | no  | COG01743 |      |
| arCOG00890 | no  | COG00863 |      |
| arCOG00891 | Yes | COG00084 | TatD |
| arCOG00894 | no  | COG00463 | WcaA |
| arCOG00895 | Yes | COG00463 | WcaA |
| arCOG00905 | Yes | COG01573 |      |
| arCOG00906 | Yes | COG02260 |      |
| arCOG00910 | Yes | COG02263 |      |
| arCOG00911 | Yes | COG00540 | PyrB |
| arCOG00912 | Yes | COG00078 | ArgF |
| arCOG00914 | Yes | COG04992 | ArgD |

|            |     |          |       |
|------------|-----|----------|-------|
| arCOG00915 | no  | COG00160 | GabT  |
| arCOG00916 | Yes | COG00160 | GabT  |
| arCOG00918 | Yes | COG00001 | HemL  |
| arCOG00919 | Yes | COG01591 |       |
| arCOG00922 | Yes | COG01136 | SalX  |
| arCOG00924 | no  | COG00410 | LivF  |
| arCOG00925 | no  | COG00411 | LivG  |
| arCOG00928 | Yes | COG01628 |       |
| arCOG00929 | Yes | COG01515 | Nfi   |
| arCOG00930 | Yes | COG02896 | MoaA  |
| arCOG00931 | no  | COG00535 |       |
| arCOG00932 | Yes | COG02108 |       |
| arCOG00933 | Yes | COG01964 |       |
| arCOG00938 | no  | COG00535 |       |
| arCOG00945 | Yes | COG00641 | AslB  |
| arCOG00946 | Yes | COG01180 | PflA  |
| arCOG00959 | no  | COG01146 |       |
| arCOG00962 | Yes | COG00479 | FrdB  |
| arCOG00965 | Yes | COG01150 | HdrC  |
| arCOG00966 | Yes | COG01150 | HdrC  |
| arCOG00967 | Yes | COG02419 |       |
| arCOG00969 | Yes | COG02248 |       |
| arCOG00970 | Yes | COG00638 | PRE1  |
| arCOG00971 | Yes | COG00638 | PRE1  |
| arCOG00972 | Yes | COG01056 | NadR  |
| arCOG00973 | Yes | COG00144 | Sun   |
| arCOG00975 | Yes | COG00144 | Sun   |
| arCOG00976 | Yes | COG02518 | Pcm   |
| arCOG00977 | Yes | COG02242 | CobL  |
| arCOG00978 | Yes | COG02519 | GCD14 |
| arCOG00980 | Yes | COG01047 | SlpA  |
| arCOG00982 | Yes | COG00371 | GldA  |
| arCOG00983 | Yes | COG00337 | AroB  |
| arCOG00984 | no  | COG01454 | EutG  |
| arCOG00985 | Yes | COG02016 |       |
| arCOG00986 | Yes | COG00144 | Sun   |
| arCOG00987 | Yes | COG00130 | TruB  |
| arCOG00989 | Yes | COG00343 | Tgt   |
| arCOG00991 | Yes | COG01370 |       |
| arCOG00993 | Yes | COG01374 | NIP7  |
| arCOG00995 | no  | COG01549 |       |
| arCOG00996 | no  | COG00343 | Tgt   |
| arCOG00998 | Yes | COG01958 | LSM1  |
| arCOG00999 | Yes | COG01958 | LSM1  |
| arCOG01000 | Yes | COG00006 | PepP  |
| arCOG01001 | Yes | COG00024 | Map   |
| arCOG01004 | no  | COG02421 |       |
| arCOG01007 | Yes | COG00609 | FepD  |

|            |     |          |       |
|------------|-----|----------|-------|
| arCOG01008 | no  | COG00864 | NikR  |
| arCOG01009 | Yes | COG03609 |       |
| arCOG01010 | Yes | COG02161 | StbD  |
| arCOG01013 | no  | COG04352 |       |
| arCOG01015 | Yes | COG01258 |       |
| arCOG01016 | Yes | COG01460 | Rpo4  |
| arCOG01018 | Yes | COG00565 | LasT  |
| arCOG01019 | Yes | COG04080 |       |
| arCOG01021 | no  | COG00683 | LivK  |
| arCOG01025 | Yes | COG01685 |       |
| arCOG01026 | Yes | COG01907 |       |
| arCOG01027 | Yes | COG00083 | ThrB  |
| arCOG01028 | Yes | COG01577 | ERG12 |
| arCOG01032 | Yes | COG03890 | ERG8  |
| arCOG01033 | Yes | COG00169 | AroE  |
| arCOG01034 | Yes | COG01618 |       |
| arCOG01035 | Yes | COG02423 |       |
| arCOG01036 | Yes | COG00373 | HemA  |
| arCOG01037 | Yes | COG01102 | Cmk   |
| arCOG01038 | Yes | COG01936 |       |
| arCOG01039 | Yes | COG02019 | AdkA  |
| arCOG01042 | Yes | COG01325 |       |
| arCOG01043 | Yes | COG01931 |       |
| arCOG01044 | Yes | COG01648 | CysG  |
| arCOG01045 | Yes | COG00237 | CoaE  |
| arCOG01049 | Yes | COG02876 | AroA  |
| arCOG01051 | Yes | COG03958 |       |
| arCOG01052 | no  | COG00022 | AcoB  |
| arCOG01053 | Yes | COG03959 |       |
| arCOG01054 | no  | COG01071 | AcoA  |
| arCOG01055 | Yes | COG03432 |       |
| arCOG01057 | no  | COG01733 |       |
| arCOG01064 | Yes | COG00446 | HcaD  |
| arCOG01065 | Yes | COG00446 | HcaD  |
| arCOG01067 | no  | COG01252 | Ndh   |
| arCOG01068 | Yes | COG01249 | Lpd   |
| arCOG01069 | Yes | COG00446 |       |
| arCOG01070 | no  | COG00446 | HcaD  |
| arCOG01072 | Yes | COG00494 | MutT  |
| arCOG01073 | Yes | COG00494 | MutT  |
| arCOG01074 | Yes | COG00494 | MutT  |
| arCOG01075 | Yes | COG01051 |       |
| arCOG01084 | Yes | COG01694 | MazG  |
| arCOG01085 | Yes | COG01646 |       |
| arCOG01086 | Yes | COG00159 | TrpA  |
| arCOG01087 | Yes | COG00149 | TpiA  |
| arCOG01088 | Yes | COG00134 | TrpC  |
| arCOG01091 | Yes | COG01814 |       |

|            |     |          |           |
|------------|-----|----------|-----------|
| arCOG01093 | no  | COG02406 |           |
| arCOG01096 | Yes | COG01814 |           |
| arCOG01097 | Yes | COG01592 |           |
| arCOG01098 | Yes |          |           |
| arCOG01106 | Yes |          |           |
| arCOG01107 | Yes | COG00624 | ArgE      |
| arCOG01108 | no  | COG01473 | AbgB      |
| arCOG01109 | no  | COG00624 | ArgE      |
| arCOG01110 | Yes | COG00624 | ArgE      |
| arCOG01111 | Yes | COG00574 | PpsA      |
| arCOG01114 | no  | COG00574 | PpsA      |
| arCOG01115 | Yes | COG01571 | TiaS      |
| arCOG01117 | Yes | COG01522 | Lrp       |
| arCOG01119 | no  | COG04274 |           |
| arCOG01120 | Yes | COG05431 |           |
| arCOG01122 | Yes | COG00120 | RpiA      |
| arCOG01123 | Yes | COG00182 |           |
| arCOG01128 | no  | COG00819 | TenA      |
| arCOG01129 | no  | COG00819 | TenA      |
| arCOG01130 | Yes | COG00436 |           |
| arCOG01136 | Yes | COG00073 | ARC1      |
| arCOG01137 | no  | COG00824 | FcbC      |
| arCOG01138 | Yes | COG01310 |           |
| arCOG01141 | no  | COG00622 |           |
| arCOG01143 | Yes | COG00639 | ApaH      |
| arCOG01145 | Yes | COG02129 |           |
| arCOG01147 | Yes | COG01409 |           |
| arCOG01149 | no  |          |           |
| arCOG01150 | Yes | COG01407 |           |
| arCOG01154 | Yes | COG04186 |           |
| arCOG01159 | Yes | COG01340 |           |
| arCOG01163 | Yes | COG00473 | LeuB      |
| arCOG01164 | Yes | COG00538 | Icd       |
| arCOG01165 | Yes | COG01389 |           |
| arCOG01167 | Yes | COG01529 | CoxL      |
| arCOG01168 | no  | COG04948 |           |
| arCOG01169 | Yes | COG00148 | Eno       |
| arCOG01171 | Yes | COG00467 | RAD55     |
| arCOG01179 | Yes | COG00361 | InfA      |
| arCOG01180 | Yes | COG01718 | RIO1      |
| arCOG01181 | Yes | COG00478 |           |
| arCOG01182 | Yes | COG02112 |           |
| arCOG01183 | Yes | COG00533 | Kae1/QRI7 |
| arCOG01185 | Yes | COG03642 |           |
| arCOG01186 | Yes | COG03642 |           |
| arCOG01189 | Yes | COG00661 | AarF      |
| arCOG01191 | Yes | COG02250 |           |
| arCOG01192 | Yes | COG02250 |           |



|            |     |          |           |
|------------|-----|----------|-----------|
| arCOG01195 | no  | COG01708 |           |
| arCOG01197 | no  | COG01708 |           |
| arCOG01199 | no  | COG01708 |           |
| arCOG01200 | Yes | COG01708 |           |
| arCOG01202 | no  | COG01708 |           |
| arCOG01203 | Yes | COG01708 |           |
| arCOG01204 | Yes | COG01708 |           |
| arCOG01205 | no  | COG01708 |           |
| arCOG01212 | Yes |          |           |
| arCOG01213 | Yes | COG00561 | Cof       |
| arCOG01217 | Yes | COG01400 | SEC65     |
| arCOG01218 | Yes | COG00526 | TrxA      |
| arCOG01219 | Yes | COG01867 | TRM1      |
| arCOG01221 | Yes | COG01986 |           |
| arCOG01222 | Yes | COG00615 | TagD      |
| arCOG01224 | Yes | COG01849 |           |
| arCOG01225 | Yes | COG01100 |           |
| arCOG01226 | Yes | COG01703 | ArgK      |
| arCOG01227 | Yes | COG00552 | FtsY      |
| arCOG01228 | Yes | COG00541 | Ffh       |
| arCOG01231 | no  | COG00378 | HypB      |
| arCOG01235 | no  | COG01622 | CyoA      |
| arCOG01236 | no  | COG01622 | CyoA      |
| arCOG01237 | no  | COG00843 | CyoB      |
| arCOG01238 | Yes | COG00843 | CyoB/DoxB |
| arCOG01241 | Yes | COG00582 | XerC      |
| arCOG01244 | no  | COG04342 |           |
| arCOG01247 | no  | COG04974 | XerD      |
| arCOG01252 | Yes | COG01012 | PutA      |
| arCOG01254 | Yes | COG02872 |           |
| arCOG01255 | Yes | COG00013 | AlaS      |
| arCOG01256 | no  | COG02872 |           |
| arCOG01257 | Yes | COG00459 | GroL      |
| arCOG01259 | no  | COG01028 | FabG      |
| arCOG01260 | Yes | COG01028 | FabG      |
| arCOG01262 | no  | COG01028 | FabG      |
| arCOG01263 | Yes | COG00300 | DltE      |
| arCOG01268 | Yes | COG01758 | Rpo6/RpoZ |
| arCOG01269 | no  | COG00559 | LivH      |
| arCOG01273 | no  | COG04177 | LivM      |
| arCOG01278 | Yes | COG00183 | PaaJ      |
| arCOG01279 | no  | COG00183 | PaaJ      |
| arCOG01280 | no  | COG00183 | PaaJ      |
| arCOG01281 | no  | COG00183 | PaaJ      |
| arCOG01282 | Yes | COG00183 | PaaJ      |
| arCOG01283 | no  | COG01545 |           |
| arCOG01284 | no  | COG01545 |           |
| arCOG01285 | Yes | COG01545 |           |

|            |     |          |         |
|------------|-----|----------|---------|
| arCOG01287 | no  | COG01545 |         |
| arCOG01288 | no  | COG01545 |         |
| arCOG01289 | no  | COG01545 |         |
| arCOG01290 | no  | COG01533 | SplB    |
| arCOG01292 | no  | COG00493 | GltD    |
| arCOG01296 | Yes | COG00492 | TrxB    |
| arCOG01299 | no  | COG00446 | HcaD    |
| arCOG01302 | Yes | COG01531 |         |
| arCOG01303 | Yes | COG00509 | GcvH    |
| arCOG01304 | no  | COG01637 | NucS    |
| arCOG01306 | Yes | COG01222 | RPT1    |
| arCOG01307 | Yes | COG00464 | Vps4    |
| arCOG01308 | Yes | COG00464 | Cdc48   |
| arCOG01314 | no  |          |         |
| arCOG01316 | Yes | COG00591 | PutP    |
| arCOG01320 | Yes | COG00108 | RibB    |
| arCOG01322 | Yes | COG01731 |         |
| arCOG01323 | Yes | COG00054 | RibH    |
| arCOG01324 | Yes | COG02820 | Udp     |
| arCOG01325 | no  | COG00813 | DeoD    |
| arCOG01327 | Yes | COG00005 | Pnp     |
| arCOG01331 | Yes | COG00501 | HtpX    |
| arCOG01333 | no  | COG00501 | HtpX    |
| arCOG01334 | no  | COG00501 | HtpX    |
| arCOG01336 | Yes | COG02078 | AMMECR1 |
| arCOG01337 | Yes | COG00045 | SucC    |
| arCOG01338 | Yes | COG01042 |         |
| arCOG01339 | Yes | COG00074 | SucD    |
| arCOG01340 | Yes | COG01042 |         |
| arCOG01341 | Yes | COG01730 | GIM5    |
| arCOG01342 | Yes | COG01382 | GimC    |
| arCOG01344 | Yes | COG02238 | RPS19A  |
| arCOG01346 | Yes | COG01534 |         |
| arCOG01347 | Yes | COG01793 | CDC9    |
| arCOG01348 | Yes | COG00061 | nadF    |
| arCOG01349 | Yes | COG00483 | SuhB    |
| arCOG01350 | Yes | COG03199 |         |
| arCOG01351 | Yes | COG00460 | ThrA    |
| arCOG01352 | Yes | COG00334 | GdhA    |
| arCOG01354 | Yes | COG02892 |         |
| arCOG01356 | no  | COG01032 |         |
| arCOG01357 | Yes | COG01032 |         |
| arCOG01358 | Yes | COG00621 | MiaB    |
| arCOG01361 | no  | COG01243 | ELP3    |
| arCOG01365 | Yes | COG01369 | POP5    |
| arCOG01367 | Yes | COG01091 | RfbD    |
| arCOG01369 | Yes | COG00451 | WcaG    |
| arCOG01371 | Yes | COG01088 | RfbB    |

|            |     |          |        |
|------------|-----|----------|--------|
| arCOG01377 | Yes | COG03379 |        |
| arCOG01378 | Yes | COG01524 |        |
| arCOG01381 | no  | COG00463 | WcaA   |
| arCOG01383 | no  | COG01216 |        |
| arCOG01385 | Yes | COG00463 | WcaA   |
| arCOG01389 | Yes | COG01215 |        |
| arCOG01391 | Yes | COG01215 |        |
| arCOG01394 | Yes | COG00707 | MurG   |
| arCOG01397 | Yes | COG00463 | WcaA   |
| arCOG01398 | no  | COG00463 | WcaA   |
| arCOG01400 | Yes | COG00500 |        |
| arCOG01401 | no  | COG00500 |        |
| arCOG01402 | no  | COG00500 |        |
| arCOG01403 | no  | COG00438 | RfaG   |
| arCOG01407 | no  | COG00438 | RfaG   |
| arCOG01408 | no  | COG00438 | RfaG   |
| arCOG01409 | no  | COG00438 | RfaG   |
| arCOG01411 | Yes | COG00438 | RfaG   |
| arCOG01417 | no  | COG00438 | RfaG   |
| arCOG01419 | Yes | COG00438 | RfaG   |
| arCOG01420 | Yes | COG00297 | GlgA   |
| arCOG01421 | Yes | COG00058 | GlgP   |
| arCOG01422 | no  | COG05493 |        |
| arCOG01424 | no  | SC.00001 |        |
| arCOG01425 | no  | SC.00001 |        |
| arCOG01426 | no  | SC.00001 |        |
| arCOG01430 | Yes | COG00031 | CysK   |
| arCOG01431 | Yes | COG01171 | IlvA   |
| arCOG01432 | Yes | COG01350 |        |
| arCOG01434 | Yes | COG00498 | ThrC   |
| arCOG01439 | no  | COG05551 | Cas6   |
| arCOG01440 | Yes | COG05551 | Cas6   |
| arCOG01442 | no  | COG02254 |        |
| arCOG01443 | no  | COG02254 | Cas3'' |
| arCOG01444 | no  | COG01203 | Cas3   |
| arCOG01446 | Yes | COG00640 | ArsR   |
| arCOG01452 | Yes | COG01518 | Cas1   |
| arCOG01455 | Yes | COG01064 | AdhP   |
| arCOG01456 | Yes | COG01062 | AdhC   |
| arCOG01457 | Yes | COG01064 | AdhP   |
| arCOG01458 | no  | COG00604 | Qor    |
| arCOG01459 | Yes | COG01063 | Tdh    |
| arCOG01462 | Yes | COG01668 | NatB   |
| arCOG01463 | Yes | COG00842 |        |
| arCOG01465 | no  | COG00842 |        |
| arCOG01467 | Yes | COG00842 |        |
| arCOG01468 | no  | COG00842 |        |
| arCOG01469 | no  | COG00842 |        |

|            |     |          |        |
|------------|-----|----------|--------|
| arCOG01471 | no  | COG03945 |        |
| arCOG01477 | no  | COG01230 | CzcD   |
| arCOG01478 | no  | COG00053 | MMT1   |
| arCOG01481 | Yes | COG01488 | PncB   |
| arCOG01482 | Yes | COG00157 | NadC   |
| arCOG01484 | Yes | COG01985 | RibD   |
| arCOG01491 | Yes | COG00243 | BisC   |
| arCOG01492 | Yes | COG03383 |        |
| arCOG01495 | no  | COG00243 | BisC   |
| arCOG01496 | Yes | COG00243 | BisC   |
| arCOG01500 | Yes | COG00437 | HybA   |
| arCOG01503 | no  | COG00437 | HybA   |
| arCOG01505 | Yes | COG03381 | TorD   |
| arCOG01506 | no  | COG03381 | TorD   |
| arCOG01510 | Yes | COG01599 | RFA1   |
| arCOG01511 | no  | COG00145 | HyuA   |
| arCOG01512 | no  | COG00146 | HyuB   |
| arCOG01521 | Yes | COG01233 |        |
| arCOG01526 | Yes | COG01110 |        |
| arCOG01527 | Yes | COG00550 | TopA   |
| arCOG01529 | Yes | COG00365 | Acs    |
| arCOG01530 | Yes | COG00315 | MoaC   |
| arCOG01531 | Yes |          |        |
| arCOG01532 | Yes | COG00020 | UppS   |
| arCOG01533 | no  | COG00747 | DdpA   |
| arCOG01534 | no  | COG00747 | DdpA   |
| arCOG01535 | no  | COG00747 | DdpA   |
| arCOG01537 | Yes | COG00651 | NuoM   |
| arCOG01539 | Yes | COG01009 | NuoL   |
| arCOG01540 | Yes | COG01007 | NuoN   |
| arCOG01543 | Yes | COG01143 | NuoI   |
| arCOG01545 | Yes | COG00650 | HyfC   |
| arCOG01546 | Yes | COG01005 | NuoH   |
| arCOG01547 | Yes | COG03261 | HycE   |
| arCOG01548 | Yes | COG00649 | NuoD   |
| arCOG01551 | Yes | COG00852 | NuoC   |
| arCOG01553 | Yes | COG03260 |        |
| arCOG01554 | Yes | COG00377 | NuoB   |
| arCOG01557 | Yes | COG00838 | NuoA   |
| arCOG01559 | Yes | COG00480 | FusA   |
| arCOG01560 | Yes | COG00532 | InfB   |
| arCOG01561 | Yes | COG05256 | TEF1   |
| arCOG01562 | Yes | COG05258 | GTPBP1 |
| arCOG01563 | Yes | COG05257 | GCD11  |
| arCOG01564 | Yes | COG03276 | SeIB   |
| arCOG01568 | Yes | COG00668 | MscS   |
| arCOG01572 | Yes |          |        |
| arCOG01573 | Yes | COG00668 | MscS   |

|            |     |          |      |
|------------|-----|----------|------|
| arCOG01574 | Yes | COG02123 |      |
| arCOG01575 | Yes | COG00689 | Rph  |
| arCOG01576 | Yes | COG02217 | ZntA |
| arCOG01578 | Yes | COG00474 | MgtA |
| arCOG01580 | Yes | COG01522 | Lrp  |
| arCOG01585 | no  | COG01522 | Lrp  |
| arCOG01586 | no  | COG01522 | Lrp  |
| arCOG01587 | no  | COG01522 | Lrp  |
| arCOG01588 | Yes |          | LysW |
| arCOG01589 | Yes | COG00189 | RimK |
| arCOG01590 | Yes | COG00439 | AccC |
| arCOG01594 | Yes | COG00458 | CarB |
| arCOG01597 | Yes | COG00026 | PurK |
| arCOG01598 | Yes | COG00027 | PurT |
| arCOG01599 | Yes | COG01013 | PorB |
| arCOG01601 | Yes | COG01013 | PorB |
| arCOG01602 | no  | COG01014 | PorG |
| arCOG01603 | Yes | COG01014 | PorG |
| arCOG01604 | no  | COG01144 |      |
| arCOG01605 | Yes | COG01144 |      |
| arCOG01606 | Yes | COG00674 | PorA |
| arCOG01608 | Yes | COG00674 | PorA |
| arCOG01609 | no  | COG04231 |      |
| arCOG01615 | Yes | COG02431 |      |
| arCOG01616 | Yes | COG01650 | GEK1 |
| arCOG01617 | Yes | COG00667 | Tas  |
| arCOG01618 | no  | COG00656 | ARA1 |
| arCOG01619 | Yes | COG00656 | ARA1 |
| arCOG01622 | no  | COG00673 | MviM |
| arCOG01628 | Yes | COG01522 | Lrp  |
| arCOG01630 | Yes | COG00251 | TdcF |
| arCOG01631 | Yes | COG00500 |      |
| arCOG01640 | Yes | COG01601 | GCD7 |
| arCOG01646 | Yes | COG01506 | DAP2 |
| arCOG01647 | no  | COG01505 |      |
| arCOG01648 | Yes | COG00596 | MhpC |
| arCOG01659 | no  | COG00412 |      |
| arCOG01663 | Yes | COG02026 | RelE |
| arCOG01665 | no  | COG02026 | RelE |
| arCOG01667 | Yes | COG03369 |      |
| arCOG01668 | no  | COG03370 |      |
| arCOG01669 | Yes | COG03370 |      |
| arCOG01670 | no  | COG02044 |      |
| arCOG01671 | Yes | COG00043 | UbiD |
| arCOG01672 | Yes | COG03889 |      |
| arCOG01673 | no  | COG00747 | DdpA |
| arCOG01674 | Yes | COG01254 | AcyP |
| arCOG01676 | Yes | COG00476 | ThiF |

|            |     |          |        |
|------------|-----|----------|--------|
| arCOG01678 | Yes | COG01812 | MetK   |
| arCOG01679 | Yes | COG00640 | ArsR   |
| arCOG01681 | no  | COG00640 | ArsR   |
| arCOG01695 | Yes | COG01293 |        |
| arCOG01696 | Yes | COG03635 |        |
| arCOG01697 | Yes | COG01048 | AcnA   |
| arCOG01698 | Yes | COG00065 | LeuC   |
| arCOG01699 | Yes | COG04353 |        |
| arCOG01700 | Yes | COG00010 | SpeB   |
| arCOG01701 | Yes | COG01676 | SEN2   |
| arCOG01702 | Yes | COG01676 | SEN2   |
| arCOG01703 | Yes | COG00163 | UbiX   |
| arCOG01704 | Yes | COG00452 | Dfp    |
| arCOG01706 | no  | COG00508 | AceF   |
| arCOG01707 | Yes | COG01960 | CaiA   |
| arCOG01710 | Yes | COG02185 | Sbm    |
| arCOG01711 | Yes | COG00221 | Ppa    |
| arCOG01713 | Yes | COG05440 |        |
| arCOG01714 | Yes | COG05440 |        |
| arCOG01715 | Yes | COG00719 | sufB   |
| arCOG01717 | Yes | COG00154 | GatA   |
| arCOG01718 | Yes | COG00064 | GatB   |
| arCOG01719 | Yes | COG02511 | GatE   |
| arCOG01720 | Yes | COG00723 | QcrA   |
| arCOG01721 | Yes | COG01290 | QcrB   |
| arCOG01722 | Yes | COG00099 | RpsM   |
| arCOG01723 | Yes | COG01437 | CyaB   |
| arCOG01726 | Yes | COG00142 | IspA   |
| arCOG01727 | Yes | COG00142 | IspA   |
| arCOG01728 | Yes | COG01355 |        |
| arCOG01730 | no  | COG03384 |        |
| arCOG01736 | Yes | COG01514 | LigT   |
| arCOG01739 | Yes | COG00681 | LepB   |
| arCOG01740 | no  | COG00681 | LepB   |
| arCOG01741 | Yes | COG01537 | PelA   |
| arCOG01742 | Yes | COG01503 | eRF1   |
| arCOG01747 | Yes | COG00015 | PurB   |
| arCOG01748 | Yes | COG00165 | ArgH   |
| arCOG01749 | Yes | COG00114 | FumC   |
| arCOG01751 | Yes | COG01358 | RPL8A  |
| arCOG01752 | Yes | COG01911 | RPL30  |
| arCOG01753 | Yes | COG01581 | Ssh10b |
| arCOG01754 | Yes | COG00111 | SerA   |
| arCOG01755 | Yes | COG01052 | LdhA   |
| arCOG01758 | Yes | COG00051 | RpsJ   |
| arCOG01759 | Yes | COG01259 |        |
| arCOG01760 | Yes | COG00195 | NusA   |
| arCOG01761 | Yes | COG00195 | NusA   |

|            |     |          |           |
|------------|-----|----------|-----------|
| arCOG01762 | Yes | COG00085 | RpoB/Rpo2 |
| arCOG01764 | Yes | COG02101 | SPT15     |
| arCOG01767 | Yes | COG03425 | PksG      |
| arCOG01768 | Yes | COG00705 | GlpG      |
| arCOG01773 | Yes | COG00500 |           |
| arCOG01776 | Yes | COG00500 |           |
| arCOG01786 | no  | COG00500 |           |
| arCOG01790 | no  | COG00500 |           |
| arCOG01791 | Yes | COG00500 |           |
| arCOG01804 | no  | COG03888 |           |
| arCOG01808 | Yes | COG02064 | TadC      |
| arCOG01809 | no  | COG01955 | FlaJ      |
| arCOG01815 | Yes | COG02064 | TadC      |
| arCOG01817 | Yes | COG00630 | VirB11    |
| arCOG01822 | no  | COG03354 | FlaG      |
| arCOG01824 | no  | COG03353 | FlaF      |
| arCOG01829 | no  | COG01681 | FlaB      |
| arCOG01830 | Yes | COG01665 |           |
| arCOG01831 | Yes | COG01665 |           |
| arCOG01832 | Yes | COG00071 | IbpA      |
| arCOG01833 | Yes | COG00071 | IbpA      |
| arCOG01840 | Yes | COG00071 | IbpA      |
| arCOG01842 | no  | COG03255 |           |
| arCOG01845 | Yes | COG02151 | PaaD      |
| arCOG01849 | Yes | COG00663 | PaaY      |
| arCOG01852 | no  | COG02151 | PaaD      |
| arCOG01857 | Yes | COG01303 |           |
| arCOG01863 | Yes | COG01813 |           |
| arCOG01868 | Yes | COG00735 | Fur       |
| arCOG01870 | no  | COG01865 | cbiZ      |
| arCOG01871 | Yes | COG02266 |           |
| arCOG01872 | Yes | COG00746 | MobA      |
| arCOG01873 | Yes | COG02068 | MobA      |
| arCOG01875 | Yes | COG01475 |           |
| arCOG01876 | Yes | COG00620 | MetE      |
| arCOG01877 | Yes | COG00620 | MetE      |
| arCOG01879 | Yes | COG00170 |           |
| arCOG01883 | Yes | COG01351 | THY1      |
| arCOG01885 | Yes | COG01383 | RPS17A    |
| arCOG01886 | Yes | COG00162 | TyrS      |
| arCOG01887 | Yes | COG00180 | TrpS      |
| arCOG01891 | Yes | COG00125 | Tmk       |
| arCOG01894 | Yes | COG00648 | Nfo       |
| arCOG01896 | no  | COG01082 | IolE      |
| arCOG01902 | no  | COG01082 | IolE      |
| arCOG01904 | Yes | COG01339 |           |
| arCOG01905 | no  | COG04189 |           |
| arCOG01907 | Yes | COG02013 |           |

|            |     |          |        |
|------------|-----|----------|--------|
| arCOG01909 | Yes | COG00174 | GlnA   |
| arCOG01910 | no  | COG01030 | NfeD   |
| arCOG01912 | no  | COG01585 |        |
| arCOG01915 | no  | COG00330 | HflC   |
| arCOG01917 | no  |          |        |
| arCOG01918 | Yes | COG00330 | HflC   |
| arCOG01919 | Yes | COG00805 | TatC   |
| arCOG01920 | Yes | COG00250 | NusG   |
| arCOG01921 | Yes | COG02083 |        |
| arCOG01923 | Yes | COG01498 | SIK1   |
| arCOG01924 | Yes | COG00252 | AnsB   |
| arCOG01925 | Yes | COG02080 | CoxS   |
| arCOG01926 | Yes | COG01319 | CoxM   |
| arCOG01927 | Yes | COG03427 | CoxG   |
| arCOG01928 | Yes | COG03427 |        |
| arCOG01929 | Yes | COG01975 | XdhC   |
| arCOG01930 | no  | COG02159 |        |
| arCOG01931 | no  | COG02159 |        |
| arCOG01932 | no  | COG02159 |        |
| arCOG01933 | no  | COG02159 |        |
| arCOG01934 | no  | COG02159 |        |
| arCOG01935 | no  | COG04006 |        |
| arCOG01937 | no  | COG01750 |        |
| arCOG01939 | Yes | COG00095 | LplA   |
| arCOG01940 | Yes | COG00340 | BirA   |
| arCOG01943 | Yes | COG01335 | PncA   |
| arCOG01946 | Yes | COG02125 | RPS6A  |
| arCOG01947 | Yes | COG01280 | RhtB   |
| arCOG01950 | Yes | COG02075 | RPL24A |
| arCOG01951 | Yes | COG01444 |        |
| arCOG01952 | Yes | COG00009 | SUA5   |
| arCOG01953 | Yes | COG00475 | KefB   |
| arCOG01956 | no  | COG00475 | KefB   |
| arCOG01958 | no  | COG01226 | Kch    |
| arCOG01969 | no  | COG00475 | KefB   |
| arCOG01972 | Yes | COG00526 | TrxA   |
| arCOG01978 | Yes | COG00294 | FolP   |
| arCOG01981 | Yes | COG01405 | SUA7   |
| arCOG01982 | no  | COG00434 | SgcQ   |
| arCOG01983 | Yes | COG00135 | TrpF   |
| arCOG01984 | no  | COG02440 | FixX   |
| arCOG01985 | no  | COG02440 | FixX   |
| arCOG01987 | no  | COG01788 | AtoD   |
| arCOG01988 | Yes | COG02092 | EFB1   |
| arCOG01989 | Yes | COG02888 |        |
| arCOG01991 | Yes | COG00406 | phoE   |
| arCOG01992 | Yes | COG02062 | SixA   |
| arCOG01995 | Yes | COG02867 |        |



|            |     |          |      |
|------------|-----|----------|------|
| arCOG01997 | Yes | COG02095 | MarC |
| arCOG01998 | Yes | COG00028 | IlvB |
| arCOG01999 | no  | COG00028 |      |
| arCOG02001 | no  | COG00028 | IlvB |
| arCOG02004 | no  | COG03473 |      |
| arCOG02007 | Yes | COG01331 |      |
| arCOG02008 | no  | COG03371 |      |
| arCOG02012 | Yes | COG00547 | TrpD |
| arCOG02014 | Yes | COG00147 | TrpE |
| arCOG02017 | no  | COG01853 |      |
| arCOG02019 | no  | COG02897 | SseA |
| arCOG02021 | Yes | COG00607 | PspE |
| arCOG02026 | no  | COG05557 |      |
| arCOG02027 | Yes | COG03301 | NrfD |
| arCOG02037 | Yes | COG01378 |      |
| arCOG02044 | Yes | COG01287 |      |
| arCOG02048 | Yes | COG01587 | HemD |
| arCOG02050 | Yes | COG00730 |      |
| arCOG02053 | Yes | COG00589 | UspA |
| arCOG02055 | no  | COG00155 | Cysl |
| arCOG02062 | Yes | COG00425 | SirA |
| arCOG02064 | Yes | COG02210 |      |
| arCOG02065 | no  | COG02210 |      |
| arCOG02066 | Yes | COG02044 |      |
| arCOG02067 | Yes | COG02044 |      |
| arCOG02072 | Yes | COG00425 | SirA |
| arCOG02074 | no  | COG00425 | SirA |
| arCOG02076 | no  | COG02044 |      |
| arCOG02089 | Yes | COG01361 |      |
| arCOG02092 | Yes | COG00119 | LeuA |
| arCOG02097 | Yes | COG00710 | AroD |
| arCOG02098 | Yes | COG01605 | PheA |
| arCOG02099 | Yes | COG01321 | TroR |
| arCOG02100 | Yes | COG01321 | TroR |
| arCOG02103 | Yes |          |      |
| arCOG02108 | no  | COG02445 |      |
| arCOG02110 | no  | COG01708 |      |
| arCOG02113 | no  | COG02427 |      |
| arCOG02114 | Yes | COG02427 |      |
| arCOG02115 | Yes | COG02427 |      |
| arCOG02127 | no  | COG03335 |      |
| arCOG02129 | no  | COG03335 |      |
| arCOG02130 | no  | COG03335 |      |
| arCOG02133 | no  | COG01662 | InsB |
| arCOG02134 | Yes | COG03316 |      |
| arCOG02143 | Yes | COG02368 |      |
| arCOG02149 | no  | COG00599 |      |
| arCOG02159 | Yes | COG04089 |      |

|            |     |          |          |
|------------|-----|----------|----------|
| arCOG02165 | no  | COG01305 |          |
| arCOG02172 | Yes | COG00720 |          |
| arCOG02173 | Yes | COG00602 | NrdG     |
| arCOG02175 | Yes | COG02409 |          |
| arCOG02187 | Yes | COG01145 | NapF     |
| arCOG02199 | Yes | COG00543 | UbiB     |
| arCOG02204 | Yes | COG02443 | Sss1     |
| arCOG02207 | Yes | COG00708 | XthA     |
| arCOG02208 | Yes | COG00040 | HisG     |
| arCOG02209 | no  | COG02244 | RfbX     |
| arCOG02217 | no  | SC.00003 |          |
| arCOG02218 | Yes | SC.00003 |          |
| arCOG02219 | Yes | COG01487 | VapC     |
| arCOG02221 | Yes | COG01848 |          |
| arCOG02222 | no  | COG01848 |          |
| arCOG02227 | no  | COG01487 | VapC     |
| arCOG02228 | Yes | COG02246 |          |
| arCOG02230 | Yes | COG00066 | LeuD     |
| arCOG02231 | Yes | COG02509 |          |
| arCOG02234 | Yes | COG01148 | HdrA     |
| arCOG02235 | no  | COG01148 | HdrA     |
| arCOG02236 | no  | COG01148 | HdrA     |
| arCOG02242 | Yes | COG03355 |          |
| arCOG02244 | no  | COG02009 | SdhC     |
| arCOG02246 | Yes | COG02138 |          |
| arCOG02247 | Yes | COG02082 | CobH     |
| arCOG02250 | no  | COG00619 | CbiQ     |
| arCOG02266 | Yes | COG00598 | CorA     |
| arCOG02267 | Yes | COG00306 | PitA     |
| arCOG02271 | Yes | COG03413 |          |
| arCOG02272 | no  | COG03413 |          |
| arCOG02273 | no  | COG03413 |          |
| arCOG02287 | no  | COG00393 |          |
| arCOG02291 | Yes | COG01011 |          |
| arCOG02293 | Yes | COG00637 |          |
| arCOG02298 | Yes | COG01989 | PulO     |
| arCOG02304 | no  | COG01804 | Mct/CaiB |
| arCOG02312 | Yes | COG00577 | SalY     |
| arCOG02431 | no  | COG01611 |          |
| arCOG02441 | Yes | COG01277 | NosY     |
| arCOG02455 | Yes | COG00636 | AtpK     |
| arCOG02459 | Yes | COG01527 | NtpC     |
| arCOG02462 | no  | COG01878 |          |
| arCOG02464 | Yes | COG00041 | PurE     |
| arCOG02466 | Yes | COG03277 | GAR1     |
| arCOG02527 | no  | COG03291 |          |
| arCOG02556 | no  | COG01520 |          |
| arCOG02560 | no  | COG03391 |          |

|            |     |          |           |
|------------|-----|----------|-----------|
| arCOG02562 | no  | COG03391 |           |
| arCOG02569 | no  | COG00038 | EriC      |
| arCOG02586 | no  | COG00727 |           |
| arCOG02617 | no  |          |           |
| arCOG02620 | no  | COG01541 | PaaK      |
| arCOG02623 | Yes | COG01541 | PaaK      |
| arCOG02638 | no  | COG00657 | Aes       |
| arCOG02640 | Yes | COG01392 |           |
| arCOG02647 | no  | COG01309 | AcrR      |
| arCOG02654 | no  | COG03337 |           |
| arCOG02656 | no  | COG03337 |           |
| arCOG02657 | Yes | COG01336 | Cas7/Cmr4 |
| arCOG02658 | no  | COG01337 | Cas7/Csm3 |
| arCOG02659 | no  | COG01337 | Cas7/Csm3 |
| arCOG02660 | no  | COG01337 | Cas7/Csm3 |
| arCOG02661 | no  | COG01604 | Cas7/Cmr6 |
| arCOG02665 | no  | COG01769 | Cas5/Cmr3 |
| arCOG02666 | no  | COG01353 | Cas10     |
| arCOG02670 | no  | COG01688 | Cas5      |
| arCOG02676 | Yes | COG00139 | Hisl      |
| arCOG02677 | Yes | COG00140 | Hisl      |
| arCOG02681 | Yes | COG01753 |           |
| arCOG02682 | Yes | COG00477 | ProP      |
| arCOG02683 | Yes | COG00477 | ProP      |
| arCOG02684 | no  | COG00477 | ProP      |
| arCOG02685 | no  | COG00477 | ProP      |
| arCOG02687 | Yes | COG00477 | ProP      |
| arCOG02688 | no  | COG00477 | ProP      |
| arCOG02689 | Yes | COG00477 | ProP      |
| arCOG02690 | no  | COG00477 | ProP      |
| arCOG02691 | Yes | COG00477 | ProP      |
| arCOG02692 | no  | COG00477 | ProP      |
| arCOG02693 | no  | COG00477 | ProP      |
| arCOG02694 | Yes | COG01826 | TatA      |
| arCOG02699 | Yes | COG00511 | AccB      |
| arCOG02700 | no  | COG00508 | AceF      |
| arCOG02702 | Yes | COG00500 |           |
| arCOG02703 | no  | COG00500 |           |
| arCOG02705 | Yes | COG04799 |           |
| arCOG02706 | Yes | COG00346 | GloA      |
| arCOG02718 | Yes | COG02034 |           |
| arCOG02719 | no  | COG02034 |           |
| arCOG02724 | Yes | COG00350 | Ada       |
| arCOG02726 | Yes | COG00721 | GatC      |
| arCOG02727 | Yes | COG01673 |           |
| arCOG02730 | Yes | COG01848 |           |
| arCOG02731 | no  | COG01487 | VapC      |
| arCOG02734 | Yes | COG01433 |           |

|            |     |          |        |
|------------|-----|----------|--------|
| arCOG02738 | Yes | COG01433 |        |
| arCOG02739 | no  | COG01433 |        |
| arCOG02741 | Yes | COG00422 | ThiC   |
| arCOG02754 | no  | COG03039 |        |
| arCOG02759 | no  | COG01943 |        |
| arCOG02761 | no  | COG03439 |        |
| arCOG02763 | Yes | COG02217 |        |
| arCOG02764 | no  | COG02608 | CopZ   |
| arCOG02772 | no  | COG00348 | NapH   |
| arCOG02792 | no  | COG00477 | ProP   |
| arCOG02794 | no  | COG00477 | ProP   |
| arCOG02816 | no  | COG00225 | MsrA   |
| arCOG02833 | no  | COG00265 | DegQ   |
| arCOG02835 | no  | COG02324 |        |
| arCOG02840 | no  | COG00415 | PhrB   |
| arCOG02841 | no  | COG01132 | MdlB   |
| arCOG02852 | Yes | COG02146 | {NirD} |
| arCOG02853 | Yes | COG02146 | {NirD} |
| arCOG02854 | no  | COG02146 | {NirD} |
| arCOG02855 | no  | COG02146 | {NirD} |
| arCOG02860 | Yes | COG00288 | CynT   |
| arCOG02862 | Yes | COG02259 |        |
| arCOG02863 | no  | COG02259 |        |
| arCOG02869 | Yes | COG02761 | FrnE   |
| arCOG02881 | Yes | COG00530 | ECM27  |
| arCOG02884 | no  | COG04743 |        |
| arCOG02887 | no  | COG04743 |        |
| arCOG02900 | Yes | COG02304 |        |
| arCOG02935 | no  | COG01741 |        |
| arCOG02936 | no  | COG01562 | ERG9   |
| arCOG02937 | Yes | COG03407 | MVD1   |
| arCOG02939 | no  | COG02154 |        |
| arCOG02942 | no  | COG00328 | RnhA   |
| arCOG02949 | no  | COG01523 | PulA   |
| arCOG02951 | no  | COG00296 | GlgB   |
| arCOG02955 | no  | COG03280 | TreY   |
| arCOG02957 | Yes | COG04023 | SBH1   |
| arCOG02960 | Yes | COG04882 |        |
| arCOG02969 | Yes | COG00308 | PepN   |
| arCOG02979 | Yes |          |        |
| arCOG02994 | Yes | COG01917 |        |
| arCOG03000 | Yes | COG03435 |        |
| arCOG03002 | no  | COG01917 |        |
| arCOG03013 | Yes | COG02219 | PRI2   |
| arCOG03016 | Yes | COG00451 | WcaG   |
| arCOG03031 | no  | COG03253 | ywfl   |
| arCOG03032 | no  | COG00457 | NrfG   |
| arCOG03038 | Yes | COG00457 | NrfG   |

|            |     |          |       |
|------------|-----|----------|-------|
| arCOG03042 | Yes | COG00457 | NrfG  |
| arCOG03056 | no  | COG00671 | PgpB  |
| arCOG03073 | Yes | COG00713 | NuoK  |
| arCOG03108 | no  | COG02235 | ArcA  |
| arCOG03117 | Yes | COG00586 | DedA  |
| arCOG03119 | Yes |          |       |
| arCOG03142 | Yes |          |       |
| arCOG03162 | no  | COG01961 | PinR  |
| arCOG03164 | Yes | COG02452 |       |
| arCOG03166 | no  | COG01672 |       |
| arCOG03167 | Yes | COG01373 |       |
| arCOG03168 | no  | COG01373 |       |
| arCOG03169 | Yes | COG01672 |       |
| arCOG03176 | no  | COG01584 |       |
| arCOG03181 | no  | COG01846 | MarR  |
| arCOG03182 | Yes | COG01846 | MarR  |
| arCOG03199 | Yes | COG00472 | Rfe   |
| arCOG03202 | Yes | COG00826 |       |
| arCOG03216 | Yes | COG02014 |       |
| arCOG03229 | Yes | COG02454 |       |
| arCOG03233 | Yes | COG04938 |       |
| arCOG03237 | no  | COG01106 |       |
| arCOG03239 | Yes | COG01106 |       |
| arCOG03240 | no  | COG01195 | RecF  |
| arCOG03247 | Yes | COG02136 | IMP4  |
| arCOG03271 | Yes | COG02105 |       |
| arCOG03278 | Yes | COG01449 |       |
| arCOG03284 | no  | COG01449 |       |
| arCOG03285 | Yes | COG03387 | SGA1  |
| arCOG03286 | no  | COG03387 | SGA1  |
| arCOG03287 | Yes | COG03408 | GDB1  |
| arCOG03358 | no  | COG03355 |       |
| arCOG03384 | no  | COG04946 |       |
| arCOG03413 | Yes | COG02453 | CDC14 |
| arCOG03423 | no  | COG01846 | MarR  |
| arCOG03428 | Yes | COG00457 | NrfG  |
| arCOG03431 | no  | COG04279 |       |
| arCOG03433 | no  | COG01517 |       |
| arCOG03436 | Yes | COG01517 |       |
| arCOG03437 | no  | COG01517 |       |
| arCOG03447 | no  | COG01457 | CodB  |
| arCOG03448 | no  | COG01953 | FUI1  |
| arCOG03460 | no  | COG02120 |       |
| arCOG03462 | no  | COG00531 | PotE  |
| arCOG03463 | no  | COG00531 | PotE  |
| arCOG03464 | no  | COG00531 | PotE  |
| arCOG03465 | Yes | COG00531 | PotE  |
| arCOG03466 | no  | COG00531 | PotE  |

|            |     |          |           |
|------------|-----|----------|-----------|
| arCOG03482 | Yes |          | Cas7/Csc2 |
| arCOG03483 | Yes | COG01203 | Cas3d     |
| arCOG03560 | no  |          |           |
| arCOG03580 | no  | COG02020 | STE14     |
| arCOG03586 | no  | COG03547 |           |
| arCOG03587 | no  | COG03547 |           |
| arCOG03617 | no  | COG01857 | Cas7      |
| arCOG03626 | Yes | COG04237 | HyfE      |
| arCOG03639 | Yes | COG00121 |           |
| arCOG03649 | no  | COG00531 | PotE      |
| arCOG03650 | no  | COG00531 | PotE      |
| arCOG03651 | no  | COG00531 | PotE      |
| arCOG03652 | Yes | COG00531 | PotE      |
| arCOG03654 | Yes | COG00531 | PotE      |
| arCOG03656 | no  | COG00028 |           |
| arCOG03657 | Yes | COG00028 |           |
| arCOG03658 | Yes | COG00208 | NrdF      |
| arCOG03659 | Yes | COG02971 |           |
| arCOG03660 | Yes | COG00477 | ProP      |
| arCOG03661 | no  | COG00383 | AMS1      |
| arCOG03663 | no  | COG01501 |           |
| arCOG03665 | Yes | COG04934 |           |
| arCOG03669 | no  | COG04934 |           |
| arCOG03670 | Yes | SC.00065 |           |
| arCOG03671 | Yes |          |           |
| arCOG03672 | Yes | SC.00065 |           |
| arCOG03673 | no  |          |           |
| arCOG03674 | Yes | SC.00065 |           |
| arCOG03682 | Yes | COG00515 | SPS1      |
| arCOG03686 | Yes | COG01765 |           |
| arCOG03692 | Yes | SC.00068 |           |
| arCOG03693 | no  | SC.00068 |           |
| arCOG03694 | Yes |          |           |
| arCOG03696 | Yes | COG00348 | NapH      |
| arCOG03698 | Yes | COG04344 |           |
| arCOG03699 | Yes |          |           |
| arCOG03700 | no  |          | SoxE      |
| arCOG03701 | no  | COG05650 |           |
| arCOG03703 | no  | COG05650 |           |
| arCOG03704 | no  |          |           |
| arCOG03705 | Yes | COG01547 |           |
| arCOG03706 | no  | COG01848 |           |
| arCOG03707 | no  | SC.00069 |           |
| arCOG03708 | Yes | SC.00069 |           |
| arCOG03712 | Yes | SC.00069 |           |
| arCOG03713 | Yes | COG00209 | NrdA      |
| arCOG03714 | no  | COG01328 | NrdD      |
| arCOG03721 | Yes | SC.00071 |           |

|            |     |          |      |
|------------|-----|----------|------|
| arCOG03722 | no  | SC.00071 |      |
| arCOG03724 | no  |          |      |
| arCOG03737 | Yes |          |      |
| arCOG03738 | Yes |          |      |
| arCOG03743 | no  | COG05550 |      |
| arCOG03748 | no  | COG01846 | MarR |
| arCOG03749 | no  | COG04243 |      |
| arCOG03765 | Yes | SC.00090 |      |
| arCOG03768 | Yes |          |      |
| arCOG03769 | no  |          |      |
| arCOG03770 | Yes |          |      |
| arCOG03772 | Yes | COG04345 |      |
| arCOG03778 | Yes |          |      |
| arCOG03779 | Yes | COG01401 | McrB |
| arCOG03823 | no  | SC.00102 |      |
| arCOG03824 | no  |          |      |
| arCOG03837 | Yes | COG00095 |      |
| arCOG03838 | Yes |          | PqqD |
| arCOG03840 | no  | COG03535 |      |
| arCOG03841 | no  | COG03535 |      |
| arCOG03842 | no  | COG00526 |      |
| arCOG03843 | no  | SC.00105 |      |
| arCOG03844 | Yes | SC.00105 |      |
| arCOG03845 | Yes | COG03609 |      |
| arCOG03846 | Yes | COG03609 |      |
| arCOG03847 | no  | COG01517 |      |
| arCOG03849 | Yes |          |      |
| arCOG03850 | no  | COG04122 |      |
| arCOG03851 | Yes |          |      |
| arCOG03852 | Yes |          |      |
| arCOG03853 | Yes |          |      |
| arCOG03854 | Yes |          |      |
| arCOG03855 | Yes |          |      |
| arCOG03856 | no  | SC.00106 |      |
| arCOG03857 | no  | SC.00106 |      |
| arCOG03858 | no  |          |      |
| arCOG03859 | no  | COG00640 | ArsR |
| arCOG03861 | Yes |          |      |
| arCOG03862 | no  |          |      |
| arCOG03863 | no  | COG04354 |      |
| arCOG03864 | no  | COG04354 |      |
| arCOG03865 | no  | COG04354 |      |
| arCOG03867 | no  | COG04354 |      |
| arCOG03868 | no  | SC.00107 |      |
| arCOG03869 | Yes | SC.00107 |      |
| arCOG03871 | Yes | SC.00076 |      |
| arCOG03872 | no  |          |      |
| arCOG03879 | Yes | COG03682 |      |

|            |     |          |           |
|------------|-----|----------|-----------|
| arCOG03882 | Yes | COG02003 |           |
| arCOG03891 | no  | COG01367 | Cas7/Cmr1 |
| arCOG03893 | no  | COG01367 | Cas7/Cmr1 |
| arCOG03902 | no  | COG03385 |           |
| arCOG04004 | no  | COG00666 | Arp       |
| arCOG04017 | no  |          |           |
| arCOG04025 | no  |          |           |
| arCOG04027 | no  | COG01725 |           |
| arCOG04028 | no  | COG05550 |           |
| arCOG04029 | no  | COG05550 |           |
| arCOG04030 | no  | SC.00125 |           |
| arCOG04031 | no  | SC.00125 |           |
| arCOG04032 | no  |          |           |
| arCOG04033 | no  |          |           |
| arCOG04035 | no  | COG03451 | VirB4     |
| arCOG04039 | no  |          |           |
| arCOG04044 | Yes | COG01830 |           |
| arCOG04045 | Yes | COG00129 | IlvD      |
| arCOG04046 | Yes | COG04996 |           |
| arCOG04048 | Yes | COG00717 | Dcd       |
| arCOG04049 | Yes | COG01552 | RPL40A    |
| arCOG04050 | Yes | COG00258 | Exo       |
| arCOG04051 | Yes | COG02412 |           |
| arCOG04053 | Yes | COG00405 | Ggt       |
| arCOG04054 | Yes |          |           |
| arCOG04055 | Yes | COG01371 |           |
| arCOG04056 | no  | COG00640 | ArsR      |
| arCOG04059 | Yes |          |           |
| arCOG04060 | Yes | COG01709 |           |
| arCOG04061 | Yes | COG01308 | EGD2      |
| arCOG04062 | Yes |          |           |
| arCOG04064 | Yes | COG00750 |           |
| arCOG04066 | Yes | COG02413 |           |
| arCOG04067 | Yes | COG00090 | RplB      |
| arCOG04068 | Yes |          |           |
| arCOG04069 | Yes | COG02106 |           |
| arCOG04070 | Yes | COG00087 | RplC      |
| arCOG04071 | Yes | COG00088 | RplD      |
| arCOG04072 | Yes | COG00089 | RplW      |
| arCOG04075 | Yes | COG00214 | SNZ1      |
| arCOG04076 | Yes | COG01909 |           |
| arCOG04077 | Yes | COG02093 | Spt4      |
| arCOG04081 | Yes | COG01224 | TIP49     |
| arCOG04082 | no  | COG02366 |           |
| arCOG04083 | no  | COG02355 |           |
| arCOG04086 | Yes | COG01841 | RpmD      |
| arCOG04087 | Yes | COG00098 | RpsE      |
| arCOG04088 | Yes | COG00256 | RplR      |



|            |     |          |        |
|------------|-----|----------|--------|
| arCOG04089 | Yes | COG02147 | RPL19A |
| arCOG04090 | Yes | COG00097 | RplF   |
| arCOG04091 | Yes | COG00096 | RpsH   |
| arCOG04092 | Yes | COG00094 | RplE   |
| arCOG04093 | Yes | COG01471 | RPS4A  |
| arCOG04094 | Yes | COG00198 | RplX   |
| arCOG04095 | Yes | COG00093 | RplN   |
| arCOG04096 | Yes | COG00186 | RpsQ   |
| arCOG04097 | Yes | COG00092 | RpsC   |
| arCOG04098 | Yes | COG00091 | RplV   |
| arCOG04099 | Yes | COG00185 | RpsS   |
| arCOG04100 | no  | COG01960 | CaiA   |
| arCOG04101 | Yes | COG01394 | NtpD   |
| arCOG04102 | Yes | COG01436 | NtpG   |
| arCOG04103 | Yes |          |        |
| arCOG04104 | Yes |          |        |
| arCOG04105 | Yes |          |        |
| arCOG04106 | Yes | COG00575 | CdsA   |
| arCOG04107 | Yes | COG01093 | SUI2   |
| arCOG04108 | Yes | COG02051 | RPS27A |
| arCOG04109 | Yes | COG01631 | RPL42A |
| arCOG04110 | Yes | COG01467 | PRI1   |
| arCOG04111 | Yes | COG01761 | RPB11  |
| arCOG04112 | Yes | COG01736 | DPH2   |
| arCOG04113 | Yes | COG00197 | RplP   |
| arCOG04114 | Yes |          |        |
| arCOG04115 | Yes | COG01489 | SfsA   |
| arCOG04116 | Yes | COG01855 |        |
| arCOG04119 | Yes | COG04914 |        |
| arCOG04120 | no  | COG00469 | PykF   |
| arCOG04121 | Yes | COG00164 | RnhB   |
| arCOG04122 | Yes | COG01756 | Mra1   |
| arCOG04123 | Yes | COG04755 |        |
| arCOG04124 | Yes | COG02835 |        |
| arCOG04125 | Yes | COG00430 | RCL1   |
| arCOG04126 | Yes | COG02126 | RPL37A |
| arCOG04127 | Yes | COG01341 |        |
| arCOG04128 | no  | COG00035 | Upp    |
| arCOG04129 | Yes | COG02139 | RPL21A |
| arCOG04130 | Yes | COG01491 |        |
| arCOG04131 | Yes | COG00030 | KsgA   |
| arCOG04132 | no  | COG04697 |        |
| arCOG04133 | Yes | COG00082 | AroC   |
| arCOG04134 | Yes | COG00128 | AroA   |
| arCOG04135 | Yes |          |        |
| arCOG04136 | Yes | COG04888 |        |
| arCOG04137 | Yes | COG00499 | SAM1   |
| arCOG04138 | Yes | COG01269 | Ntpl   |

|            |     |          |        |
|------------|-----|----------|--------|
| arCOG04140 | Yes | COG01888 |        |
| arCOG04142 | Yes | COG01899 | DYS1   |
| arCOG04143 | Yes | COG01697 |        |
| arCOG04147 | Yes | COG00605 | SodA   |
| arCOG04148 | no  | COG02874 | FlaH   |
| arCOG04149 | Yes | COG01499 | NMD3   |
| arCOG04150 | Yes | COG01094 |        |
| arCOG04151 | Yes | COG02237 |        |
| arCOG04152 | Yes | COG01395 |        |
| arCOG04153 | Yes | COG01522 |        |
| arCOG04154 | Yes | COG02007 | RPS8A  |
| arCOG04156 | Yes | COG01590 | TYW3   |
| arCOG04157 | Yes | COG00270 | Dcm    |
| arCOG04160 | Yes |          |        |
| arCOG04161 | Yes | COG01798 | DPH5   |
| arCOG04164 | Yes | COG04034 |        |
| arCOG04165 | Yes |          |        |
| arCOG04166 | Yes | COG04879 |        |
| arCOG04167 | Yes | COG02163 | RPL14A |
| arCOG04168 | no  | COG02174 | RPL34A |
| arCOG04169 | Yes | COG00201 | SecY   |
| arCOG04170 | Yes | COG02379 | GckA   |
| arCOG04171 | Yes | COG02090 |        |
| arCOG04172 | Yes | COG00329 | DapA   |
| arCOG04173 | no  | COG00295 | Cdd    |
| arCOG04174 | Yes | COG00731 | TYW3   |
| arCOG04175 | Yes | COG02157 | RPL20A |
| arCOG04176 | Yes | COG01976 | TIF6   |
| arCOG04177 | Yes | COG02167 | RPL39  |
| arCOG04179 | Yes | COG02118 |        |
| arCOG04180 | Yes | COG01980 |        |
| arCOG04181 | Yes | COG04046 |        |
| arCOG04182 | Yes | COG02004 | RPS24A |
| arCOG04183 | Yes | COG01998 | RPS31  |
| arCOG04184 | Yes | COG00127 |        |
| arCOG04185 | Yes | COG00184 | RpsO   |
| arCOG04186 | Yes | COG01890 | RPS1A  |
| arCOG04187 | Yes | COG01500 |        |
| arCOG04188 | Yes | COG01898 | RfbC   |
| arCOG04191 | no  | COG02046 | MET3   |
| arCOG04194 | no  | COG01343 | Cas2   |
| arCOG04195 | no  | COG04343 |        |
| arCOG04197 | no  |          |        |
| arCOG04201 | no  | COG00365 | AcS    |
| arCOG04202 | Yes | COG02429 |        |
| arCOG04204 | no  | COG03342 |        |
| arCOG04206 | Yes | COG01948 | MUS81  |
| arCOG04208 | Yes | COG01997 | RPL43A |

|            |     |          |            |
|------------|-----|----------|------------|
| arCOG04209 | Yes | COG01632 | RPL15A     |
| arCOG04213 | Yes | COG01260 | INO1       |
| arCOG04214 | Yes | COG00432 |            |
| arCOG04216 | no  |          |            |
| arCOG04217 | Yes | COG04900 |            |
| arCOG04219 | Yes | COG02433 |            |
| arCOG04221 | Yes | COG00647 | NagD       |
| arCOG04223 | Yes | COG00023 | SUI1       |
| arCOG04224 | Yes |          |            |
| arCOG04225 | no  | COG02110 |            |
| arCOG04227 | Yes | COG01832 |            |
| arCOG04228 | Yes | COG01990 | pth2       |
| arCOG04229 | Yes | COG01781 | Pyrl       |
| arCOG04231 | Yes | COG01324 | CutA       |
| arCOG04232 | Yes | COG01884 | Sbm        |
| arCOG04233 | Yes | COG00614 | FepB       |
| arCOG04234 | Yes |          |            |
| arCOG04235 | Yes | COG05494 |            |
| arCOG04236 | no  | COG00396 | sufC       |
| arCOG04237 | Yes | COG00372 | GltA       |
| arCOG04238 | Yes | COG01767 | CitG       |
| arCOG04239 | Yes | COG00522 | RpsD       |
| arCOG04240 | Yes | COG00100 | RpsK       |
| arCOG04241 | Yes | COG00202 | RpoA/Rpo1  |
| arCOG04242 | Yes | COG00102 | RplM       |
| arCOG04243 | Yes | COG00103 | RpsI       |
| arCOG04244 | Yes | COG01644 | RPB10      |
| arCOG04245 | Yes | COG00052 | RpsB       |
| arCOG04246 | Yes | COG01690 | RtcB       |
| arCOG04247 | Yes | COG02317 |            |
| arCOG04248 | no  | COG00846 | SIR2       |
| arCOG04249 | Yes | COG01746 | CCA1       |
| arCOG04250 | Yes | COG03382 |            |
| arCOG04251 | Yes | COG05399 |            |
| arCOG04252 | Yes | COG00585 |            |
| arCOG04253 | Yes | COG01415 |            |
| arCOG04254 | Yes | COG00049 | RpsG       |
| arCOG04255 | Yes | COG00048 | RpsL       |
| arCOG04256 | Yes | COG00086 | RpoC/Rpo11 |
| arCOG04257 | Yes | COG00086 | RpoC/Rpo3  |
| arCOG04258 | Yes | COG02012 | RPB5       |
| arCOG04260 | Yes | COG01257 | HMG1       |
| arCOG04261 | Yes |          |            |
| arCOG04262 | Yes | COG01701 |            |
| arCOG04263 | Yes | COG01829 |            |
| arCOG04265 | Yes | COG01779 |            |
| arCOG04266 | Yes |          |            |
| arCOG04268 | Yes |          | Cdt1       |

|            |     |          |        |
|------------|-----|----------|--------|
| arCOG04269 | Yes | COG01602 |        |
| arCOG04270 | Yes | COG01675 | TFA1   |
| arCOG04271 | Yes |          | RPB8   |
| arCOG04272 | Yes | COG02038 | CobT   |
| arCOG04273 | Yes | COG00079 | HisC   |
| arCOG04274 | Yes | COG01270 | CbiB   |
| arCOG04276 | Yes | COG00209 | NrdA   |
| arCOG04277 | Yes | COG00231 | Efp    |
| arCOG04281 | Yes | COG00358 | DnaG   |
| arCOG04283 | Yes |          |        |
| arCOG04285 | no  | COG02079 | PrpD   |
| arCOG04287 | Yes | COG02058 | RPP1A  |
| arCOG04288 | Yes | COG00244 | RplJ   |
| arCOG04289 | Yes | COG00081 | RplA   |
| arCOG04290 | Yes | COG01656 |        |
| arCOG04291 | Yes | COG01801 |        |
| arCOG04293 | Yes | COG04919 |        |
| arCOG04294 | Yes | COG00468 | RecA   |
| arCOG04298 | Yes | COG01839 |        |
| arCOG04299 | Yes | COG00181 | HemC   |
| arCOG04300 | Yes | COG00113 | HemB   |
| arCOG04302 | Yes | COG00008 | GlnS   |
| arCOG04303 | Yes | COG01634 |        |
| arCOG04305 | Yes | COG04830 | RPS26B |
| arCOG04307 | Yes | COG01530 | CafA   |
| arCOG04308 | Yes | COG01698 |        |
| arCOG04309 | Yes | COG01912 |        |
| arCOG04310 | no  | COG01960 | CaiA   |
| arCOG04311 | Yes | COG01896 |        |
| arCOG04312 | Yes | COG01412 |        |
| arCOG04313 | Yes | COG00105 | Ndk    |
| arCOG04314 | Yes | COG02053 | RPS28A |
| arCOG04318 | Yes | COG02178 |        |
| arCOG04319 | Yes | COG04920 |        |
| arCOG04321 | Yes | COG02848 |        |
| arCOG04323 | Yes |          |        |
| arCOG04324 | Yes |          |        |
| arCOG04325 | no  | COG01702 | PhoH   |
| arCOG04327 | Yes | COG04901 |        |
| arCOG04328 | no  | COG04028 |        |
| arCOG04329 | Yes | COG02441 |        |
| arCOG04331 | Yes | COG05496 |        |
| arCOG04333 | no  | COG00436 |        |
| arCOG04338 | Yes | COG00368 | CobS   |
| arCOG04341 | Yes | COG01996 | RPC12  |
| arCOG04345 | Yes | COG02023 | RPR2   |
| arCOG04346 | Yes | COG01759 |        |
| arCOG04348 | Yes | COG02226 | UbiE   |

|            |     |          |        |
|------------|-----|----------|--------|
| arCOG04349 | Yes | COG03374 |        |
| arCOG04350 | no  | COG01960 | CaiA   |
| arCOG04351 | Yes | COG03356 |        |
| arCOG04352 | Yes | COG00141 | HisD   |
| arCOG04355 | no  | COG01275 | TehA   |
| arCOG04356 | no  | COG03372 | Bax1   |
| arCOG04357 | Yes | COG01059 |        |
| arCOG04358 | no  | COG01526 | FdhD   |
| arCOG04362 | no  | COG04742 |        |
| arCOG04372 | Yes | COG00080 | RplK   |
| arCOG04373 | Yes | COG00011 |        |
| arCOG04383 | Yes | COG01903 | CbiD   |
| arCOG04386 | no  | COG01620 | LldP   |
| arCOG04387 | Yes | COG00104 | PurA   |
| arCOG04394 | no  | COG01416 |        |
| arCOG04397 | Yes | COG00004 | AmtB   |
| arCOG04398 | Yes | COG00131 | HisB   |
| arCOG04409 | Yes | COG02410 |        |
| arCOG04414 | Yes | COG02892 | Pcc1   |
| arCOG04415 | Yes | COG00151 | PurD   |
| arCOG04421 | Yes | COG00152 | PurC   |
| arCOG04426 | Yes | COG00375 | HybF   |
| arCOG04429 | Yes | COG00680 | HyaD   |
| arCOG04430 | Yes | COG01078 |        |
| arCOG04431 | no  | COG00580 | GlpF   |
| arCOG04435 | Yes | COG01892 |        |
| arCOG04458 | Yes | COG02457 |        |
| arCOG04459 | Yes | COG00379 | NadA   |
| arCOG04462 | Yes | COG01828 | PurS   |
| arCOG04465 | Yes | COG00059 | IlvC   |
| arCOG04473 | Yes | COG02097 | RPL31A |
| arCOG04474 | no  |          |        |
| arCOG04479 | Yes | COG03357 |        |
| arCOG04480 | Yes | COG02002 | AbrB   |
| arCOG04489 | no  | COG04689 |        |
| arCOG04502 | Yes | COG02402 |        |
| arCOG04507 | Yes | COG03350 |        |
| arCOG04527 | no  | COG00832 | UreB   |
| arCOG04528 | no  | COG00831 | UreA   |
| arCOG04530 | no  | COG00830 | UreF   |
| arCOG04531 | Yes | COG01914 | MntH   |
| arCOG04536 | Yes | COG01402 |        |
| arCOG04542 | Yes | COG00302 | FoIE   |
| arCOG04548 | Yes | COG01146 |        |
| arCOG04558 | Yes | COG01957 | URH1   |
| arCOG04582 | no  | COG00389 | DinP   |
| arCOG04583 | no  | COG00500 |        |
| arCOG04634 | no  | COG01472 | BglX   |

|            |     |          |           |
|------------|-----|----------|-----------|
| arCOG04641 | Yes | COG02860 |           |
| arCOG04654 | Yes | COG00839 | NuoJ      |
| arCOG04697 | no  |          |           |
| arCOG04702 | Yes | COG01881 |           |
| arCOG04703 | no  | COG03256 | NorB      |
| arCOG04708 | Yes | COG03410 |           |
| arCOG04733 | Yes | COG02042 |           |
| arCOG04756 | no  | COG00679 |           |
| arCOG04761 | Yes | COG01968 | UppP      |
| arCOG04762 | Yes | COG00451 | WcaG      |
| arCOG04779 | Yes | COG01446 |           |
| arCOG04786 | no  | COG03396 |           |
| arCOG04811 | Yes | COG02383 |           |
| arCOG04874 | no  | COG02055 |           |
| arCOG04886 | Yes |          |           |
| arCOG04918 | no  | COG03328 |           |
| arCOG04941 | Yes | COG03830 |           |
| arCOG05042 | Yes | SC.00133 |           |
| arCOG05121 | no  | COG02755 | TesA      |
| arCOG05127 | no  |          |           |
| arCOG05134 | Yes |          | Cas5/Csc1 |
| arCOG05138 | Yes | COG00248 | GppA      |
| arCOG05211 | no  | COG04831 |           |
| arCOG05252 | no  | COG04741 |           |
| arCOG05276 | Yes |          |           |
| arCOG05278 | no  | COG05466 |           |
| arCOG05303 | no  | COG04829 |           |
| arCOG05316 | no  | COG02057 | AtoA      |
| arCOG05317 | no  | COG02721 | UxaA      |
| arCOG05318 | no  | COG02721 |           |
| arCOG05320 | Yes |          |           |
| arCOG05321 | Yes |          |           |
| arCOG05323 | Yes |          |           |
| arCOG05328 | no  |          |           |
| arCOG05331 | no  | COG02391 |           |
| arCOG05332 | Yes | COG01716 |           |
| arCOG05339 | no  |          |           |
| arCOG05341 | no  | COG00477 | ProP      |
| arCOG05342 | Yes |          |           |
| arCOG05344 | no  | COG00477 | ProP      |
| arCOG05348 | Yes | COG00446 | HcaD      |
| arCOG05356 | no  | COG02382 | Fes       |
| arCOG05360 | no  |          |           |
| arCOG05361 | no  | COG02017 | GalM      |
| arCOG05362 | no  |          |           |
| arCOG05367 | no  | COG05592 |           |
| arCOG05370 | no  | COG03386 |           |
| arCOG05371 | no  |          |           |

|            |     |          |      |
|------------|-----|----------|------|
| arCOG05372 | no  | COG01121 | ZnuC |
| arCOG05375 | Yes |          |      |
| arCOG05379 | Yes | COG04754 |      |
| arCOG05380 | Yes | COG02149 |      |
| arCOG05388 | Yes | COG04344 |      |
| arCOG05396 | Yes | COG04272 |      |
| arCOG05398 | Yes | COG00463 |      |
| arCOG05400 | no  |          |      |
| arCOG05401 | Yes |          |      |
| arCOG05403 | Yes | COG02329 | OdsN |
| arCOG05410 | no  | COG00444 | DppD |
| arCOG05411 | no  | COG03934 |      |
| arCOG05412 | no  | COG02723 | BglB |
| arCOG05414 | no  |          |      |
| arCOG05415 | no  |          |      |
| arCOG05416 | no  |          |      |
| arCOG05424 | Yes |          |      |
| arCOG05431 | no  | COG00438 | RfaG |
| arCOG05463 | Yes |          |      |
| arCOG05464 | Yes |          |      |
| arCOG05472 | no  |          |      |
| arCOG05489 | Yes |          |      |
| arCOG05495 | Yes | COG04911 |      |
| arCOG05498 | no  | COG02225 | AceB |
| arCOG05511 | Yes |          |      |
| arCOG05545 | no  |          |      |
| arCOG05546 | Yes |          |      |
| arCOG05628 | no  | COG00730 |      |
| arCOG05632 | no  | COG02391 |      |
| arCOG05633 | no  |          |      |
| arCOG05636 | no  | COG02864 |      |
| arCOG05705 | Yes | COG03839 | MalK |
| arCOG05706 | Yes | COG01506 | DAP2 |
| arCOG05707 | no  |          |      |
| arCOG05710 | Yes |          |      |
| arCOG05713 | Yes |          |      |
| arCOG05825 | Yes | COG01856 |      |
| arCOG05850 | no  | COG02039 | Pcp  |
| arCOG05865 | no  | COG01274 | PckA |
| arCOG05881 | no  |          |      |
| arCOG05883 | Yes |          |      |
| arCOG05884 | Yes |          |      |
| arCOG05885 | Yes |          |      |
| arCOG05886 | Yes |          |      |
| arCOG05887 | no  |          |      |
| arCOG05888 | Yes |          |      |
| arCOG05889 | no  |          |      |
| arCOG05890 | Yes |          |      |

|            |     |          |       |
|------------|-----|----------|-------|
| arCOG05891 | Yes |          |       |
| arCOG05892 | Yes |          |       |
| arCOG05893 | no  |          |       |
| arCOG05894 | Yes |          |       |
| arCOG05895 | Yes | COG02427 |       |
| arCOG05897 | Yes |          |       |
| arCOG05898 | Yes |          |       |
| arCOG05899 | Yes |          |       |
| arCOG05900 | Yes | COG03355 |       |
| arCOG05901 | no  |          |       |
| arCOG05903 | Yes |          |       |
| arCOG05904 | Yes |          |       |
| arCOG05905 | Yes |          |       |
| arCOG05906 | no  |          |       |
| arCOG05907 | Yes |          |       |
| arCOG05908 | no  | COG01633 |       |
| arCOG05910 | no  |          |       |
| arCOG05911 | Yes | COG01826 | TatA  |
| arCOG05912 | Yes |          |       |
| arCOG05913 | Yes |          |       |
| arCOG05914 | no  |          |       |
| arCOG05915 | no  |          |       |
| arCOG05916 | Yes |          |       |
| arCOG05917 | Yes | SC.00142 |       |
| arCOG05918 | Yes |          |       |
| arCOG05919 | Yes | COG00546 | Gph   |
| arCOG05920 | Yes |          |       |
| arCOG05921 | Yes |          |       |
| arCOG05922 | Yes |          |       |
| arCOG05923 | Yes |          |       |
| arCOG05924 | Yes |          |       |
| arCOG05925 | Yes |          |       |
| arCOG05926 | Yes |          |       |
| arCOG05927 | Yes |          |       |
| arCOG05928 | Yes |          |       |
| arCOG05929 | Yes |          |       |
| arCOG05930 | Yes |          |       |
| arCOG05931 | Yes | COG01405 |       |
| arCOG05932 | Yes | COG00491 | GloB  |
| arCOG05933 | Yes |          |       |
| arCOG05934 | Yes |          |       |
| arCOG05935 | Yes |          |       |
| arCOG05937 | Yes | COG00028 | IlvB  |
| arCOG05938 | Yes |          | Rpo13 |
| arCOG05939 | Yes |          |       |
| arCOG05941 | Yes |          |       |
| arCOG05942 | Yes |          |       |
| arCOG05943 | Yes | COG00463 | WcaA  |



|            |     |          |      |
|------------|-----|----------|------|
| arCOG05944 | no  |          |      |
| arCOG05945 | no  |          |      |
| arCOG05946 | Yes |          |      |
| arCOG05947 | Yes |          |      |
| arCOG05948 | Yes |          |      |
| arCOG05949 | Yes |          |      |
| arCOG05950 | Yes |          |      |
| arCOG05951 | Yes |          |      |
| arCOG05952 | Yes |          |      |
| arCOG05953 | Yes |          |      |
| arCOG05954 | Yes |          |      |
| arCOG05955 | Yes |          |      |
| arCOG05956 | Yes |          |      |
| arCOG05957 | Yes |          |      |
| arCOG05958 | Yes |          |      |
| arCOG05959 | Yes | COG00622 |      |
| arCOG05960 | Yes |          |      |
| arCOG05961 | Yes | COG01321 | TroR |
| arCOG05962 | no  |          |      |
| arCOG05963 | no  |          |      |
| arCOG05964 | no  | COG01960 | CaiA |
| arCOG05965 | no  | COG01960 | CaiA |
| arCOG05966 | no  | COG03511 | PlcC |
| arCOG05967 | Yes |          |      |
| arCOG05968 | no  |          |      |
| arCOG05969 | no  | COG03355 |      |
| arCOG05970 | no  |          |      |
| arCOG05971 | Yes | COG00477 |      |
| arCOG05972 | Yes |          |      |
| arCOG05973 | Yes | COG02226 | UbiE |
| arCOG05974 | Yes |          |      |
| arCOG05975 | Yes |          |      |
| arCOG05976 | no  | #N/A     | #N/A |
| arCOG05978 | Yes |          |      |
| arCOG05979 | Yes |          |      |
| arCOG05980 | Yes |          |      |
| arCOG05981 | Yes |          |      |
| arCOG05982 | no  |          |      |
| arCOG05983 | Yes |          |      |
| arCOG05984 | Yes |          |      |
| arCOG05985 | Yes | COG02107 |      |
| arCOG05986 | Yes |          |      |
| arCOG05987 | Yes |          |      |
| arCOG05988 | Yes |          |      |
| arCOG05989 | Yes |          |      |
| arCOG05990 | Yes | COG00604 | Qor  |
| arCOG05991 | Yes |          |      |
| arCOG05992 | Yes |          |      |

|            |     |          |           |
|------------|-----|----------|-----------|
| arCOG05993 | Yes |          |           |
| arCOG05994 | Yes |          |           |
| arCOG05995 | Yes |          |           |
| arCOG05996 | Yes |          |           |
| arCOG05997 | Yes |          |           |
| arCOG05998 | Yes |          |           |
| arCOG05999 | Yes |          |           |
| arCOG06000 | Yes |          |           |
| arCOG06001 | Yes | COG03889 |           |
| arCOG06002 | Yes |          |           |
| arCOG06003 | Yes | COG00226 | PstS      |
| arCOG06004 | Yes | COG03971 |           |
| arCOG06005 | no  | COG03975 |           |
| arCOG06006 | no  |          |           |
| arCOG06007 | Yes |          |           |
| arCOG06008 | Yes |          |           |
| arCOG06009 | no  |          |           |
| arCOG06010 | no  | COG04280 |           |
| arCOG06011 | Yes |          |           |
| arCOG06012 | no  |          |           |
| arCOG06013 | no  |          |           |
| arCOG06014 | no  | COG04194 |           |
| arCOG06015 | Yes |          |           |
| arCOG06016 | Yes |          |           |
| arCOG06017 | Yes |          |           |
| arCOG06018 | no  |          |           |
| arCOG06019 | no  |          | Csa3      |
| arCOG06020 | no  | COG02250 |           |
| arCOG06021 | no  |          |           |
| arCOG06023 | Yes | COG03376 | HoxN      |
| arCOG06024 | no  |          | Cas5/Cmr3 |
| arCOG06025 | Yes |          |           |
| arCOG06026 | Yes | COG01011 |           |
| arCOG06027 | Yes | COG03189 |           |
| arCOG06028 | no  | COG01487 | VapC      |
| arCOG06029 | Yes |          |           |
| arCOG06030 | no  |          |           |
| arCOG06031 | no  | COG05424 |           |
| arCOG06032 | Yes |          |           |
| arCOG06033 | no  |          |           |
| arCOG06034 | Yes |          |           |
| arCOG06035 | Yes |          |           |
| arCOG06036 | no  | COG00208 |           |
| arCOG06037 | no  | COG00346 | GloA      |
| arCOG06038 | Yes |          |           |
| arCOG06039 | Yes |          | SlaA      |
| arCOG06040 | Yes |          |           |
| arCOG06041 | Yes |          |           |

|            |     |          |      |
|------------|-----|----------|------|
| arCOG06042 | Yes | COG00130 | TruB |
| arCOG06043 | no  |          |      |
| arCOG06044 | no  | COG01802 | GntR |
| arCOG06045 | no  | COG03589 |      |
| arCOG06046 | Yes | COG05592 |      |
| arCOG06047 | no  | COG00477 | ProP |
| arCOG06048 | Yes |          |      |
| arCOG06049 | no  | COG03345 |      |
| arCOG06050 | Yes | COG03431 |      |
| arCOG06051 | no  | COG01960 | CaiA |
| arCOG06052 | no  |          |      |
| arCOG06056 | Yes | COG00680 | HyaD |
| arCOG06085 | no  |          |      |
| arCOG06088 | Yes |          |      |
| arCOG06096 | no  |          |      |
| arCOG06103 | no  |          |      |
| arCOG06112 | no  | COG00365 | Acs  |
| arCOG06122 | no  | COG00365 | Acs  |
| arCOG06164 | no  |          |      |
| arCOG06188 | no  | COG02371 | UreE |
| arCOG06207 | Yes | COG03526 |      |
| arCOG06508 | no  | COG03039 |      |
| arCOG06831 | Yes | COG03654 | Doc  |
| arCOG06914 | no  | COG03378 |      |
| arCOG06915 | no  |          |      |
| arCOG06946 | no  |          |      |
| arCOG06947 | no  |          |      |
| arCOG06952 | no  |          |      |
| arCOG06967 | no  |          |      |
| arCOG06975 | no  |          |      |
| arCOG07052 | no  | COG00425 |      |
| arCOG07053 | no  |          |      |
| arCOG07054 | no  | COG03193 | GlcG |
| arCOG07088 | Yes |          |      |
| arCOG07173 | Yes |          |      |
| arCOG07174 | Yes |          |      |
| arCOG07176 | Yes |          |      |
| arCOG07177 | Yes |          |      |
| arCOG07178 | no  |          |      |
| arCOG07179 | no  |          |      |
| arCOG07180 | Yes |          |      |
| arCOG07181 | no  | COG03889 |      |
| arCOG07182 | no  |          |      |
| arCOG07183 | Yes | COG02244 | RfbX |
| arCOG07184 | Yes |          |      |
| arCOG07185 | no  |          |      |
| arCOG07186 | no  |          |      |
| arCOG07187 | no  |          |      |

|            |     |          |      |
|------------|-----|----------|------|
| arCOG07188 | Yes |          |      |
| arCOG07189 | no  |          |      |
| arCOG07190 | no  |          |      |
| arCOG07191 | no  |          |      |
| arCOG07192 | Yes | COG01695 |      |
| arCOG07194 | Yes |          |      |
| arCOG07195 | Yes |          |      |
| arCOG07196 | no  |          |      |
| arCOG07197 | Yes |          |      |
| arCOG07198 | Yes |          |      |
| arCOG07200 | no  |          |      |
| arCOG07202 | no  | COG01988 |      |
| arCOG07204 | no  | COG02267 | PIdB |
| arCOG07205 | no  |          |      |
| arCOG07206 | no  |          |      |
| arCOG07209 | no  |          |      |
| arCOG07210 | Yes |          |      |
| arCOG07211 | no  |          |      |
| arCOG07213 | Yes |          |      |
| arCOG07214 | Yes |          |      |
| arCOG07215 | Yes |          |      |
| arCOG07216 | Yes |          |      |
| arCOG07217 | Yes |          |      |
| arCOG07218 | no  |          |      |
| arCOG07219 | Yes |          |      |
| arCOG07220 | Yes |          |      |
| arCOG07221 | no  |          |      |
| arCOG07222 | no  |          |      |
| arCOG07224 | no  |          |      |
| arCOG07225 | Yes |          |      |
| arCOG07227 | no  |          |      |
| arCOG07228 | no  | COG02608 |      |
| arCOG07229 | no  |          |      |
| arCOG07230 | no  |          |      |
| arCOG07231 | no  |          |      |
| arCOG07232 | no  |          |      |
| arCOG07233 | no  | COG03327 | PaaX |
| arCOG07234 | no  |          |      |
| arCOG07235 | no  | SC.00003 |      |
| arCOG07237 | Yes |          |      |
| arCOG07238 | no  |          |      |
| arCOG07239 | no  |          |      |
| arCOG07240 | no  | COG00463 | WcaA |
| arCOG07243 | no  |          |      |
| arCOG07244 | no  |          |      |
| arCOG07246 | no  |          |      |
| arCOG07247 | no  |          |      |
| arCOG07248 | no  |          |      |

|            |     |          |      |
|------------|-----|----------|------|
| arCOG07249 | no  |          |      |
| arCOG07250 | no  |          |      |
| arCOG07251 | no  |          |      |
| arCOG07252 | no  |          |      |
| arCOG07253 | no  |          |      |
| arCOG07254 | Yes | COG05607 |      |
| arCOG07255 | no  |          |      |
| arCOG07256 | no  |          |      |
| arCOG07257 | no  |          |      |
| arCOG07258 | no  |          |      |
| arCOG07259 | no  |          |      |
| arCOG07260 | no  | COG03191 | DmpA |
| arCOG07262 | Yes |          |      |
| arCOG07263 | no  | COG01735 | Php  |
| arCOG07264 | no  |          |      |
| arCOG07265 | no  |          |      |
| arCOG07267 | no  | COG03733 | TynA |
| arCOG07268 | no  |          |      |
| arCOG07269 | Yes |          |      |
| arCOG07271 | Yes |          |      |
| arCOG07272 | Yes |          | SlaB |
| arCOG07273 | Yes |          |      |
| arCOG07274 | Yes |          |      |
| arCOG07275 | no  |          |      |
| arCOG07276 | Yes |          |      |
| arCOG07277 | no  |          |      |
| arCOG07278 | Yes |          |      |
| arCOG07279 | no  |          |      |
| arCOG07280 | no  |          |      |
| arCOG07281 | no  | COG00457 | NrfG |
| arCOG07282 | no  |          |      |
| arCOG07283 | Yes |          |      |
| arCOG07284 | Yes |          |      |
| arCOG07285 | Yes | COG02811 | NtpF |
| arCOG07286 | Yes |          |      |
| arCOG07287 | Yes |          |      |
| arCOG07288 | no  |          |      |
| arCOG07289 | no  |          |      |
| arCOG07290 | no  |          |      |
| arCOG07291 | no  |          |      |
| arCOG07292 | Yes | COG01708 |      |
| arCOG07293 | no  | COG01192 | Soj  |
| arCOG07294 | no  | COG02308 |      |
| arCOG07295 | no  | COG02307 |      |
| arCOG07296 | Yes |          |      |
| arCOG07297 | no  |          |      |
| arCOG07298 | no  |          |      |
| arCOG07299 | no  |          |      |

|            |     |          |         |
|------------|-----|----------|---------|
| arCOG07300 | no  |          |         |
| arCOG07301 | no  |          |         |
| arCOG07303 | no  | COG00675 |         |
| arCOG07304 | no  |          |         |
| arCOG07305 | Yes |          |         |
| arCOG07307 | no  |          |         |
| arCOG07308 | no  |          |         |
| arCOG07309 | Yes |          | PlrA    |
| arCOG07310 | no  |          |         |
| arCOG07311 | no  |          |         |
| arCOG07312 | no  | SC.00240 |         |
| arCOG07313 | no  |          |         |
| arCOG07314 | Yes |          |         |
| arCOG07315 | no  | COG01502 |         |
| arCOG07316 | no  |          |         |
| arCOG07317 | no  |          |         |
| arCOG07318 | no  |          |         |
| arCOG07319 | no  |          |         |
| arCOG07320 | Yes | COG00247 | GlpC    |
| arCOG07321 | Yes |          |         |
| arCOG07323 | Yes |          |         |
| arCOG07324 | no  |          |         |
| arCOG07325 | no  |          |         |
| arCOG07326 | no  |          |         |
| arCOG07327 | no  |          |         |
| arCOG07329 | Yes |          |         |
| arCOG07330 | no  |          |         |
| arCOG07331 | no  | COG02433 |         |
| arCOG07332 | no  |          |         |
| arCOG07333 | no  |          |         |
| arCOG07334 | no  |          |         |
| arCOG07335 | Yes | COG00500 |         |
| arCOG07337 | no  | COG03250 | LacZ    |
| arCOG07338 | no  | COG03669 |         |
| arCOG07339 | no  |          |         |
| arCOG07340 | no  |          |         |
| arCOG07341 | no  |          |         |
| arCOG07342 | no  |          |         |
| arCOG07343 | no  |          |         |
| arCOG07347 | no  |          |         |
| arCOG07349 | no  | COG01670 | RimL    |
| arCOG07351 | no  |          |         |
| arCOG07450 | no  |          |         |
| arCOG07461 | no  | SC.00158 |         |
| arCOG07493 | no  |          |         |
| arCOG07496 | no  | COG03451 | VirB4   |
| arCOG07501 | no  | COG01994 | SpoIVFB |
| arCOG07520 | no  | COG02442 |         |

|            |     |          |           |
|------------|-----|----------|-----------|
| arCOG07523 | no  |          |           |
| arCOG07527 | no  |          |           |
| arCOG07589 | Yes | COG01848 |           |
| arCOG07714 | no  |          |           |
| arCOG07715 | no  |          |           |
| arCOG07716 | Yes |          |           |
| arCOG07717 | no  |          |           |
| arCOG07718 | Yes |          |           |
| arCOG07719 | no  | COG00535 |           |
| arCOG07720 | no  |          |           |
| arCOG07721 | no  |          |           |
| arCOG07722 | no  |          |           |
| arCOG07723 | no  |          |           |
| arCOG07724 | no  |          |           |
| arCOG07726 | no  |          |           |
| arCOG07727 | no  |          |           |
| arCOG07728 | no  | COG01879 | RbsB      |
| arCOG07730 | no  |          |           |
| arCOG07731 | Yes |          |           |
| arCOG07732 | no  | COG05558 |           |
| arCOG07733 | no  | SC.00162 |           |
| arCOG07734 | no  |          |           |
| arCOG07735 | no  |          |           |
| arCOG07736 | no  |          |           |
| arCOG07775 | no  | COG04638 | HcaE      |
| arCOG07844 | no  |          |           |
| arCOG07846 | no  | COG01604 | Cas7/Cmr6 |
| arCOG07847 | Yes |          |           |
| arCOG07848 | no  |          |           |
| arCOG07849 | Yes |          |           |
| arCOG07850 | no  |          |           |
| arCOG07851 | no  |          |           |
| arCOG07852 | Yes |          |           |
| arCOG07853 | no  |          |           |
| arCOG07922 | no  | SC.00238 |           |
| arCOG07925 | no  | SC.00164 |           |
| arCOG07929 | no  |          |           |
| arCOG07930 | no  |          |           |
| arCOG07934 | Yes | SC.00165 |           |
| arCOG07935 | no  | COG01475 | Spo0J     |
| arCOG07936 | Yes | COG04742 |           |
| arCOG07940 | no  |          |           |
| arCOG07957 | no  | COG02342 |           |
| arCOG07960 | no  | COG02607 |           |
| arCOG07990 | Yes |          |           |
| arCOG08073 | no  |          |           |
| arCOG08078 | Yes |          |           |
| arCOG08086 | no  | COG01848 |           |

|            |     |          |      |
|------------|-----|----------|------|
| arCOG08092 | no  | COG02259 |      |
| arCOG08093 | Yes |          |      |
| arCOG08212 | Yes |          |      |
| arCOG08216 | Yes |          |      |
| arCOG08304 | no  |          |      |
| arCOG08305 | Yes |          |      |
| arCOG08306 | no  | COG01497 |      |
| arCOG08307 | no  |          |      |
| arCOG08308 | Yes |          |      |
| arCOG08309 | Yes |          |      |
| arCOG08310 | no  |          |      |
| arCOG08311 | no  |          |      |
| arCOG08312 | no  |          |      |
| arCOG08313 | no  |          |      |
| arCOG08314 | no  |          |      |
| arCOG08315 | Yes |          |      |
| arCOG08316 | no  |          |      |
| arCOG08317 | no  |          |      |
| arCOG08318 | no  |          |      |
| arCOG08319 | no  |          |      |
| arCOG08320 | Yes |          |      |
| arCOG08321 | no  |          |      |
| arCOG08322 | Yes |          |      |
| arCOG08323 | no  |          |      |
| arCOG08324 | Yes |          |      |
| arCOG08326 | no  |          |      |
| arCOG08328 | no  |          |      |
| arCOG08329 | no  |          |      |
| arCOG08330 | no  |          |      |
| arCOG08331 | no  |          |      |
| arCOG08332 | Yes |          |      |
| arCOG08333 | Yes |          |      |
| arCOG08334 | Yes |          |      |
| arCOG08336 | no  | COG00425 | SirA |
| arCOG08337 | Yes |          |      |
| arCOG08338 | no  |          |      |
| arCOG08340 | no  |          |      |
| arCOG08341 | Yes |          |      |
| arCOG08342 | Yes |          |      |
| arCOG08343 | Yes |          |      |
| arCOG08344 | no  |          |      |
| arCOG08345 | no  |          |      |
| arCOG08346 | no  |          |      |
| arCOG08347 | no  |          |      |
| arCOG08348 | no  |          |      |
| arCOG08349 | no  |          |      |
| arCOG08357 | no  | SC.00156 |      |
| arCOG08361 | no  | COG04228 | TmoE |



|            |     |          |      |
|------------|-----|----------|------|
| arCOG08362 | no  |          | TmoD |
| arCOG08363 | no  |          |      |
| arCOG08364 | no  | COG04228 | TmoA |
| arCOG08372 | Yes |          |      |
| arCOG08375 | no  |          |      |
| arCOG08377 | no  |          |      |
| arCOG08378 | no  |          |      |
| arCOG08380 | Yes |          |      |
| arCOG08395 | no  |          |      |
| arCOG08400 | no  |          |      |
| arCOG08401 | no  |          |      |
| arCOG08402 | no  |          |      |
| arCOG08405 | no  |          |      |
| arCOG08406 | no  |          |      |
| arCOG08408 | no  |          |      |
| arCOG08412 | no  |          |      |
| arCOG08424 | no  |          |      |
| arCOG08426 | no  |          |      |
| arCOG08436 | no  |          |      |
| arCOG08437 | no  |          |      |
| arCOG08438 | no  | COG05517 |      |
| arCOG08442 | no  |          |      |
| arCOG08446 | no  |          |      |
| arCOG08449 | no  |          |      |
| arCOG08451 | no  |          |      |
| arCOG08457 | Yes |          |      |
| arCOG08458 | Yes |          |      |
| arCOG08460 | no  | #N/A     | #N/A |
| arCOG08462 | Yes | SC.00185 |      |
| arCOG08463 | no  | COG02433 |      |
| arCOG08464 | no  |          |      |
| arCOG08465 | no  |          |      |
| arCOG08466 | no  |          |      |
| arCOG08472 | no  |          |      |
| arCOG08473 | no  |          |      |
| arCOG08475 | Yes |          |      |
| arCOG08476 | Yes |          |      |
| arCOG08477 | no  |          |      |
| arCOG08479 | Yes |          |      |
| arCOG08481 | no  | SC.00133 |      |
| arCOG08485 | no  |          |      |
| arCOG08486 | no  |          |      |
| arCOG08497 | no  |          |      |
| arCOG08498 | no  |          |      |
| arCOG08510 | no  |          |      |
| arCOG08511 | no  |          |      |
| arCOG08520 | no  |          |      |
| arCOG08525 | no  |          |      |

|            |     |          |      |
|------------|-----|----------|------|
| arCOG08526 | no  |          |      |
| arCOG08530 | no  |          |      |
| arCOG08538 | Yes |          |      |
| arCOG08539 | no  |          |      |
| arCOG08540 | no  |          |      |
| arCOG08543 | no  |          |      |
| arCOG08552 | no  |          |      |
| arCOG08554 | no  |          |      |
| arCOG08555 | no  |          |      |
| arCOG08557 | no  |          |      |
| arCOG08558 | no  |          |      |
| arCOG08560 | Yes |          |      |
| arCOG08562 | no  |          |      |
| arCOG08563 | no  |          |      |
| arCOG08569 | no  |          |      |
| arCOG08572 | no  |          |      |
| arCOG08574 | no  |          |      |
| arCOG08576 | no  |          |      |
| arCOG08583 | no  |          |      |
| arCOG08584 | no  |          |      |
| arCOG08585 | no  |          |      |
| arCOG08587 | no  |          |      |
| arCOG08588 | no  |          |      |
| arCOG08805 | no  | COG05304 |      |
| arCOG08842 | Yes | COG02188 | PhnF |
| arCOG09692 | no  |          |      |
| arCOG09693 | no  |          |      |
| arCOG09694 | no  |          |      |
| arCOG09695 | no  |          |      |
| arCOG09696 | no  |          |      |
| arCOG09697 | no  |          |      |
| arCOG09698 | no  |          |      |
| arCOG09699 | no  |          |      |
| arCOG09701 | no  |          |      |
| arCOG09703 | no  |          |      |
| arCOG09704 | no  |          |      |
| arCOG09705 | no  |          |      |
| arCOG09706 | no  |          |      |
| arCOG09707 | no  |          |      |
| arCOG09709 | no  |          |      |
| arCOG09710 | no  |          |      |
| arCOG09711 | no  |          |      |
| arCOG09712 | no  |          |      |
| arCOG09713 | no  | COG01846 |      |
| arCOG09855 | no  |          |      |
| arCOG09856 | no  |          |      |
| arCOG09862 | no  |          |      |
| arCOG09866 | no  | SC.00162 |      |

|            |     |          |
|------------|-----|----------|
| arCOG09871 | Yes |          |
| arCOG09879 | no  |          |
| arCOG09882 | no  | COG02192 |
| arCOG09883 | no  |          |
| arCOG09884 | no  |          |
| arCOG09893 | no  |          |
| arCOG09902 | no  |          |
| arCOG09905 | no  |          |
| arCOG09923 | no  |          |
| arCOG09924 | no  |          |
| arCOG09928 | no  |          |
| arCOG09929 | Yes |          |
| arCOG09933 | no  |          |
| arCOG09934 | no  |          |
| arCOG09948 | no  |          |
| arCOG09962 | no  |          |
| arCOG09968 | no  |          |
| arCOG09969 | no  |          |
| arCOG09970 | Yes |          |
| arCOG09989 | no  |          |
| arCOG09991 | no  | SC.00185 |
| arCOG09993 | Yes |          |
| arCOG09995 | no  |          |
| arCOG10002 | Yes | SC.00165 |
| arCOG10005 | no  |          |
| arCOG10007 | no  | COG00829 |
| arCOG10013 | no  |          |
| arCOG10014 | no  |          |
| arCOG10015 | no  | COG04278 |
| arCOG10016 | no  |          |
| arCOG10022 | no  |          |
| arCOG10132 | Yes |          |
| arCOG10174 | no  |          |
| arCOG10215 | no  |          |
| arCOG10265 | Yes |          |
| arCOG10266 | no  |          |
| arCOG10299 | no  |          |
| arCOG10433 | no  |          |
| arCOG10434 | no  |          |
| arCOG10507 | no  |          |
| arCOG10508 | no  |          |
| arCOG10885 | no  |          |
| arCOG11006 | no  |          |
| arCOG11038 | no  |          |
| arCOG11043 | no  |          |
| arCOG11294 | no  |          |
| arCOG11295 | no  |          |
| arCOG11298 | no  |          |

|            |     |          |       |
|------------|-----|----------|-------|
| arCOG11361 | no  | SC.00155 |       |
| arCOG00143 | Yes | COG00477 | ProP  |
| arCOG00462 | Yes | COG01194 | MutY  |
| arCOG00552 | Yes | COG01711 |       |
| arCOG00834 | Yes | COG00454 | WecD  |
| arCOG00934 | Yes | COG01313 | PflX  |
| arCOG00940 | Yes | COG00535 |       |
| arCOG00968 | Yes | COG02428 |       |
| arCOG01187 | Yes | COG00068 | HypF  |
| arCOG01242 | Yes | COG00582 | XerC  |
| arCOG01373 | Yes | COG01089 | Gmd   |
| arCOG01423 | Yes | COG05493 |       |
| arCOG01550 | Yes | COG00374 | HyaB  |
| arCOG01955 | Yes | COG00475 | KefB  |
| arCOG02079 | Yes | COG01361 |       |
| arCOG02474 | Yes | COG01740 | HyaA  |
| arCOG02632 | Yes | COG00286 | HsdM  |
| arCOG02782 | Yes | COG01787 |       |
| arCOG03664 | Yes | COG01215 |       |
| arCOG03812 | Yes | COG03463 |       |
| arCOG04400 | Yes | COG01361 |       |
| arCOG04427 | Yes | COG00298 | HypC  |
| arCOG04428 | Yes | COG00409 | HypD  |
| arCOG05099 | Yes | COG02105 |       |
| arCOG05482 | Yes | COG00467 | RAD55 |
| arCOG06057 | Yes |          |       |
| arCOG06072 | Yes |          |       |
| arCOG06076 | Yes |          |       |
| arCOG06089 | Yes |          |       |
| arCOG06513 | Yes | COG05485 |       |
| arCOG07199 | Yes |          |       |
| arCOG07226 | Yes |          |       |
| arCOG07245 | Yes |          |       |
| arCOG07348 | Yes |          |       |
| arCOG07416 | Yes | COG00596 | MhpC  |
| arCOG07536 | Yes | COG03055 |       |
| arCOG09897 | Yes |          |       |
| arCOG10353 | Yes |          |       |
| arCOG10437 | Yes |          |       |
| arCOG11297 | Yes |          |       |

## Annotation

Predicted transcriptional regulator, PadR family  
Predicted transcriptional regulator, PadR family  
Amino acid transporter  
Sugar kinase, ribokinase family  
Sugar kinase, ribokinase family  
Predicted transcriptional regulator  
Predicted sugar kinase  
Hydroxymethylpyrimidine/phosphomethylpyrimidine kinase  
Predicted transcriptional regulator fused phosphomethylpyrimidine kinase, involved in the thiamin biosynthesis  
Uncharacterized conserved protein  
Glycerol kinase  
Sugar (pentulose and hexulose) kinase  
Orotate phosphoribosyltransferase  
Adenine/guanine phosphoribosyltransferase or related PRPP-binding protein  
Wybutosine (yW) biosynthesis enzyme, Trm5 methyltransferase  
Predicted glutamine amidotransferase involved in pyridoxine biosynthesis  
Predicted ATPase of PP-loop superfamily  
tRNA S(4)U 4-thiouridine synthase  
Predicted PP-loop superfamily ATPase  
Predicted phosphoribosyltransferase  
tRNA(Ile)-lysidine synthase MesJ  
Predicted DNA modification methylase  
Spermidine synthase  
Glucose-6-phosphate isomerase  
3-hexulose-6-phosphate synthase or related protein  
Glucosamine 6-phosphate synthetase  
Predicted phosphosugar isomerase  
Cystathionine beta-lyase/cystathionine gamma-synthase  
Predicted amidohydrolase  
CTP synthase (UTP-ammonia lyase)  
Carbamoylphosphate synthase small subunit  
Selenocysteine lyase/Cysteine desulfurase  
Phosphoribosylpyrophosphate synthetase  
Predicted sugar phosphate isomerase involved in capsule formation  
NH<sub>3</sub>-dependent NAD<sup>+</sup> synthetase  
Glycine/serine hydroxymethyltransferase  
Glycine cleavage system protein P (pyridoxal-binding), C-terminal domain  
Glycine cleavage system protein P (pyridoxal-binding), N-terminal domain  
Fibrillar-like rRNA methylase  
Orotidine-5'-phosphate decarboxylase  
Serine-pyruvate aminotransferase/archaeal aspartate aminotransferase  
Predicted RNA-binding protein, contains THUMP domain  
GMP synthase, PP-ATPase domain/subunit  
Anthranilate/para-aminobenzoate synthase component II  
GMP synthase - Glutamine amidotransferase domain  
Glutamine amidotransferase

GMP synthase - Glutamine amidotransferase domain  
Glutamine phosphoribosylpyrophosphate amidotransferase  
Glutamine phosphoribosylpyrophosphate amidotransferase  
Glutamate synthase domain 1  
Glutamate synthase domain 3  
Phosphoribosylformylglycinamide (FGAM) synthase, glutamine amidotransferase domain  
Cobyrinic acid synthase  
Cobyrinic acid a,c-diamide synthase  
Methylase of polypeptide chain release factors  
16S RNA G1207 methylase RsmC  
Argininosuccinate synthase  
DNA modification methylase  
3'-phosphoadenosine 5'-phosphosulfate sulfotransferase (PAPS reductase)/FAD synthetase or related enzyme  
Permease of the major facilitator superfamily  
ABC-type sugar transport system, periplasmic component  
ABC-type trehalose transport system, periplasmic component  
Maltose-binding periplasmic protein  
ABC-type sugar transport system, periplasmic component  
ABC-type sugar transport system, permease component  
ABC-type sugar transport system, permease component  
ABC-type sugar transport system, permease component  
ABC-type maltose transport system, permease component  
ABC-type sulfate transport system, permease component  
ABC-type phosphate transport system, permease component  
ABC-type phosphate transport system, permease component  
ABC-type anion transport system, duplicated permease component  
ABC-type sugar transport system, ATPase component  
ABC-type spermidine/putrescine transport system, ATPase component  
ABC-type dipeptide/oligopeptide/nickel transport system, ATPase component  
ABC-type dipeptide/oligopeptide/nickel transport system, ATPase component  
ABC-type oligopeptide transport system, ATPase component  
ATPase component of various ABC-type transport system, contain duplicated ATPase  
Predicted ATPase, RNase L inhibitor (RLI) homolog  
ABC-type cobalt transport system, ATPase component  
ABC-type nitrate/sulfonate/bicarbonate transport system, ATPase component  
ABC-type multidrug transport system, ATPase component  
ABC-type multidrug transport system, ATPase component  
ABC-type cobalamin/Fe<sup>3+</sup>-siderophores transport system, ATPase component  
ABC-type oligopeptide transport system, ATPase component  
ABC-type multidrug transport system, ATPase component  
ABC-type phosphate transport system, periplasmic component

Molybdopterin biosynthesis enzyme  
Predicted nucleotide-utilizing enzyme related to molybdopterin-biosynthesis enzyme MoeA  
Molybdopterin biosynthesis enzyme  
Molybdopterin biosynthesis enzyme  
ABC-type molybdate transport system, periplasmic component  
N-terminal domain of molybdenum-binding protein  
ABC-type phosphate transport system, ATPase component  
2-keto-4-pentenoate hydratase/2-oxohepta-3-ene-1,7-dioic acid hydratase (catechol pathway)  
Fumarylacetoacetate (FAA) hydrolase family protein  
Na<sup>+</sup>/H<sup>+</sup> antiporter NhaD or related arsenite permease  
Enoyl-CoA hydratase/carnithine racemase  
Enoyl-CoA hydratase/carnithine racemase  
Prephenate dehydrogenase  
Malate/lactate dehydrogenase  
3-hydroxyisobutyrate dehydrogenase or related beta-hydroxyacid dehydrogenase  
3-hydroxyacyl-CoA dehydrogenase  
3-hydroxyacyl-CoA dehydrogenase  
Predicted UDP-glucose 6-dehydrogenase  
Prephenate dehydratase  
Ribose/xylose/arabinose/galactoside ABC-type transport system, permease component  
Sulfite oxidase or related enzyme  
Sulfite oxidase or related enzyme  
Permease of the drug/metabolite transporter (DMT) superfamily  
S-adenosylmethionine decarboxylase/arginine decarboxylase  
HerA helicase  
HerA helicase  
HerA helicase  
HerA helicase  
HerA helicase  
Predicted NurA-like nuclease  
Nitroreductase  
Metal-dependent phosphoesterase (PHP family)  
RNase P/RNase MRP subunit p30  
Peroxiredoxin  
Peroxiredoxin  
Uncharacterized conserved protein  
Phosphate uptake regulator  
Phosphate uptake regulator  
Predicted Zn-dependent protease or their inactivated homolog  
Predicted Zn-dependent protease or their inactivated homolog  
Predicted Zn-dependent protease or their inactivated homolog  
Deacetylase, including yeast histone deacetylase and acetoin utilization protein  
Deacetylase, including yeast histone deacetylase and acetoin utilization protein  
DNA polymerase elongation subunit (family B)  
DNA polymerase elongation subunit (family B) , inactivated  
Membrane associated Fe-S oxidoreductase  
Fe-S oxidoreductase  
Uncharacterized conserved protein containing ferredoxin-like domain

FAD/FMN-containing dehydrogenase  
Succinate dehydrogenase subunit C  
FAD/FMN-containing dehydrogenase fused to Heterodisulfide reductase, subunit B  
FAD/FMN-containing dehydrogenase  
Heterodisulfide reductase, subunit B  
Fe-S oxidoreductase  
FAD/FMN-containing dehydrogenase  
FAD/FMN-containing dehydrogenase  
Archaeal enzyme of ATP-grasp superfamily  
Predicted GTPase  
Predicted GTPase  
GTP-binding protein protease modulator  
Predicted GTPase, probable translation factor  
Predicted GTPase  
NurA 5'-3' nuclease  
ATPase involved in DNA repair, SbcC  
DNA sulfur modification protein DndD, ATPase  
Predicted membrane-associated transcriptional regulator  
Uncharacterized conserved protein  
Predicted membrane-associated transcriptional regulator  
Transcriptional regulator containing HTH domain, ArsR family  
DNA repair exonuclease, SbcD  
Threonyl-tRNA synthetase  
Prolyl-tRNA synthetase  
Seryl-tRNA synthetase  
Histidyl-tRNA synthetase  
Glycyl-tRNA synthetase (class II)  
Aspartyl/asparaginyl-tRNA synthetase  
Lysyl-tRNA synthetase (class II)  
Phenylalanyl-tRNA synthetase alpha subunit  
Phenylalanyl-tRNA synthetase beta subunit  
RecA/RadA recombinase  
RecA/RadA recombinase  
HIT family hydrolase  
Predicted phosphohydrolase (DHH superfamily)  
Single-stranded DNA-specific exonuclease RecJ  
MoxR-like ATPase  
MoxR-like ATPase  
Predicted ATPase involved in replication control, Cdc46/Mcm family  
Uncharacterized protein containing a von Willebrand factor type A (vWA) domain  
Electron transfer flavoprotein, beta subunit  
Electron transfer flavoprotein, alpha subunit  
Electron transfer flavoprotein, alpha and beta subunits  
Crenarchaeal division protein ESCRT-III  
Crenarchaeal division protein ESCRT-III  
Crenarchaeal division protein ESCRT-III  
Pyrroline-5-carboxylate reductase  
Predicted Zn-dependent protease



EndoIII-related endonuclease  
Uncharacterized protein related to Endonuclease III  
Uri superfamily endonuclease  
Cdc6-related protein, AAA superfamily ATPase  
ATPase involved in DNA replication HolB, small subunit  
ATPase involved in DNA replication HolB, large subunit  
5-formyltetrahydrofolate cyclo-ligase  
5,10-methylenetetrahydrofolate reductase  
4-hydroxybenzoate polyprenyltransferase or related prenyltransferase  
4-hydroxybenzoate polyprenyltransferase or related prenyltransferase  
Polyprenyltransferase (cytochrome oxidase assembly factor)  
Cysteinyl-tRNA synthetase  
Arginyl-tRNA synthetase  
DNA polymerase sliding clamp subunit (PCNA homolog)  
cob(I)alamin adenosyltransferase  
Transcriptional regulators containing a DNA-binding HTH domain and an aminotransferase domain (MocR family)  
Glyceraldehyde-3-phosphate dehydrogenase/erythrose-4-phosphate dehydrogenase  
Aspartate-semialdehyde dehydrogenase  
Acetylglutamate semialdehyde dehydrogenase  
3-phosphoglycerate kinase  
Zn-dependent hydrolase of the beta-lactamase fold  
Metal-dependent hydrolase of the beta-lactamase superfamily II  
Metal-dependent hydrolase of the beta-lactamase superfamily  
Metal-dependent hydrolase of the beta-lactamase superfamily  
Metal-dependent hydrolase of the beta-lactamase superfamily II  
Metal-dependent hydrolase of the beta-lactamase superfamily II  
Metal-dependent hydrolase of the beta-lactamase superfamily II  
Uncharacterized flavoprotein  
Zn-dependent hydrolase, glyoxylase family  
Multimeric flavodoxin WrbA  
Metal-dependent hydrolase of the beta-lactamase superfamily II  
Rhodanese Homology Domain fused to Zn-dependent hydrolase of glyoxylase family  
Molybdopterin-guanine dinucleotide biosynthesis protein  
Molybdopterin converting factor, large subunit  
Sulfur transfer protein involved in thiamine biosynthesis  
Molybdopterin converting factor, small subunit  
Ubiquitin-like protein  
Predicted exonuclease of the beta-lactamase fold involved in RNA processing  
Predicted metal-dependent RNase, consists of a metallo-beta-lactamase domain and an RNA-binding KH domain  
Predicted exonuclease of the beta-lactamase fold involved in RNA processing  
DNA replication initiation complex subunit, GINS15 family  
Replicative SFII helicase  
Distinct helicase family with a unique C-terminal domain including a metal-binding cysteine cluster  
Lhr-like helicase  
Superfamily II DNA and RNA helicase  
Predicted membrane-bound dolichyl-phosphate-mannose-protein mannosyltransferase  
Uncharacterized conserved protein  
Dehydrogenase (flavoprotein)

Succinate dehydrogenase/fumarate reductase, flavoprotein subunit  
Aspartate oxidase  
Ribulose 1,5-bisphosphate synthetase, converts PRPP to RuBP, flavoprotein  
Predicted divalent heavy-metal cations transporter  
Uncharacterized Zn-finger containing protein  
DNA-directed RNA polymerase, subunit M/Transcription elongation factor TFIIIS  
DNA-directed RNA polymerase, subunit M/Transcription elongation factor TFIIIS  
PEP phosphonmutase or related enzyme  
Isocitrate lyase  
Ketopantoate hydroxymethyltransferase  
Mrp family protein, ATPase, contains iron-sulfur cluster  
ATPase involved in chromosome partitioning, ParA family  
CobQ/CobB/MinD/ParA ATPase  
CBS domain  
Protein containing two CBS domains (some fused to C-terminal double-stranded RNA-binding domain of RaiA fami  
Dihydroorotate dehydrogenase  
CBS domain  
Predicted transcriptional regulator with C-terminal CBS domains  
Predicted transcriptional regulator, contains C-terminal CBS domains  
Isopentenyl diphosphate isomerase  
Zn-dependent protease  
NADH:flavin oxidoreductase, Old Yellow Enzyme family  
Imidazoleglycerol-phosphate synthase  
Phosphoribosylformimino-5-aminoimidazole carboxamide ribonucleotide (ProFAR) isomerase  
Glutamate synthase domain 2 and ferredoxin domain  
Mg/Co/Ni transporter MgtE (contains CBS domain)  
CBS domain  
Hydrogenase maturation factor  
Hydrogenase maturation factor  
Thiamine monophosphate kinase  
Phosphoribosylaminoimidazole (AIR) synthetase  
Phosphoribosylformylglycinamidine (FGAM) synthase, synthetase domain  
Selenophosphate synthase  
Uroporphyrinogen-III methylase  
Precorrin-4 methylase  
Uroporphyrinogen-III methylase  
Precorrin-3B methylase  
Precorrin-2 methylase  
Precorrin-6B methylase 1  
Cobalamin biosynthesis protein CbiG  
Cobalamin biosynthesis protein CbiG  
Predicted periplasmic solute-binding protein  
Lipoate synthase  
Biotin synthase-related enzyme  
Nucleoside-diphosphate-sugar pyrophosphorylase involved in lipopolysaccharide biosynthesis/translation initiatio  
dTDP-glucose pyrophosphorylase  
UDP-glucose pyrophosphorylase  
N-acetylglucosamine-1-phosphate uridylyltransferase

dTDP-glucose pyrophosphorylase  
Phosphatidylglycerophosphate synthase  
DNA-directed RNA polymerase, subunit E'  
Predicted RNA-binding protein (consists of S1 domain and a Zn-ribbon domain)  
RNA-binding protein Rrp4 or related protein (contain S1 domain and KH domain)  
Transposase  
Transposase  
Transposase  
Transposase  
Dihydroorotase or related cyclic amidohydrolase  
Cytosine deaminase or related metal-dependent hydrolase  
Cytosine deaminase or related metal-dependent hydrolase  
Imidazolonepropionase or related amidohydrolase  
Cytosine deaminase or related metal-dependent hydrolase  
Urea amidohydrolase (urease) alpha subunit  
N-acetylglucosamine-6-phosphate deacetylase  
Glycerophosphoryl diester phosphodiesterase  
PIN domain containing protein  
PIN domain containing protein  
PIN domain containing protein  
Endonuclease Nob1, consists of a PIN domain and a Zn-ribbon module  
Uncharacterized conserved protein  
Predicted transcriptional regulator, PadR family  
PIN domain containing protein  
PIN domain containing protein  
PIN domain containing protein  
Transcriptional regulator containing HTH domain, ArsR family  
Transcriptional regulator, MarR family  
Transcriptional regulator containing HTH domain  
ABC-type dipeptide/oligopeptide/nickel transport system, permease component  
ABC-type dipeptide/oligopeptide/nickel transport system, permease component  
ABC-type dipeptide/oligopeptide/nickel transport system, permease component  
Glycerol-3-phosphate dehydrogenase  
Glycine/D-amino acid oxidase (deaminating)  
Glycine cleavage system T protein (aminomethyltransferase)  
Glycine/D-amino acid oxidase (deaminating)  
Glycine/D-amino acid oxidase (deaminating)  
Beta-methylmalyl-CoA lyase (Citrate lyase beta subunit family)  
Uncharacterized conserved protein  
Phosphomannomutase  
Putative intracellular protease/amidase  
Rad3-related DNA helicase  
Acyl-CoA hydrolase  
Mesaconyl-CoA hydratase (Acyl dehydratase family)  
HGG motif-containing thioesterase, possibly involved in aromatic compounds catabolism  
Ribosomal protein L15  
Ribosomal protein L18E  
Ribosomal protein L32E

Ribosomal protein S14  
RNase P/RNase MRP subunit p29  
Ribosomal protein L29  
CRISPR-associated protein Cas4, RecB family exonuclease  
CRISPR-associated protein Cas4, RecB family exonuclease  
Superfamily I DNA/RNA helicase  
Isoleucyl-tRNA synthetase  
Valyl-tRNA synthetase  
Leucyl-tRNA synthetase  
Methionyl-tRNA synthetase  
Transcriptional regulator AbrB  
Acetyltransferase (GNAT) family  
Acetyltransferase (GNAT) family  
Acetyltransferase (GNAT) family  
Malic enzyme  
Acyl-CoA synthetase (AMP-forming)/AMP-acid ligase II  
Acyl-CoA synthetase (AMP-forming)/AMP-acid ligase II  
Uridylate kinase  
Isopentenyl phosphate kinase, enzyme of modified mevalonate pathway  
Aspartokinase  
Acetylglutamate kinase  
Archaeal/vacuolar-type H<sup>+</sup>-ATPase subunit B  
Archaeal/vacuolar-type H<sup>+</sup>-ATPase subunit A  
Archaeal/vacuolar-type H<sup>+</sup>-ATPase subunit E  
Superfamily II DNA/RNA helicase, SNF2 family  
ssDNA-dependent ATPase, helicase superfamily II  
DNA or RNA helicase of superfamily II  
Superfamily II DNA/RNA helicase, SNF2 family  
Predicted ATPase (AAA+ superfamily)  
Adenine-specific DNA methylase containing a Zn-ribbon  
DNA modification methylase  
Mg-dependent DNase  
Glycosyltransferase  
Glycosyltransferase  
Uracil-DNA glycosylase  
Predicted Zn-ribbon RNA-binding protein  
Predicted RNA methylase  
Aspartate carbamoyltransferase, catalytic chain  
Ornithine carbamoyltransferase  
Ornithine/acetylornithine aminotransferase

4-aminobutyrate aminotransferase or related aminotransferase  
4-aminobutyrate aminotransferase or related aminotransferase  
Glutamate-1-semialdehyde aminotransferase  
Holliday junction resolvase  
ABC-type antimicrobial peptide transport system, ATPase component  
ABC-type branched-chain amino acid transport system, ATPase component  
ABC-type branched-chain amino acid transport system, ATPase component  
Endonuclease V homolog  
Deoxyinosine 3'endonuclease (endonuclease V)  
Molybdenum cofactor biosynthesis enzyme  
Radical SAM superfamily enzyme  
Uncharacterized conserved protein related to pyruvate formate-lyase activating enzyme  
Radical SAM superfamily enzyme  
Radical SAM superfamily enzyme  
Radical SAM superfamily enzyme  
Pyruvate-formate lyase-activating enzyme  
Ferrodoxin  
Succinate dehydrogenase/fumarate reductase, Fe-S protein subunit  
Heterodisulfide reductase, subunit C  
Heterodisulfide reductase, subunit C  
tRNA m(1)G methyltransferase  
Predicted hydrolase (metallo-beta-lactamase superfamily)  
20S proteasome, beta subunit  
20S proteasome, alpha subunit  
Nicotinamide mononucleotide adenylyltransferase  
tRNA or rRNA cytosine-C5-methylase  
tRNA or rRNA cytosine-C5-methylase  
Protein-L-isoaspartate carboxylmethyltransferase  
Precorrin-6B methylase 2  
tRNA(1-methyladenosine) methyltransferase  
FKBP-type peptidyl-prolyl cis-trans isomerase 2  
Glycerol dehydrogenase or related enzyme  
3-dehydroquinate synthetase  
Alcohol dehydrogenase, class IV  
Predicted RNA-binding protein (contains PUA domain)  
RNA methylase associated PUA domain  
Pseudouridine synthase  
Queuine/archaeosine tRNA-ribosyltransferase  
tRNA modification protein, contains pre-PUA and PUA domains  
Protein involved in ribosomal biogenesis, contains PUA domain  
Queuine tRNA-ribosyltransferase related protein  
Queuine/archaeosine tRNA-ribosyltransferase  
Small nuclear ribonucleoprotein (snRNP) homolog  
Small nuclear ribonucleoprotein (snRNP) homolog  
Xaa-Pro aminopeptidase  
Methionine aminopeptidase  
Predicted acetamidase/formamidase  
ABC-type Fe<sup>3+</sup>-siderophore transport system, permease component

Transcriptional regulator, CopG/Arc/MetJ family (DNA-binding and a metal-binding domains)  
Ribbon-helix-helix protein, copG family  
Antitoxin (DNA-binding domain) of toxin-antitoxin stability system  
Ribosomal protein L13E  
Predicted pseudouridylate synthase  
DNA-directed RNA polymerase, subunit F (rpoF)  
rRNA methylase  
SpoU rRNA Methylase family enzyme  
ABC-type branched-chain amino acid transport system, periplasmic component  
Archaeal shikimate kinase  
Predicted sugar kinase  
Homoserine kinase  
Mevalonate kinase  
Phosphomevalonate kinase  
Shikimate 5-dehydrogenase  
Predicted nucleotide kinase  
Alanine dehydrogenase, mu-crystallin homolog  
Glutamyl-tRNA reductase  
Cytidylate kinase  
Predicted nucleotide kinase (CMP/AMP kinase related)  
Archaeal adenylate kinase  
Exosome subunit, RNA binding protein with dsRBD fold  
Predicted RNA binding protein with dsRBD fold  
Siroheme synthase (precorrin-2 oxidase/ferrochelatase domain)  
Dephospho-CoA kinase  
3-deoxy-D-arabino-heptulosonate 7-phosphate (DAHP) synthase  
Transketolase, C-terminal subunit  
Pyruvate/2-oxoglutarate/acetoin dehydrogenase complex, dehydrogenase (E1) component  
Transketolase, N-terminal subunit  
Pyruvate/2-oxoglutarate/acetoin dehydrogenase complex, dehydrogenase (E1) component, eukaryotic type, alpha  
Predicted transcriptional regulator  
Predicted transcriptional regulator  
NAD(FAD)-dependent dehydrogenase  
NAD(FAD)-dependent dehydrogenase  
NADH dehydrogenase, FAD-containing subunit  
Pyruvate/2-oxoglutarate dehydrogenase complex, dihydrolipoamide dehydrogenase (E3) component or related er  
CoA-dependent NAD(P)H Sulfur Oxidoreductase  
NAD(FAD)-dependent dehydrogenase  
NUDIX family hydrolase  
NUDIX family hydrolase  
NUDIX family hydrolase  
NUDIX family hydrolase  
Predicted pyrophosphatase  
Predicted phosphate-binding enzyme, TIM-barrel fold  
Tryptophan synthase alpha chain  
Triosephosphate isomerase  
Indole-3-glycerol phosphate synthase  
Uncharacterized membrane protein

Protein distantly related to bacterial ferritins  
Ferritin-like domain containing protein  
Rubrerythrin  
Uncharacterized conserved protein  
Uncharacterized conserved protein  
Acetylornithine deacetylase/Succinyl-diaminopimelate desuccinylase or related deacylase  
Metal-dependent amidase/aminoacylase/carboxypeptidase  
Acetylornithine deacetylase/Succinyl-diaminopimelate desuccinylase or related deacylase  
Acetylornithine deacetylase/Succinyl-diaminopimelate desuccinylase or related deacylase  
Phosphoenolpyruvate synthase/pyruvate phosphate dikinase  
Phosphoenolpyruvate synthase/pyruvate phosphate dikinase  
tRNA(Ile2) 2-agematinylycytidine synthetase; containing Zn-ribbon domain and OB-fold domain  
Lrp/AsnC family C-terminal domain  
GYD domain, alpha/beta barrel superfamily  
SWIM zinc finger  
Ribose 5-phosphate isomerase  
Translation initiation factor eIF-2B alpha subunit  
Transcriptional activator TenA  
Transcriptional activator TenA  
Aspartate/tyrosine/aromatic aminotransferase  
EMAP domain RNA-binding protein  
Thioesterase superfamily enzyme  
Predicted metal-dependent protease of the PAD1/JAB1 superfamily  
Phosphoesterase  
Serine/threonine protein phosphatase PP2A family  
Icc family phosphoesterase  
Metallophosphoesterase superfamily enzyme  
Calcineurin-like phosphoesterase  
Metallophosphoesterase superfamily enzyme  
Calcineurin-like phosphoesterase superfamily protein  
Uncharacterized archaeal coiled-coil protein  
Isocitrate/isopropylmalate dehydrogenase  
Isocitrate dehydrogenase  
DNA topoisomerase VI, subunit B  
Aerobic-type carbon monoxide dehydrogenase, large subunit CoxL/CutL homolog  
L-alanine-DL-glutamate epimerase or related enzyme of enolase superfamily  
Enolase  
RecA-superfamily ATPase implicated in signal transduction  
Translation initiation factor 1 (IF-1)  
Serine/threonine protein kinase involved in cell cycle control  
RIO-like serine/threonine protein kinase fused to N-terminal HTH domain  
Predicted Ser/Thr protein kinase  
Subunit of KEOPS complex, contains a domain with ASKHA fold and RIO-type kinase (AP-endonuclease activity)  
Mn<sup>2+</sup>-dependent serine/threonine protein kinase  
Mn<sup>2+</sup>-dependent serine/threonine protein kinase  
Predicted unusual protein kinase  
HEPN domain containing protein  
HEPN domain containing protein

Minimal nucleotidyltransferase  
Uncharacterized conserved protein  
HAD superfamily hydrolase  
Signal recognition particle 19 kDa protein  
Thiol-disulfide isomerase or thioredoxin  
N2,N2-dimethylguanosine tRNA methyltransferase  
Inosine/xanthosine triphosphatase  
Cytidylyltransferase fused to conserved domain of DUF357 family  
Uncharacterized conserved protein  
GTPase SAR1 or related small G protein  
Putative periplasmic protein kinase ArgK or related GTPase of G3E family  
Signal recognition particle GTPase  
Signal recognition particle GTPase  
Ni<sup>2+</sup>-binding GTPase involved in regulation of expression and maturation of urease and hydrogenase  
Heme/copper-type cytochrome/quinol oxidase, subunit 2  
Heme/copper-type cytochrome/quinol oxidase, subunit 2  
Heme/copper-type cytochrome/quinol oxidase, subunit 1 and 3  
Heme/copper-type cytochrome/quinol oxidase, subunit 1  
Integrase  
Integrase/Recombinase  
Site-specific recombinase XerD  
Lactaldehyde dehydrogenase, Succinate semialdehyde dehydrogenase or other NAD-dependent aldehyde dehydrogenase  
Predicted metal-dependent hydrolase related to alanyl-tRNA synthetase HxxxH domain and second additional domain  
Alanyl-tRNA synthetase  
Predicted metal-dependent hydrolase related to alanyl-tRNA synthetase HxxxH domain  
Chaperonin GroEL (HSP60 family)  
Short-chain alcohol dehydrogenase  
Short-chain alcohol dehydrogenase  
Short-chain alcohol dehydrogenase  
Short-chain dehydrogenase  
DNA-directed RNA polymerase subunit K/omega  
Branched-chain amino acid ABC-type transport system, permease component  
ABC-type branched-chain amino acid transport system, permease component  
Acetyl-CoA acetyltransferase  
Acetyl-CoA acetyltransferase  
Acetyl-CoA acetyltransferase  
Acetyl-CoA acetyltransferase  
Acetyl-CoA acetyltransferase  
Predicted nucleic-acid-binding protein containing a Zn-ribbon  
Predicted nucleic-acid-binding protein containing a Zn-ribbon  
Predicted nucleic-acid-binding protein containing a Zn-ribbon



Predicted nucleic-acid-binding protein containing a Zn-ribbon  
OB-fold domain and Zn-ribbon containing protein, possible acyl-CoA-binding protein  
Predicted nucleic-acid-binding protein containing a Zn-ribbon  
DNA repair photolyase  
NADPH-dependent glutamate synthase beta chain or related oxidoreductase  
Thioredoxin reductase  
NAD(FAD)-dependent dehydrogenase  
Uncharacterized conserved protein  
Glycine cleavage system H protein (lipoate-binding)  
RecB family endonuclease acting on branched DNA substrates  
ATP-dependent 26S proteasome regulatory subunit  
Cell division ATPase of the AAA+ class, ESCRT system component  
ATPase of the AAA+ class , CDC48 family  
Uncharacterized conserved membrane protein  
Na<sup>+</sup>/proline symporter  
3,4-dihydroxy-2-butanone 4-phosphate synthase  
Archaeal riboflavin synthase  
Riboflavin synthase beta-chain  
Uridine phosphorylase  
Purine-nucleoside phosphorylase  
Purine nucleoside phosphorylase  
Zn-dependent protease with chaperone function  
Zn-dependent protease with chaperone function  
Zn-dependent protease with chaperone function  
Uncharacterized conserved protein  
Succinyl-CoA synthetase, beta subunit  
Acyl-CoA synthetase, ATP-grasp containing subunit  
Succinyl-CoA synthetase, alpha subunit  
Acyl-CoA synthetase (NDP forming)  
Predicted prefoldin, molecular chaperone implicated in de novo protein folding  
Prefoldin, chaperonin cofactor  
Ribosomal protein S19E (S16A)  
Predicted RNA-binding protein containing KH domain, possibly ribosomal protein  
ATP-dependent DNA ligase  
NAD kinase  
Archaeal fructose-1,6-bisphosphatase or related enzyme of inositol monophosphatase family  
Predicted inorganic polyphosphate/ATP-NAD kinase  
Homoserine dehydrogenase  
Glutamate dehydrogenase/leucine dehydrogenase  
Subunit of KEOPS complex (Cgi121BUD32KAE1)  
Radical SAM superfamily enzyme  
Radical SAM superfamily enzyme  
2-methylthioadenine synthetase  
Histone acetyltransferase  
RNase P/RNase MRP subunit POP5  
dTDP-4-dehydrorhamnose reductase  
Nucleoside-diphosphate-sugar epimerase  
dTDP-D-glucose 4,6-dehydratase

Phosphodiesterase of AP superfamily  
Uncharacterized protein of the AP superfamily  
Glycosyltransferase  
Predicted glycosyltransferase  
Glycosyltransferase  
Glycosyltransferase  
Glycosyltransferase  
UDP-N-acetylglucosamine:LPS N-acetylglucosamine transferase  
Glycosyltransferase  
Glycosyltransferase  
SAM-dependent methyltransferase  
SAM-dependent methyltransferase  
SAM-dependent methyltransferase  
Glycosyltransferase  
Glycosyltransferase  
Glycosyltransferase  
Glycosyltransferase  
Glycosyltransferase  
Glycosyltransferase  
Glycosyltransferase  
Glycogen synthase  
Glucan phosphorylase  
RecB-like nuclease fused to coiled-coil domain  
RecB-nuclease fused to coiled-coil domain  
RecB family nuclease with coiled-coil N-terminal domain  
RecB family nuclease with coiled-coil N-terminal domain, paREP7 family protein  
Cysteine synthase  
Threonine dehydratase  
Tryptophan synthase beta-subunit  
Threonine synthase and cysteate synthase  
CRISPR system related protein, RAMP superfamily Cas6 group  
CRISPR system related protein, RAMP superfamily Cas6 group  
HD superfamily nuclease  
HD superfamily nuclease  
CRISPR-associated helicase Cas3  
Transcriptional regulator containing HTH domain, ArsR family  
CRISPR-associated protein Cas1  
Zn-dependent alcohol dehydrogenase  
Zn-dependent alcohol dehydrogenase  
D-arabinose 1-dehydrogenase or another Zn-dependent alcohol dehydrogenase  
NADPH:quinone reductase or related Zn-dependent oxidoreductase  
Threonine dehydrogenase or related Zn-dependent dehydrogenase  
ABC-type Na<sup>+</sup> efflux pump, permease component  
ABC-type multidrug transport system, permease component

Hemerythrin HHE cation binding domain containing protein  
Co/Zn/Cd efflux system component  
Predicted Co/Zn/Cd cation transporter  
Nicotinic acid phosphoribosyltransferase  
Nicotinate-nucleotide pyrophosphorylase  
Pyrimidine reductase, riboflavin biosynthesis  
Anaerobic dehydrogenase  
Uncharacterized anaerobic dehydrogenase  
Molybdopterin oxidoreductase  
Molybdopterin oxidoreductase, contains molybdopterin-binding domain  
Fe-S-cluster-containing dehydrogenase component  
Fe-S-cluster-containing dehydrogenase component  
Uncharacterized component of anaerobic dehydrogenase  
Uncharacterized component of anaerobic dehydrogenase  
Single-stranded DNA-binding replication protein A (RPA), large (70 kD) subunit or related ssDNA-binding protein  
N-methylhydantoinase A/acetone carboxylase, beta subunit  
N-methylhydantoinase B/acetone carboxylase, alpha subunit  
Phytoene dehydrogenase or related enzyme  
Reverse gyrase  
Topoisomerase IA  
Acyl-coenzyme A synthetase/AMP-(fatty) acid ligase  
Molybdenum cofactor biosynthesis enzyme  
Transcriptional regulator, contains wHTH domain  
Undecaprenyl pyrophosphate synthase  
ABC-type transport system, periplasmic component  
ABC-type transport system, periplasmic component  
ABC-type transport system, periplasmic component  
NADH:ubiquinone oxidoreductase subunit 4 (chain M)  
NADH dehydrogenase subunit L  
NADH dehydrogenase subunit N  
NADH dehydrogenase subunit I  
Formate hydrogenlyase subunit 4  
NADH dehydrogenase subunit H  
Ni,Fe-hydrogenase III large subunit and subunit G  
NADH dehydrogenase subunit D  
NADH dehydrogenase subunit C  
Ni,Fe-hydrogenase III small subunit  
F420H2 dehydrogenase subunit, related to NADH:ubiquinone oxidoreductase 20 kD subunit  
NADH dehydrogenase subunit A  
Translation elongation factor G, EF-G (GTPase)  
Translation initiation factor 2 (IF-2; GTPase)  
Translation elongation factor EF-1alpha (GTPase)  
GTPase  
Translation initiation factor 2, gamma subunit (eIF-2gamma; GTPase)  
Selenocysteine-specific translation elongation factor or SelB-II domain  
Small-conductance mechanosensitive channel  
Uncharacterized conserved membrane protein  
Small-conductance mechanosensitive channel

RNase PH-related exoribonuclease  
Ribonuclease PH  
Cation transport ATPase  
Cation transport ATPase  
Transcriptional regulator, IclR family  
Transcriptional regulator (Lrp/AsnC family)  
Transcriptional regulator (Lrp/AsnC family)  
Transcriptional regulator (Lrp/AsnC family)  
lysine biosynthesis protein LysW  
Glutathione synthase/glutaminyl transferase/alpha-L-glutamate ligase  
Biotin carboxylase  
Carbamoylphosphate synthase large subunit  
Phosphoribosylaminoimidazole carboxylase (NCAIR synthetase)  
Formate-dependent phosphoribosylglycinamide formyltransferase (GAR transformylase)  
Pyruvate:ferredoxin oxidoreductase or related 2-oxoacid:ferredoxin oxidoreductase, beta subunit  
Pyruvate:ferredoxin oxidoreductase or related 2-oxoacid:ferredoxin oxidoreductase, beta subunit  
Pyruvate:ferredoxin oxidoreductase or related 2-oxoacid:ferredoxin oxidoreductase, gamma subunit  
Pyruvate:ferredoxin oxidoreductase or related 2-oxoacid:ferredoxin oxidoreductase, gamma subunit  
Pyruvate:ferredoxin oxidoreductase or related 2-oxoacid:ferredoxin oxidoreductase, gamma and delta subunit  
Pyruvate:ferredoxin oxidoreductase or related 2-oxoacid:ferredoxin oxidoreductase, delta subunit  
Pyruvate:ferredoxin oxidoreductase or related 2-oxoacid:ferredoxin oxidoreductase, alpha subunit and gamma  
Pyruvate:ferredoxin oxidoreductase or related 2-oxoacid:ferredoxin oxidoreductase, alpha subunit  
Indolepyruvate ferredoxin oxidoreductase, alpha and beta subunit  
Predicted membrane protein  
D-aminoacyl-tRNA deacylase, involved in ethanol tolerance  
Predicted oxidoreductase (related to aryl-alcohol dehydrogenase)  
Aldo/keto reductase, related to diketogulonate reductase  
Aldo/keto reductase, related to diketogulonate reductase  
Predicted dehydrogenase  
Transcriptional regulator (Lrp/AsnC family)  
Putative translation initiation inhibitor, yjgF family  
SAM-dependent methyltransferase  
Translation initiation factor 2, beta subunit (eIF-2beta)/eIF-5 N-terminal domain  
Dipeptidyl aminopeptidase/acylaminoacyl-peptidase  
Serine protease of the peptidase family S9A  
Alpha/beta superfamily hydrolase  
Dienelactone hydrolase or related enzyme  
Cytotoxic translational repressor of toxin-antitoxin stability system  
Cytotoxic translational repressor of toxin-antitoxin stability system  
Zinc finger domain containing protein (CDGSH-type)  
Uncharacterized conserved protein  
Uncharacterized conserved protein  
Predicted peroxiredoxin  
3-polyprenyl-4-hydroxybenzoate decarboxylase or related decarboxylase  
Predicted solute binding protein  
ABC-type transport system, periplasmic component  
Acylphosphatase  
Dinucleotide-utilizing enzyme involved in molybdopterin and thiamine biosynthesis

Archaeal S-adenosylmethionine synthetase  
Transcriptional regulator containing HTH domain, ArsR family  
Transcriptional regulator containing HTH domain, ArsR family  
Predicted RNA-binding protein homologous to eukaryotic snRNP  
2,3-bisphosphoglycerate-independent phosphoglycerate mutase  
Aconitase A  
Homoaconitate hydratase/3-isopropylmalate dehydratase large subunit family protein  
Uncharacterized conserved protein  
Arginase family enzyme  
tRNA splicing endonuclease  
tRNA splicing endonuclease  
3-polyprenyl-4-hydroxybenzoate decarboxylase  
Phosphopantothoenylcysteine synthetase/decarboxylase  
Pyruvate/2-oxoglutarate dehydrogenase complex, dihydrolipoamide acyltransferase (E2) component or related er  
Acyl-CoA dehydrogenase  
Methylmalonyl-CoA mutase, C-terminal domain/subunit (cobalamin-binding)  
Inorganic pyrophosphatase  
Uncharacterized conserved protein  
Uncharacterized conserved protein  
Cysteine desulfurase activator SufB  
Asp-tRNAAsn/Glu-tRNA<sup>Gln</sup> amidotransferase A subunit or related amidase  
Asp-tRNAAsn/Glu-tRNA<sup>Gln</sup> amidotransferase B subunit  
Archaeal Glu-tRNA<sup>Gln</sup> amidotransferase subunit E (contains GAD domain)  
Rieske Fe-S protein  
Cytochrome b subunit of the bc complex  
Ribosomal protein S13  
Adenylate cyclase, class 2 (thermophilic)  
Geranylgeranyl pyrophosphate synthase  
Geranylgeranyl pyrophosphate synthase  
Predicted dioxygenase  
Aromatic ring-opening dioxygenase, catalytic LigB subunit related enzyme  
2'-5' RNA ligase  
Signal peptidase I  
Signal peptidase I  
Release factor eRF1  
Peptide chain release factor 1 (eRF1)  
Adenylosuccinate lyase  
Argininosuccinate lyase  
Fumarase  
Ribosomal protein L7AE  
Ribosomal protein L30E  
Archaeal DNA-binding protein  
Phosphoglycerate dehydrogenase or related dehydrogenase  
Lactate dehydrogenase or related 2-hydroxyacid dehydrogenase  
Ribosomal protein S10  
Uncharacterized conserved protein  
Transcription elongation factor  
Transcription elongation factor

DNA-directed RNA polymerase subunit B  
TATA-box binding protein (TBP), component of TFIID and TFIIB  
3-hydroxy-3-methylglutaryl CoA synthase  
Membrane associated serine protease  
SAM-dependent methyltransferase  
SAM-dependent methyltransferase  
SAM-dependent methyltransferase  
SAM-dependent methyltransferase  
SAM-dependent methyltransferase  
Predicted transcriptional regulator  
Flp pilus assembly protein TadC  
Archaeal flagella assembly protein J  
Flp pilus assembly protein TadC  
Type IV secretory pathway, VirB11 component, or related ATPase involved in archaeal flagella biosynthesis  
Putative archaeal flagellar protein G  
Putative archaeal flagellar protein F  
Archaeal flagellins  
Predicted nucleotidyltransferase  
Predicted nucleotidyltransferase  
Molecular chaperone (HSP20 family)  
Molecular chaperone (HSP20 family)  
Molecular chaperone (HSP20 family)  
Putative sterol carrier protein  
Predicted metal-sulfur cluster biosynthetic enzyme  
Isoleucine patch superfamily protein  
Predicted metal-sulfur cluster biosynthetic enzyme  
SpoU rRNA Methylase family enzyme  
Predicted transcription factor, homolog of eukaryotic MBF1  
Fe<sup>2+</sup>/Zn<sup>2+</sup> uptake regulation protein, fur/PerR  
Adenosylcobinamide amidohydrolase  
GTP:adenosylcobinamide-phosphate guanylyltransferase  
Molybdopterin-guanine dinucleotide biosynthesis protein A  
GT-A family glycosyltransferase involved in molybdopterin guanine dinucleotide biosynthesis  
ParB-like nuclease domain  
Methionine synthase II (cobalamin-independent)  
Methionine synthase II (cobalamin-independent)  
Dolichol kinase family protein  
Thymidylate synthase  
Ribosomal protein S17E  
Tyrosyl-tRNA synthetase  
Tryptophanyl-tRNA synthetase  
Thymidylate kinase  
Endonuclease IV  
Sugar phosphate isomerase/epimerase  
Sugar phosphate isomerase/epimerase  
CTP-dependent Riboflavin kinase  
Predicted transcriptional regulator  
Uncharacterized conserved protein

Glutamine synthetase  
Short-chain alcohol dehydrogenase  
Membrane protein implicated in regulation of membrane protease activity  
Membrane protease subunit, stomatin/prohibitin homolog  
Zn-ribbon domain containing protein  
Membrane protease subunit, stomatin/prohibitin homolog  
Sec-independent protein secretion pathway component TatC  
Transcription antiterminator NusG  
Uncharacterized conserved protein  
Protein implicated in ribosomal biogenesis, Nop56p homolog  
L-asparaginase/archaeal Glu-tRNA<sup>Gln</sup> amidotransferase subunit D  
Aerobic-type carbon monoxide dehydrogenase, small subunit CoxS/CutS homolog  
Aerobic-type carbon monoxide dehydrogenase, middle subunit CoxM/CutM homolog  
Carbon monoxide dehydrogenase subunit G, CoxG  
Carbon monoxide dehydrogenase subunit G, CoxG  
Xanthine and CO dehydrogenase maturation factor, XdhC/CoxF family  
Predicted metal-dependent hydrolase of the TIM-barrel fold  
CRISPR system related protein, COG1517 family  
Archaeal serine protease  
Lipoate-protein ligase A  
Biotin-(acetyl-CoA carboxylase) ligase  
Amidase related to nicotinamidase  
Ribosomal protein S6E (S10)  
Putative threonine efflux protein  
Ribosomal protein L24E  
Predicted P-loop ATPase fused to an acetyltransferase  
Putative translation factor (SUA5)  
Kef-type K<sup>+</sup> transport system, membrane component  
Kef-type K<sup>+</sup> transport system, membrane component fused to CBS domains  
Kef-type K<sup>+</sup> transport system, predicted NAD-binding component  
Kef-type K<sup>+</sup> transport system, membrane component  
Thiol-disulfide isomerase or thioredoxin  
Dihydropteroate synthase or related enzyme  
Transcription initiation factor TFIIB, Brf1 subunit/Transcription initiation factor TFIIB  
Predicted TIM-barrel enzyme  
Phosphoribosylanthranilate isomerase  
Ferredoxin-like protein  
Ferredoxin-like protein  
Acyl CoA:acetate/3-ketoacid CoA transferase, alpha subunit  
Translation elongation factor EF-1beta  
Predicted Zn-ribbon RNA-binding protein with a function in translation  
Broad specificity phosphatase PhoE or related phosphatase  
Phosphohistidine phosphatase SixA  
Oligonucleotide cyclase/lipid transport protein family

Multiple antibiotic transporter  
Acetolactate synthase large subunit or other thiamine pyrophosphate-requiring enzyme  
Pyruvate oxidase  
Acetolactate synthase large subunit or other thiamine pyrophosphate-requiring enzyme  
Maleate cis-trans isomerase  
Highly conserved protein containing a thioredoxin domain  
Predicted membrane protein  
Anthranilate phosphoribosyltransferase  
Anthranilate/para-aminobenzoate synthase component I  
Conserved protein/domain typically associated with flavoprotein oxygenase, DIM6/NTAB family  
Rhodanese-related sulfurtransferase  
Rhodanese-related sulfurtransferase  
Polysulphide reductase  
Formate-dependent nitrite reductase, membrane component  
Sugar-specific transcriptional regulator TrmB  
Uncharacterized membrane protein, required for N-linked glycosylation  
Uroporphyrinogen-III synthase  
Predicted permease  
Nucleotide-binding protein, UspA family  
Sulfite reductase, beta subunit (hemoprotein)  
Predicted redox protein, regulator of disulfide bond formation  
Peroxiredoxin family protein  
Peroxiredoxin family protein  
Predicted peroxiredoxin  
Predicted peroxiredoxin  
Predicted redox protein, regulator of disulfide bond formation  
Predicted redox protein, regulator of disulfide bond formation  
Predicted peroxiredoxin  
S-layer domain  
Isopropylmalate/homocitrate/citramalate synthase  
3-dehydroquinone dehydratase  
Chorismate mutase  
Mn-dependent transcriptional regulator (DtxR family)  
Mn-dependent transcriptional regulator (DtxR family)  
Transcriptional regulator, contains wHTH domain  
HEPN domain containing protein  
Minimal nucleotidyltransferase  
Uncharacterized conserved protein  
Uncharacterized conserved protein  
Uncharacterized conserved protein  
Transposase  
Transposase  
Transposase  
Transposase and inactivated derivatives, IS1 family  
Transposase  
Aromatic ring hydroxylase  
Uncharacterized homolog of gamma-carboxymuconolactone decarboxylase subunit  
Predicted membrane protein



Transglutaminase-like enzyme, putative cysteine protease  
6-pyruvoyl-tetrahydropterin synthase  
Organic radical activating enzyme  
Predicted transporter of the RND superfamily  
Ferrodoxin domain containing protein  
2-polyprenylphenol hydroxylase or related flavodoxin oxidoreductase  
Preprotein translocase subunit Sss1  
Exonuclease III  
ATP phosphoribosyltransferase  
Polysaccharide biosynthesis protein, Mvin family  
RHH/CopG DNA binding protein  
RHH/CopG DNA binding protein  
PIN domain containing protein  
PIN domain containing protein  
PIN domain containing protein  
PIN domain containing protein  
Predicted membrane protein  
3-isopropylmalate dehydratase small subunit  
Uncharacterized FAD-dependent dehydrogenase  
Heterodisulfide reductase, subunit A, polyferredoxin  
Heterodisulfide reductase, subunit A or related polyferredoxin  
Heterodisulfide reductase, subunit A or related polyferredoxin  
Transcriptional regulator, contains HTH domain  
Succinate dehydrogenase/fumarate reductase, cytochrome b subunit  
Sirohydrochlorin ferrochelataase  
Precorrin isomerase  
ABC-type cobalt transport system, permease component CbiQ or related transporter  
Mg<sup>2+</sup> and Co<sup>2+</sup> transporter  
Phosphate/sulphate permease  
Predicted transcriptional regulator, C-terminal HTH-like domain  
Predicted transcriptional regulator, C-terminal HTH-like domain  
Predicted transcriptional regulator, C-terminal HTH-like domain  
Uncharacterized beta/alpha-propeller protein, likely forms oligomers  
HAD superfamily hydrolase  
HAD superfamily hydrolase  
Peptidase A24A, prepilin type IV  
Succinyl-CoA:mesaconate CoA-transferase or predicted acyl-CoA transferase/carnitine dehydratase or  
ABC-type antimicrobial peptide transport system, permease component  
Predicted Rossmann fold nucleotide-binding protein  
ABC-type transport system involved in multi-copper enzyme maturation, permease component  
Archaeal/vacuolar-type Na<sup>+</sup>/H<sup>+</sup>-ATPase, subunit K  
Archaeal/vacuolar-type H<sup>+</sup>-ATPase subunit C  
Kynurenine formamidase  
Phosphoribosylcarboxyaminoimidazole (NCAIR) mutase  
RNA-binding protein involved in rRNA processing  
PKD repeats containing protein  
WD40-like repeat  
Beta-propeller repeat containing protein

Beta-propeller repeat containing protein  
Chloride channel protein EriC  
Fe-S-cluster containing protein  
Uncharacterized conserved protein  
Coenzyme F390 synthetase  
Coenzyme F390 synthetase  
Esterase/lipase  
Phosphate transport regulator (distant homolog of PhoU)  
Transcriptional regulator, TetR/AcrR family  
CRISPR system related protein, small subunit of CASCADE complex  
CRISPR system related protein, small subunit of CASCADE complex  
CRISPR system related protein, RAMP superfamily Cas7 group  
CRISPR system related protein, RAMP superfamily Cas5 group  
CRISPR associated protein, polymerase-related domain and HD family nuclease  
CRISPR system related protein Cas5, RAMP superfamily  
Phosphoribosyl-AMP cyclohydrolase  
Phosphoribosyl-ATP pyrophosphohydrolase  
Predicted antitoxin, copG family  
Permease of the major facilitator superfamily  
Sec-independent protein secretion pathway component  
Biotin carboxyl carrier protein  
Pyruvate/2-oxoglutarate dehydrogenase complex, dihydrolipoamide acyltransferase (E2) component (C-terminal f  
SAM-dependent methyltransferase  
SAM-dependent methyltransferase  
Acetyl-CoA carboxylase, carboxyltransferase component  
Lactoylglutathione lyase or related enzyme  
Predicted membrane protein  
Predicted membrane protein  
Methylated DNA-protein cysteine methyltransferase  
Asp-tRNA<sup>Asn</sup>/Glu-tRNA<sup>Gln</sup> amidotransferase C subunit  
Predicted RNA-binding protein containing PUA-domain  
PIN domain containing protein  
PIN domain containing protein  
NifX family protein

NifX family protein  
NifX family protein  
Thiamine biosynthesis protein ThiC  
Transposase, IS5 family  
Transposase  
Uncharacterized conserved protein  
Heavy-metal-associated domain (HMA)  
Copper-ion-binding protein  
Polyferredoxin  
Permease of the major facilitator superfamily  
Permease of the major facilitator superfamily  
Peptide methionine sulfoxide reductase  
Serine protease Do (heat-shock protein)  
Uncharacterized conserved membrane protein  
Deoxyribodipyrimidine photolyase  
ABC-type multidrug transport system, ATPase and permease component  
Ferredoxin subunit of nitrite reductase or ring-hydroxylating dioxygenase  
Carbonic anhydrase  
Predicted membrane protein, DoxD family  
Predicted membrane protein, DoxD family  
Predicted dithiol-disulfide isomerase involved in polyketide biosynthesis  
Ca<sup>2+</sup>/Na<sup>+</sup> antiporter  
Predicted membrane protein  
Predicted membrane protein  
Uncharacterized protein containing a von Willebrand factor type A (vWA) domain  
Pirin-related protein  
Phytoene/squalene synthetase  
Mevalonate pyrophosphate decarboxylase  
Pterin-4a-carbinolamine dehydratase  
Ribonuclease HI  
Bifunctional 4-alpha-glucanotransferase/ amylo-alpha-1,6-glucosidase  
1,4-alpha-glucan branching enzyme  
Maltooligosyl trehalose synthase  
Preprotein translocase subunit Sec61beta  
Predicted aminopeptidase, lap family  
Aminopeptidase N  
Uncharacterized conserved protein  
Cupin domain containing protein  
Gentisate 1,2-dioxygenase  
Cupin domain fused to uncharacterized domain of COG4309  
Eukaryotic-type DNA primase, large subunit  
Nucleoside-diphosphate-sugar epimerase  
Chlorite dismutase  
TPR repeats containing protein  
TPR repeats containing protein

TPR repeats containing protein  
Membrane-associated phospholipid phosphatase  
NADH dehydrogenase subunit 4L (K,kappa)  
Arginine deiminase  
Uncharacterized membrane-associated protein, DedA family  
DedA family membrane protein  
Uncharacterized conserved protein  
Site-specific recombinase, DNA invertase Pin homolog  
Predicted site-specific integrase-resolvase  
AAA+ superfamily ATPase fused to HTH nad RecB nuclease domains  
Predicted ATPase (AAA+ superfamily)  
Predicted ATPase (AAA+ superfamily)  
Predicted ATPase (AAA+ superfamily)  
Predicted membrane protein  
Transcriptional regulator, MarR family  
Transcriptional regulator, MarR family  
UDP-N-acetylmuramyl pentapeptide phosphotransferase/UDP-N-acetylglucosamine-1-phosphate transferase  
Collagenase family protease  
Uncharacterized conserved protein  
Uncharacterized conserved protein  
Predicted ATPase  
ATPase, predicted component of phage defense system  
ATPase, predicted component of phage defense system  
Recombinational DNA repair ATPase RecF  
Predicted exosome subunit/U3 small nucleolar ribonucleoprotein (snoRNP) component, contains IMP4 domain  
Uncharacterized conserved protein, AIG2 family  
Glycosyl hydrolase family 57  
Glycosyl hydrolase family 57  
Glycosyl hydrolase family 15  
Glycosyl hydrolase family 15  
Glycogen debranching enzyme  
Predicted transcriptional regulator  
Uncharacterized protein related to the periplasmic component of the Tol biopolymer transport system  
Protein-tyrosine phosphatase  
Transcriptional regulator, MarR family  
TPR repeats containing protein  
SWIM zinc finger containing protein  
CRISPR system related protein, COG1517 family  
CRISPR system related protein, COG1517 family  
CRISPR system related protein, COG1517 family  
Purine-cytosine permease or related protein  
Cytosine/uracil/thiamine/allantoin permease  
Uncharacterized protein, LmbE homolog  
Amino acid transporter  
Amino acid transporter  
Amino acid transporter  
Amino acid transporter  
Amino acid transporter

CRISPR system related protein, RAMP superfamily Cas7 group  
CRISPR system related helicase, Cas3 (C-terminal HD nuclease domain)  
Uncharacterized conserved protein  
Putative protein-S-isoprenylcysteine methyltransferase  
Transposase  
Transposase  
CRISPR system related protein Cas7, RAMP superfamily  
Hydrogenase 4 membrane component (E)  
Predicted glutamine amidotransferase  
Amino acid transporter  
Thiamine pyrophosphate-requiring enzyme, carboxylase  
Acetolactate synthase large subunit or other thiamine pyrophosphate-requiring enzyme  
Ribonucleotide reductase, beta subunit (ferritin domain)  
Predicted N-acetylglucosamine kinase  
Permease of the major facilitator superfamily  
Alpha-mannosidase  
Alpha-glucosidase, family 31 of glycosyl hydrolase  
Subtilase family protease  
Subtilase family protease  
Thermopsin-like protease  
Thermopsin-like protease  
Thermopsin-like protease  
Thermopsin-like protease  
Thermopsin-like protease  
Membrane associated serine/threonine protein kinase  
Predicted redox protein, regulator of disulfide bond formation  
Uncharacterized conserved protein  
Uncharacterized conserved protein  
Uncharacterized conserved protein  
Polyferredoxin  
Predicted transcriptional regulator, contains HTH domain  
Uncharacterized conserved protein  
Sulfocyanin  
Predicted integral membrane protein  
Predicted integral membrane protein  
Uncharacterized conserved protein  
Predicted metal-dependent hydrolase  
PIN domain containing protein  
HEPN domain containing protein  
HEPN domain containing protein  
HEPN domain containing protein  
Ribonucleotide reductase associated ATP-cone domain  
ATP cone domain  
HEPN domain containing protein

HEPN domain containing protein  
KID-like repeats containing protein, paREP15 family  
Transcriptional regulator of GntR family  
P-loop NTPase superfamily protein  
Predicted aspartyl protease  
Transcriptional regulator, MarR family  
Predicted membrane protein  
CopG family transcriptional regulator  
Uncharacterized conserved protein  
Uncharacterized conserved membrane protein  
Uncharacterized conserved protein  
Uncharacterized conserved protein  
Uncharacterized conserved protein  
GTPase subunit of restriction endonuclease  
CRISPR system associated protein, predicted small subunit of CASCADE complex  
Uncharacterized conserved protein  
Lipoate-protein ligase A associated domain  
Coenzyme PQQ synthesis protein D  
Uncharacterized conserved protein  
Uncharacterized conserved protein  
TlpA/TrxA-like family protein  
TlpA/TrxA-like family protein  
TlpA/TrxA-like family protein  
Predicted antitoxin, copG family  
Predicted antitoxin, copG family  
CRISPR system related protein, COG1517 family  
Uncharacterized conserved protein  
Predicted O-methyltransferase  
Uncharacterized conserved protein  
Glycosyl hydrolase family 12  
Transcriptional regulator containing HTH domain, ArsR family  
Uncharacterized conserved protein  
Uncharacterized conserved protein  
Predicted bile acid beta-glucosidase  
Predicted bile acid beta-glucosidase  
Predicted bile acid beta-glucosidase  
Predicted bile acid beta-glucosidase  
Uncharacterized conserved protein  
Uncharacterized conserved protein  
Flagellar protein G  
Flagellar protein G  
Predicted transcriptional regulator

RadC related protein, contains PAD1/JAB1 superfamily protease domain and ENDO3 nuclease domain  
CRISPR system related protein, RAMP superfamily Cas7 group  
CRISPR system related protein, RAMP superfamily Cas7 group  
Transposase  
Ankyrin repeats containing protein  
Uncharacterized conserved protein  
Uncharacterized conserved protein  
Transcriptional regulator (GntR family)  
Predicted aspartyl protease  
Pepsin-like aspartate protease  
Uncharacterized conserved protein  
Uncharacterized conserved protein  
Eukaryotic-type DNA primase, catalytic (small) subunit homolog, fused to HTH domain  
Uncharacterized conserved protein  
Type IV secretory pathway, VirB4 component  
Uncharacterized conserved protein  
2-amino-3,7-dideoxy-D-threo-hept-6-ulosonic acid synthase, DhnA-aldolase family  
Dihydroxyacid dehydratase/phosphogluconate dehydratase  
Predicted phosphatase  
Deoxycytidine deaminase  
Ribosomal protein L40E  
5'-3' exonuclease (including N-terminal domain of Poll)  
Uncharacterized conserved protein  
Gamma-glutamyltransferase  
Potential cell division protein, a component of ESCRT system  
SHS2 domain protein implicated in nucleic acid metabolism  
Transcriptional regulator containing HTH domain, ArsR family  
Uncharacterized conserved protein  
Predicted transcriptional regulator  
Transcription factor homologous to NACalpha-BTF3  
Uncharacterized conserved protein  
Predicted membrane-associated Zn-dependent protease  
Minimal nucleotidyltransferase  
Ribosomal protein L2  
Membrane protein  
RNA methyltransferase, SPOUT superfamily  
Ribosomal protein L3  
Ribosomal protein L4  
Ribosomal protein L23  
Pyridoxine biosynthesis enzyme  
Uncharacterized conserved protein  
Transcription elongation factor Spt4/RpoE2, zinc finger protein  
DNA helicase TIP49, TBP-interacting protein  
Protein related to penicillin acylase  
Zn-dependent dipeptidase, microsomal dipeptidase homolog  
Ribosomal protein L30  
Ribosomal protein S5  
Ribosomal protein L18

Ribosomal protein L19E  
Ribosomal protein L6P  
Ribosomal protein S8  
Ribosomal protein L5  
Ribosomal protein S4E  
Ribosomal protein L24  
Ribosomal protein L14  
Ribosomal protein S17  
Ribosomal protein S3  
Ribosomal protein L22  
Ribosomal protein S19  
Acyl-CoA dehydrogenase  
Archaeal/vacuolar-type H<sup>+</sup>-ATPase subunit D  
Archaeal/vacuolar-type H<sup>+</sup>-ATPase subunit F  
Uncharacterized conserved protein  
Ribosome associated protein L46a  
Uncharacterized conserved protein  
CDP-diglyceride synthetase  
Translation initiation factor 2, alpha subunit (eIF-2alpha)  
Ribosomal protein S27E  
Ribosomal protein L44E  
Eukaryotic-type DNA primase, catalytic (small) subunit  
DNA-directed RNA polymerase, subunit L  
Diphthamide synthase subunit DPH2  
Ribosomal protein L10AE/L16  
Chromatin protein Cren7  
DNA-binding protein, stimulates sugar fermentation  
ATPase (PiIT family)  
Predicted nucleotidyltransferase  
Pyruvate kinase  
Ribonuclease HII  
EMG1/NEP1 rRNA methyltransferase  
Uncharacterized conserved protein  
Uncharacterized conserved protein  
RNA 3'-terminal phosphate cyclase  
Ribosomal protein L37E  
Predicted GTPase or GTP-binding protein  
Uracil phosphoribosyltransferase  
Ribosomal protein L21E  
Predicted RNA-binding protein  
Dimethyladenosine transferase (rRNA methylation)  
Uncharacterized conserved protein  
Chorismate synthase  
5-enolpyruvylshikimate-3-phosphate synthase  
Zn-finger protein  
Transcription elongation factor Elf1, Zn ribbon-containing protein  
S-adenosylhomocysteine hydrolase  
Archaeal/vacuolar-type H<sup>+</sup>-ATPase subunit I



Uncharacterized conserved protein  
Deoxyhypusine synthase  
DNA topoisomerase VI, subunit A  
Superoxide dismutase  
Predicted ATPase involved in biogenesis of archaeal flagella  
NMD protein affecting ribosome stability and mRNA decay  
Predicted RNA-binding protein (contains KH domains)  
ABC-type multidrug transport system, permease component  
Predicted transcriptional regulator  
RNA polymerase III subunit C34 (Lrp/AsnC family)  
Ribosomal protein S8E  
Wybutosine (yW) biosynthesis enzyme  
Site-specific DNA methylase  
Uncharacterized conserved protein  
Diphthamide biosynthesis methyltransferase  
Uncharacterized conserved protein  
Uncharacterized conserved protein  
Uncharacterized conserved protein  
Ribosomal protein L14E/L6E/L27E  
Ribosomal protein L34E  
Preprotein translocase subunit SecY  
Putative glycerate kinase  
Uncharacterized conserved protein  
Dihydrodipicolinate synthase/N-acetylneuraminate lyase  
Cytidine deaminase  
Wybutosine (yW) biosynthesis enzyme, Fe-S oxidoreductase  
Ribosomal protein L20A (L18A)  
Translation initiation factor 6 (eIF-6)  
Ribosomal protein L39E  
DNA-binding protein  
Bifunctional fructose-1,6-bisphosphate aldolase/phosphatase FBPA/FBPase  
Uncharacterized conserved protein  
Ribosomal protein S24E  
Ribosomal protein S27AE  
Xanthosine triphosphate pyrophosphatase  
Ribosomal protein S15P  
Ribosomal protein S3AE  
Predicted exosome subunit  
dTDP-4-dehydrorhamnose 3,5-epimerase or related enzyme  
ATP sulfurylase (sulfate adenylyltransferase)  
CRISPR-associated protein Cas2  
CRISPR-associated protein, RecB family exonuclease  
Transposase related protein  
Acyl-coenzyme A synthetase/AMP-(fatty) acid ligase  
Archaeal GTP cyclohydrolase III  
N-terminal nucleophile hydrolase superfamily protein  
ERCC4-type nuclease  
Ribosomal protein L37AE/L43A

Ribosomal protein L15E  
Myo-inositol-1-phosphate synthase  
Uncharacterized conserved protein  
Uncharacterized conserved protein  
Predicted metallopeptidase  
Possible nuclease of RNase H fold, RuvC/YqgF family  
Phosphatase of the HAD superfamily  
Translation initiation factor 1 (eIF-1/SUI1)  
Uncharacterized conserved protein  
Predicted phosphatase homologous to the C-terminal domain of histone macroH2A1  
Predicted CoA-binding protein  
Peptidyl-tRNA hydrolase  
Aspartate carbamoyltransferase, regulatory subunit  
Uncharacterized protein involved in tolerance to divalent cations  
Methylmalonyl-CoA mutase  
ABC-type Fe<sup>3+</sup>-hydroxamate transport system, periplasmic component  
Uncharacterized conserved protein  
Predicted thioredoxin/glutaredoxin  
Cysteine desulfurase activator ATPase  
Citrate synthase  
Triphosphoribosyl-dephospho-CoA synthetase  
Ribosomal protein S4 or related protein  
Ribosomal protein S11  
DNA-directed RNA polymerase subunit D  
Ribosomal protein L13  
Ribosomal protein S9  
DNA-directed RNA polymerase, subunit N (RpoN/RPB10)  
Ribosomal protein S2  
RNA 3'-P ligase, RtcB family protein  
Zn-dependent carboxypeptidase  
NAD-dependent protein deacetylase, SIR2 family  
tRNA nucleotidyltransferase (CCA-adding enzyme)  
Solo B3/4 domain (OB-fold DNA/RNA-binding) of Phe-aaRS-beta  
Uncharacterized conserved protein  
tRNA pseudouridine synthase D  
Uncharacterized conserved protein  
Ribosomal protein S7  
Ribosomal protein S12  
DNA-directed RNA polymerase subunit A''  
DNA-directed RNA polymerase subunit A'  
DNA-directed RNA polymerase, subunit H, RpoH/RPB5  
Hydroxymethylglutaryl-CoA reductase  
Uncharacterized conserved protein  
Phosphopantothenate synthetase  
Pantoate kinase  
C4-type Zn-finger protein  
Uncharacterized conserved protein  
Replication initiator protein WhiP, Cdt1-like protein, contains HTH domain

Protein, predicted to be involved in DNA repair  
Transcription initiation factor IIE, alpha subunit  
DNA-directed RNA polymerase, subunit RPB8  
NaMN:DMB phosphoribosyltransferase  
Histidinol-phosphate/aromatic aminotransferase or cobyrinic acid decarboxylase  
Cobalamin biosynthesis protein CobD/CbiB  
Ribonucleotide reductase, alpha subunit  
Translation elongation factor P (EF-P)/translation initiation factor 5A (eIF-5A)  
DNA primase (bacterial type)  
Uncharacterized conserved protein  
Uncharacterized protein involved in propionate catabolism  
Ribosomal protein L12E/L44/L45/RPP1/RPP2  
Ribosomal protein L10  
Ribosomal protein L1  
PIN-domain and Zn ribbon  
Uncharacterized conserved protein  
Ribosomal protein S30  
RecA/RadA recombinase  
Predicted adenosine-specific kinase  
Porphobilinogen deaminase  
Delta-aminolevulinic acid dehydratase  
Glutamyl- or glutaminyI-tRNA synthetase  
Uncharacterized Rossmann fold enzyme  
Ribosomal protein S26  
Ribonuclease G and E  
Uncharacterized conserved protein  
S-adenosyl-l-methionine hydroxide adenosyltransferase  
Acyl-CoA dehydrogenase  
Predicted hydrolase of HD superfamily  
PIN domain containing protein  
Nucleoside diphosphate kinase  
Ribosomal protein S28E/S33  
Predicted RNA-binding protein of the translin family  
Predicted membrane protein  
Uncharacterized conserved protein with similarity to Ribonucleotide reductase and Pyruvate formate lyase  
Zn-finger protein  
Uncharacterized conserved protein  
Phosphate starvation-inducible protein PhoH, predicted ATPase  
Ribosomal protein S25  
Predicted P-loop ATPase/GTPase  
Predicted butyrate kinase  
Predicted thioesterase  
Aspartate/tyrosine/aromatic aminotransferase  
Cobalamin-5-phosphate synthase  
DNA-directed RNA polymerase, subunit RPC12/RpoP (contains C4-type Zn-finger)  
RNase P subunit RPR2  
5-formaminoimidazole-4-carboxamide-1-beta-D-ribofuranosyl 5'-monophosphate synthetase (purine biosynthesis)  
Methylase involved in ubiquinone/menaquinone biosynthesis

Predicted membrane protein  
Acyl-CoA dehydrogenase  
Predicted membrane protein  
Histidinol dehydrogenase  
Tellurite resistance protein or related permease  
Nuclease of restriction endonuclease-like fold, implicated in nucleotide excision repair  
Thermostable 8-oxoguanine DNA glycosylase  
Uncharacterized protein required for formate dehydrogenase activity  
Predicted transcriptional regulator  
Ribosomal protein L11  
Uncharacterized conserved protein  
Cobalamin biosynthesis protein CbiD  
L-lactate permease  
Adenylosuccinate synthase  
Uncharacterized conserved protein  
Ammonia permease  
Imidazoleglycerol-phosphate dehydratase  
Predicted nuclease (RNase H fold)  
Subunit of KEOPS complex (Cgi121BUD32KAE1)  
Phosphoribosylamine-glycine ligase  
Phosphoribosylaminoimidazolesuccinocarboxamide (SAICAR) synthase  
Zn finger protein HypA/HybF (possibly regulating hydrogenase expression)  
Ni,Fe-hydrogenase maturation factor  
HD superfamily phosphohydrolase  
Glycerol uptake facilitator or related permease (Major Intrinsic Protein Family)  
Phosphoenolpyruvate carboxylase  
Uncharacterized protein of DIM6/NTAB family  
Quinolinate synthase  
Phosphoribosylformylglycinamide (FGAM) synthase, PurS component  
Ketol-acid reductoisomerase  
Ribosomal protein L31E  
Uncharacterized conserved protein  
Predicted transcriptional regulator containing an HTH domain fused to a Zn-ribbon  
Transcriptional regulator AbrB  
Acetoacetate decarboxylase related enzyme  
PIN domain containing protein  
Methane/Phenol/Toluene Hydroxylase component  
Urea amidohydrolase (urease) beta subunit  
Urea amidohydrolase (urease) gamma subunit  
Urease accessory protein UreF  
Mn<sup>2+</sup> and Fe<sup>2+</sup> transporter of the NRAMP family  
Fe<sup>2+</sup> dependent formamide hydrolase, cofactor Fo biosynthesis enzyme  
GTP cyclohydrolase I  
Ferrodoxin  
Inosine-uridine nucleoside N-ribohydrolase  
Nucleotidyltransferase/DNA polymerase involved in DNA repair  
SAM-dependent methyltransferase  
Bifunctional b-D-xylosidase/a-L-arabinosidase or related glycosidase

Predicted membrane protein  
NADH dehydrogenase subunit J  
Selenium binding protein SBP56 homolog  
Phospholipid-binding protein  
Nitric oxide reductase large subunit  
Uncharacterized conserved protein  
Uncharacterized conserved protein, contains Fer4-like metal-binding domain ortholog of eukaryotic RNase L inhib  
Predicted permease  
Undecaprenyl pyrophosphate phosphatase  
Nucleoside-diphosphate-sugar epimerase  
Asparaginase  
Phenylacetic acid catabolic protein  
Uncharacterized conserved membrane protein, Fun14 family  
Malate/L-lactate dehydrogenase  
Uncharacterized conserved protein  
Transposase  
ACT domain-containing protein  
Uncharacterized conserved protein  
Lysophospholipase L1 or related esterase  
Uncharacterized conserved protein  
CRISPR associated protein, RAMP family Cas5 group  
Exopolyphosphatase  
Roadblock/LC7 domain  
Predicted secreted endonuclease distantly related to archaeal Holliday junction resolvase  
Pyrimidine dimer DNA glycosylase, T4 endoV family  
Predicted small metal-binding protein  
Muconolactone delta-isomerase  
Acyl CoA:acetate/3-ketoacid CoA transferase, beta subunit  
Altronate dehydratase  
SAF domain, altronate dehydratase related  
Predicted membrane-bound metal-dependent hydrolase  
Uncharacterized conserved protein  
Uncharacterized conserved protein  
Uncharacterized conserved protein  
Predicted transporter component  
FHA domain containing protein  
Uncharacterized conserved protein  
Permease of the major facilitator superfamily  
Thiosulphate:quinone oxidoreductase (TQO) small subunit DoxA  
Permease of the major facilitator superfamily  
NAD(FAD)-dependent dehydrogenase  
Enterochelin esterase or related enzyme  
Uncharacterized conserved protein  
Galactose mutarotase or related enzyme  
Uncharacterized conserved protein  
Hemerythrin HHE cation binding domain containing protein  
Gluconolactonase  
Uncharacterized conserved protein

ABC-type Mn/Zn transport system, ATPase component  
Archaeal succinate dehydrogenase subunit D  
Periplasmic substrate-binding protein  
Predicted membrane protein  
Predicted transcriptional regulator, contains HTH domain  
Predicted membrane protein  
Glycosyltransferase family A  
Protein containing potential lipid transfer domain, START superfamily  
Ribbon-helix-helix protein, copG family  
Predicted heme-degrading monooxygenase  
ABC-type dipeptide/oligopeptide/nickel transport system, ATPase component  
Endo-beta-mannanase  
Beta-glucosidase/6-phospho-beta-glucosidase/beta-galactosidase  
CopG/RHH family DNA binding protein, antitoxin  
Carotene hydroxylase  
Uncharacterized conserved protein  
Zn-ribbon protein  
Glycosyltransferase  
Uncharacterized conserved protein  
Uncharacterized conserved protein  
Uncharacterized conserved protein  
Uncharacterized conserved protein  
Uncharacterized conserved protein, contains N-terminal coiled-coil domain  
Malate synthase  
OB-fold containing protein  
PIN domain containing protein  
Uncharacterized conserved protein  
Predicted permease  
Predicted transporter component  
Uncharacterized conserved protein  
Formate dehydrogenase, cytochrome b556 subunit  
ABC-type sugar transport system, ATPase component  
Dipeptidyl aminopeptidase/acylaminoacyl-peptidase  
Uncharacterized conserved protein  
Uncharacterized conserved protein  
McrBC 5-methylcytosine restriction system component  
Radical SAM superfamily enzyme  
Pyrrolidone-carboxylate peptidase (N-terminal pyroglutamyl peptidase)  
Phosphoenolpyruvate carboxykinase (GTP)  
Uncharacterized conserved protein, DUF1177  
Uncharacterized conserved protein  
Chromosomal protein Sac7d/Sso7d  
Uncharacterized conserved protein  
Uncharacterized conserved protein

Terminal oxidase, subunit doxC  
Terminal oxidase, subunit doxE  
Uncharacterized conserved protein  
Cell surface protein  
Predicted transcriptional regulator  
Uncharacterized conserved protein  
Uncharacterized conserved membrane protein  
Uncharacterized conserved protein  
Ferritin-like domain  
Uncharacterized conserved protein  
Sec-independent protein secretion pathway component  
Uncharacterized conserved protein  
Predicted heterodisulfide reductase subunit  
Uncharacterized conserved protein  
Uncharacterized conserved protein  
HAD superfamily hydrolase  
Uncharacterized conserved protein  
NurA family nuclease  
Uncharacterized conserved protein  
Uncharacterized conserved protein  
Uncharacterized conserved protein  
Homolog of transcription initiation factor TFIIIB, contains Zn-ribbon domain  
Zn-dependent hydrolase, glyoxylase family  
Rossmann-fold NAD(P)(+)-binding protein  
C2H2-type zinc finger  
Predicted ATPase/Helicase of FtsK superfamily  
Acetolactate synthase large subunit or other thiamine pyrophosphate-requiring enzyme  
DNA-directed RNA polymerase subunit 13  
Uncharacterized conserved protein  
Uncharacterized conserved protein  
Uncharacterized conserved protein  
Glycosyltransferase

Uncharacterized conserved protein  
Metal-binding protein with CxxC..HxxxxH signature  
Uncharacterized conserved protein  
Uncharacterized conserved protein  
Predicted ICC-like phosphoesterase  
Uncharacterized conserved protein  
Mn-dependent transcriptional regulator (DtxR family)  
Uncharacterized conserved protein  
Uncharacterized conserved protein  
Acyl-CoA dehydrogenase  
Acyl-CoA dehydrogenase  
Phospholipase C  
Uncharacterized conserved protein  
Uncharacterized conserved protein  
Predicted transcriptional regulator  
Uncharacterized conserved protein  
MFS family permease  
Uncharacterized conserved protein  
Methylase involved in ubiquinone/menaquinone biosynthesis  
Uncharacterized conserved protein  
Uncharacterized conserved protein  
Uncharacterized conserved protein  
Extracellular protein containing Kelch and FN3 domains  
Uncharacterized conserved protein  
Predicted periplasmic solute-binding protein  
Predicted component of pili system  
Pilin/Flagellin  
Uncharacterized conserved protein  
Transcriptional regulator, xre family  
NADPH:quinone reductase or related Zn-dependent oxidoreductase  
ACT domain  
Uncharacterized conserved protein



Transcriptional regulator, contains wHTH domain  
Uncharacterized conserved protein  
Uncharacterized conserved protein  
Uncharacterized conserved protein  
Uncharacterized conserved protein  
Uncharacterized conserved helical repeat protein  
Uncharacterized conserved protein  
Uncharacterized conserved protein  
Predicted periplasmic protein  
Cell surface protein  
ABC-type phosphate transport system, periplasmic component  
2-keto-4-pentenoate hydratase  
Predicted protease with the C-terminal PDZ domain  
Uncharacterized conserved membrane protein  
Uncharacterized conserved protein  
Predicted metal permease  
Predicted permease  
Predicted membrane protein  
Uncharacterized conserved protein  
Uncharacterized conserved protein  
Uncharacterized conserved protein  
Predicted membrane protein  
Cytochrome b558/566, subunit A  
Cytochrome b558/566, subunit B  
Uncharacterized conserved protein  
Uncharacterized conserved protein  
CRISPR system associated transcriptional regulator, containing Rossmann-like and HTH domain  
HEPN domain containing protein  
Uncharacterized conserved protein  
High-affinity nickel permease  
CRISPR-associated protein, RAMP family Cas5 group  
Uncharacterized conserved protein  
HAD superfamily hydrolase  
Uncharacterized conserved protein  
PIN domain containing protein  
Uncharacterized conserved protein  
Uncharacterized conserved protein  
Pyrroloquinoline quinone (Coenzyme PQQ) biosynthesis protein C  
Uncharacterized conserved protein  
Predicted subunit of heme/copper-type cytochrome/quinol oxidase  
Uncharacterized conserved protein  
Uncharacterized conserved protein  
Ferritin domain containing protein  
Catechol 2,3-dioxygenase or other lactoylglutathione lyase family enzyme  
Uncharacterized conserved protein, contains thioredoxin domain  
S-layer protein SlaA  
Uncharacterized conserved protein  
Uncharacterized conserved protein

DKCLD domain, TruB/PUA associated  
Uncharacterized conserved protein  
Transcriptional regulators  
Uncharacterized conserved protein  
Hemerythrin HHE cation binding domain containing protein  
Permease of the major facilitator superfamily  
Uncharacterized conserved protein  
Alpha-galactosidase  
Predicted membrane protein  
Acyl-CoA dehydrogenase  
Uncharacterized conserved protein  
Ni,Fe-hydrogenase maturation factor  
Uncharacterized conserved protein  
Uncharacterized conserved protein  
Uncharacterized conserved protein  
Predicted viral immunity protein, COG1517 superfamily, contains C-terminal PIN domain  
Acyl-coenzyme A synthetase/AMP-(fatty) acid ligase  
Acyl-coenzyme A synthetase/AMP-(fatty) acid ligase  
Inactivated PIWI domain containing phage-defense protein  
Urease accessory protein UreE  
Rdx family selenoprotein  
Transposase and inactivated derivatives, IS5 family  
Prophage maintenance system killer protein  
Phage or plasmid associated DNA primase  
Primase-polymerase (primpol) domain  
Uncharacterized conserved membrane protein  
Zn finger protein  
Uncharacterized conserved protein  
Sulphur oxygenase/reductase  
Uncharacterized conserved protein  
Predicted redox protein, regulator of disulfide bond formation  
Uncharacterized conserved membrane protein  
Uncharacterized protein, possibly involved in utilization of glycolate and propanediol  
Uncharacterized conserved protein  
Predicted solute binding protein  
Uncharacterized conserved protein  
Polysaccharide biosynthesis protein, Mvin family  
Uncharacterized conserved protein  
Uncharacterized conserved protein  
PIN domain  
Uncharacterized conserved protein

Uncharacterized conserved protein  
Uncharacterized conserved protein  
Uncharacterized conserved protein  
Uncharacterized conserved protein  
Predicted transcriptional regulator, PadR family  
Uncharacterized conserved protein  
Uncharacterized conserved protein  
Uncharacterized conserved protein  
Uncharacterized conserved protein  
Uncharacterized conserved membrane protein  
Uncharacterized conserved protein  
Predicted membrane-bound metal-dependent hydrolase, DUF457  
Lysophospholipase, alpha-beta hydrolase superfamily  
Uncharacterized conserved protein  
Zn-finger protein  
Uncharacterized conserved protein  
Uncharacterized conserved protein  
Uncharacterized conserved protein  
Uncharacterized conserved protein  
Heavy-metal-associated domain  
Uncharacterized conserved protein  
Uncharacterized conserved protein  
Uncharacterized conserved protein  
Uncharacterized conserved protein  
Phenylacetic acid-responsive transcriptional repressor  
Uncharacterized conserved protein  
RHH/CopG DNA binding protein  
Uncharacterized protein contains PIN domain  
Uncharacterized conserved protein  
Uncharacterized conserved protein  
Glycosyltransferase  
Uncharacterized conserved protein  
Uncharacterized conserved protein  
Uncharacterized conserved protein  
Uncharacterized conserved protein  
PIN domain

Uncharacterized conserved protein  
Uncharacterized conserved protein  
Predicted transcriptional regulator  
Uncharacterized conserved protein  
Uncharacterized conserved protein  
Uncharacterized conserved protein  
Uncharacterized conserved protein  
CRISPR-associated protein  
Uncharacterized conserved protein  
Uncharacterized conserved protein  
Uncharacterized conserved protein  
L-aminopeptidase/D-esterase  
Uncharacterized conserved protein  
Thermostable phosphotriesterase, metal-dependent hydrolase with the TIM-barrel fold  
Predicted membrane protein with C-terminal Zn ribbon domain  
Uncharacterized conserved protein  
Cu<sup>2+</sup>-containing amine oxidase  
Uncharacterized conserved protein  
Uncharacterized conserved protein  
Uncharacterized conserved protein  
S-layer protein SlaB  
Predicted periplasmic protein  
Uncharacterized conserved protein  
Uncharacterized conserved protein  
Pilin/Flagellin  
SSV1\_ORF\_D-335, predicted GIY-YIG nuclease superfamily protein  
Uncharacterized conserved membrane protein  
Uncharacterized conserved protein  
Uncharacterized conserved protein  
TPR repeats containing protein  
Uncharacterized conserved protein  
Uncharacterized conserved protein  
Uncharacterized conserved protein  
Archaeal/vacuolar-type H<sup>+</sup>-ATPase subunit H  
Uncharacterized conserved protein  
Minimal nucleotidyltransferase  
ATPase involved in chromosome partitioning, ParA family  
Uncharacterized conserved protein  
Uncharacterized conserved protein  
Uncharacterized conserved protein  
CRISPR associated protein  
Uncharacterized conserved protein  
CRISPR-associated protein CsaX

Uncharacterized conserved protein associated with DNA polymerase II  
Uncharacterized conserved protein  
Transposase  
Uncharacterized conserved protein  
Uncharacterized conserved protein  
Uncharacterized conserved protein  
Uncharacterized conserved protein  
Plasmid regulatory DNA-binding protein  
Uncharacterized conserved protein  
Predicted transcriptional regulator, HTH domain  
NurA-like nuclease  
ATPase, uncharacterized  
Uncharacterized conserved protein  
Phospholipase D/Transphosphatidylase  
Uncharacterized conserved protein  
Uncharacterized conserved protein  
Uncharacterized conserved protein  
Uncharacterized conserved protein  
Fe-S oxidoreductase  
Uncharacterized conserved protein  
SAM-dependent methyltransferase  
Beta-galactosidase/beta-glucuronidase  
Alpha-L-fucosidase  
DsrE/DsrF-like family  
Uncharacterized conserved protein  
Acetyltransferase, RimL family  
Uncharacterized conserved membrane protein  
O-Glycosyl hydrolase family 16  
Uncharacterized conserved protein  
Uncharacterized conserved protein  
Type IV secretory pathway, VirB4 component  
Zn-dependent protease  
Uncharacterized conserved protein

Uncharacterized conserved protein  
Predicted metal-binding protein  
PIN domain containing protein  
Uncharacterized conserved protein  
Uncharacterized conserved protein  
SWIM Zn-finger  
Uncharacterized conserved protein  
Uncharacterized conserved protein  
Radical SAM superfamily enzyme  
Uncharacterized conserved protein  
Uncharacterized conserved protein  
Uncharacterized conserved protein  
RHH/CopG DNA binding protein  
Uncharacterized conserved protein  
Uncharacterized conserved protein  
Uncharacterized conserved protein  
ABC-type sugar transport system, periplasmic component, contains N-terminal xre family HTH domain  
DEDD family 3'-5' exonuclease  
Uncharacterized conserved protein  
Transposase  
Uncharacterized conserved protein  
Uncharacterized conserved protein  
HNH superfamily endonuclease  
TOPRIM domain containing protein, predicted phage defense system  
Phenylpropionate dioxygenase or related ring-hydroxylating dioxygenase, large terminal subunit  
PKD domain containing protein  
CRISPR system related protein, RAMP superfamily Cas7 group  
Uncharacterized conserved protein  
Uncharacterized conserved protein  
Ribosome associated protein L45a  
Uncharacterized conserved protein  
Uncharacterized conserved protein  
Predicted regulatory ATPase  
Uncharacterized conserved protein  
Transposase ISC1217  
Transposase ISC1234  
Transposon ISC1160  
Zinc finger C2H2-type  
Uncharacterized protein  
Chromosome partitioning protein ParB  
HTH containing transcriptional regulator  
Uncharacterized protein  
Uncharacterized TIM barrel protein  
ATPase (AAA+ superfamily)  
Uncharacterized protein  
Uncharacterized protein  
TRASH domain-containing protein, metal-binding  
PIN domain containing protein

Predicted membrane protein, DoxX family

Zn zinger protein

Uncharacterized conserved protein

Antitoxin MazE superfamily protein

Uncharacterized conserved protein

Uncharacterized conserved protein

Predicted transcriptional regulator, HTH

Uncharacterized conserved protein

Zn finger protein

Uncharacterized conserved protein

Predicted redox protein, regulator of disulfide bond formation

Ribosome associated protein L47a

Uncharacterized conserved protein

CopG/RHH family DNA binding protein

Methane/Phenol/Toluene Hydroxylase component, ferritin superfamily









Uncharacterized conserved protein

Permease of the major facilitator superfamily

A/G-specific DNA glycosylase

DNA replication initiation complex subunit, GINS23 family

Acetyltransferase (GNAT) family

Radical SAM superfamily enzyme

Radical SAM superfamily enzyme

Alpha/beta-knot SAM-dependent RNA methyltransferase

Hydrogenase maturation factor

Integrase

GDP-D-mannose dehydratase

RecB-like nuclease fused to coiled-coil domain

Ni,Fe-hydrogenase I large subunit

Kef-type K<sup>+</sup> transport system, membrane component fused TrkA K<sup>+</sup> transport system

S-layer domain

Ni,Fe-hydrogenase I small subunit

Type I restriction-modification system methyltransferase subunit

Endonuclease, HJR/Mrr/RecB family

Glycosyltransferase

Predicted membrane protein

S-layer domain

Hydrogenase maturation factor

Hydrogenase maturation factor

AIG2-like family protein

RecA-superfamily ATPase implicated in signal transduction

Membrane-bound NiFe hydrogenase subunit

Membrane-bound NiFe hydrogenase subunit

Uncharacterized conserved protein

SAM-dependent methyltransferase

Predicted ester cyclase

Uncharacterized conserved protein

Uncharacterized conserved protein

Uncharacterized conserved protein

Uncharacterized conserved protein

Alpha/beta superfamily hydrolase

Uncharacterized conserved protein

Uncharacterized conserved protein

Uncharacterized conserved protein

Uncharacterized conserved protein

Uncharacterized conserved protein
