# Supplementary material for: Insights into archaeal evolution and symbiosis from the genomes of a nanoarchaeon and its inferred crenarchaeal host from Obsidian Pool, Yellowstone National Park
Source: Springer Nature journal article supplement (doi:10.1186/1745-6150-8-9), 2013-04-22

*Nanoarchaeota* Nst1

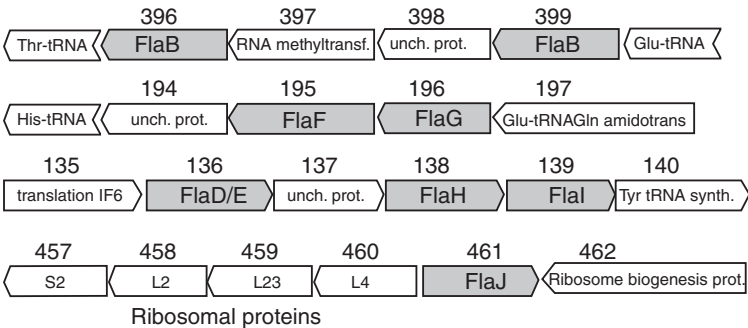

*Sulfolobus acidocaldarius* DSM 639

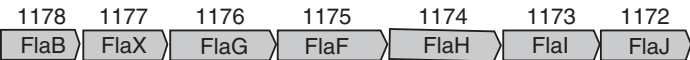

*Pyrococcus horikoshii* OT3

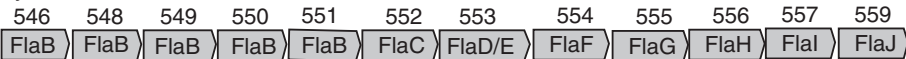

Supplement: 13062_2013_372_MOESM12_ESM.pdf [file 13062_2013_372_MOESM12_ESM.pdf]
