# Supplementary material for: Insights into archaeal evolution and symbiosis from the genomes of a nanoarchaeon and its inferred crenarchaeal host from Obsidian Pool, Yellowstone National Park
Source: Springer Nature journal article supplement (doi:10.1186/1745-6150-8-9), 2013-04-22

**A**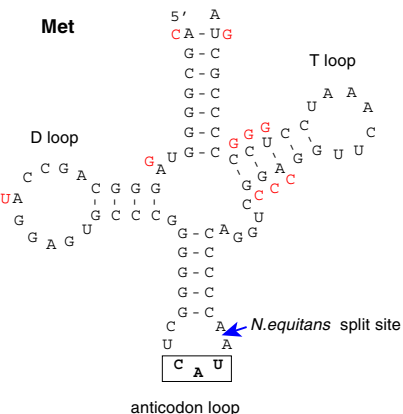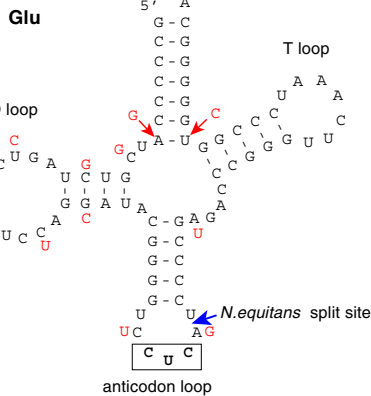**B**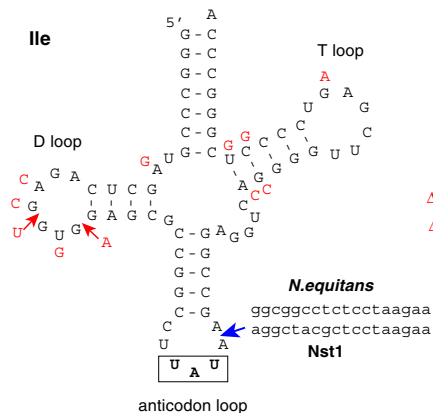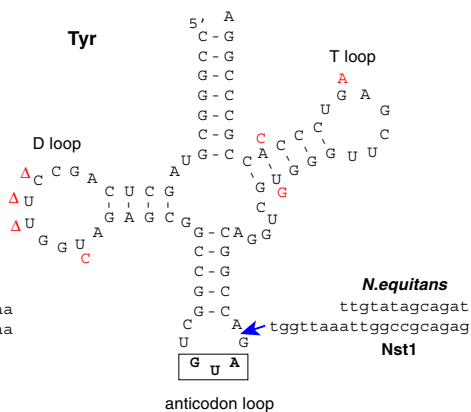

Supplement: 13062_2013_372_MOESM14_ESM.pdf [file 13062_2013_372_MOESM14_ESM.pdf]
